# Supplementary material for: Metaproteomic profiling of fungal gut colonization in gnotobiotic mice
Source: Anim Microbiome. 2022 Feb 22;4:14. doi: 10.1186/s42523-022-00163-2 (PMC8862486; doi:10.1186/s42523-022-00163-2)
Supplement: Supplementary file 2 — Additional file 2: Supplementary Tables S1–2, S4–S8, S9–S14. [file 42523_2022_163_MOESM2_ESM.xlsx]

## Sheet: Sheet1
TABLE	Experiment	DESCRIPTION
S1	Fecal Metaproteomics	Microbial species used for gnotobiotic mice colonization, corresponding protein databases used in MS data search, and details on MS runs
S2	Fecal Metaproteomics and TMT proteomics	Pearson coefficients describing correlation of proteins identification and quantification across replicates.
S3	Fecal Metaproteomics	Peptide sequences detected at 1% FDR (xlsx file Table S3 peptides)
S4	Fecal Metaproteomics	Fecal Proteins detected at 1% FDR , including LFQ intensities
S5	Fecal Metaproteomics	Overview of detected proteomes
S6	Fecal Metaproteomics	Microbial and host proteins used in statistical analyses
S7	Fecal Metaproteomics	Bacterial proteins displayed in Figure 2A, including functional annotation
S8	Fecal Metaproteomics	Number of proteins with significantly increased levels for selected bacterial strains and between different mice groups (pdf file Supplementary Information)
S9	Fecal Metaproteomics	Fungal proteins reported as part of extracellular vesicles
S10	Fecal Metaproteomics	Fecal mouse proteins with significantly differential abundance as determined by ANOVA (FDR 0.05)
S11	TMT Jejunum	Peptide sequences detected at 1% FDR
S12	TMT Jejunum	Proteins from jejunal tissue detected at 1% FDR
S13	TMT Jejunum	Jejunal mouse proteins with significantly differential abundance as determined by ANOVA (FDR 0.05) and posthoc THSD analysis
S14	TMT Jejunum	Pathway enrichment analysis

## Sheet: S1
Table S1. Microbial species used for gnotobiotic mice colonization, corresponding protein databases used in MS data search, and details on MS runs
DATABASES - BACTERIA
Bacterial strain			GenBank Accession	Number of entries
Lachnoclostridium (Clostridium clostridioforme) YL32			CP015399.2	7094
Ruminiclostridium - Hungateiclostridiaceae bacterium (Acutalibacter muris) KB18			CP015400.2	3845
Bacteroides (Bacteroides caecimuris) I48			CP015401.2	4026
Parabacteroides (Muribaculum intestinale) YL27			CP015402.2	2683
Burkholderiales bacterium (Turicimonas muris) YL45			CP015403.2	2563
Erysipelotrichaceae bacterium (Clostridium innocuum) I46			CP015404.2	4359
Blautia coccoides YL58			CP015405.2	4724
Flavonifractor plautii YL31			CP015406.2	3673
Bifidobacterium longum subsp. animalis YL2			CP015407.2	1652
Lactobacillus reuteri I49			CP015408.2	1866
Akkermansia muciniphila YL44			CP015409.2	2349
Enterococcus faecalis KB1			CP015410.2	2939
Total number of entries				41773
DATABASES - FUNGI
Fungal species			UniProtKB Section	Number of entries
Candida albicans			Swiss-Prot & TrEMBL	19268
C. glabrata			Swiss-Prot & TrEMBL	10750
C. parapsilosis			Swiss-Prot & TrEMBL	6033
Pichia kudriavzevii/C. krusei			Swiss-Prot & TrEMBL	17448
Rhodotorula			Swiss-Prot & TrEMBL	52992
Total number of entries				106491
DATABASES - MOUSE
Host species			UniProtKB Accession	Number of entries
Mus musculus			Swiss-Prot	17448
MS RUNS
Sample name			sample IDs used in Analyses	Date (YY-MM-DD)
S9152_W4_B_1_190211			B1	19-02-11
S9153_W4_B_2_190211			B2	19-02-11
S9154_W4_B_3_190211			B3	19-02-11
S9155_W4_B_4_190211			B4	19-02-11
S9156_W4_Y_2_190211			Y2	19-02-11
S9157_W4_Y_3_190211			Y3	19-02-11
S9158_W4_Y_4_190211			Y4	19-02-11
S9159_W4_BY_1_190211			BY1	19-02-11
S9160_W4_BY_2_190211			BY2	19-02-11
S9161_W4_BY_4_190211			BY4	19-02-11
S9354_FE_W4_GF1_190416			GF1	19-04-16
S9355_FE_W4_GF2_190416			GF2	19-04-16
S9356_FE_W4_GF3_190416			GF3	19-04-16
S9357_FE_W4_Abx1_190416			Abx1	19-04-16
S9358_FE_W4_Abx2_190416			Abx2	19-04-16
S9359_FE_W4_Abx3_190416			Abx3	19-04-16
S9360_FE_W4_Afx1_190416			Afx1	19-04-16
S9361_FE_W4_Afx2_190416			Afx2	19-04-16
S9362_FE_W4_Afx3_190416			Afx3	19-04-16
S9417_TMT_A_190503			-	19-05-03
S9418_TMT_B_190503			-	19-05-03
S9419_TMT_C_190503			-	19-05-03
S9420_TMT_D_190503			-	19-05-03
SUMMARY MS SEARCH
Raw file	MS		MS/MS Submitted	MS/MS Identified
W4_FE_Abx1	18201		149932	19639
W4_FE_Abx2	18249		148407	19324
W4_FE_Abx3	17952		146804	19321
W4_FE_Afx1	17932		147946	16914
W4_FE_Afx2	17931		147062	18393
W4_FE_Afx3	17950		145272	15944
W4_FE_B1	17745		146521	14814
W4_FE_B2	17763		147097	14853
W4_FE_B3	17722		144884	14180
W4_FE_B4	17787		145135	14349
W4_FE_BY1	17705		146521	12887
W4_FE_BY2	17669		146679	12459
W4_FE_BY4	17426		142841	12267
W4_FE_GF1	19362		153059	3301
W4_FE_GF2	19063		152198	3423
W4_FE_GF3	19008		152426	3181
W4_FE_Y2	18394		152895	4322
W4_FE_Y3	18020		153054	5071
W4_FE_Y4	17834		153409	4870

## Sheet: S2
Table S2 Pearson coefficients describing correlation of proteins identifications between replicates.
	Intensity ABX1	Intensity ABX2	Intensity ABX3				LFQ Intensity ABX1	LFQ Intensity ABX2	LFQ Intensity ABX3			TMT	B2	B3	B4	B5	B6
Intensity ABX1		0.964	0.92			LFQ Intensity ABX1		0.978	0.94			B2		0.978	0.98	0.974	0.986
Intensity ABX2			0.924			LFQ Intensity ABX2			0.938			B3			0.987	0.982	0.987
Intensity ABX3						LFQ Intensity ABX3						B4				0.986	0.982
												B5					0.984
	Intensity AFX1	Intensity AFX2	Intensity AFX3				LFQ Intensity AFX1	LFQ Intensity AFX2	LFQ Intensity AFX3			B6
Intensity AFX1		0.953	0.924			LFQ Intensity AFX1		0.972	0.938
Intensity AFX2			0.93			LFQ Intensity AFX2			0.946			TMT	BY2	BY3	BY4	BY5	BY6
Intensity AFX3						LFQ Intensity AFX3						BY2		0.986	0.989	0.982	0.985
												BY3			0.994	0.985	0.986
	Intensity GF1	Intensity GF2	Intensity GF3				LFQ Intensity GF1	LFQ Intensity GF2	LFQ Intensity GF3			BY4				0.986	0.985
Intensity GF1		0.832	0.822			LFQ Intensity GF1		0.946	0.938			BY5					0.991
Intensity GF2			0.846			LFQ Intensity GF2			0.942			BY6
Intensity GF3						LFQ Intensity GF3
												TMT	GF1	GF2	GF3	GF4	GF5
	Intensity B1	Intensity B2	Intensity B3	Intensity B4			LFQ Intensity B1	LFQ Intensity B2	LFQ Intensity B3	LFQ Intensity B4		GF1		0.978	0.979	0.986	0.984
Intensity B1		0.951	0.947	0.933		LFQ Intensity B1		0.977	0.979	0.975		GF2			0.984	0.989	0.987
Intensity B2			0.95	0.929		LFQ Intensity B2			0.975	0.974		GF3				0.988	0.978
Intensity B3				0.948		LFQ Intensity B3				0.977		GF4					0.988
Intensity B4						LFQ Intensity B4						GF5
	Intensity BY1	Intensity BY2	Intensity BY4				LFQ Intensity BY1	LFQ Intensity BY2	LFQ Intensity BY4			TMT	Y1	Y2	Y3	Y4	Y5
Intensity BY1		0.927	0.886			LFQ Intensity BY1		0.968	0.942			Y1		0.971	0.991	0.987	0.988
Intensity BY2			0.899			LFQ Intensity BY2			0.94			Y2			0.978	0.976	0.962
Intensity BY4						LFQ Intensity BY4						Y3				0.991	0.99
												Y4					0.982
	Intensity Y2	Intensity Y3	Intensity Y4				LFQ Intensity Y2	LFQ Intensity Y3	LFQ Intensity Y4			Y5
Intensity Y2		0.843	0.838			LFQ Intensity Y2		0.946	0.946
Intensity Y3			0.905			LFQ Intensity Y3			0.965
Intensity Y4						LFQ Intensity Y4

## Sheet: S4
									Table S4. Fecal Proteins detected at 1% FDR , including LFQ intensities.
UniProt Entry	UniProt Status	Protein names	Gene names	Protein IDs	Majority protein IDs	Organism	Gene ontology (biological process)	Gene ontology (cellular component)	Gene ontology (molecular function)	Gene ontology (GO)	Database Fasta headers	Number of All Identified Peptides	Unique peptides	Razor + unique peptides	Sequence coverage [%]	Unique + razor sequence coverage [%]	Unique sequence coverage [%]	Mol. weight [kDa]	Sequence length	Q-value	Score	Identification type Abx1	Identification type Abx2	Identification type Abx3	Identification type Afx1	Identification type Afx2	Identification type Afx3	Identification type B1	Identification type B2	Identification type B3	Identification type B4	Identification type BY1	Identification type BY2	Identification type BY4	Identification type GF1	Identification type GF2	Identification type GF3	Identification type Y2	Identification type Y3	Identification type Y4	Intensity	Intensity Abx1	Intensity Abx2	Intensity Abx3	Intensity Afx1	Intensity Afx2	Intensity Afx3	Intensity B1	Intensity B2
A0A059MWN1	unreviewed	30S ribosomal protein S5	rpsE HMPREF2097_03358	A0A059MWN1	A0A059MWN1	Enterococcus faecalis 918	translation [GO:0006412]	small ribosomal subunit [GO:0015935]	rRNA binding [GO:0019843]; structural constituent of ribosome [GO:0003735]	small ribosomal subunit [GO:0015935]; rRNA binding [GO:0019843]; structural constituent of ribosome [GO:0003735]; translation [GO:0006412]	tr|A0A059MWN1|A0A059MWN1_ENTFL 30S ribosomal protein S5 OS=Enterococcus faecalis 918 OX=1338519 GN=rpsE PE=3 SV=1	4	3	3	36.1	30.7	30.7	17.417	166	0.00028289	9.1181			By matching	By matching	By matching									By matching				By matching		226660000	0	0	854750	919310	1087500	0	0	0
A0A059MX74	unreviewed	Elongation factor G (EF-G)	fusA HMPREF2097_03381	A0A059MX74	A0A059MX74	Enterococcus faecalis 918		cytoplasm [GO:0005737]	GTPase activity [GO:0003924]; GTP binding [GO:0005525]; translation elongation factor activity [GO:0003746]	cytoplasm [GO:0005737]; GTP binding [GO:0005525]; GTPase activity [GO:0003924]; translation elongation factor activity [GO:0003746]	tr|A0A059MX74|A0A059MX74_ENTFL Elongation factor G OS=Enterococcus faecalis 918 OX=1338519 GN=fusA PE=3 SV=1	15	15	15	44.7	44.7	44.7	76.678	693	0	50.728	By matching		By matching	By matching	By matching						By matching									686430000	2865300	0	2097700	813250	1819100	0	0	0
A0A059MX76	unreviewed	Polyribonucleotide nucleotidyltransferase (EC 2.7.7.8) (Polynucleotide phosphorylase) (PNPase)	pnp HMPREF2097_03204	A0A059MX76	A0A059MX76	Enterococcus faecalis 918	mRNA catabolic process [GO:0006402]; RNA processing [GO:0006396]	cytoplasm [GO:0005737]	magnesium ion binding [GO:0000287]; polyribonucleotide nucleotidyltransferase activity [GO:0004654]; RNA binding [GO:0003723]	cytoplasm [GO:0005737]; magnesium ion binding [GO:0000287]; polyribonucleotide nucleotidyltransferase activity [GO:0004654]; RNA binding [GO:0003723]; mRNA catabolic process [GO:0006402]; RNA processing [GO:0006396]	tr|A0A059MX76|A0A059MX76_ENTFL Polyribonucleotide nucleotidyltransferase OS=Enterococcus faecalis 918 OX=1338519 GN=pnp PE=3 SV=1	1	1	1	1.6	1.6	1.6	77.047	704	0.0014482	2.6251	By MS/MS	By MS/MS	By matching	By matching	By MS/MS	By matching							By matching	By matching	By MS/MS					44153000	5593300	6849600	4991600	4856000	5710800	5657700	0	0
A0A059MXG9	unreviewed	Glyceraldehyde-3-phosphate dehydrogenase (EC 1.2.1.-)	HMPREF2097_03150	A0A059MXG9;A0A059N644	A0A059MXG9	Enterococcus faecalis 918	glucose metabolic process [GO:0006006]		NAD binding [GO:0051287]; NADP binding [GO:0050661]; oxidoreductase activity, acting on the aldehyde or oxo group of donors, NAD or NADP as acceptor [GO:0016620]	NAD binding [GO:0051287]; NADP binding [GO:0050661]; oxidoreductase activity, acting on the aldehyde or oxo group of donors, NAD or NADP as acceptor [GO:0016620]; glucose metabolic process [GO:0006006]	tr|A0A059MXG9|A0A059MXG9_ENTFL Glyceraldehyde-3-phosphate dehydrogenase OS=Enterococcus faecalis 918 OX=1338519 GN=HMPREF2097_03150 PE=3 SV=1	11	9	9	50.2	44.1	44.1	35.771	333	0	323.31	By matching	By matching	By MS/MS	By MS/MS	By MS/MS	By MS/MS	By matching	By matching	By matching	By matching	By matching	By matching	By matching	By matching	By matching	By matching	By matching	By matching	By matching	2743100000	2942100	6309300	9456400	11881000	13851000	15404000	0	0
A0A059MXK3	unreviewed	Acetate kinase (EC 2.7.2.1) (Acetokinase)	ackA HMPREF2097_03169	A0A059MXK3	A0A059MXK3	Enterococcus faecalis 918	acetyl-CoA biosynthetic process [GO:0006085]; organic acid metabolic process [GO:0006082]	cytoplasm [GO:0005737]	acetate kinase activity [GO:0008776]; ATP binding [GO:0005524]; magnesium ion binding [GO:0000287]	cytoplasm [GO:0005737]; acetate kinase activity [GO:0008776]; ATP binding [GO:0005524]; magnesium ion binding [GO:0000287]; acetyl-CoA biosynthetic process [GO:0006085]; organic acid metabolic process [GO:0006082]	tr|A0A059MXK3|A0A059MXK3_ENTFL Acetate kinase OS=Enterococcus faecalis 918 OX=1338519 GN=ackA PE=3 SV=1	3	2	2	8.9	4.1	4.1	43.407	395	0.0027357	2.1988			By matching	By matching	By matching	By matching														346580000	0	0	486260	409080	544200	537720	0	0
A0A059MXK8	unreviewed	Elongation factor Tu (EF-Tu)	tuf HMPREF2097_03380	A0A059MXK8	A0A059MXK8	Enterococcus faecalis 918		cytoplasm [GO:0005737]	GTPase activity [GO:0003924]; GTP binding [GO:0005525]; translation elongation factor activity [GO:0003746]	cytoplasm [GO:0005737]; GTP binding [GO:0005525]; GTPase activity [GO:0003924]; translation elongation factor activity [GO:0003746]	tr|A0A059MXK8|A0A059MXK8_ENTFL Elongation factor Tu OS=Enterococcus faecalis 918 OX=1338519 GN=tuf PE=3 SV=1	18	15	15	74.4	62	62	43.387	395	0	323.31	By MS/MS	By matching	By MS/MS	By MS/MS	By MS/MS	By MS/MS	By matching	By matching	By matching	By matching	By MS/MS	By matching	By matching	By matching	By matching	By matching	By matching	By matching	By matching	4311900000	12706000	12838000	20974000	15331000	18239000	20915000	1003800	3460000
A0A059MXW6	unreviewed	Enolase (EC 4.2.1.11) (2-phospho-D-glycerate hydro-lyase) (2-phosphoglycerate dehydratase)	eno HMPREF2097_03147	A0A059MXW6	A0A059MXW6	Enterococcus faecalis 918	glycolytic process [GO:0006096]	cell surface [GO:0009986]; extracellular region [GO:0005576]; phosphopyruvate hydratase complex [GO:0000015]	magnesium ion binding [GO:0000287]; phosphopyruvate hydratase activity [GO:0004634]	cell surface [GO:0009986]; extracellular region [GO:0005576]; phosphopyruvate hydratase complex [GO:0000015]; magnesium ion binding [GO:0000287]; phosphopyruvate hydratase activity [GO:0004634]; glycolytic process [GO:0006096]	tr|A0A059MXW6|A0A059MXW6_ENTFL Enolase OS=Enterococcus faecalis 918 OX=1338519 GN=eno PE=3 SV=1	11	11	11	42.4	42.4	42.4	46.511	432	0	212.97		By matching	By MS/MS	By MS/MS	By MS/MS	By MS/MS						By matching							By matching	575730000	0	1188000	5098000	10685000	11520000	10196000	0	0
A0A059MY35	unreviewed	Glutamine--fructose-6-phosphate aminotransferase [isomerizing] (EC 2.6.1.16) (D-fructose-6-phosphate amidotransferase) (GFAT) (Glucosamine-6-phosphate synthase) (Hexosephosphate aminotransferase) (L-glutamine--D-fructose-6-phosphate amidotransferase)	glmS HMPREF2097_02892	A0A059MY35	A0A059MY35	Enterococcus faecalis 918	carbohydrate derivative biosynthetic process [GO:1901137]; carbohydrate metabolic process [GO:0005975]; glutamine metabolic process [GO:0006541]	cytoplasm [GO:0005737]	carbohydrate derivative binding [GO:0097367]; glutamine-fructose-6-phosphate transaminase (isomerizing) activity [GO:0004360]	cytoplasm [GO:0005737]; carbohydrate derivative binding [GO:0097367]; glutamine-fructose-6-phosphate transaminase (isomerizing) activity [GO:0004360]; carbohydrate derivative biosynthetic process [GO:1901137]; carbohydrate metabolic process [GO:0005975]; glutamine metabolic process [GO:0006541]	tr|A0A059MY35|A0A059MY35_ENTFL Glutamine--fructose-6-phosphate aminotransferase [isomerizing] OS=Enterococcus faecalis 918 OX=1338519 GN=glmS PE=3 SV=1	7	7	7	20.6	20.6	20.6	65.335	602	0.00017957	18.022									By matching						By matching		By matching	By matching		491510000	0	0	0	0	0	0	0	0
A0A059MY98	unreviewed	60 kDa chaperonin (GroEL protein) (Protein Cpn60)	groL groEL HMPREF2097_02972	A0A059MY98	A0A059MY98	Enterococcus faecalis 918	protein refolding [GO:0042026]	cytoplasm [GO:0005737]	ATP binding [GO:0005524]; unfolded protein binding [GO:0051082]	cytoplasm [GO:0005737]; ATP binding [GO:0005524]; unfolded protein binding [GO:0051082]; protein refolding [GO:0042026]	tr|A0A059MY98|A0A059MY98_ENTFL 60 kDa chaperonin OS=Enterococcus faecalis 918 OX=1338519 GN=groL PE=3 SV=1	16	13	13	47.1	42	42	57.11	541	0	61.618	By matching	By matching	By matching	By MS/MS	By matching	By MS/MS	By matching	By matching	By matching	By matching	By matching	By matching	By matching	By matching	By matching	By matching	By matching	By matching	By matching	647360000	0	0	0	26698000	1674000	22882000	2876900	3722000
A0A059MYH1	unreviewed	Glycine cleavage H-protein	HMPREF2097_02636	A0A059MYH1	A0A059MYH1	Enterococcus faecalis 918	glycine decarboxylation via glycine cleavage system [GO:0019464]	glycine cleavage complex [GO:0005960]		glycine cleavage complex [GO:0005960]; glycine decarboxylation via glycine cleavage system [GO:0019464]	tr|A0A059MYH1|A0A059MYH1_ENTFL Glycine cleavage H-protein OS=Enterococcus faecalis 918 OX=1338519 GN=HMPREF2097_02636 PE=4 SV=1	2	2	2	47.7	47.7	47.7	11.583	107	0	67.187		By matching		By matching		By matching						By matching			By matching			By matching		120020000	0	601400	0	339840	0	466230	0	0
A0A059MYP9	unreviewed	DNA protection during starvation protein	HMPREF2097_02922	A0A059MYP9	A0A059MYP9	Enterococcus faecalis 918			ferric iron binding [GO:0008199]; oxidoreductase activity, oxidizing metal ions [GO:0016722]	ferric iron binding [GO:0008199]; oxidoreductase activity, oxidizing metal ions [GO:0016722]	tr|A0A059MYP9|A0A059MYP9_ENTFL DNA protection during starvation protein OS=Enterococcus faecalis 918 OX=1338519 GN=HMPREF2097_02922 PE=3 SV=1	4	4	4	46.5	46.5	46.5	17.888	155	0.00031109	11.927	By matching	By matching	By matching	By MS/MS	By matching	By matching							By matching							241570000	1325200	1171600	4851600	6667200	7078600	5633500	0	0
A0A059MYV1	unreviewed	Pyruvate synthase	HMPREF2097_02610	A0A059MYV1	A0A059MYV1	Enterococcus faecalis 918	electron transport chain [GO:0022900]		4 iron, 4 sulfur cluster binding [GO:0051539]; iron ion binding [GO:0005506]; oxidoreductase activity, acting on the aldehyde or oxo group of donors [GO:0016903]; thiamine pyrophosphate binding [GO:0030976]	4 iron, 4 sulfur cluster binding [GO:0051539]; iron ion binding [GO:0005506]; oxidoreductase activity, acting on the aldehyde or oxo group of donors [GO:0016903]; thiamine pyrophosphate binding [GO:0030976]; electron transport chain [GO:0022900]	tr|A0A059MYV1|A0A059MYV1_ENTFL Pyruvate synthase OS=Enterococcus faecalis 918 OX=1338519 GN=HMPREF2097_02610 PE=3 SV=1	2	2	2	1.4	1.4	1.4	130.56	1177	0.0010146	2.7435	By matching	By matching	By matching	By MS/MS	By MS/MS	By matching	By MS/MS	By MS/MS	By MS/MS	By MS/MS	By MS/MS	By MS/MS	By MS/MS	By matching	By matching		By matching	By matching		3689600000	92974000	79076000	90920000	74434000	75288000	52026000	83430000	91470000
A0A059MZB9	unreviewed	GTP-binding protein TypA	HMPREF2097_02674	A0A059MZB9	A0A059MZB9	Enterococcus faecalis 918	translation [GO:0006412]		GTPase activity [GO:0003924]; GTP binding [GO:0005525]	GTP binding [GO:0005525]; GTPase activity [GO:0003924]; translation [GO:0006412]	tr|A0A059MZB9|A0A059MZB9_ENTFL GTP-binding protein TypA OS=Enterococcus faecalis 918 OX=1338519 GN=HMPREF2097_02674 PE=4 SV=1	1	1	1	3	3	3	67.138	602	0.00077942	3.2402	By MS/MS	By MS/MS	By MS/MS	By MS/MS	By MS/MS	By MS/MS							By matching							37825000	5478900	7118400	8544700	6091500	4056500	4950400	0	0
A0A059MZE3	unreviewed	Uracil phosphoribosyltransferase (EC 2.4.2.9) (UMP pyrophosphorylase) (UPRTase)	upp HMPREF2097_02618	A0A059MZE3;A0A073JNT9	A0A059MZE3	Enterococcus faecalis 918	nucleoside metabolic process [GO:0009116]; UMP salvage [GO:0044206]; uracil salvage [GO:0006223]		GTP binding [GO:0005525]; magnesium ion binding [GO:0000287]; uracil phosphoribosyltransferase activity [GO:0004845]	GTP binding [GO:0005525]; magnesium ion binding [GO:0000287]; uracil phosphoribosyltransferase activity [GO:0004845]; nucleoside metabolic process [GO:0009116]; UMP salvage [GO:0044206]; uracil salvage [GO:0006223]	tr|A0A059MZE3|A0A059MZE3_ENTFL Uracil phosphoribosyltransferase OS=Enterococcus faecalis 918 OX=1338519 GN=upp PE=3 SV=1	5	5	5	34.4	34.4	34.4	22.884	209	0.00034827	5.2974								By matching				By matching	By matching							123260000	0	0	0	0	0	0	0	1297600
A0A059MZJ4	unreviewed	Aldehyde-alcohol dehydrogenase	HMPREF2097_02509	A0A059MZJ4	A0A059MZJ4	Enterococcus faecalis 918	alcohol metabolic process [GO:0006066]; carbon utilization [GO:0015976]		acetaldehyde dehydrogenase (acetylating) activity [GO:0008774]; alcohol dehydrogenase (NAD+) activity [GO:0004022]; metal ion binding [GO:0046872]	acetaldehyde dehydrogenase (acetylating) activity [GO:0008774]; alcohol dehydrogenase (NAD+) activity [GO:0004022]; metal ion binding [GO:0046872]; alcohol metabolic process [GO:0006066]; carbon utilization [GO:0015976]	tr|A0A059MZJ4|A0A059MZJ4_ENTFL Aldehyde-alcohol dehydrogenase OS=Enterococcus faecalis 918 OX=1338519 GN=HMPREF2097_02509 PE=3 SV=1	18	18	18	36.4	36.4	36.4	94.501	867	0	323.31	By matching			By matching			By matching		By matching	By matching	By matching	By matching	By matching				By matching	By matching		3379400000	30262000	0	0	34425000	0	0	813950	0
A0A059MZX0	unreviewed	PTS system, mannose/fructose/sorbose family, IID component	HMPREF2097_02249	A0A059MZX0	A0A059MZX0	Enterococcus faecalis 918	phosphoenolpyruvate-dependent sugar phosphotransferase system [GO:0009401]	integral component of membrane [GO:0016021]; plasma membrane [GO:0005886]		integral component of membrane [GO:0016021]; plasma membrane [GO:0005886]; phosphoenolpyruvate-dependent sugar phosphotransferase system [GO:0009401]	tr|A0A059MZX0|A0A059MZX0_ENTFL PTS system, mannose/fructose/sorbose family, IID component OS=Enterococcus faecalis 918 OX=1338519 GN=HMPREF2097_02249 PE=4 SV=1	7	7	7	39.9	39.9	39.9	33.33	303	0	34.403			By matching	By matching	By matching	By matching														868530000	0	0	888890	3791100	1907400	1747000	0	0
A0A059N018	unreviewed	Ornithine carbamoyltransferase (OTCase) (EC 2.1.3.3)	HMPREF2097_02337	A0A059N018	A0A059N018	Enterococcus faecalis 918		cytoplasm [GO:0005737]	amino acid binding [GO:0016597]; ornithine carbamoyltransferase activity [GO:0004585]	cytoplasm [GO:0005737]; amino acid binding [GO:0016597]; ornithine carbamoyltransferase activity [GO:0004585]	tr|A0A059N018|A0A059N018_ENTFL Ornithine carbamoyltransferase OS=Enterococcus faecalis 918 OX=1338519 GN=HMPREF2097_02337 PE=3 SV=1	12	12	12	54.9	54.9	54.9	38.029	339	0	42.33	By MS/MS	By MS/MS	By MS/MS	By MS/MS	By MS/MS	By MS/MS		By matching	By matching		By matching	By matching	By matching	By matching		By matching				943620000	9158500	21320000	27414000	22678000	25462000	14656000	0	453960
A0A059N064	unreviewed	Cold shock protein CspA	HMPREF2097_02390	A0A059N064	A0A059N064	Enterococcus faecalis 918		cytoplasm [GO:0005737]	nucleic acid binding [GO:0003676]	cytoplasm [GO:0005737]; nucleic acid binding [GO:0003676]	tr|A0A059N064|A0A059N064_ENTFL Cold shock protein CspA OS=Enterococcus faecalis 918 OX=1338519 GN=HMPREF2097_02390 PE=4 SV=1	1	1	1	25.8	25.8	25.8	7.1137	66	0	58.46			By matching	By MS/MS	By MS/MS															7734100	0	0	1127100	4211600	2395400	0	0	0
A0A059N0D2	unreviewed	Arginine deiminase (ADI) (EC 3.5.3.6) (Arginine dihydrolase) (AD)	arcA HMPREF2097_02336	A0A059N0D2	A0A059N0D2	Enterococcus faecalis 918	arginine catabolic process to ornithine [GO:0019547]	cytoplasm [GO:0005737]	arginine deiminase activity [GO:0016990]	cytoplasm [GO:0005737]; arginine deiminase activity [GO:0016990]; arginine catabolic process to ornithine [GO:0019547]	tr|A0A059N0D2|A0A059N0D2_ENTFL Arginine deiminase OS=Enterococcus faecalis 918 OX=1338519 GN=arcA PE=3 SV=1	12	12	12	40	40	40	46.735	408	0	32.001	By matching	By MS/MS	By matching	By MS/MS	By MS/MS	By MS/MS	By matching		By matching	By matching	By matching	By matching	By matching			By matching				790890000	4719300	7959900	10119000	12315000	18808000	11131000	1294400	0
A0A059N0L0	unreviewed	EIIAB-Man (EC 2.7.1.191) (EIII-Man) (Mannose-specific phosphotransferase enzyme IIA component) (Mannose-specific phosphotransferase enzyme IIB component) (PTS system mannose-specific EIIA component) (PTS system mannose-specific EIIAB component) (PTS system mannose-specific EIIB component)	HMPREF2097_02247	A0A059N0L0	A0A059N0L0	Enterococcus faecalis 918	phosphoenolpyruvate-dependent sugar phosphotransferase system [GO:0009401]	cytoplasm [GO:0005737]; integral component of membrane [GO:0016021]; plasma membrane [GO:0005886]	kinase activity [GO:0016301]; protein-N(PI)-phosphohistidine-sugar phosphotransferase activity [GO:0008982]	cytoplasm [GO:0005737]; integral component of membrane [GO:0016021]; plasma membrane [GO:0005886]; kinase activity [GO:0016301]; protein-N(PI)-phosphohistidine-sugar phosphotransferase activity [GO:0008982]; phosphoenolpyruvate-dependent sugar phosphotransferase system [GO:0009401]	tr|A0A059N0L0|A0A059N0L0_ENTFL Putative PTS system mannose-specific EIIAB component OS=Enterococcus faecalis 918 OX=1338519 GN=HMPREF2097_02247 PE=4 SV=1	5	5	5	18.5	18.5	18.5	41.582	383	0.00028927	9.7675	By matching				By matching		By matching					By matching	By matching	By matching						282420000	311700	0	0	0	576460	0	1865300	0
A0A059N0L4	unreviewed	S-ribosylhomocysteine lyase (EC 4.4.1.21) (AI-2 synthesis protein) (Autoinducer-2 production protein LuxS)	luxS HMPREF2097_01849	A0A059N0L4	A0A059N0L4	Enterococcus faecalis 918	quorum sensing [GO:0009372]		iron ion binding [GO:0005506]; S-ribosylhomocysteine lyase activity [GO:0043768]	iron ion binding [GO:0005506]; S-ribosylhomocysteine lyase activity [GO:0043768]; quorum sensing [GO:0009372]	tr|A0A059N0L4|A0A059N0L4_ENTFL S-ribosylhomocysteine lyase OS=Enterococcus faecalis 918 OX=1338519 GN=luxS PE=3 SV=1	4	4	4	38.8	38.8	38.8	17.111	152	0.00041775	3.9276	By matching	By matching	By matching	By MS/MS	By matching	By matching				By matching										65294000	2059100	2333800	1271500	2638900	1433100	1284700	0	0
A0A059N0R1	unreviewed	Flavin reductase	HMPREF2097_01894	A0A059N0R1	A0A059N0R1	Enterococcus faecalis 918			oxidoreductase activity [GO:0016491]	oxidoreductase activity [GO:0016491]	tr|A0A059N0R1|A0A059N0R1_ENTFL Flavin reductase OS=Enterococcus faecalis 918 OX=1338519 GN=HMPREF2097_01894 PE=4 SV=1	2	2	2	25.7	25.7	25.7	22.628	202	0.00068993	3.336								By matching	By matching	By MS/MS										109110000	0	0	0	0	0	0	0	2915300
A0A059N0T5	unreviewed	Uncharacterized protein	HMPREF2097_02307	A0A059N0T5	A0A059N0T5	Enterococcus faecalis 918					tr|A0A059N0T5|A0A059N0T5_ENTFL Uncharacterized protein OS=Enterococcus faecalis 918 OX=1338519 GN=HMPREF2097_02307 PE=4 SV=1	5	5	5	24.2	24.2	24.2	20.553	186	0	323.31	By matching			By MS/MS	By MS/MS	By MS/MS	By matching				By matching									631030000	538350	0	0	3064400	2406600	1846600	256130	0
A0A059N0X1	unreviewed	Uncharacterized protein	HMPREF2097_01954	A0A059N0X1	A0A059N0X1	Enterococcus faecalis 918					tr|A0A059N0X1|A0A059N0X1_ENTFL Uncharacterized protein OS=Enterococcus faecalis 918 OX=1338519 GN=HMPREF2097_01954 PE=4 SV=1	1	1	1	16.8	16.8	16.8	13.379	119	0.00026976	7.9246	By matching	By matching	By matching	By matching	By matching									By matching						56561000	1460200	923470	1038600	195010	956300	0	0	0
A0A059N0Z4	unreviewed	Chaperone protein DnaK (HSP70) (Heat shock 70 kDa protein) (Heat shock protein 70)	dnaK HMPREF2097_01979	A0A059N0Z4	A0A059N0Z4	Enterococcus faecalis 918	protein folding [GO:0006457]		ATP binding [GO:0005524]; unfolded protein binding [GO:0051082]	ATP binding [GO:0005524]; unfolded protein binding [GO:0051082]; protein folding [GO:0006457]	tr|A0A059N0Z4|A0A059N0Z4_ENTFL Chaperone protein DnaK OS=Enterococcus faecalis 918 OX=1338519 GN=dnaK PE=2 SV=1	6	4	4	13.6	8.7	8.7	65.583	609	0.00036058	5.8378	By matching	By matching	By matching	By matching	By matching	By matching											By matching	By matching	By matching	99397000	0	0	0	670410	922050	0	0	0
A0A059N106	unreviewed	Fructose-1,6-bisphosphate aldolase, class II	HMPREF2097_01836	A0A059N106	A0A059N106	Enterococcus faecalis 918	fructose 1,6-bisphosphate metabolic process [GO:0030388]; glycolytic process [GO:0006096]		fructose-bisphosphate aldolase activity [GO:0004332]; zinc ion binding [GO:0008270]	fructose-bisphosphate aldolase activity [GO:0004332]; zinc ion binding [GO:0008270]; fructose 1,6-bisphosphate metabolic process [GO:0030388]; glycolytic process [GO:0006096]	tr|A0A059N106|A0A059N106_ENTFL Fructose-1,6-bisphosphate aldolase, class II OS=Enterococcus faecalis 918 OX=1338519 GN=HMPREF2097_01836 PE=3 SV=1	7	7	7	42.6	42.6	42.6	30.813	289	0	126.84					By matching					By matching			By matching				By matching	By matching	By matching	831710000	0	0	0	0	1030500	0	0	0
A0A059N108	unreviewed	SPFH/Band 7/PHB domain protein	HMPREF2097_01995	A0A059N108	A0A059N108	Enterococcus faecalis 918					tr|A0A059N108|A0A059N108_ENTFL SPFH/Band 7/PHB domain protein OS=Enterococcus faecalis 918 OX=1338519 GN=HMPREF2097_01995 PE=4 SV=1	5	5	5	14.3	14.3	14.3	53.822	489	0.00019044	20.869				By MS/MS	By MS/MS	By matching	By MS/MS	By MS/MS	By MS/MS	By matching		By MS/MS							By matching	195460000	0	0	0	1247200	1431400	1089500	7384600	8142200
A0A059N1H3	unreviewed	50S ribosomal protein L7/L12	rplL HMPREF2097_01741	A0A059N1H3	A0A059N1H3	Enterococcus faecalis 918	translation [GO:0006412]	ribosome [GO:0005840]	structural constituent of ribosome [GO:0003735]	ribosome [GO:0005840]; structural constituent of ribosome [GO:0003735]; translation [GO:0006412]	tr|A0A059N1H3|A0A059N1H3_ENTFL 50S ribosomal protein L7/L12 OS=Enterococcus faecalis 918 OX=1338519 GN=rplL PE=3 SV=1	2	2	2	18.9	18.9	18.9	12.396	122	0.0036131	2.076					By matching						By matching	By MS/MS			By matching					463560000	0	0	0	0	1160500	0	0	0
A0A059N1I1	unreviewed	Dihydrolipoamide acetyltransferase component of pyruvate dehydrogenase complex (EC 2.3.1.-)	HMPREF2097_02029	A0A059N1I1	A0A059N1I1	Enterococcus faecalis 918			transferase activity, transferring acyl groups [GO:0016746]	transferase activity, transferring acyl groups [GO:0016746]	tr|A0A059N1I1|A0A059N1I1_ENTFL Dihydrolipoamide acetyltransferase component of pyruvate dehydrogenase complex OS=Enterococcus faecalis 918 OX=1338519 GN=HMPREF2097_02029 PE=3 SV=1	6	6	6	23.9	23.9	23.9	56.676	539	0.00018054	18.194			By matching	By matching	By matching															313080000	0	0	489750	236180	448120	0	0	0
A0A059N1V5	unreviewed	Major cold shock protein CspA	HMPREF2097_01614	A0A059N1V5;A0A1X8VA57	A0A059N1V5	Enterococcus faecalis 918		cytoplasm [GO:0005737]	nucleic acid binding [GO:0003676]	cytoplasm [GO:0005737]; nucleic acid binding [GO:0003676]	tr|A0A059N1V5|A0A059N1V5_ENTFL Major cold shock protein CspA OS=Enterococcus faecalis 918 OX=1338519 GN=HMPREF2097_01614 PE=4 SV=1	8	8	8	90.9	90.9	90.9	7.2998	66	0	323.31	By matching		By matching	By matching	By matching	By matching	By matching		By matching	By matching	By matching	By matching	By matching	By matching		By matching	By matching			18551000000	1027200	0	1335100	3634000	1566200	5309300	1328500	0
A0A059N1Z6	unreviewed	Phosphocarrier protein HPr	HMPREF2097_01540	A0A059N1Z6	A0A059N1Z6	Enterococcus faecalis 918	phosphoenolpyruvate-dependent sugar phosphotransferase system [GO:0009401]	cytoplasm [GO:0005737]		cytoplasm [GO:0005737]; phosphoenolpyruvate-dependent sugar phosphotransferase system [GO:0009401]	tr|A0A059N1Z6|A0A059N1Z6_ENTFL Phosphocarrier protein HPr OS=Enterococcus faecalis 918 OX=1338519 GN=HMPREF2097_01540 PE=4 SV=1	1	1	1	11.4	11.4	11.4	9.3205	88	0.0030519	2.1397	By matching			By MS/MS	By matching		By matching	By matching	By matching	By matching			By matching							117880000	958930	0	0	4937700	3178000	0	5644200	1618700
A0A059N225	unreviewed	UPF0342 protein HMPREF2097_01570	HMPREF2097_01570	A0A059N225	A0A059N225	Enterococcus faecalis 918					tr|A0A059N225|A0A059N225_ENTFL UPF0342 protein HMPREF2097_01570 OS=Enterococcus faecalis 918 OX=1338519 GN=HMPREF2097_01570 PE=3 SV=1	4	4	4	42.5	42.5	42.5	13.136	113	0	71.406	By matching			By MS/MS	By MS/MS	By MS/MS	By matching	By matching	By matching	By matching	By matching	By matching	By matching	By matching		By matching		By matching	By matching	361700000	448130	0	0	7499400	9826100	6020000	3983500	2382100
A0A059N2L7	unreviewed	Aspartyl/glutamyl-tRNA(Asn/Gln) amidotransferase subunit C (Asp/Glu-ADT subunit C) (EC 6.3.5.-)	gatC HMPREF2097_01526	A0A059N2L7	A0A059N2L7	Enterococcus faecalis 918	regulation of translational fidelity [GO:0006450]; translation [GO:0006412]		ATP binding [GO:0005524]; glutaminyl-tRNA synthase (glutamine-hydrolyzing) activity [GO:0050567]; transferase activity [GO:0016740]	ATP binding [GO:0005524]; glutaminyl-tRNA synthase (glutamine-hydrolyzing) activity [GO:0050567]; transferase activity [GO:0016740]; regulation of translational fidelity [GO:0006450]; translation [GO:0006412]	tr|A0A059N2L7|A0A059N2L7_ENTFL Aspartyl/glutamyl-tRNA(Asn/Gln) amidotransferase subunit C OS=Enterococcus faecalis 918 OX=1338519 GN=gatC PE=3 SV=1	3	3	3	52.8	52.8	52.8	12.088	108	0.00027473	8.3768							By matching	By matching	By matching											125600000	0	0	0	0	0	0	291870	1160000
A0A059N2S0	unreviewed	Uncharacterized protein	HMPREF2097_01586	A0A059N2S0	A0A059N2S0	Enterococcus faecalis 918					tr|A0A059N2S0|A0A059N2S0_ENTFL Uncharacterized protein OS=Enterococcus faecalis 918 OX=1338519 GN=HMPREF2097_01586 PE=4 SV=1	5	5	5	86	86	86	6.6704	57	0	323.31			By matching	By MS/MS	By MS/MS	By MS/MS					By matching		By matching				By matching			13262000000	0	0	2545300	14314000	8603500	1037500	0	0
A0A059N317	unreviewed	Protein RecA (Recombinase A)	recA HMPREF2097_01315	A0A059N317	A0A059N317	Enterococcus faecalis 918	DNA recombination [GO:0006310]; DNA repair [GO:0006281]; SOS response [GO:0009432]	cytoplasm [GO:0005737]	ATP binding [GO:0005524]; damaged DNA binding [GO:0003684]; DNA-dependent ATPase activity [GO:0008094]; single-stranded DNA binding [GO:0003697]	cytoplasm [GO:0005737]; ATP binding [GO:0005524]; damaged DNA binding [GO:0003684]; DNA-dependent ATPase activity [GO:0008094]; single-stranded DNA binding [GO:0003697]; DNA recombination [GO:0006310]; DNA repair [GO:0006281]; SOS response [GO:0009432]	tr|A0A059N317|A0A059N317_ENTFL Protein RecA OS=Enterococcus faecalis 918 OX=1338519 GN=recA PE=3 SV=1	2	2	2	7.8	7.8	7.8	37.409	348	0.0004263	4.1445				By matching		By matching				By matching			By matching							738010000	0	0	0	1185600	0	9245000	0	0
A0A059N414	unreviewed	Pyruvate, phosphate dikinase (EC 2.7.9.1)	HMPREF2097_00919	A0A059N414	A0A059N414	Enterococcus faecalis 918	pyruvate metabolic process [GO:0006090]		ATP binding [GO:0005524]; kinase activity [GO:0016301]; metal ion binding [GO:0046872]; pyruvate, phosphate dikinase activity [GO:0050242]	ATP binding [GO:0005524]; kinase activity [GO:0016301]; metal ion binding [GO:0046872]; pyruvate, phosphate dikinase activity [GO:0050242]; pyruvate metabolic process [GO:0006090]	tr|A0A059N414|A0A059N414_ENTFL Pyruvate, phosphate dikinase OS=Enterococcus faecalis 918 OX=1338519 GN=HMPREF2097_00919 PE=3 SV=1	3	2	2	4.2	2.8	2.8	99.291	881	0.009537	1.5734	By matching	By matching	By matching	By matching	By matching	By matching	By matching	By matching	By matching	By matching	By matching	By matching	By matching	By matching						185580000	0	0	0	0	0	0	0	0
A0A059N464	unreviewed	Cell division protein FtsZ	ftsZ HMPREF2097_00892	A0A059N464	A0A059N464	Enterococcus faecalis 918	division septum assembly [GO:0000917]; FtsZ-dependent cytokinesis [GO:0043093]; protein polymerization [GO:0051258]	cell division site [GO:0032153]; cytoplasm [GO:0005737]	GTPase activity [GO:0003924]; GTP binding [GO:0005525]	cell division site [GO:0032153]; cytoplasm [GO:0005737]; GTP binding [GO:0005525]; GTPase activity [GO:0003924]; division septum assembly [GO:0000917]; FtsZ-dependent cytokinesis [GO:0043093]; protein polymerization [GO:0051258]	tr|A0A059N464|A0A059N464_ENTFL Cell division protein FtsZ OS=Enterococcus faecalis 918 OX=1338519 GN=ftsZ PE=3 SV=1	4	4	4	16.1	16.1	16.1	44.147	410	0	43.792							By matching		By matching			By matching	By matching		By matching					168370000	0	0	0	0	0	0	521680	0
A0A059N4T6	unreviewed	DUF4097 domain-containing protein	HMPREF2097_00764	A0A059N4T6	A0A059N4T6	Enterococcus faecalis 918					tr|A0A059N4T6|A0A059N4T6_ENTFL Uncharacterized protein OS=Enterococcus faecalis 918 OX=1338519 GN=HMPREF2097_00764 PE=4 SV=1	4	4	4	8.9	8.9	8.9	62.794	561	0.00042817	4.189	By matching	By matching	By MS/MS	By MS/MS	By MS/MS	By MS/MS					By matching	By MS/MS					By matching	By matching		35395000	1039100	1337900	5154800	6227300	6179500	4291700	0	0
A0A059N5V5	unreviewed	Formate acetyltransferase (EC 2.3.1.54) (Pyruvate formate-lyase)	HMPREF2097_00093	A0A059N5V5	A0A059N5V5	Enterococcus faecalis 918	glucose metabolic process [GO:0006006]	cytoplasm [GO:0005737]	formate C-acetyltransferase activity [GO:0008861]	cytoplasm [GO:0005737]; formate C-acetyltransferase activity [GO:0008861]; glucose metabolic process [GO:0006006]	tr|A0A059N5V5|A0A059N5V5_ENTFL Formate C-acetyltransferase OS=Enterococcus faecalis 918 OX=1338519 GN=HMPREF2097_00093 PE=4 SV=1	29	29	29	55.2	55.2	55.2	84.587	748	0	182.49	By matching	By matching	By matching		By MS/MS	By matching	By matching		By matching	By matching	By matching	By matching	By matching		By matching	By matching	By matching			1719100000	1229200	2433700	901170	0	6718000	2545400	1456700	0
A0A059N612	unreviewed	DNA-binding protein HU	HMPREF2097_00153	A0A059N612	A0A059N612	Enterococcus faecalis 918	chromosome condensation [GO:0030261]		DNA binding [GO:0003677]	DNA binding [GO:0003677]; chromosome condensation [GO:0030261]	tr|A0A059N612|A0A059N612_ENTFL DNA-binding protein HU-beta OS=Enterococcus faecalis 918 OX=1338519 GN=HMPREF2097_00153 PE=3 SV=1	5	4	4	67	53.8	53.8	9.656	91	0	323.31	By MS/MS	By MS/MS	By MS/MS	By MS/MS	By MS/MS	By MS/MS	By matching	By matching		By matching	By MS/MS	By MS/MS	By MS/MS				By matching	By matching		1583500000	15160000	9357900	19796000	15432000	29344000	32694000	435990	1323600
A0A061BMN4	unreviewed	RHTO0S24e01772g1_1	RHTO0S_24e01772g	A0A061BMN4;M7WFX0;A0A120E8B7;A0A0K3CLB2;A0A194SG80;A0A2S5BAS6;A0A099NX08	A0A061BMN4;M7WFX0;A0A120E8B7;A0A0K3CLB2;A0A194SG80;A0A2S5BAS6	Rhodosporidium toruloides (Yeast) (Rhodotorula gracilis)			ATP binding [GO:0005524]; protein kinase activity [GO:0004672]	ATP binding [GO:0005524]; protein kinase activity [GO:0004672]	tr|A0A061BMN4|A0A061BMN4_RHOTO Non-specific serine/threonine protein kinase OS=Rhodosporidium toruloides OX=5286 GN=RHTO0S_24e01772g PE=4 SV=1;tr|M7WFX0|M7WFX0_RHOT1 Non-specific serine/threonine protein kinase OS=Rhodosporidium toruloides (strain NP11) OX	3	2	2	5.3	3.4	3.4	95.01	863	0.0093002	1.6098											By matching	By matching	By matching					By matching		230950000	0	0	0	0	0	0	0	0
A0A073JJQ3	unreviewed	Pyruvate kinase (EC 2.7.1.40)	pyk A4V07_02405 ADV92_01555 BFD03_00785 BHL82_04075 BHL83_01440 BHL89_02240 C5O77_02070 C6H63_05405 CBF96_10460 CBG24_00135 DB325_09180 DKZ26_08590 DKZ35_01430 DL317_01925 DPH67_06460 EW144_10025 GIX51_01265 GIX74_02040 GIX80_03640 GIX83_00475 HF82_00585 LR3_09605	A0A073JJQ3	A0A073JJQ3	Lactobacillus reuteri			ATP binding [GO:0005524]; kinase activity [GO:0016301]; magnesium ion binding [GO:0000287]; potassium ion binding [GO:0030955]; pyruvate kinase activity [GO:0004743]	ATP binding [GO:0005524]; kinase activity [GO:0016301]; magnesium ion binding [GO:0000287]; potassium ion binding [GO:0030955]; pyruvate kinase activity [GO:0004743]	tr|A0A073JJQ3|A0A073JJQ3_LACRE Pyruvate kinase OS=Lactobacillus reuteri OX=1598 GN=pyk PE=3 SV=1	25	25	25	66.8	66.8	66.8	51.825	473	0	323.31	By MS/MS	By MS/MS	By MS/MS	By MS/MS	By MS/MS	By matching	By matching	By matching	By matching	By matching	By MS/MS	By MS/MS	By matching	By matching	By matching		By matching	By matching		10917000000	17082000	15242000	10700000	14293000	9823000	9542000	2248000	3717200
A0A073JK64	unreviewed	30S ribosomal protein S16	rpsP A4V07_04125 ADV92_10630 B1A73_03220 B2G46_06125 B5D07_06015 B5F04_01420 B5G22_01180 BBP13_05310 BFD03_05220 BHL82_01900 BHL83_04055 BHL89_01260 C5O77_03225 C6H63_09030 CBF96_05300 CBG21_07565 CBG24_08475 DB324_02715 DB325_03195 DKZ23_05585 DKZ26_09075 DKZ35_04065 DL317_00345 DPH67_04530 E5337_03805 EW144_01770 FOD75_04035 GIX51_05810 GIX72_08345 GIX73_03840 GIX74_05630 GIX80_02750 GIX81_0588…	A0A073JK64	A0A073JK64	Lactobacillus reuteri	translation [GO:0006412]	ribosome [GO:0005840]	structural constituent of ribosome [GO:0003735]	ribosome [GO:0005840]; structural constituent of ribosome [GO:0003735]; translation [GO:0006412]	tr|A0A073JK64|A0A073JK64_LACRE 30S ribosomal protein S16 OS=Lactobacillus reuteri OX=1598 GN=rpsP PE=3 SV=1	3	2	2	37.4	29.7	29.7	10.449	91	0.00044868	4.7934		By MS/MS			By MS/MS			By matching		By matching	By MS/MS									179270000	0	1501200	0	0	1157100	0	0	743140
A0A073JKC9	unreviewed	50S ribosomal protein L20	rplT A4V07_04575 B1A73_03975 B2G46_06870 B5F04_06150 B5G22_07680 BFD03_08225 C5O77_02795 C6H63_09460 CBF96_06625 CBG21_04345 CBG24_06430 DB324_02290 DB325_02765 DKZ23_03025 DKZ26_03835 DKZ35_01070 DL317_10125 E5337_03180 FOD75_03600 GIX51_04405 GIX72_04565 GIX73_04270 GIX74_06990 GIX80_01805 GIX81_10260 GIX83_04455 HF82_02260 LR3_00855 LRLP16767_LR202_01490 LWHH1689_1379	A0A073JKC9	A0A073JKC9	Lactobacillus reuteri	ribosomal large subunit assembly [GO:0000027]; translation [GO:0006412]	ribosome [GO:0005840]	rRNA binding [GO:0019843]; structural constituent of ribosome [GO:0003735]	ribosome [GO:0005840]; rRNA binding [GO:0019843]; structural constituent of ribosome [GO:0003735]; ribosomal large subunit assembly [GO:0000027]; translation [GO:0006412]	tr|A0A073JKC9|A0A073JKC9_LACRE 50S ribosomal protein L20 OS=Lactobacillus reuteri OX=1598 GN=rplT PE=3 SV=1	1	1	1	12	12	12	13.545	117	0.0013749	2.7098	By matching	By matching		By MS/MS	By matching									By matching						129800000	1997500	2410600	0	1755700	765730	0	0	0
A0A073JLT6	unreviewed	Alcohol dehydrogenase (Alcohol dehydrogenase catalytic domain-containing protein) (Sorbitol dehydrogenase) (EC 1.1.1.14) (Zinc-dependent alcohol dehydrogenase family protein)	A4V07_07605 ADV92_06540 B1A73_07010 B2G46_09670 B5D07_09535 B5F04_07025 B5G22_06170 BBP13_09565 BFD03_05655 BHL82_06560 BHL83_07055 BHL89_09895 C5O77_05130 C6H63_00925 CBF96_07550 CBG24_01705 DB324_07245 DB325_03500 DL317_06760 DPH67_00820 E5337_06810 FOD75_10255 GIX72_02610 GIX73_07335 GIX74_03000 GIX80_00460 GIX81_00515 GIX82_01520 GIX83_01280 HF82_07080 LR3_05045 LRLP16767_LR202_00402	A0A073JLT6	A0A073JLT6	Lactobacillus reuteri			L-iditol 2-dehydrogenase activity [GO:0003939]; zinc ion binding [GO:0008270]	L-iditol 2-dehydrogenase activity [GO:0003939]; zinc ion binding [GO:0008270]	tr|A0A073JLT6|A0A073JLT6_LACRE Alcohol dehydrogenase OS=Lactobacillus reuteri OX=1598 GN=A4V07_07605 PE=3 SV=1	5	5	5	30.4	30.4	30.4	35.976	336	0.00018041	18.161	By MS/MS	By MS/MS	By MS/MS	By MS/MS	By matching															244820000	2019100	4163300	1155800	977910	922340	0	0	0
A0A073JM84	unreviewed	30S ribosomal protein S1 (SSU ribosomal protein S1p)	rpsA A4V07_02465 B1A73_00535 B2G46_04540 B5F04_04820 B5G22_04100 BBP13_06865 BFD03_00725 C5O77_02130 C6H63_05345 CBF96_10520 CBG21_01115 CBG24_00195 DB324_04240 DB325_04110 DKZ26_01635 DKZ35_01370 E5337_07150 EW144_10085 FOD75_05875 GIX51_01325 GIX72_00375 GIX73_00910 GIX74_01980 GIX80_03580 GIX81_02140 GIX83_00415 HF82_00525 LR3_09665 LRLP16767_LR202_00693	A0A073JM84	A0A073JM84	Lactobacillus reuteri		ribosome [GO:0005840]	rRNA binding [GO:0019843]	ribosome [GO:0005840]; rRNA binding [GO:0019843]	tr|A0A073JM84|A0A073JM84_LACRE 30S ribosomal protein S1 OS=Lactobacillus reuteri OX=1598 GN=rpsA PE=4 SV=1	12	12	12	42.5	42.5	42.5	45.995	416	0	25.023	By matching	By matching	By matching		By matching						By matching	By matching			By matching		By matching			928970000	1616100	2030500	3186200	0	2272400	0	0	0
A0A073JMM2	unreviewed	50S ribosomal protein L17	rplQ A4V07_05625 ADV92_08620 B1A73_02150 B2G46_07860 B5D07_07580 B5F04_04240 B5G22_03475 BBP13_01735 BFD03_07215 BHL82_07870 BHL83_02425 BHL89_08630 C5O77_07415 C6H63_07130 CBF96_06905 CBG21_06955 CBG24_08135 DKZ26_00190 DKZ35_07655 DL317_08760 DPH67_02425 E5337_08570 EW144_03375 FOD75_02395 GIX51_03225 GIX72_06475 GIX73_00145 GIX74_03825 GIX80_09210 GIX83_06100 HF82_04490 LR3_07520	A0A073JMM2	A0A073JMM2	Lactobacillus reuteri	translation [GO:0006412]	ribosome [GO:0005840]	structural constituent of ribosome [GO:0003735]	ribosome [GO:0005840]; structural constituent of ribosome [GO:0003735]; translation [GO:0006412]	tr|A0A073JMM2|A0A073JMM2_LACRE 50S ribosomal protein L17 OS=Lactobacillus reuteri OX=1598 GN=rplQ PE=3 SV=1	3	3	3	28.3	28.3	28.3	14.201	127	0	30.373				By MS/MS				By matching		By matching	By matching	By matching								179640000	0	0	0	1144300	0	0	0	20172
A0A073JN20	unreviewed	Elongation factor P (EF-P)	efp A4V07_06330 ADV92_07895 B1A73_05135 B2G46_08600 B5D07_08395 B5F04_10790 B5G22_00715 BBP13_06335 BFD03_03265 BHL82_10685 BHL83_09345 BHL89_09525 C5O77_03640 CBF96_08040 CBG21_06710 CBG24_01435 DB324_08430 DB325_10420 DKZ23_10805 DKZ26_08440 DKZ35_08495 DL317_07940 E5337_06445 EW144_04035 FOD75_01600 GIX51_03320 GIX72_07555 GIX73_07925 GIX74_08545 GIX80_06270 GIX81_02055 GIX83_01705 HF82_10160 …	A0A073JN20	A0A073JN20	Lactobacillus reuteri		cytoplasm [GO:0005737]	translation elongation factor activity [GO:0003746]	cytoplasm [GO:0005737]; translation elongation factor activity [GO:0003746]	tr|A0A073JN20|A0A073JN20_LACRE Elongation factor P OS=Lactobacillus reuteri OX=1598 GN=efp PE=3 SV=1	5	5	5	53	53	53	20.518	185	0.00028413	9.2654			By matching	By matching	By matching															167260000	0	0	4629700	4295400	982790	0	0	0
A0A073JNE5	unreviewed	50S ribosomal protein L10	rplJ A4V07_00030 ADV92_04340 B1A73_08705 B2G46_01860 B5D07_01915 BBP13_00290 BFD03_04580 BHL83_08380 BHL89_08340 C5O77_07785 C6H63_00230 CBF96_03755 CBG21_02515 CBG24_00700 DB324_05320 DB325_01515 DKZ23_09080 DKZ26_03055 DKZ35_01820 DL317_04515 DPH67_09080 E5337_10115 EW144_07565 FOD75_09010 GIX51_00035 GIX72_06760 GIX73_02395 GIX74_01015 GIX80_04580 GIX81_04870 HF82_05240 LR3_02315 LRLP16767_LR2…	A0A073JNE5	A0A073JNE5	Lactobacillus reuteri	ribosome biogenesis [GO:0042254]; translation [GO:0006412]	large ribosomal subunit [GO:0015934]	large ribosomal subunit rRNA binding [GO:0070180]; structural constituent of ribosome [GO:0003735]	large ribosomal subunit [GO:0015934]; large ribosomal subunit rRNA binding [GO:0070180]; structural constituent of ribosome [GO:0003735]; ribosome biogenesis [GO:0042254]; translation [GO:0006412]	tr|A0A073JNE5|A0A073JNE5_LACRE 50S ribosomal protein L10 OS=Lactobacillus reuteri OX=1598 GN=rplJ PE=3 SV=1	8	8	8	68.1	68.1	68.1	18.139	166	0	86.76		By MS/MS		By matching	By MS/MS			By matching			By MS/MS	By matching	By matching							499090000	0	339260	0	2431800	1263400	0	0	764070
A0A073JNQ8	unreviewed	Glyceraldehyde-3-phosphate dehydrogenase	gap gapA A4V07_00450 ADV92_03945 B1A73_00955 B2G46_02265 B5D07_11285 B5F04_05420 B5G22_04605 BBP13_10240 BFD03_04970 BHL82_04320 BHL83_02035 BHL89_03725 C5O77_08185 C6H63_10725 CBF96_01180 CBG21_01250 CBG24_03420 DB324_09095 DB325_01115 DKZ23_08570 DKZ26_03290 DKZ35_10825 DL317_04100 DPH67_08620 E5337_01635 EW144_07975 FOD75_08590 GIX51_00430 GIX72_02310 GIX73_02800 GIX74_00615 GIX80_04975 GIX81_…	A0A073JNQ8	A0A073JNQ8	Lactobacillus reuteri	glucose metabolic process [GO:0006006]		NAD binding [GO:0051287]; NADP binding [GO:0050661]; oxidoreductase activity, acting on the aldehyde or oxo group of donors, NAD or NADP as acceptor [GO:0016620]	NAD binding [GO:0051287]; NADP binding [GO:0050661]; oxidoreductase activity, acting on the aldehyde or oxo group of donors, NAD or NADP as acceptor [GO:0016620]; glucose metabolic process [GO:0006006]	tr|A0A073JNQ8|A0A073JNQ8_LACRE Glyceraldehyde-3-phosphate dehydrogenase OS=Lactobacillus reuteri OX=1598 GN=gap PE=3 SV=1	15	13	13	54	48.1	48.1	35.993	335	0	323.31	By MS/MS	By MS/MS	By MS/MS	By MS/MS	By MS/MS	By MS/MS	By MS/MS	By matching	By matching	By matching	By MS/MS	By MS/MS	By MS/MS	By matching	By matching	By matching	By matching		By matching	13868000000	40510000	42964000	30063000	28267000	29927000	9876400	1074300	0
A0A073JNW1	unreviewed	Arginine deiminase (ADI) (EC 3.5.3.6) (Arginine dihydrolase) (AD)	arcA A4V07_00800 B5D07_02700 BBP13_01130 BHL82_06735 BHL83_07800 BHL89_06625 C5O77_05860 DB325_00615 DKZ26_05975 DKZ35_09630 DPH67_08340 EW144_08305 GIX74_00200 HF82_05910 LR3_03045 LWHH1689_0545	A0A073JNW1	A0A073JNW1	Lactobacillus reuteri	arginine catabolic process to ornithine [GO:0019547]	cytoplasm [GO:0005737]	arginine deiminase activity [GO:0016990]	cytoplasm [GO:0005737]; arginine deiminase activity [GO:0016990]; arginine catabolic process to ornithine [GO:0019547]	tr|A0A073JNW1|A0A073JNW1_LACRE Arginine deiminase OS=Lactobacillus reuteri OX=1598 GN=arcA PE=3 SV=1	14	14	14	52.7	52.7	52.7	46.242	410	0	106.03	By MS/MS	By MS/MS	By matching	By matching	By matching	By matching	By matching	By matching		By matching	By matching	By matching	By matching	By matching						2785200000	11959000	10378000	3478400	1820600	3776000	796210	1932400	1640800
A0A073JNY5	unreviewed	ATP synthase subunit alpha (EC 7.1.2.2) (ATP synthase F1 sector subunit alpha) (F-ATPase subunit alpha)	atpA A4V07_00905 ADV92_03415 BHL82_08405 BHL83_05140 BHL89_08745 C5O77_05965 C6H63_10335 CBF96_04105 CBG21_05575 CBG24_02995 DB325_00510 DKZ23_01070 DKZ26_06080 DKZ35_10275 DL317_03630 DPH67_08235 E5337_07910 EW144_08410 GIX51_00950 GIX74_00095 GIX81_03885 GIX83_06670 HF82_06015 LR3_03150	A0A073JNY5	A0A073JNY5	Lactobacillus reuteri		plasma membrane [GO:0005886]; proton-transporting ATP synthase complex, catalytic core F(1) [GO:0045261]	ATP binding [GO:0005524]; hydrolase activity [GO:0016787]; proton-transporting ATPase activity, rotational mechanism [GO:0046961]; proton-transporting ATP synthase activity, rotational mechanism [GO:0046933]	plasma membrane [GO:0005886]; proton-transporting ATP synthase complex, catalytic core F(1) [GO:0045261]; ATP binding [GO:0005524]; hydrolase activity [GO:0016787]; proton-transporting ATP synthase activity, rotational mechanism [GO:0046933]; proton-transporting ATPase activity, rotational mechanism [GO:0046961]	tr|A0A073JNY5|A0A073JNY5_LACRE ATP synthase subunit alpha OS=Lactobacillus reuteri OX=1598 GN=atpA PE=3 SV=1	14	11	13	38.7	37.3	32.8	55.226	509	0	107.96	By MS/MS	By MS/MS	By MS/MS	By MS/MS	By MS/MS	By MS/MS	By MS/MS	By MS/MS	By MS/MS	By MS/MS	By MS/MS	By MS/MS	By MS/MS	By MS/MS	By MS/MS	By MS/MS	By MS/MS	By MS/MS	By MS/MS	1771400000	29133000	32989000	30580000	20716000	16522000	18690000	8157900	8354200
A0A073JNZ6	unreviewed	Glucose-6-phosphate 1-dehydrogenase (G6PD) (EC 1.1.1.49)	zwf A4V07_07090 B2G46_09200 BBP13_03565 BFD03_09070 BHL83_01145 C5O77_04665 C6H63_02890 CBF96_00265 CBG24_05595 DB325_04040 DKZ26_00710 DKZ35_04370 DL317_07260 DPH67_01320 FOD75_09735 GIX51_09555 GIX72_03065 GIX73_06835 GIX74_02845 GIX80_08755 GIX83_01020 HF82_07575 LR3_04335 LWHH1689_1997	A0A073JNZ6	A0A073JNZ6	Lactobacillus reuteri	glucose metabolic process [GO:0006006]; pentose-phosphate shunt [GO:0006098]		glucose-6-phosphate dehydrogenase activity [GO:0004345]; NADP binding [GO:0050661]	glucose-6-phosphate dehydrogenase activity [GO:0004345]; NADP binding [GO:0050661]; glucose metabolic process [GO:0006006]; pentose-phosphate shunt [GO:0006098]	tr|A0A073JNZ6|A0A073JNZ6_LACRE Glucose-6-phosphate 1-dehydrogenase OS=Lactobacillus reuteri OX=1598 GN=zwf PE=3 SV=1	16	16	16	48.1	48.1	48.1	56.374	493	0	323.31							By matching	By matching	By matching	By matching			By matching						By matching	2652800000	0	0	0	0	0	0	3216700	6956000
A0A073JP29	unreviewed	D-alanine--D-alanine ligase (EC 6.3.2.4) (D-Ala-D-Ala ligase) (D-alanylalanine synthetase)	ddl A4V07_00955 DB325_00455 LR3_03200	A0A073JP29	A0A073JP29	Lactobacillus reuteri	cell wall organization [GO:0071555]; peptidoglycan biosynthetic process [GO:0009252]; regulation of cell shape [GO:0008360]	cytoplasm [GO:0005737]	ATP binding [GO:0005524]; D-alanine-D-alanine ligase activity [GO:0008716]; metal ion binding [GO:0046872]	cytoplasm [GO:0005737]; ATP binding [GO:0005524]; D-alanine-D-alanine ligase activity [GO:0008716]; metal ion binding [GO:0046872]; cell wall organization [GO:0071555]; peptidoglycan biosynthetic process [GO:0009252]; regulation of cell shape [GO:0008360]	tr|A0A073JP29|A0A073JP29_LACRE D-alanine--D-alanine ligase OS=Lactobacillus reuteri OX=1598 GN=ddl PE=3 SV=1	11	11	11	47.4	47.4	47.4	42.538	378	0	79.988				By matching				By matching	By matching	By matching	By matching	By matching								1502000000	0	0	0	1228100	0	0	0	1115600
A0A073JP53	unreviewed	6-phosphogluconate dehydrogenase, decarboxylating (EC 1.1.1.44)	gndA A4V07_07095 B2G46_09205 BBP13_03570 BFD03_09075 BHL83_01140 C5O77_04670 C6H63_02895 CBG21_11065 DB325_04035 DKZ26_00715 DKZ35_04365 DL317_07255 DPH67_01315 EW144_04965 GIX72_03060 GIX73_06840 GIX74_02850 GIX81_04595 GIX83_01025 HF82_07570 LR3_04330	A0A073JP53;A0A059N592	A0A073JP53	Lactobacillus reuteri	D-gluconate metabolic process [GO:0019521]; pentose-phosphate shunt [GO:0006098]		NADP binding [GO:0050661]; phosphogluconate dehydrogenase (decarboxylating) activity [GO:0004616]	NADP binding [GO:0050661]; phosphogluconate dehydrogenase (decarboxylating) activity [GO:0004616]; D-gluconate metabolic process [GO:0019521]; pentose-phosphate shunt [GO:0006098]	tr|A0A073JP53|A0A073JP53_LACRE 6-phosphogluconate dehydrogenase, decarboxylating OS=Lactobacillus reuteri OX=1598 GN=gndA PE=3 SV=1	23	23	23	62.1	62.1	62.1	53.417	478	0	323.31	By MS/MS	By MS/MS	By MS/MS	By MS/MS	By MS/MS	By matching	By matching	By matching	By matching	By matching	By matching	By matching	By matching		By matching		By matching		By matching	4936200000	22259000	23386000	31415000	17564000	16259000	6536700	1297100	3168800
A0A073JQ11	unreviewed	50S ribosomal protein L4	rplD A4V07_05755 ADV92_08490 B1A73_02280 B2G46_07990 B5D07_07710 B5F04_04370 B5G22_03345 BBP13_01865 BFD03_07345 BHL82_07740 BHL83_02295 BHL89_08500 C5O77_07285 C6H63_07260 CBF96_06775 CBG21_07085 CBG24_08265 DB324_00095 DKZ23_00655 DKZ26_00060 DKZ35_07525 DPH67_02295 E5337_08700 EW144_03505 FOD75_02265 GIX51_03095 GIX72_06345 GIX73_00275 GIX80_09080 GIX81_06710 GIX83_05970 HF82_04620 LR3_07650 L…	A0A073JQ11	A0A073JQ11	Lactobacillus reuteri	translation [GO:0006412]	ribosome [GO:0005840]	rRNA binding [GO:0019843]; structural constituent of ribosome [GO:0003735]	ribosome [GO:0005840]; rRNA binding [GO:0019843]; structural constituent of ribosome [GO:0003735]; translation [GO:0006412]	tr|A0A073JQ11|A0A073JQ11_LACRE 50S ribosomal protein L4 OS=Lactobacillus reuteri OX=1598 GN=rplD PE=3 SV=1	7	7	7	55.1	55.1	55.1	22.29	207	0	72.741	By MS/MS	By matching	By matching	By matching	By matching	By matching				By matching		By matching								277260000	6793100	5239600	3277400	2837200	3373800	5130300	0	0
A0A073JQ83	unreviewed	30S ribosomal protein S10	rpsJ A4V07_05765 B1A73_02290 B2G46_08000 B5F04_04380 B5G22_03335 BBP13_01875 C5O77_07275 C6H63_07270 CBF96_06765 CBG21_07095 CBG24_08275 DB325_08215 DKZ23_00645 DKZ26_00050 DKZ35_07515 DL317_08620 E5337_08710 EW144_03515 FOD75_02255 GIX51_03085 GIX72_06335 GIX73_00285 GIX80_09070 GIX81_06720 GIX83_05960 HF82_04630 LR3_07660 LRLP16767_LR202_00072	A0A073JQ83	A0A073JQ83	Lactobacillus reuteri	translation [GO:0006412]	ribosome [GO:0005840]	structural constituent of ribosome [GO:0003735]; tRNA binding [GO:0000049]	ribosome [GO:0005840]; structural constituent of ribosome [GO:0003735]; tRNA binding [GO:0000049]; translation [GO:0006412]	tr|A0A073JQ83|A0A073JQ83_LACRE 30S ribosomal protein S10 OS=Lactobacillus reuteri OX=1598 GN=rpsJ PE=3 SV=1	4	2	4	44.1	44.1	26.5	11.777	102	0.00030525	11.319	By MS/MS	By MS/MS	By MS/MS	By matching							By matching			By matching		By matching				1896700000	3948200	1493300	2400300	2618400	0	0	0	0
A0A073JRM0	unreviewed	2,3-bisphosphoglycerate-dependent phosphoglycerate mutase (BPG-dependent PGAM) (PGAM) (Phosphoglyceromutase) (dPGM) (EC 5.4.2.11)	gpmA A4V07_08835 ADV92_05310 B1A73_03640 B2G46_00975 B5D07_00910 B5F04_02220 B5G22_02605 BBP13_03220 BFD03_01665 BHL82_05890 BHL83_03850 BHL89_04625 C5O77_09130 CBF96_03290 CBG21_00625 CBG24_00395 DKZ26_05080 DKZ35_08865 DL317_05420 DPH67_10060 E5337_02635 EW144_06640 FOD75_00750 GIX51_08560 GIX73_01660 GIX80_08365 GIX81_07625 GIX83_09765 HF82_09235 LR3_10240	A0A073JRM0	A0A073JRM0	Lactobacillus reuteri	gluconeogenesis [GO:0006094]; glycolytic process [GO:0006096]		2,3-bisphosphoglycerate-dependent phosphoglycerate mutase activity [GO:0046538]	2,3-bisphosphoglycerate-dependent phosphoglycerate mutase activity [GO:0046538]; gluconeogenesis [GO:0006094]; glycolytic process [GO:0006096]	tr|A0A073JRM0|A0A073JRM0_LACRE 2,3-bisphosphoglycerate-dependent phosphoglycerate mutase OS=Lactobacillus reuteri OX=1598 GN=gpmA PE=3 SV=1	7	6	7	47.8	47.8	43.4	26.121	228	0.00017705	17.458	By MS/MS	By matching	By matching	By MS/MS	By MS/MS	By MS/MS	By matching	By matching				By matching		By MS/MS	By MS/MS	By matching			By matching	603690000	16837000	12979000	10668000	13566000	9228700	12613000	3394300	2332200
A0A073K0A2	unreviewed	50S ribosomal protein L1	rplA A4V07_00010 ADV92_04365 B1A73_06510 B2G46_01840 B5D07_01895 B5F04_05925 B5G22_07805 BBP13_00270 BFD03_04560 BHL82_03325 BHL83_08400 BHL89_08360 C5O77_07760 C6H63_00210 CBF96_03735 CBG24_00680 DB324_05300 DB325_01535 DKZ23_07935 DKZ26_03075 DKZ35_01840 DL317_04535 DPH67_09100 E5337_06790 EW144_07545 FOD75_09030 GIX51_00015 GIX72_06780 GIX73_02375 GIX74_01035 GIX80_04560 GIX83_08750 HF82_05215…	A0A073K0A2	A0A073K0A2	Lactobacillus reuteri	regulation of translation [GO:0006417]; translation [GO:0006412]	large ribosomal subunit [GO:0015934]	rRNA binding [GO:0019843]; structural constituent of ribosome [GO:0003735]; tRNA binding [GO:0000049]	large ribosomal subunit [GO:0015934]; rRNA binding [GO:0019843]; structural constituent of ribosome [GO:0003735]; tRNA binding [GO:0000049]; regulation of translation [GO:0006417]; translation [GO:0006412]	tr|A0A073K0A2|A0A073K0A2_LACRE 50S ribosomal protein L1 OS=Lactobacillus reuteri OX=1598 GN=rplA PE=3 SV=1	6	4	4	34.8	25.7	25.7	24.684	230	0.00019425	22.07	By matching	By matching	By matching	By matching	By matching	By matching					By matching				By matching				By matching	306390000	1674300	1634300	1318400	1179200	1350000	0	0	0
A0A073K0A7	unreviewed	50S ribosomal protein L7/L12	rplL A4V07_00035 ADV92_04335 B2G46_01865 B5D07_01920 B5F04_11410 B5G22_11635 BBP13_00295 BFD03_04585 BHL82_03295 BHL83_08375 BHL89_08335 C5O77_07790 C6H63_00235 CBF96_03760 CBG24_00705 DB324_05325 DB325_01510 DKZ23_09075 DKZ26_03050 DKZ35_01815 DL317_04510 DPH67_09075 E5337_10110 EW144_07570 FOD75_09005 GIX72_06755 GIX73_02400 GIX74_01010 GIX80_04585 GIX81_04875 GIX83_08725 HF82_05245 LR3_02320 L…	A0A073K0A7	A0A073K0A7	Lactobacillus reuteri	translation [GO:0006412]	ribosome [GO:0005840]	structural constituent of ribosome [GO:0003735]	ribosome [GO:0005840]; structural constituent of ribosome [GO:0003735]; translation [GO:0006412]	tr|A0A073K0A7|A0A073K0A7_LACRE 50S ribosomal protein L7/L12 OS=Lactobacillus reuteri OX=1598 GN=rplL PE=3 SV=1	7	7	7	71.9	71.9	71.9	12.356	121	0	323.31	By MS/MS	By matching	By MS/MS	By MS/MS	By matching	By matching			By matching		By matching	By matching						By matching		1462000000	11774000	10868000	7394400	7742400	8521600	976520	0	0
A0A073K0T8	unreviewed	ATP synthase subunit beta (EC 7.1.2.2) (ATP synthase F1 sector subunit beta) (F-ATPase subunit beta)	atpD A4V07_00915 ADV92_03405 B1A73_01350 B2G46_02715 B5D07_02815 B5F04_08425 B5G22_07855 BBP13_01015 BFD03_02210 BHL82_08395 BHL83_05150 BHL89_08735 C5O77_05975 C6H63_10325 CBF96_04115 DB324_03210 DKZ26_06090 DKZ35_10265 DL317_03620 DPH67_08225 E5337_07900 EW144_08420 FOD75_08130 GIX51_00960 GIX73_09615 GIX74_00085 GIX80_05360 GIX83_06680 LR3_03160 LWHH1689_0569	A0A073K0T8	A0A073K0T8	Lactobacillus reuteri		plasma membrane [GO:0005886]; proton-transporting ATP synthase complex, catalytic core F(1) [GO:0045261]	ATP binding [GO:0005524]; proton-transporting ATPase activity, rotational mechanism [GO:0046961]; proton-transporting ATP synthase activity, rotational mechanism [GO:0046933]	plasma membrane [GO:0005886]; proton-transporting ATP synthase complex, catalytic core F(1) [GO:0045261]; ATP binding [GO:0005524]; proton-transporting ATP synthase activity, rotational mechanism [GO:0046933]; proton-transporting ATPase activity, rotational mechanism [GO:0046961]	tr|A0A073K0T8|A0A073K0T8_LACRE ATP synthase subunit beta OS=Lactobacillus reuteri OX=1598 GN=atpD PE=3 SV=1	20	17	17	67.4	59.4	59.4	51.631	475	0	323.31	By matching	By matching	By matching	By matching	By matching	By matching	By matching	By matching	By matching	By matching	By matching	By matching	By matching	By matching	By matching	By matching	By matching	By matching	By matching	2090600000	0	0	0	1054000	1892100	0	0	0
A0A073K197	unreviewed	Uncharacterized protein	A4V07_07560 B1A73_06545 B2G46_09625 B5F04_07070 B5G22_06125 BBP13_07660 BFD03_07730 BHL83_08785 C5O77_05085 C6H63_00970 CBF96_09710 CBG21_00315 CBG24_01750 DB325_03545 DKZ23_09730 DKZ26_06195 DKZ35_03850 DL317_06810 E5337_06855 EW144_05415 FOD75_10210 G5T19_04110 GIX51_07675 GIX72_02655 GIX73_07290 GIX74_07375 GIX80_00415 GIX81_00470 GIX82_01470 GIX83_01235 HF82_07125 LR3_05090 LRLP16767_LR202_02…	A0A073K197	A0A073K197	Lactobacillus reuteri					tr|A0A073K197|A0A073K197_LACRE Uncharacterized protein OS=Lactobacillus reuteri OX=1598 GN=A4V07_07560 PE=4 SV=1	2	2	2	52.5	52.5	52.5	7.0627	61	0	28.716			By matching	By matching	By matching		By matching			By matching										218150000	0	0	1396900	2672100	2376400	0	1192400	0
A0A073K266	unreviewed	50S ribosomal protein L29	rpmC A4V07_05720 ADV92_08525 B1A73_02245 B2G46_07955 B5D07_07675 B5F04_04335 B5G22_03380 BBP13_01830 BFD03_07310 BHL82_07775 BHL83_02330 BHL89_08535 C5O77_07320 C6H63_07225 CBF96_06810 CBG21_07050 CBG24_08230 DB324_00130 DB325_08260 DKZ23_00690 DKZ26_00095 DKZ35_07560 DL317_08665 DPH67_02330 E5337_08665 EW144_03470 FOD75_02300 GIX51_03130 GIX72_06380 GIX73_00240 GIX74_03920 GIX80_09115 GIX81_0667…	A0A073K266	A0A073K266	Lactobacillus reuteri	translation [GO:0006412]	ribosome [GO:0005840]	structural constituent of ribosome [GO:0003735]	ribosome [GO:0005840]; structural constituent of ribosome [GO:0003735]; translation [GO:0006412]	tr|A0A073K266|A0A073K266_LACRE 50S ribosomal protein L29 OS=Lactobacillus reuteri OX=1598 GN=rpmC PE=3 SV=1	1	1	1	22.1	22.1	22.1	8.0041	68	0.004908	1.9113	By matching	By MS/MS	By MS/MS	By matching	By MS/MS						By matching									138960000	1689500	2723400	1932200	2893700	2375700	0	0	0
A0A073K272	unreviewed	50S ribosomal protein L2	rplB A4V07_05745 ADV92_08500 B1A73_02270 B5D07_07700 BBP13_01855 BFD03_07335 BHL82_07750 BHL83_02305 BHL89_08510 C5O77_07295 C6H63_07250 CBG21_07075 CBG24_08255 DB325_08235 DKZ23_00665 DKZ26_00070 DL317_08640 DPH67_02305 E5337_08690 EW144_03495 FOD75_02275 GIX72_06355 GIX73_00265 GIX74_03945 GIX80_09090 GIX81_06700 GIX82_04895 GIX83_05980 HF82_04610 LR3_07640 LRLP16767_LR202_00076	A0A073K272;A0A059MWV7	A0A073K272	Lactobacillus reuteri	translation [GO:0006412]	large ribosomal subunit [GO:0015934]	rRNA binding [GO:0019843]; structural constituent of ribosome [GO:0003735]; transferase activity [GO:0016740]	large ribosomal subunit [GO:0015934]; rRNA binding [GO:0019843]; structural constituent of ribosome [GO:0003735]; transferase activity [GO:0016740]; translation [GO:0006412]	tr|A0A073K272|A0A073K272_LACRE 50S ribosomal protein L2 OS=Lactobacillus reuteri OX=1598 GN=rplB PE=3 SV=1	5	4	4	27.8	21.7	21.7	30.47	281	0.00033698	15.059			By matching	By matching	By matching			By matching						By matching						371540000	0	0	5472200	3267900	714340	0	0	1418000
A0A073K3C3	unreviewed	Pyruvate dehydrogenase E1 component subunit alpha (EC 1.2.4.1)	pdhA A4V07_01890 B2G46_03620 BFD03_04050 DL317_02530 GIX80_04180 GIX83_03980 LR3_05740	A0A073K3C3	A0A073K3C3	Lactobacillus reuteri	glycolytic process [GO:0006096]		pyruvate dehydrogenase (acetyl-transferring) activity [GO:0004739]	pyruvate dehydrogenase (acetyl-transferring) activity [GO:0004739]; glycolytic process [GO:0006096]	tr|A0A073K3C3|A0A073K3C3_LACRE Pyruvate dehydrogenase E1 component subunit alpha OS=Lactobacillus reuteri OX=1598 GN=pdhA PE=4 SV=1	7	7	7	28.5	28.5	28.5	41.003	368	0.0003076	11.533	By MS/MS	By matching	By matching																	169340000	1527800	2463800	1959400	0	0	0	0	0
A0A075B5K2	unreviewed	Immunoglobulin kappa chain variable 9-124	Igkv9-124	A0A075B5K2;A0A0G2JDR3	A0A075B5K2;A0A0G2JDR3	Mus musculus (Mouse)	immune response [GO:0006955]; immunoglobulin production [GO:0002377]	extracellular space [GO:0005615]		extracellular space [GO:0005615]; immune response [GO:0006955]; immunoglobulin production [GO:0002377]	tr|A0A075B5K2|A0A075B5K2_MOUSE Immunoglobulin kappa chain variable 9-124 OS=Mus musculus OX=10090 GN=Igkv9-124 PE=1 SV=7;tr|A0A0G2JDR3|A0A0G2JDR3_MOUSE Immunoglobulin kappa chain variable 9-124 (Fragment) OS=Mus musculus OX=10090 GN=Igkv9-124 PE=1 SV=4	3	3	3	55.8	55.8	55.8	10.419	95	0.00026271	7.4182		By matching			By matching				By matching	By matching		By matching	By matching			By matching	By matching	By matching		213440000	0	987910	0	0	804330	0	0	0
A0A075B5M2	unreviewed	Immunoglobulin kappa chain variable 4-61	Igkv4-61	A0A075B5M2;L7N239;J3QNZ9;A0A075B5M3;A0A0G2JH00;A0A0G2JGI6;A0A075B5L2;P01680	A0A075B5M2;L7N239;J3QNZ9;A0A075B5M3;A0A0G2JH00;A0A0G2JGI6;A0A075B5L2;P01680	Mus musculus (Mouse)	immune response [GO:0006955]; immunoglobulin production [GO:0002377]	extracellular space [GO:0005615]		extracellular space [GO:0005615]; immune response [GO:0006955]; immunoglobulin production [GO:0002377]	tr|A0A075B5M2|A0A075B5M2_MOUSE Immunoglobulin kappa chain variable 4-61 OS=Mus musculus OX=10090 GN=Igkv4-61 PE=4 SV=7;tr|L7N239|L7N239_MOUSE Immunoglobulin kappa chain variable 4-71 OS=Mus musculus OX=10090 GN=Igkv4-71 PE=4 SV=1;tr|J3QNZ9|J3QNZ9_MOUSE Imm	2	2	2	30.9	30.9	30.9	10.153	94	0.00033445	14.55				By matching								By matching	By matching	By matching		By matching				313170000	0	0	0	2080600	0	0	0	0
A0A075B5R0	unreviewed	Immunoglobulin heavy variable 5-16	Ighv5-16	A0A075B5R0;A0A0B4J1P4;K7U686;K7T9L3	A0A075B5R0;A0A0B4J1P4;K7U686;K7T9L3	Mus musculus (Mouse)	B cell receptor signaling pathway [GO:0050853]; complement activation, classical pathway [GO:0006958]; defense response to bacterium [GO:0042742]; innate immune response [GO:0045087]; phagocytosis, engulfment [GO:0006911]; phagocytosis, recognition [GO:0006910]; positive regulation of B cell activation [GO:0050871]	external side of plasma membrane [GO:0009897]; immunoglobulin complex, circulating [GO:0042571]	antigen binding [GO:0003823]; immunoglobulin receptor binding [GO:0034987]	external side of plasma membrane [GO:0009897]; immunoglobulin complex, circulating [GO:0042571]; antigen binding [GO:0003823]; immunoglobulin receptor binding [GO:0034987]; B cell receptor signaling pathway [GO:0050853]; complement activation, classical pathway [GO:0006958]; defense response to bacterium [GO:0042742]; innate immune response [GO:0045087]; phagocytosis, engulfment [GO:0006911]; pha…	tr|A0A075B5R0|A0A075B5R0_MOUSE Immunoglobulin heavy variable 5-16 OS=Mus musculus OX=10090 GN=Ighv5-16 PE=1 SV=1;tr|A0A0B4J1P4|A0A0B4J1P4_MOUSE Immunoglobulin heavy variable 5-16 (Fragment) OS=Mus musculus OX=10090 GN=Ighv5-16 PE=1 SV=1;tr|K7U686|K7U686_MO	2	2	2	23.3	23.3	23.3	13.217	116	0	37.129											By MS/MS	By MS/MS								85269000	0	0	0	0	0	0	0	0
A0A075B5T3	unreviewed	Immunoglobulin heavy variable 6-6 (Fragment)	Ighv6-6	A0A075B5T3;P01800;P01802;P01798	A0A075B5T3	Mus musculus (Mouse)	B cell receptor signaling pathway [GO:0050853]; complement activation, classical pathway [GO:0006958]; defense response to bacterium [GO:0042742]; innate immune response [GO:0045087]; phagocytosis, engulfment [GO:0006911]; phagocytosis, recognition [GO:0006910]; positive regulation of B cell activation [GO:0050871]	external side of plasma membrane [GO:0009897]; immunoglobulin complex, circulating [GO:0042571]	antigen binding [GO:0003823]; immunoglobulin receptor binding [GO:0034987]	external side of plasma membrane [GO:0009897]; immunoglobulin complex, circulating [GO:0042571]; antigen binding [GO:0003823]; immunoglobulin receptor binding [GO:0034987]; B cell receptor signaling pathway [GO:0050853]; complement activation, classical pathway [GO:0006958]; defense response to bacterium [GO:0042742]; innate immune response [GO:0045087]; phagocytosis, engulfment [GO:0006911]; pha…	tr|A0A075B5T3|A0A075B5T3_MOUSE Immunoglobulin heavy variable 6-6 (Fragment) OS=Mus musculus OX=10090 GN=Ighv6-6 PE=4 SV=1	5	1	3	57.1	40.3	10.9	13.293	119	0	135.88				By MS/MS	By MS/MS	By MS/MS	By matching	By matching			By matching	By MS/MS	By matching		By MS/MS		By MS/MS	By MS/MS	By matching	1139100000	0	0	0	172830000	129270000	21814000	1221600	1428500
A0A075B5T4	unreviewed	Immunoglobulin heavy variable 1-4 (Fragment)	Ighv1-4	A0A075B5T4;X5J4G3;X5J574;X5J5A7;X5J5J8;X5J4P1;X5J4D0;X5J4C6;X5J510;A0A075B5T7;X5J513	A0A075B5T4;X5J4G3;X5J574;X5J5A7;X5J5J8;X5J4P1;X5J4D0;X5J4C6;X5J510;A0A075B5T7;X5J513	Mus musculus (Mouse)	B cell receptor signaling pathway [GO:0050853]; complement activation, classical pathway [GO:0006958]; defense response to bacterium [GO:0042742]; innate immune response [GO:0045087]; phagocytosis, engulfment [GO:0006911]; phagocytosis, recognition [GO:0006910]; positive regulation of B cell activation [GO:0050871]	external side of plasma membrane [GO:0009897]; immunoglobulin complex, circulating [GO:0042571]	antigen binding [GO:0003823]; immunoglobulin receptor binding [GO:0034987]	external side of plasma membrane [GO:0009897]; immunoglobulin complex, circulating [GO:0042571]; antigen binding [GO:0003823]; immunoglobulin receptor binding [GO:0034987]; B cell receptor signaling pathway [GO:0050853]; complement activation, classical pathway [GO:0006958]; defense response to bacterium [GO:0042742]; innate immune response [GO:0045087]; phagocytosis, engulfment [GO:0006911]; pha…	tr|A0A075B5T4|A0A075B5T4_MOUSE Immunoglobulin heavy variable 1-4 (Fragment) OS=Mus musculus OX=10090 GN=Ighv1-4 PE=4 SV=1;tr|X5J4G3|X5J4G3_MOUSE IgM heavy chain VDJ region (Fragment) OS=Mus musculus OX=10090 PE=2 SV=1;tr|X5J574|X5J574_MOUSE IgM heavy chain	2	2	2	42.7	42.7	42.7	13.109	117	0.00077056	3.1585											By matching	By matching								102110000	0	0	0	0	0	0	0	0
A0A075B5U0	unreviewed	Immunoglobulin heavy variable V1-12	Ighv1-12	A0A075B5U0	A0A075B5U0	Mus musculus (Mouse)	B cell receptor signaling pathway [GO:0050853]; complement activation, classical pathway [GO:0006958]; defense response to bacterium [GO:0042742]; innate immune response [GO:0045087]; phagocytosis, engulfment [GO:0006911]; phagocytosis, recognition [GO:0006910]; positive regulation of B cell activation [GO:0050871]	external side of plasma membrane [GO:0009897]; immunoglobulin complex, circulating [GO:0042571]	antigen binding [GO:0003823]; immunoglobulin receptor binding [GO:0034987]	external side of plasma membrane [GO:0009897]; immunoglobulin complex, circulating [GO:0042571]; antigen binding [GO:0003823]; immunoglobulin receptor binding [GO:0034987]; B cell receptor signaling pathway [GO:0050853]; complement activation, classical pathway [GO:0006958]; defense response to bacterium [GO:0042742]; innate immune response [GO:0045087]; phagocytosis, engulfment [GO:0006911]; pha…	tr|A0A075B5U0|A0A075B5U0_MOUSE Immunoglobulin heavy variable V1-12 OS=Mus musculus OX=10090 GN=Ighv1-12 PE=4 SV=1	2	2	2	19.4	19.4	19.4	10.778	98	0.00043673	4.4291	By matching		By matching		By matching				By matching	By matching		By matching								67928000	1512200	0	707310	0	1488300	0	0	0
A0A075B5V8	unreviewed	Immunoglobulin heavy variable 1-47	Ighv1-47	A0A075B5V8;X5J4Q4;X5J4C7;X5J4N9;A0A0A6YY41;A0A075B680;X5J597;X5J5E2;X5J4H4	A0A075B5V8;X5J4Q4;X5J4C7;X5J4N9;A0A0A6YY41	Mus musculus (Mouse)	B cell receptor signaling pathway [GO:0050853]; complement activation, classical pathway [GO:0006958]; defense response to bacterium [GO:0042742]; innate immune response [GO:0045087]; phagocytosis, engulfment [GO:0006911]; phagocytosis, recognition [GO:0006910]; positive regulation of B cell activation [GO:0050871]	external side of plasma membrane [GO:0009897]; immunoglobulin complex, circulating [GO:0042571]	antigen binding [GO:0003823]; immunoglobulin receptor binding [GO:0034987]	external side of plasma membrane [GO:0009897]; immunoglobulin complex, circulating [GO:0042571]; antigen binding [GO:0003823]; immunoglobulin receptor binding [GO:0034987]; B cell receptor signaling pathway [GO:0050853]; complement activation, classical pathway [GO:0006958]; defense response to bacterium [GO:0042742]; innate immune response [GO:0045087]; phagocytosis, engulfment [GO:0006911]; pha…	tr|A0A075B5V8|A0A075B5V8_MOUSE Immunoglobulin heavy variable 1-47 OS=Mus musculus OX=10090 GN=Ighv1-47 PE=4 SV=1;tr|X5J4Q4|X5J4Q4_MOUSE IgM heavy chain VDJ region (Fragment) OS=Mus musculus OX=10090 PE=2 SV=1;tr|X5J4C7|X5J4C7_MOUSE IgM heavy chain VDJ regi	5	5	5	64.3	64.3	64.3	11.083	98	0	63.815							By matching				By matching	By matching								749710000	0	0	0	0	0	0	733180	0
A0A077S9N1	unreviewed	1,4-beta-N-acetylmuramidase C (EC 3.2.1.17)	Lyz1 Lyzf3	A0A077S9N1;P17897	A0A077S9N1;P17897	Mus musculus (Mouse)	cytolysis [GO:0019835]; defense response to bacterium [GO:0042742]; metabolic process [GO:0008152]		lysozyme activity [GO:0003796]	lysozyme activity [GO:0003796]; cytolysis [GO:0019835]; defense response to bacterium [GO:0042742]; metabolic process [GO:0008152]	tr|A0A077S9N1|A0A077S9N1_MOUSE Lysozyme OS=Mus musculus OX=10090 GN=Lyz1 PE=3 SV=1;sp|P17897|LYZ1_MOUSE Lysozyme C-1 OS=Mus musculus OX=10090 GN=Lyz1 PE=1 SV=1	3	3	3	35.1	35.1	35.1	16.794	148	0	26.782									By matching				By matching	By MS/MS	By MS/MS	By matching	By MS/MS	By matching		142060000	0	0	0	0	0	0	0	0
A0A079YUQ6	unreviewed	DNA-directed RNA polymerase subunit beta (RNAP subunit beta) (EC 2.7.7.6) (RNA polymerase subunit beta) (Transcriptase subunit beta)	rpoB A4V07_05800 B1A73_02335 B2G46_08040 B5F04_04415 B5G22_03300 BBP13_01910 BHL82_01575 BHL83_00405 C5O77_03605 C6H63_07305 CBF96_06720 DB324_00040 DL317_08565 DPH67_02245 E5337_01195 FOD75_02210 GIX51_03045 GIX73_00320 GIX74_04005 GIX83_06720	A0A079YUQ6	A0A079YUQ6	Lactobacillus reuteri	transcription, DNA-templated [GO:0006351]		DNA binding [GO:0003677]; DNA-directed 5'-3' RNA polymerase activity [GO:0003899]; ribonucleoside binding [GO:0032549]	DNA binding [GO:0003677]; DNA-directed 5'-3' RNA polymerase activity [GO:0003899]; ribonucleoside binding [GO:0032549]; transcription, DNA-templated [GO:0006351]	tr|A0A079YUQ6|A0A079YUQ6_LACRE DNA-directed RNA polymerase subunit beta OS=Lactobacillus reuteri OX=1598 GN=rpoB PE=3 SV=1	11	6	9	14.1	12.1	8.3	135.38	1205	0	40.941	By matching	By matching	By matching	By matching	By matching	By matching	By matching	By matching	By matching	By matching	By matching	By matching			By matching		By matching		By matching	730570000	3604400	6230300	6085500	6042600	4993600	6536600	3981900	5839300
A0A079YYU4	unreviewed	DNA-binding response regulator (DNA-binding response regulator, OmpR family) (PhoB family transcriptional regulator) (Response regulator) (Response regulator transcription factor)	A4V07_08690 B1A73_03815 B2G46_00795 B5F04_02390 B5G22_02430 BBP13_08925 BFD03_01520 C5O77_09295 C6H63_01255 CBF96_03120 CBG21_00760 CBG24_00560 DB324_01695 DB325_01905 DKZ23_01730 DKZ26_05215 DKZ35_10170 DL317_05595 E5337_02465 EW144_06500 FOD75_00595 GIX51_05465 GIX72_07725 GIX73_01795 GIX74_07825 GIX80_08220 GIX81_07485 GIX83_04270 HF82_09095 LRLP16767_LR202_00738 LWHH1689_0143	A0A079YYU4	A0A079YYU4	Lactobacillus reuteri	phosphorelay signal transduction system [GO:0000160]; regulation of transcription, DNA-templated [GO:0006355]		DNA binding [GO:0003677]	DNA binding [GO:0003677]; phosphorelay signal transduction system [GO:0000160]; regulation of transcription, DNA-templated [GO:0006355]	tr|A0A079YYU4|A0A079YYU4_LACRE DNA-binding response regulator OS=Lactobacillus reuteri OX=1598 GN=A4V07_08690 PE=4 SV=1	3	3	3	20.1	20.1	20.1	25.735	229	0.00024658	6.2308	By matching													By matching		By matching	By matching	By matching	By matching	92179000	875450	0	0	0	0	0	0	0
A0A081KVZ1	unreviewed	DNA starvation/stationary phase protection protein	A4V07_06645 B2G46_08900 BBP13_07030 BFD03_03555 DKZ26_10035 EW144_04385 FOD75_09450 GIX74_02570 GIX80_05990	A0A081KVZ1	A0A081KVZ1	Lactobacillus reuteri			ferric iron binding [GO:0008199]; oxidoreductase activity, oxidizing metal ions [GO:0016722]	ferric iron binding [GO:0008199]; oxidoreductase activity, oxidizing metal ions [GO:0016722]	tr|A0A081KVZ1|A0A081KVZ1_LACRE DNA starvation/stationary phase protection protein OS=Lactobacillus reuteri OX=1598 GN=A4V07_06645 PE=3 SV=1	7	7	7	58.7	58.7	58.7	18.223	155	0	118.11	By matching						By matching		By matching	By matching				By matching	By matching					1931400000	3226000	0	0	0	0	0	1459500	0
A0A081NMY9	unreviewed	Universal stress protein	A4V07_01000 ADV92_03300 B1A73_01440 B5D07_02900 B5F04_08515 B5G22_07945 BBP13_00930 BFD03_02295 BHL82_07940 BHL83_08315 BHL89_07525 C5O77_06065 C6H63_10220 CBF96_09300 CBG21_05475 CBG24_02895 DB324_01290 DB325_00410 DKZ23_05700 DKZ26_07870 DKZ35_07245 DL317_03505 DPH67_08170 EW144_08515 GIX51_01050 GIX72_01730 GIX73_05060 GIX74_00025 GIX81_03985 GIX83_08395 HF82_08480 LRLP16767_LR202_01187 LWHH16…	A0A081NMY9	A0A081NMY9	Lactobacillus reuteri		cytoplasm [GO:0005737]		cytoplasm [GO:0005737]	tr|A0A081NMY9|A0A081NMY9_LACRE Universal stress protein OS=Lactobacillus reuteri OX=1598 GN=A4V07_01000 PE=3 SV=1	6	6	6	50.6	50.6	50.6	18.017	162	0	141.74	By matching	By matching	By matching		By matching															539730000	1597200	2498500	1751100	0	1046100	0	0	0
A0A081NP48	unreviewed	50S ribosomal protein L15	rplO A4V07_05665 ADV92_08580 B1A73_02190 B2G46_07900 B5D07_07620 BBP13_01775 BFD03_07255 BHL82_07830 BHL83_02385 BHL89_08590 C5O77_07375 C6H63_07170 CBF96_06865 CBG21_06995 CBG24_08175 DB325_08315 DKZ23_00745 DL317_08720 DPH67_02385 E5337_08610 FOD75_02355 GIX51_03185 GIX72_06435 GIX73_00185 GIX74_03865 GIX80_09170 GIX81_06620 GIX83_06060 HF82_04530 LRLP16767_LR202_00092	A0A081NP48	A0A081NP48	Lactobacillus reuteri	translation [GO:0006412]	large ribosomal subunit [GO:0015934]	rRNA binding [GO:0019843]; structural constituent of ribosome [GO:0003735]	large ribosomal subunit [GO:0015934]; rRNA binding [GO:0019843]; structural constituent of ribosome [GO:0003735]; translation [GO:0006412]	tr|A0A081NP48|A0A081NP48_LACRE 50S ribosomal protein L15 OS=Lactobacillus reuteri OX=1598 GN=rplO PE=3 SV=1	3	3	3	31.9	31.9	31.9	15.431	144	0.00045998	5.1692			By matching	By matching						By matching	By matching				By matching		By matching		By matching	233820000	0	0	1000200	1042000	0	0	0	0
A0A087WRN7	unreviewed	Secretoglobin, family 2B, member 27	Scgb2b27	A0A087WRN7;Q7TNM9;Q7TNM8;Q8R1E9;Q7TNY5;Q7TNN0	A0A087WRN7;Q7TNM9;Q7TNM8;Q8R1E9;Q7TNY5;Q7TNN0	Mus musculus (Mouse)		extracellular region [GO:0005576]; extracellular space [GO:0005615]		extracellular region [GO:0005576]; extracellular space [GO:0005615]	tr|A0A087WRN7|A0A087WRN7_MOUSE MCG17492, isoform CRA_b OS=Mus musculus OX=10090 GN=Scgb2b27 PE=1 SV=1;tr|Q7TNM9|Q7TNM9_MOUSE Salivary androgen-binding protein beta subunit (Fragment) OS=Mus musculus domesticus OX=10092 GN=Scgb2b27 PE=2 SV=1;tr|Q7TNM8|Q7TNM	2	2	2	36.6	36.6	36.6	8.9124	82	0.00018369	18.965	By MS/MS	By MS/MS	By MS/MS	By MS/MS	By MS/MS	By MS/MS	By MS/MS	By MS/MS	By MS/MS	By MS/MS	By MS/MS	By MS/MS	By MS/MS	By MS/MS	By MS/MS	By MS/MS	By MS/MS	By MS/MS	By MS/MS	1730800000	14622000	15115000	39033000	29614000	22588000	15804000	31868000	31196000
A0A087WRZ7	unreviewed	Myosin light chain 1/3, skeletal muscle isoform	Myl1	A0A087WRZ7;Q545G5;E9PWG4;Q6PCW9;Q545T7;P05977;Q61935;E0CZ30;A0A0G2JDM3;A0A0G2JDW2;A2A6Q8;Q9CZ19;P09541;P09542	A0A087WRZ7;Q545G5;E9PWG4;Q6PCW9;Q545T7;P05977	Mus musculus (Mouse)			calcium ion binding [GO:0005509]	calcium ion binding [GO:0005509]	tr|A0A087WRZ7|A0A087WRZ7_MOUSE Myosin light chain 1/3, skeletal muscle isoform OS=Mus musculus OX=10090 GN=Myl1 PE=1 SV=1;tr|Q545G5|Q545G5_MOUSE MCG121569, isoform CRA_b OS=Mus musculus OX=10090 GN=Myl1 PE=2 SV=1;tr|E9PWG4|E9PWG4_MOUSE Myosin light chain 1	3	3	3	41.3	41.3	41.3	10.301	92	0.00046152	5.2169	By MS/MS	By matching	By MS/MS	By matching	By matching	By matching	By MS/MS	By MS/MS	By matching	By matching	By matching	By matching	By MS/MS	By matching	By MS/MS	By MS/MS	By matching	By matching	By matching	1273200000	33151000	37862000	27154000	28877000	29392000	57260000	14622000	15510000
A0A097PUG1	unreviewed	Anti-lox-1 15C4 heavy chain		A0A097PUG1;A0A097PUH2	A0A097PUG1;A0A097PUH2	Mus musculus (Mouse)					tr|A0A097PUG1|A0A097PUG1_MOUSE Anti-lox-1 15C4 heavy chain OS=Mus musculus OX=10090 PE=2 SV=1;tr|A0A097PUH2|A0A097PUH2_MOUSE Anti-dectin-1 15E2 heavy chain OS=Mus musculus OX=10090 PE=2 SV=1	2	2	2	6.2	6.2	6.2	51.332	468	0.0003427	15.899			By matching	By matching				By MS/MS			By matching	By matching								36180000	0	0	540330	541600	0	0	0	30835000
A0A098QRM0	unreviewed	Ribosome-recycling factor (RRF) (Ribosome-releasing factor)	frr A4V07_02125 B5F04_06045 B5G22_04990 BFD03_01310 C6H63_03570 DL317_02275 FOD75_06230 GIX72_00795 GIX73_01535 GIX83_07305 LRLP16767_LR202_01016	A0A098QRM0	A0A098QRM0	Lactobacillus reuteri	translational termination [GO:0006415]	cytoplasm [GO:0005737]		cytoplasm [GO:0005737]; translational termination [GO:0006415]	tr|A0A098QRM0|A0A098QRM0_LACRE Ribosome-recycling factor OS=Lactobacillus reuteri OX=1598 GN=frr PE=3 SV=1	4	4	4	38	38	38	20.735	187	0	64.799	By matching	By matching				By matching														165840000	7863000	796460	0	0	0	3772800	0	0
A0A098QRN5	unreviewed	50S ribosomal protein L5	rplE A4V07_05700 ADV92_08545 B1A73_02225 B2G46_07935 B5D07_07655 B5F04_04315 B5G22_03400 BBP13_01810 BFD03_07290 BHL82_07795 BHL83_02350 BHL89_08555 C6H63_07205 CBG21_07030 DB324_00150 DKZ23_00710 DKZ26_00115 DKZ35_07580 DL317_08685 DPH67_02350 EW144_03450 FOD75_02320 GIX72_06400 GIX80_09135 GIX81_06655 GIX83_06025 LRLP16767_LR202_00085 LWHH1689_1693	A0A098QRN5	A0A098QRN5	Lactobacillus reuteri	translation [GO:0006412]	ribosome [GO:0005840]	rRNA binding [GO:0019843]; structural constituent of ribosome [GO:0003735]; tRNA binding [GO:0000049]	ribosome [GO:0005840]; rRNA binding [GO:0019843]; structural constituent of ribosome [GO:0003735]; tRNA binding [GO:0000049]; translation [GO:0006412]	tr|A0A098QRN5|A0A098QRN5_LACRE 50S ribosomal protein L5 OS=Lactobacillus reuteri OX=1598 GN=rplE PE=3 SV=1	4	4	4	26.7	26.7	26.7	20.171	180	0.00019516	22.368	By matching	By matching	By matching	By MS/MS	By matching															328540000	4470100	2158600	1082000	2441500	1238000	0	0	0
A0A098QXN3	unreviewed	Cell division protein FtsZ	ftsZ A4V07_01705 B2G46_03435 BFD03_03875	A0A098QXN3	A0A098QXN3	Lactobacillus reuteri	division septum assembly [GO:0000917]; FtsZ-dependent cytokinesis [GO:0043093]; protein polymerization [GO:0051258]	cell division site [GO:0032153]; cytoplasm [GO:0005737]	GTPase activity [GO:0003924]; GTP binding [GO:0005525]	cell division site [GO:0032153]; cytoplasm [GO:0005737]; GTP binding [GO:0005525]; GTPase activity [GO:0003924]; division septum assembly [GO:0000917]; FtsZ-dependent cytokinesis [GO:0043093]; protein polymerization [GO:0051258]	tr|A0A098QXN3|A0A098QXN3_LACRE Cell division protein FtsZ OS=Lactobacillus reuteri OX=1598 GN=ftsZ PE=3 SV=1	9	9	9	44.6	44.6	44.6	44.466	415	0.00019463	22.211	By matching	By matching		By matching	By matching	By matching							By matching		By matching	By matching			By matching	261610000	1854700	2316200	0	2855600	1919000	2875200	0	0
A0A098QXQ1	unreviewed	UDP-N-acetylglucosamine 1-carboxyvinyltransferase (EC 2.5.1.7) (Enoylpyruvate transferase) (UDP-N-acetylglucosamine enolpyruvyl transferase) (EPT)	murA A4V07_09230 B2G46_01385 BBP13_09755 BFD03_06615 DKZ26_10190 DKZ35_05450 EW144_07100 GIX73_03030 GIX80_09440	A0A098QXQ1	A0A098QXQ1	Lactobacillus reuteri	cell cycle [GO:0007049]; cell division [GO:0051301]; cell wall organization [GO:0071555]; peptidoglycan biosynthetic process [GO:0009252]; regulation of cell shape [GO:0008360]; UDP-N-acetylgalactosamine biosynthetic process [GO:0019277]	cytoplasm [GO:0005737]	UDP-N-acetylglucosamine 1-carboxyvinyltransferase activity [GO:0008760]	cytoplasm [GO:0005737]; UDP-N-acetylglucosamine 1-carboxyvinyltransferase activity [GO:0008760]; cell cycle [GO:0007049]; cell division [GO:0051301]; cell wall organization [GO:0071555]; peptidoglycan biosynthetic process [GO:0009252]; regulation of cell shape [GO:0008360]; UDP-N-acetylgalactosamine biosynthetic process [GO:0019277]	tr|A0A098QXQ1|A0A098QXQ1_LACRE UDP-N-acetylglucosamine 1-carboxyvinyltransferase OS=Lactobacillus reuteri OX=1598 GN=murA PE=3 SV=1	4	4	4	20.9	20.9	20.9	45.676	425	0.00025618	6.9335												By matching	By matching							76129000	0	0	0	0	0	0	0	0
A0A098QZE8	unreviewed	L-arabinose isomerase	A4V07_00980 ADV92_03320 BBP13_00950 BFD03_02275 BHL82_07920 BHL89_07505 C5O77_06045 C6H63_10240 DB325_00430	A0A098QZE8	A0A098QZE8	Lactobacillus reuteri	arabinose catabolic process [GO:0019568]	cytoplasm [GO:0005737]	L-arabinose isomerase activity [GO:0008733]; metal ion binding [GO:0046872]	cytoplasm [GO:0005737]; L-arabinose isomerase activity [GO:0008733]; metal ion binding [GO:0046872]; arabinose catabolic process [GO:0019568]	tr|A0A098QZE8|A0A098QZE8_LACRE L-arabinose isomerase OS=Lactobacillus reuteri OX=1598 GN=A4V07_00980 PE=3 SV=1	10	10	10	30.2	30.2	30.2	53.732	473	0	64.303	By matching	By matching				By matching										By matching	By matching			4530900000	3291500	3702800	0	0	0	539050	0	0
A0A098QZH2	unreviewed	Aldehyde-alcohol dehydrogenase	adhE adhC A4V07_00075 B2G46_01900 BBP13_00330 BFD03_04620 EW144_07605 FOD75_08970 GIX73_02435	A0A098QZH2	A0A098QZH2	Lactobacillus reuteri	alcohol metabolic process [GO:0006066]; carbon utilization [GO:0015976]		acetaldehyde dehydrogenase (acetylating) activity [GO:0008774]; alcohol dehydrogenase (NAD+) activity [GO:0004022]; metal ion binding [GO:0046872]	acetaldehyde dehydrogenase (acetylating) activity [GO:0008774]; alcohol dehydrogenase (NAD+) activity [GO:0004022]; metal ion binding [GO:0046872]; alcohol metabolic process [GO:0006066]; carbon utilization [GO:0015976]	tr|A0A098QZH2|A0A098QZH2_LACRE Aldehyde-alcohol dehydrogenase OS=Lactobacillus reuteri OX=1598 GN=A4V07_00075 PE=3 SV=1	37	37	37	67.5	67.5	67.5	97.187	878	0	323.31	By matching	By MS/MS	By matching	By MS/MS	By MS/MS	By matching	By matching	By matching	By matching	By matching	By matching	By matching	By matching	By matching	By matching	By matching	By matching	By matching	By matching	32995000000	5294200	15177000	7126400	18193000	5840300	10746000	1906700	2623700
A0A099NQD3	unreviewed	Uncharacterized protein	C5L36_0B11170 CAS74_004642 JL09_g1546 JL09_g6106	A0A099NQD3;A0A1V2LV07	A0A099NQD3;A0A1V2LV07	Pichia kudriavzevii (Yeast) (Issatchenkia orientalis)					tr|A0A099NQD3|A0A099NQD3_PICKU Uncharacterized protein OS=Pichia kudriavzevii OX=4909 GN=C5L36_0B11170 PE=4 SV=1;tr|A0A1V2LV07|A0A1V2LV07_PICKU Uncharacterized protein OS=Pichia kudriavzevii OX=4909 GN=BOH78_0618 PE=4 SV=1	2	2	2	13.6	13.6	13.6	20.536	184	0.0044802	2.001	By matching	By matching							By matching			By matching	By matching							16659000	1418600	1303700	0	0	0	0	0	0
A0A099NSK6	unreviewed	40S ribosomal protein S22	BOH78_0483 C5L36_0B09860 CAS74_003848 JL09_g5837	A0A099NSK6	A0A099NSK6	Pichia kudriavzevii (Yeast) (Issatchenkia orientalis)	translation [GO:0006412]	ribosome [GO:0005840]	structural constituent of ribosome [GO:0003735]	ribosome [GO:0005840]; structural constituent of ribosome [GO:0003735]; translation [GO:0006412]	tr|A0A099NSK6|A0A099NSK6_PICKU 40S ribosomal protein S22 OS=Pichia kudriavzevii OX=4909 GN=BOH78_0483 PE=3 SV=1	4	2	4	40.8	40.8	22.3	14.7	130	0	323.31	By MS/MS	By MS/MS			By matching				By matching				By matching						By matching	1697300000	5178500	7413100	0	0	719720	0	0	0
A0A099NT26	unreviewed	Uncharacterized protein	JL09_g5095	A0A099NT26;A0A099P6H2	A0A099NT26;A0A099P6H2	Pichia kudriavzevii (Yeast) (Issatchenkia orientalis)					tr|A0A099NT26|A0A099NT26_PICKU Uncharacterized protein OS=Pichia kudriavzevii OX=4909 GN=JL09_g5095 PE=4 SV=1;tr|A0A099P6H2|A0A099P6H2_PICKU Uncharacterized protein OS=Pichia kudriavzevii OX=4909 GN=BOH78_2746 PE=4 SV=1	5	5	5	40.8	40.8	40.8	16.463	147	0	43.959						By matching	By matching										By matching		By matching	259240000	0	0	0	0	0	342470	1462200	0
A0A099NT48	unreviewed	40S ribosomal protein S13	BOH78_0194 CAS74_003069 JL09_g5646	A0A099NT48;A0A2U9R9S0	A0A099NT48;A0A2U9R9S0	Pichia kudriavzevii (Yeast) (Issatchenkia orientalis)	translation [GO:0006412]	ribosome [GO:0005840]	structural constituent of ribosome [GO:0003735]	ribosome [GO:0005840]; structural constituent of ribosome [GO:0003735]; translation [GO:0006412]	tr|A0A099NT48|A0A099NT48_PICKU 40S ribosomal protein S13 OS=Pichia kudriavzevii OX=4909 GN=BOH78_0194 PE=3 SV=1;tr|A0A2U9R9S0|A0A2U9R9S0_PICKU Uncharacterized protein OS=Pichia kudriavzevii OX=4909 GN=C5L36_0E01860 PE=3 SV=1	6	3	6	41.1	41.1	27	16.035	141	0.00032036	12.974	By matching		By matching			By MS/MS	By matching	By matching	By matching	By matching		By matching		By matching			By matching	By MS/MS	By MS/MS	3197100000	2778400	0	525730	0	0	3035200	4740200	5068100
A0A099NTY7	unreviewed	60S ribosomal protein L9-A	BOH78_0167 C5L36_0E02140 CAS74_003041 JL09_g4747 JL09_g4750	A0A099NTY7	A0A099NTY7	Pichia kudriavzevii (Yeast) (Issatchenkia orientalis)	translation [GO:0006412]	ribosome [GO:0005840]	rRNA binding [GO:0019843]; structural constituent of ribosome [GO:0003735]	ribosome [GO:0005840]; rRNA binding [GO:0019843]; structural constituent of ribosome [GO:0003735]; translation [GO:0006412]	tr|A0A099NTY7|A0A099NTY7_PICKU 60S ribosomal protein L9-A OS=Pichia kudriavzevii OX=4909 GN=BOH78_0167 PE=4 SV=1	5	4	4	34.6	29.3	29.3	21.641	191	0	28.866	By matching	By matching	By matching	By matching		By matching	By matching	By matching	By matching	By matching				By matching	By matching	By matching		By matching	By matching	325000000	0	0	337750	306530	0	1227700	0	0
A0A099NUA9	unreviewed	Cytochrome c oxidase subunit 4, mitochondrial	BOH78_2664 C5L36_0B06090 CAS74_003705 JL09_g5365 JL09_g5368	A0A099NUA9	A0A099NUA9	Pichia kudriavzevii (Yeast) (Issatchenkia orientalis)		mitochondrial inner membrane [GO:0005743]	cytochrome-c oxidase activity [GO:0004129]; metal ion binding [GO:0046872]	mitochondrial inner membrane [GO:0005743]; cytochrome-c oxidase activity [GO:0004129]; metal ion binding [GO:0046872]	tr|A0A099NUA9|A0A099NUA9_PICKU Cytochrome c oxidase subunit 4, mitochondrial OS=Pichia kudriavzevii OX=4909 GN=BOH78_2664 PE=4 SV=1	3	3	3	26.5	26.5	26.5	16.962	151	0.00044038	4.5501									By matching	By matching	By matching	By matching			By matching					111970000	0	0	0	0	0	0	0	0
A0A099NUP4	unreviewed	Pyruvate dehydrogenase E1 component subunit beta (EC 1.2.4.1)	BOH78_2121 C5L36_0B02890 CAS74_003390 JL09_g4308	A0A099NUP4	A0A099NUP4	Pichia kudriavzevii (Yeast) (Issatchenkia orientalis)	acetyl-CoA biosynthetic process from pyruvate [GO:0006086]	mitochondrial nucleoid [GO:0042645]; mitochondrial pyruvate dehydrogenase complex [GO:0005967]	pyruvate dehydrogenase (acetyl-transferring) activity [GO:0004739]	mitochondrial nucleoid [GO:0042645]; mitochondrial pyruvate dehydrogenase complex [GO:0005967]; pyruvate dehydrogenase (acetyl-transferring) activity [GO:0004739]; acetyl-CoA biosynthetic process from pyruvate [GO:0006086]	tr|A0A099NUP4|A0A099NUP4_PICKU Pyruvate dehydrogenase E1 component subunit beta OS=Pichia kudriavzevii OX=4909 GN=BOH78_2121 PE=4 SV=1	4	4	4	18.6	18.6	18.6	40.455	371	0.00028674	9.5129		By matching	By matching			By matching					By matching	By matching								621080000	0	886990	638920	0	0	523600	0	0
A0A099NUU5	unreviewed	MIF4G domain-containing protein	JL09_g4258	A0A099NUU5;A0A2U9QZE5;A0A1Z8JJE0	A0A099NUU5;A0A2U9QZE5;A0A1Z8JJE0	Pichia kudriavzevii (Yeast) (Issatchenkia orientalis)			RNA binding [GO:0003723]	RNA binding [GO:0003723]	tr|A0A099NUU5|A0A099NUU5_PICKU Uncharacterized protein OS=Pichia kudriavzevii OX=4909 GN=JL09_g4258 PE=4 SV=1;tr|A0A2U9QZE5|A0A2U9QZE5_PICKU Uncharacterized protein OS=Pichia kudriavzevii OX=4909 GN=C5L36_0A09900 PE=4 SV=1;tr|A0A1Z8JJE0|A0A1Z8JJE0_PICKU Un	14	4	14	30.6	30.6	11.6	105.87	950	0	323.31											By matching	By matching								502710000	0	0	0	0	0	0	0	0
A0A099NUW3	unreviewed	Uncharacterized protein (Fragment)	JL09_g5138	A0A099NUW3;A0A099NT13;A0A1Z8JMQ2;A0A1V2LL34	A0A099NUW3;A0A099NT13;A0A1Z8JMQ2;A0A1V2LL34	Pichia kudriavzevii (Yeast) (Issatchenkia orientalis)			oxidoreductase activity [GO:0016491]	oxidoreductase activity [GO:0016491]	tr|A0A099NUW3|A0A099NUW3_PICKU Uncharacterized protein (Fragment) OS=Pichia kudriavzevii OX=4909 GN=JL09_g5138 PE=4 SV=1;tr|A0A099NT13|A0A099NT13_PICKU Uncharacterized protein (Fragment) OS=Pichia kudriavzevii OX=4909 GN=JL09_g5105 PE=4 SV=1;tr|A0A1Z8JMQ2|	11	10	11	36.8	36.8	31.7	47.933	438	0	69.885	By matching			By matching	By matching	By matching						By matching	By matching			By matching				561190000	2165800	0	0	868020	719690	9167900	0	0
A0A099NUZ2	unreviewed	Uncharacterized protein	CAS74_000855 JL09_g4194	A0A099NUZ2;A0A1V2LRC2	A0A099NUZ2;A0A1V2LRC2	Pichia kudriavzevii (Yeast) (Issatchenkia orientalis)	energy reserve metabolic process [GO:0006112]			energy reserve metabolic process [GO:0006112]	tr|A0A099NUZ2|A0A099NUZ2_PICKU Uncharacterized protein OS=Pichia kudriavzevii OX=4909 GN=CAS74_000855 PE=4 SV=1;tr|A0A1V2LRC2|A0A1V2LRC2_PICKU Respiratory growth induced protein 1 OS=Pichia kudriavzevii OX=4909 GN=BOH78_1330 PE=4 SV=1	6	6	6	42.9	42.9	42.9	22.461	189	0	48.183											By matching	By matching								342590000	0	0	0	0	0	0	0	0
A0A099NV63	unreviewed	5-methyltetrahydropteroyltriglutamate--homocysteine S-methyltransferase (EC 2.1.1.14)	BOH78_3606 C5L36_0A00150 CAS74_001202 JL09_g4378	A0A099NV63	A0A099NV63	Pichia kudriavzevii (Yeast) (Issatchenkia orientalis)	adenine biosynthetic process [GO:0046084]; L-methionine biosynthetic process from homoserine via O-acetyl-L-homoserine and cystathionine [GO:0019280]; methylation [GO:0032259]		5-methyltetrahydropteroyltriglutamate-homocysteine S-methyltransferase activity [GO:0003871]; zinc ion binding [GO:0008270]	5-methyltetrahydropteroyltriglutamate-homocysteine S-methyltransferase activity [GO:0003871]; zinc ion binding [GO:0008270]; adenine biosynthetic process [GO:0046084]; L-methionine biosynthetic process from homoserine via O-acetyl-L-homoserine and cystathionine [GO:0019280]; methylation [GO:0032259]	tr|A0A099NV63|A0A099NV63_PICKU 5-methyltetrahydropteroyltriglutamate--homocysteine methyltransferase OS=Pichia kudriavzevii OX=4909 GN=BOH78_3606 PE=3 SV=1	40	28	40	60.6	60.6	43.4	86.412	769	0	323.31	By MS/MS	By MS/MS	By matching	By matching	By matching	By matching	By matching	By matching	By matching	By matching		By matching			By matching	By matching	By matching	By matching	By matching	23960000000	19834000	19473000	4726900	8642300	9573600	3635200	2097000	4593600
A0A099NV99	unreviewed	Rhodanese domain-containing protein	JL09_g4088	A0A099NV99;A0A1V2LP54;A0A099NV94	A0A099NV99;A0A1V2LP54;A0A099NV94	Pichia kudriavzevii (Yeast) (Issatchenkia orientalis)			thiosulfate sulfurtransferase activity [GO:0004792]	thiosulfate sulfurtransferase activity [GO:0004792]	tr|A0A099NV99|A0A099NV99_PICKU Uncharacterized protein OS=Pichia kudriavzevii OX=4909 GN=JL09_g4088 PE=4 SV=1;tr|A0A1V2LP54|A0A1V2LP54_PICKU Thiosulfate sulfurtransferase RDL1, mitochondrial OS=Pichia kudriavzevii OX=4909 GN=BOH78_2028 PE=4 SV=1;tr|A0A099N	5	5	5	52.1	52.1	52.1	15.633	140	0	323.31		By matching				By matching							By matching					By matching	By matching	801250000	0	930520	0	0	0	3456700	0	0
A0A099NVC6	unreviewed	Eukaryotic translation initiation factor 2 subunit alpha	BOH78_3003 C5L36_0A06970 CAS74_001899 JL09_g4270	A0A099NVC6	A0A099NVC6	Pichia kudriavzevii (Yeast) (Issatchenkia orientalis)	formation of translation preinitiation complex [GO:0001731]	eukaryotic 48S preinitiation complex [GO:0033290]; eukaryotic translation initiation factor 2 complex [GO:0005850]; multi-eIF complex [GO:0043614]	GTP binding [GO:0005525]; methionyl-initiator methionine tRNA binding [GO:1990856]; translation initiation factor activity [GO:0003743]	eukaryotic 48S preinitiation complex [GO:0033290]; eukaryotic translation initiation factor 2 complex [GO:0005850]; multi-eIF complex [GO:0043614]; GTP binding [GO:0005525]; methionyl-initiator methionine tRNA binding [GO:1990856]; translation initiation factor activity [GO:0003743]; formation of translation preinitiation complex [GO:0001731]	tr|A0A099NVC6|A0A099NVC6_PICKU Eukaryotic translation initiation factor 2 subunit alpha OS=Pichia kudriavzevii OX=4909 GN=BOH78_3003 PE=4 SV=1	10	10	10	44.8	44.8	44.8	34.975	308	0	125.77		By matching	By matching															By matching		754830000	0	1456800	2141000	0	0	0	0	0
A0A099NVK4	unreviewed	SGL domain-containing protein	JL09_g4893	A0A099NVK4;A0A1Z8JP18;A0A099P0P3	A0A099NVK4;A0A1Z8JP18;A0A099P0P3	Pichia kudriavzevii (Yeast) (Issatchenkia orientalis)					tr|A0A099NVK4|A0A099NVK4_PICKU Uncharacterized protein OS=Pichia kudriavzevii OX=4909 GN=JL09_g4893 PE=4 SV=1;tr|A0A1Z8JP18|A0A1Z8JP18_PICKU Uncharacterized protein OS=Pichia kudriavzevii OX=4909 GN=CAS74_002053 PE=4 SV=1;tr|A0A099P0P3|A0A099P0P3_PICKU Cel	15	15	15	68.7	68.7	68.7	34.083	310	0	323.31										By matching							By matching	By matching	By matching	2542700000	0	0	0	0	0	0	0	0
A0A099NVT6	unreviewed	SAM_MT_RSMB_NOP domain-containing protein	C5L36_0D06430 CAS74_002621 JL09_g4118	A0A099NVT6	A0A099NVT6	Pichia kudriavzevii (Yeast) (Issatchenkia orientalis)	ribosome biogenesis [GO:0042254]; RNA methylation [GO:0001510]; RNA processing [GO:0006396]	nucleolus [GO:0005730]	RNA binding [GO:0003723]; S-adenosylmethionine-dependent methyltransferase activity [GO:0008757]	nucleolus [GO:0005730]; RNA binding [GO:0003723]; S-adenosylmethionine-dependent methyltransferase activity [GO:0008757]; ribosome biogenesis [GO:0042254]; RNA methylation [GO:0001510]; RNA processing [GO:0006396]	tr|A0A099NVT6|A0A099NVT6_PICKU Uncharacterized protein OS=Pichia kudriavzevii OX=4909 GN=C5L36_0D06430 PE=3 SV=1	2	1	2	6.2	6.2	2.4	70.897	628	0.00050725	3.6169												By matching	By matching							58412000	0	0	0	0	0	0	0	0
A0A099NWB6	unreviewed	60S ribosomal protein L3	BOH78_1982 C5L36_0D05030 CAS74_002486 JL09_g4642	A0A099NWB6	A0A099NWB6	Pichia kudriavzevii (Yeast) (Issatchenkia orientalis)	maintenance of translational fidelity [GO:1990145]; ribosomal large subunit assembly [GO:0000027]; rRNA processing [GO:0006364]	cytosolic large ribosomal subunit [GO:0022625]	structural constituent of ribosome [GO:0003735]	cytosolic large ribosomal subunit [GO:0022625]; structural constituent of ribosome [GO:0003735]; maintenance of translational fidelity [GO:1990145]; ribosomal large subunit assembly [GO:0000027]; rRNA processing [GO:0006364]	tr|A0A099NWB6|A0A099NWB6_PICKU 60S ribosomal protein L3 OS=Pichia kudriavzevii OX=4909 GN=BOH78_1982 PE=3 SV=1	9	5	6	27.8	21.4	16	43.843	388	0.00019231	21.361	By matching	By matching	By matching		By matching	By matching	By matching	By matching			By matching					By matching				1492000000	8033900	8086300	6647000	0	3311800	3520700	1187000	378710
A0A099NWM4	unreviewed	6-phosphogluconate dehydrogenase, decarboxylating (EC 1.1.1.44)	BOH78_1405 CAS74_000782 JL09_g4514	A0A099NWM4;A0A2U9R7B1	A0A099NWM4;A0A2U9R7B1	Pichia kudriavzevii (Yeast) (Issatchenkia orientalis)	D-gluconate metabolic process [GO:0019521]; pentose-phosphate shunt [GO:0006098]		NADP binding [GO:0050661]; phosphogluconate dehydrogenase (decarboxylating) activity [GO:0004616]	NADP binding [GO:0050661]; phosphogluconate dehydrogenase (decarboxylating) activity [GO:0004616]; D-gluconate metabolic process [GO:0019521]; pentose-phosphate shunt [GO:0006098]	tr|A0A099NWM4|A0A099NWM4_PICKU 6-phosphogluconate dehydrogenase, decarboxylating OS=Pichia kudriavzevii OX=4909 GN=BOH78_1405 PE=3 SV=1;tr|A0A2U9R7B1|A0A2U9R7B1_PICKU 6-phosphogluconate dehydrogenase, decarboxylating OS=Pichia kudriavzevii OX=4909 GN=C5L36	21	16	19	64.4	62.5	53.7	52.488	477	0	309.44	By matching	By matching	By matching	By matching	By matching				By matching						By matching		By matching	By matching	By MS/MS	5694600000	0	0	0	2617600	618720	0	0	0
A0A099NWP3	unreviewed	Ribosomal protein S10	BOH78_3544 C5L36_0C00490 CAS74_000043 JL09_g3816	A0A099NWP3	A0A099NWP3	Pichia kudriavzevii (Yeast) (Issatchenkia orientalis)	translation [GO:0006412]	small ribosomal subunit [GO:0015935]	RNA binding [GO:0003723]; structural constituent of ribosome [GO:0003735]	small ribosomal subunit [GO:0015935]; RNA binding [GO:0003723]; structural constituent of ribosome [GO:0003735]; translation [GO:0006412]	tr|A0A099NWP3|A0A099NWP3_PICKU Ribosomal protein S10 OS=Pichia kudriavzevii OX=4909 GN=BOH78_3544 PE=3 SV=1	4	4	4	27	27	27	12.957	115	0	45.262				By matching	By matching			By matching												2677400000	0	0	0	778230	445560	0	0	486570
A0A099NWV4	unreviewed	Threonine synthase (EC 4.2.3.1)	JL09_g3764	A0A099NWV4;A0A099NUE8	A0A099NWV4	Pichia kudriavzevii (Yeast) (Issatchenkia orientalis)	threonine biosynthetic process [GO:0009088]		pyridoxal phosphate binding [GO:0030170]; threonine synthase activity [GO:0004795]	pyridoxal phosphate binding [GO:0030170]; threonine synthase activity [GO:0004795]; threonine biosynthetic process [GO:0009088]	tr|A0A099NWV4|A0A099NWV4_PICKU Uncharacterized protein OS=Pichia kudriavzevii OX=4909 GN=JL09_g3764 PE=4 SV=1	18	1	18	53.3	53.3	2.9	57.515	510	0	130.8	By matching	By matching	By matching	By matching		By matching	By matching				By matching		By matching				By matching	By matching		1619900000	1194500	793180	1451000	985830	0	779250	2638800	0
A0A099NWW3	unreviewed	40S ribosomal protein S19-B	CAS74_003301 JL09_g3736	A0A099NWW3;A0A1V2LMY0;A0A2U9R0U2;A0A099NV09	A0A099NWW3;A0A1V2LMY0;A0A2U9R0U2	Pichia kudriavzevii (Yeast) (Issatchenkia orientalis)	translation [GO:0006412]	ribosome [GO:0005840]	structural constituent of ribosome [GO:0003735]	ribosome [GO:0005840]; structural constituent of ribosome [GO:0003735]; translation [GO:0006412]	tr|A0A099NWW3|A0A099NWW3_PICKU 40S ribosomal protein S19-B OS=Pichia kudriavzevii OX=4909 GN=CAS74_003301 PE=4 SV=1;tr|A0A1V2LMY0|A0A1V2LMY0_PICKU Uncharacterized protein OS=Pichia kudriavzevii OX=4909 GN=BOH78_3159 PE=4 SV=1;tr|A0A2U9R0U2|A0A2U9R0U2_PICKU	8	7	8	28.7	28.7	26.5	35.502	321	0	103.77		By matching	By matching				By matching	By matching					By matching			By matching		By matching		2542600000	0	1762000	729350	0	0	0	2005900	1935300
A0A099NX03	unreviewed	Uncharacterized protein	JL09_g3689	A0A099NX03;A0A1V2LMM2;A0A2U9QZE6	A0A099NX03;A0A1V2LMM2;A0A2U9QZE6	Pichia kudriavzevii (Yeast) (Issatchenkia orientalis)					tr|A0A099NX03|A0A099NX03_PICKU Uncharacterized protein OS=Pichia kudriavzevii OX=4909 GN=JL09_g3689 PE=4 SV=1;tr|A0A1V2LMM2|A0A1V2LMM2_PICKU Tropomyosin-2 OS=Pichia kudriavzevii OX=4909 GN=BOH78_2571 PE=4 SV=1;tr|A0A2U9QZE6|A0A2U9QZE6_PICKU Uncharacterized	11	11	11	64.9	64.9	64.9	17.867	154	0	323.31		By matching							By matching	By matching	By matching	By matching		By matching						8090000000	0	2539600	0	0	0	0	0	0
A0A099NXA0	unreviewed	Isocitrate dehydrogenase [NADP] (EC 1.1.1.42)	BOH78_1458 C5L36_0C07130 CAS74_000730 JL09_g3619	A0A099NXA0;A0A061B6B4	A0A099NXA0	Pichia kudriavzevii (Yeast) (Issatchenkia orientalis)	isocitrate metabolic process [GO:0006102]; tricarboxylic acid cycle [GO:0006099]		isocitrate dehydrogenase (NADP+) activity [GO:0004450]; magnesium ion binding [GO:0000287]; NAD binding [GO:0051287]	isocitrate dehydrogenase (NADP+) activity [GO:0004450]; magnesium ion binding [GO:0000287]; NAD binding [GO:0051287]; isocitrate metabolic process [GO:0006102]; tricarboxylic acid cycle [GO:0006099]	tr|A0A099NXA0|A0A099NXA0_PICKU Isocitrate dehydrogenase [NADP] OS=Pichia kudriavzevii OX=4909 GN=BOH78_1458 PE=3 SV=1	11	7	9	29.5	25.2	19.7	49.089	441	0.00017274	16.28	By matching	By matching		By matching	By matching	By matching	By matching	By matching	By matching	By matching	By matching	By matching	By matching		By matching	By matching	By matching	By matching	By matching	620150000	0	0	0	0	0	0	0	0
A0A099NXC1	unreviewed	Adenylate kinase (EC 2.7.4.3) (ATP-AMP transphosphorylase) (ATP:AMP phosphotransferase) (Adenylate kinase cytosolic and mitochondrial) (Adenylate monophosphate kinase)	ADK1 BOH78_2551 C5L36_0A09940 CAS74_004377 JL09_g4262	A0A099NXC1	A0A099NXC1	Pichia kudriavzevii (Yeast) (Issatchenkia orientalis)	ADP biosynthetic process [GO:0006172]; AMP metabolic process [GO:0046033]; ATP metabolic process [GO:0046034]	cytosol [GO:0005829]; mitochondrial intermembrane space [GO:0005758]	adenylate kinase activity [GO:0004017]; ATP binding [GO:0005524]	cytosol [GO:0005829]; mitochondrial intermembrane space [GO:0005758]; adenylate kinase activity [GO:0004017]; ATP binding [GO:0005524]; ADP biosynthetic process [GO:0006172]; AMP metabolic process [GO:0046033]; ATP metabolic process [GO:0046034]	tr|A0A099NXC1|A0A099NXC1_PICKU Adenylate kinase OS=Pichia kudriavzevii OX=4909 GN=ADK1 PE=3 SV=1	10	8	8	61.2	52.4	52.4	24.987	227	0	243.86	By matching	By matching	By matching			By matching	By matching	By matching	By matching	By matching	By matching		By matching					By matching	By matching	1593900000	0	0	0	0	0	0	0	0
A0A099NXC2	unreviewed	Aconitate hydratase, mitochondrial (Aconitase) (EC 4.2.1.-)	BOH78_1337 C5L36_0C08340 CAS74_000849 JL09_g3381	A0A099NXC2;X2GDK6;A0A099NS89	A0A099NXC2	Pichia kudriavzevii (Yeast) (Issatchenkia orientalis)	tricarboxylic acid cycle [GO:0006099]	mitochondrion [GO:0005739]	4 iron, 4 sulfur cluster binding [GO:0051539]; aconitate hydratase activity [GO:0003994]; metal ion binding [GO:0046872]	mitochondrion [GO:0005739]; 4 iron, 4 sulfur cluster binding [GO:0051539]; aconitate hydratase activity [GO:0003994]; metal ion binding [GO:0046872]; tricarboxylic acid cycle [GO:0006099]	tr|A0A099NXC2|A0A099NXC2_PICKU Aconitate hydratase, mitochondrial OS=Pichia kudriavzevii OX=4909 GN=BOH78_1337 PE=3 SV=1	19	12	14	35.6	27.2	24.6	85.062	779	0	323.31	By matching	By matching			By matching		By matching				By matching				By matching	By matching	By matching	By matching	By matching	4445400000	11030000	645690	0	0	10141000	0	670940	0
A0A099NXH0	unreviewed	Acetyl-CoA deacylase (EC 3.1.2.1) (Acetyl-CoA hydrolase)	C5L36_0A09950 CAS74_004378 JL09_g4263	A0A099NXH0;A0A1V2LP13	A0A099NXH0;A0A1V2LP13	Pichia kudriavzevii (Yeast) (Issatchenkia orientalis)	acetate metabolic process [GO:0006083]; propionate metabolic process, methylcitrate cycle [GO:0019679]		acetate CoA-transferase activity [GO:0008775]; acetyl-CoA hydrolase activity [GO:0003986]	acetate CoA-transferase activity [GO:0008775]; acetyl-CoA hydrolase activity [GO:0003986]; acetate metabolic process [GO:0006083]; propionate metabolic process, methylcitrate cycle [GO:0019679]	tr|A0A099NXH0|A0A099NXH0_PICKU Acetyl-CoA hydrolase OS=Pichia kudriavzevii OX=4909 GN=C5L36_0A09950 PE=4 SV=1;tr|A0A1V2LP13|A0A1V2LP13_PICKU Acetyl-CoA hydrolase OS=Pichia kudriavzevii OX=4909 GN=BOH78_2550 PE=4 SV=1	11	9	11	34.8	34.8	29.4	58.432	523	0	43.989	By matching	By matching				By matching											By matching	By matching		750470000	3288000	3702200	0	0	0	474300	0	0
A0A099NXT9	unreviewed	PCI domain-containing protein	JL09_g3424	A0A099NXT9;A0A1Z8JUA8;A0A2U9R6G6;A0A1Z8JU70	A0A099NXT9;A0A1Z8JUA8	Pichia kudriavzevii (Yeast) (Issatchenkia orientalis)	regulation of protein catabolic process [GO:0042176]	integral component of membrane [GO:0016021]; mitochondrial inner membrane [GO:0005743]; proteasome complex [GO:0000502]	copper ion binding [GO:0005507]; enzyme regulator activity [GO:0030234]	integral component of membrane [GO:0016021]; mitochondrial inner membrane [GO:0005743]; proteasome complex [GO:0000502]; copper ion binding [GO:0005507]; enzyme regulator activity [GO:0030234]; regulation of protein catabolic process [GO:0042176]	tr|A0A099NXT9|A0A099NXT9_PICKU Uncharacterized protein OS=Pichia kudriavzevii OX=4909 GN=JL09_g3424 PE=3 SV=1;tr|A0A1Z8JUA8|A0A1Z8JUA8_PICKU Uncharacterized protein OS=Pichia kudriavzevii OX=4909 GN=C5L36_0C05180 PE=4 SV=1	5	5	5	9.2	9.2	9.2	80.429	696	0.00035191	5.4291							By matching			By matching				By matching				By matching	By matching	80746000	0	0	0	0	0	0	882310	0
A0A099NXW8	unreviewed	Dynamin-related protein DNM1	BOH78_2907 C5L36_0A07960 CAS74_004171 JL09_g3154	A0A099NXW8	A0A099NXW8	Pichia kudriavzevii (Yeast) (Issatchenkia orientalis)	establishment of mitochondrion localization, microtubule-mediated [GO:0034643]; mitochondrial membrane fission [GO:0090149]; mitochondrion inheritance [GO:0000001]; peroxisome organization [GO:0007031]	cell division site [GO:0032153]; mitochondrion [GO:0005739]	GTPase activity [GO:0003924]; GTP binding [GO:0005525]	cell division site [GO:0032153]; mitochondrion [GO:0005739]; GTP binding [GO:0005525]; GTPase activity [GO:0003924]; establishment of mitochondrion localization, microtubule-mediated [GO:0034643]; mitochondrial membrane fission [GO:0090149]; mitochondrion inheritance [GO:0000001]; peroxisome organization [GO:0007031]	tr|A0A099NXW8|A0A099NXW8_PICKU Dynamin-related protein DNM1 OS=Pichia kudriavzevii OX=4909 GN=BOH78_2907 PE=3 SV=1	7	7	7	16.1	16.1	16.1	88.958	789	0	31.34	By matching	By matching	By matching		By matching									By matching	By matching	By matching				268110000	2237100	3469900	1660300	0	1053900	0	0	0
A0A099NY14	unreviewed	Eukaryotic translation initiation factor 5A (eIF-5A)	BOH78_2019 C5L36_0D04620 CAS74_002445 JL09_g4096	A0A099NY14	A0A099NY14	Pichia kudriavzevii (Yeast) (Issatchenkia orientalis)	positive regulation of translational elongation [GO:0045901]; positive regulation of translational termination [GO:0045905]		ribosome binding [GO:0043022]; translation elongation factor activity [GO:0003746]; translation initiation factor activity [GO:0003743]	ribosome binding [GO:0043022]; translation elongation factor activity [GO:0003746]; translation initiation factor activity [GO:0003743]; positive regulation of translational elongation [GO:0045901]; positive regulation of translational termination [GO:0045905]	tr|A0A099NY14|A0A099NY14_PICKU Eukaryotic translation initiation factor 5A OS=Pichia kudriavzevii OX=4909 GN=BOH78_2019 PE=3 SV=1	8	6	8	58	58	46.5	17.319	157	0	152.2	By matching	By matching	By matching	By matching				By matching	By matching	By matching	By matching	By matching	By matching	By matching		By matching	By MS/MS	By MS/MS	By MS/MS	8445600000	28289000	29853000	603180	13788000	0	0	0	1888700
A0A099NY20	unreviewed	Family of serine hydrolases 3	BOH78_2037 C5L36_0D04430 CAS74_002426 JL09_g4078	A0A099NY20	A0A099NY20	Pichia kudriavzevii (Yeast) (Issatchenkia orientalis)			hydrolase activity [GO:0016787]	hydrolase activity [GO:0016787]	tr|A0A099NY20|A0A099NY20_PICKU Family of serine hydrolases 3 OS=Pichia kudriavzevii OX=4909 GN=BOH78_2037 PE=4 SV=1	6	6	6	28.9	28.9	28.9	27.337	249	0.00028494	9.3416								By matching	By matching	By matching	By matching	By matching	By matching			By matching	By matching			274870000	0	0	0	0	0	0	0	782910
A0A099NY90	unreviewed	40S ribosomal protein S11	CAS74_001719 JL09_g3891	A0A099NY90;A0A1V2LS65	A0A099NY90;A0A1V2LS65	Pichia kudriavzevii (Yeast) (Issatchenkia orientalis)	translation [GO:0006412]	ribosome [GO:0005840]	structural constituent of ribosome [GO:0003735]	ribosome [GO:0005840]; structural constituent of ribosome [GO:0003735]; translation [GO:0006412]	tr|A0A099NY90|A0A099NY90_PICKU 40S ribosomal protein S11 OS=Pichia kudriavzevii OX=4909 GN=CAS74_001719 PE=3 SV=1;tr|A0A1V2LS65|A0A1V2LS65_PICKU Uncharacterized protein OS=Pichia kudriavzevii OX=4909 GN=BOH78_0979 PE=3 SV=1	5	4	5	36.3	36.3	29.5	16.611	146	0.00036666	6.0756						By matching			By matching		By matching	By matching					By matching		By matching	571020000	0	0	0	0	0	3680800	0	0
A0A099NYB6	unreviewed	Heat shock protein 78, mitochondrial	BOH78_3967 C5L36_0E05460 CAS74_002689 JL09_g3258	A0A099NYB6	A0A099NYB6	Pichia kudriavzevii (Yeast) (Issatchenkia orientalis)			ATPase activity [GO:0016887]; ATP binding [GO:0005524]	ATP binding [GO:0005524]; ATPase activity [GO:0016887]	tr|A0A099NYB6|A0A099NYB6_PICKU Heat shock protein 78, mitochondrial OS=Pichia kudriavzevii OX=4909 GN=BOH78_3967 PE=4 SV=1	18	16	18	30.8	30.8	27.9	87.49	767	0	280.09						By matching	By matching									By matching	By matching	By matching		1664300000	0	0	0	0	0	767940	207380	0
A0A099NYC0	unreviewed	40S ribosomal protein S12	BOH78_3556 C5L36_0C00590 CAS74_000053 JL09_g3183	A0A099NYC0	A0A099NYC0	Pichia kudriavzevii (Yeast) (Issatchenkia orientalis)	translation [GO:0006412]	cytosolic small ribosomal subunit [GO:0022627]	structural constituent of ribosome [GO:0003735]	cytosolic small ribosomal subunit [GO:0022627]; structural constituent of ribosome [GO:0003735]; translation [GO:0006412]	tr|A0A099NYC0|A0A099NYC0_PICKU 40S ribosomal protein S12 OS=Pichia kudriavzevii OX=4909 GN=BOH78_3556 PE=3 SV=1	9	8	9	81.8	81.8	74.8	15.52	143	0	323.31		By matching		By matching	By matching	By matching	By matching					By matching					By matching	By matching	By matching	7877000000	0	1487500	0	1280700	327900	400380	461280	0
A0A099NYC9	unreviewed	Putative pyridoxal 5'-phosphate synthase subunit SNZ3 (Pyridoxal 5'-phosphate synthase, synthase subunit Pdx1)	BOH78_3526 C5L36_0C00310 CAS74_000024 JL09_g3833	A0A099NYC9;M7WGI6;EMS19547.1;A0A120E884;A0A0P9EVD6;A0A2S5BE01	A0A099NYC9	Pichia kudriavzevii (Yeast) (Issatchenkia orientalis)	cysteine biosynthetic process from serine [GO:0006535]; pyridoxal phosphate biosynthetic process [GO:0042823]		catalytic activity [GO:0003824]	catalytic activity [GO:0003824]; cysteine biosynthetic process from serine [GO:0006535]; pyridoxal phosphate biosynthetic process [GO:0042823]	tr|A0A099NYC9|A0A099NYC9_PICKU Putative pyridoxal 5-phosphate synthase subunit SNZ3 OS=Pichia kudriavzevii OX=4909 GN=BOH78_3526 PE=3 SV=1	10	9	10	40.6	40.6	37.9	31.416	293	0	72.386	By matching	By matching	By matching	By matching	By matching	By matching										By matching				2012200000	8614000	9995000	5874400	7778400	6486600	5404700	0	0
A0A099NYE2	unreviewed	Peptidylprolyl isomerase (EC 5.2.1.8)	BOH78_0188 C5L36_0E01920 CAS74_003062 JL09_g3798	A0A099NYE2	A0A099NYE2	Pichia kudriavzevii (Yeast) (Issatchenkia orientalis)		membrane [GO:0016020]	FK506 binding [GO:0005528]; peptidyl-prolyl cis-trans isomerase activity [GO:0003755]	membrane [GO:0016020]; FK506 binding [GO:0005528]; peptidyl-prolyl cis-trans isomerase activity [GO:0003755]	tr|A0A099NYE2|A0A099NYE2_PICKU Peptidylprolyl isomerase OS=Pichia kudriavzevii OX=4909 GN=BOH78_0188 PE=4 SV=1	1	1	1	9.4	9.4	9.4	14.921	138	0.0002586	7.0942		By matching	By matching	By matching	By matching	By matching													By matching	60387000	0	846550	2356900	1797100	1775000	1879800	0	0
A0A099NYK8	unreviewed	eRF1_1 domain-containing protein (Fragment)	JL09_g3862	A0A099NYK8;A0A1V2LSB6;A0A061BEJ2	A0A099NYK8;A0A1V2LSB6	Pichia kudriavzevii (Yeast) (Issatchenkia orientalis)		cytoplasm [GO:0005737]	translation release factor activity [GO:0003747]	cytoplasm [GO:0005737]; translation release factor activity [GO:0003747]	tr|A0A099NYK8|A0A099NYK8_PICKU Uncharacterized protein (Fragment) OS=Pichia kudriavzevii OX=4909 GN=JL09_g3862 PE=4 SV=1;tr|A0A1V2LSB6|A0A1V2LSB6_PICKU Eukaryotic peptide chain release factor subunit 1 OS=Pichia kudriavzevii OX=4909 GN=BOH78_1005 PE=4 SV=1	7	5	5	23.7	17.3	17.3	46.758	417	0.00027053	7.9971		By matching					By matching			By matching	By matching				By matching		By matching	By matching	By matching	146820000	0	0	0	0	0	0	638840	0
A0A099NYL7	unreviewed	Phosphopyruvate hydratase (EC 4.2.1.11)	BOH78_3535 C5L36_0C00400 CAS74_000034 JL09_g3824	A0A099NYL7;A9YTT1	A0A099NYL7;A9YTT1	Pichia kudriavzevii (Yeast) (Issatchenkia orientalis)	glycolytic process [GO:0006096]	phosphopyruvate hydratase complex [GO:0000015]	magnesium ion binding [GO:0000287]; phosphopyruvate hydratase activity [GO:0004634]	phosphopyruvate hydratase complex [GO:0000015]; magnesium ion binding [GO:0000287]; phosphopyruvate hydratase activity [GO:0004634]; glycolytic process [GO:0006096]	tr|A0A099NYL7|A0A099NYL7_PICKU Enolase OS=Pichia kudriavzevii OX=4909 GN=BOH78_3535 PE=3 SV=1;tr|A9YTT1|A9YTT1_PICKU Enolase 1 (Fragment) OS=Pichia kudriavzevii OX=4909 GN=Eno1 PE=3 SV=1	20	17	19	64.8	62.9	57.9	46.94	437	0	323.31	By matching	By matching	By matching	By matching	By matching	By matching	By matching	By matching	By matching	By matching	By matching	By matching	By matching	By matching	By matching	By matching	By matching	By matching	By matching	315560000000	2083000	449900	0	304900	1200400	657840	2808100	1970500
A0A099NYR4	unreviewed	Uncharacterized protein	JL09_g3681	A0A099NYR4;A0A1Z8JN81;A0A1V2LUX5;A0A1V2LUE6	A0A099NYR4;A0A1Z8JN81;A0A1V2LUX5	Pichia kudriavzevii (Yeast) (Issatchenkia orientalis)			aspartic-type endopeptidase activity [GO:0004190]	aspartic-type endopeptidase activity [GO:0004190]	tr|A0A099NYR4|A0A099NYR4_PICKU Uncharacterized protein OS=Pichia kudriavzevii OX=4909 GN=JL09_g3681 PE=3 SV=1;tr|A0A1Z8JN81|A0A1Z8JN81_PICKU Uncharacterized protein OS=Pichia kudriavzevii OX=4909 GN=CAS74_003032 PE=4 SV=1;tr|A0A1V2LUX5|A0A1V2LUX5_PICKU Vac	7	7	7	8	8	8	147.4	1325	0	105.43							By matching	By matching									By matching	By matching		203240000	0	0	0	0	0	0	391780	501180
A0A099NYT5	unreviewed	ADP-ribosylation factor	C5L36_0D05580 CAS74_002539 JL09_g2915	A0A099NYT5	A0A099NYT5	Pichia kudriavzevii (Yeast) (Issatchenkia orientalis)		Golgi apparatus [GO:0005794]	GTP binding [GO:0005525]	Golgi apparatus [GO:0005794]; GTP binding [GO:0005525]	tr|A0A099NYT5|A0A099NYT5_PICKU ADP-ribosylation factor OS=Pichia kudriavzevii OX=4909 GN=C5L36_0D05580 PE=3 SV=1	7	2	7	48.1	48.1	12.7	20.365	181	0	46.268	By MS/MS	By MS/MS	By MS/MS	By MS/MS	By MS/MS	By MS/MS	By MS/MS	By MS/MS	By MS/MS	By MS/MS	By MS/MS	By matching	By MS/MS	By MS/MS	By MS/MS	By MS/MS	By MS/MS	By MS/MS	By MS/MS	3708600000	84893000	89312000	61426000	36967000	70354000	54904000	19019000	22680000
A0A099NYV0	unreviewed	Dolichol-phosphate mannosyltransferase subunit 1 (EC 2.4.1.83)	BOH78_4553 CAS74_001803 JL09_g3030	A0A099NYV0;A0A2U9QYD2	A0A099NYV0;A0A2U9QYD2	Pichia kudriavzevii (Yeast) (Issatchenkia orientalis)	protein glycosylation [GO:0006486]	endoplasmic reticulum [GO:0005783]	dolichyl-phosphate beta-D-mannosyltransferase activity [GO:0004582]	endoplasmic reticulum [GO:0005783]; dolichyl-phosphate beta-D-mannosyltransferase activity [GO:0004582]; protein glycosylation [GO:0006486]	tr|A0A099NYV0|A0A099NYV0_PICKU Dolichol-phosphate mannosyltransferase subunit 1 OS=Pichia kudriavzevii OX=4909 GN=BOH78_4553 PE=3 SV=1;tr|A0A2U9QYD2|A0A2U9QYD2_PICKU Dolichol-phosphate mannosyltransferase subunit 1 OS=Pichia kudriavzevii OX=4909 GN=C5L36_0	4	4	4	20.1	20.1	20.1	26.638	239	0.000453	4.9373	By matching		By matching				By matching								By matching	By matching				127560000	1995300	0	1714100	0	0	0	479760	0
A0A099NYV6	unreviewed	Peroxiredoxin TSA1	BOH78_3189 C5L36_0B01740 CAS74_003269 JL09_g3767	A0A099NYV6	A0A099NYV6	Pichia kudriavzevii (Yeast) (Issatchenkia orientalis)	cell redox homeostasis [GO:0045454]; cellular detoxification of hydrogen peroxide [GO:0061692]; hydrogen peroxide catabolic process [GO:0042744]; negative regulation of DNA-binding transcription factor activity [GO:0043433]; positive regulation of transcription from RNA polymerase II promoter in response to oxidative stress [GO:0036091]	cytoplasm [GO:0005737]; integral component of membrane [GO:0016021]	thioredoxin peroxidase activity [GO:0008379]; unfolded protein binding [GO:0051082]	cytoplasm [GO:0005737]; integral component of membrane [GO:0016021]; thioredoxin peroxidase activity [GO:0008379]; unfolded protein binding [GO:0051082]; cell redox homeostasis [GO:0045454]; cellular detoxification of hydrogen peroxide [GO:0061692]; hydrogen peroxide catabolic process [GO:0042744]; negative regulation of DNA-binding transcription factor activity [GO:0043433]; positive regulation …	tr|A0A099NYV6|A0A099NYV6_PICKU Peroxiredoxin TSA1 OS=Pichia kudriavzevii OX=4909 GN=BOH78_3189 PE=4 SV=1	6	4	5	43.9	40.3	35.2	21.828	196	0	240.99	By matching	By matching	By matching	By matching		By matching			By matching		By matching	By matching		By matching					By matching	3613700000	2870600	1438100	0	0	0	0	0	0
A0A099NYY4	unreviewed	S-adenosylmethionine synthase (EC 2.5.1.6)	C5L36_0A06070 CAS74_001809 JL09_g3024	A0A099NYY4	A0A099NYY4	Pichia kudriavzevii (Yeast) (Issatchenkia orientalis)	methionine metabolic process [GO:0006555]; one-carbon metabolic process [GO:0006730]; S-adenosylmethionine biosynthetic process [GO:0006556]		ATP binding [GO:0005524]; metal ion binding [GO:0046872]; methionine adenosyltransferase activity [GO:0004478]	ATP binding [GO:0005524]; metal ion binding [GO:0046872]; methionine adenosyltransferase activity [GO:0004478]; methionine metabolic process [GO:0006555]; one-carbon metabolic process [GO:0006730]; S-adenosylmethionine biosynthetic process [GO:0006556]	tr|A0A099NYY4|A0A099NYY4_PICKU S-adenosylmethionine synthase OS=Pichia kudriavzevii OX=4909 GN=C5L36_0A06070 PE=3 SV=1	18	1	9	66.1	34.2	5	42.039	383	0	93.732	By matching	By matching	By matching		By matching							By matching		By matching	By matching		By matching	By matching	By matching	1594500000	5463900	4371100	4228600	0	4574200	0	0	0
A0A099NYZ0	unreviewed	Uncharacterized protein	CAS74_003418 JL09_g2830	A0A099NYZ0;A0A2U9R174;A0A1V2LN52	A0A099NYZ0;A0A2U9R174;A0A1V2LN52	Pichia kudriavzevii (Yeast) (Issatchenkia orientalis)	double-strand break repair via nonhomologous end joining [GO:0006303]; mitochondria-associated ubiquitin-dependent protein catabolic process [GO:0072671]; ribophagy [GO:0034517]; ubiquitin recycling [GO:0010992]	cytoplasmic side of mitochondrial outer membrane [GO:0032473]; nucleus [GO:0005634]	protein-containing complex binding [GO:0044877]; ubiquitin binding [GO:0043130]; ubiquitin-dependent protein binding [GO:0140036]	cytoplasmic side of mitochondrial outer membrane [GO:0032473]; nucleus [GO:0005634]; protein-containing complex binding [GO:0044877]; ubiquitin binding [GO:0043130]; ubiquitin-dependent protein binding [GO:0140036]; double-strand break repair via nonhomologous end joining [GO:0006303]; mitochondria-associated ubiquitin-dependent protein catabolic process [GO:0072671]; ribophagy [GO:0034517]; ubiq…	tr|A0A099NYZ0|A0A099NYZ0_PICKU Uncharacterized protein OS=Pichia kudriavzevii OX=4909 GN=CAS74_003418 PE=4 SV=1;tr|A0A2U9R174|A0A2U9R174_PICKU Uncharacterized protein OS=Pichia kudriavzevii OX=4909 GN=C5L36_0B03150 PE=4 SV=1;tr|A0A1V2LN52|A0A1V2LN52_PICKU	3	3	3	6.6	6.6	6.6	79.447	701	0.00036179	5.8648									By matching	By matching		By matching	By matching					By matching		76352000	0	0	0	0	0	0	0	0
A0A099NZ17	unreviewed	Uridylate kinase (UK) (EC 2.7.4.14) (ATP:UMP phosphotransferase) (Deoxycytidylate kinase) (CK) (dCMP kinase) (Uridine monophosphate kinase) (UMP kinase) (UMPK)	URA6 JL09_g2829	A0A099NZ17;A0A1V2LQ63;A0A1Z8JL46;A0A1Z8JL41;Q6FKP3;A0A0W0DNE2	A0A099NZ17;A0A1V2LQ63;A0A1Z8JL46	Pichia kudriavzevii (Yeast) (Issatchenkia orientalis)	'de novo' pyrimidine nucleobase biosynthetic process [GO:0006207]; pyrimidine nucleotide biosynthetic process [GO:0006221]	cytoplasm [GO:0005737]; nucleus [GO:0005634]	ATP binding [GO:0005524]; cytidylate kinase activity [GO:0004127]; metal ion binding [GO:0046872]; uridylate kinase activity [GO:0009041]	cytoplasm [GO:0005737]; nucleus [GO:0005634]; ATP binding [GO:0005524]; cytidylate kinase activity [GO:0004127]; metal ion binding [GO:0046872]; uridylate kinase activity [GO:0009041]; 'de novo' pyrimidine nucleobase biosynthetic process [GO:0006207]; pyrimidine nucleotide biosynthetic process [GO:0006221]	tr|A0A099NZ17|A0A099NZ17_PICKU Uridylate kinase OS=Pichia kudriavzevii OX=4909 GN=URA6 PE=3 SV=1;tr|A0A1V2LQ63|A0A1V2LQ63_PICKU Uridylate kinase OS=Pichia kudriavzevii OX=4909 GN=URA6 PE=3 SV=1;tr|A0A1Z8JL46|A0A1Z8JL46_PICKU Uncharacterized protein OS=Pich	14	14	14	33.1	33.1	33.1	77.861	714	0	279.16								By matching		By matching	By matching		By matching			By matching	By matching	By matching	By matching	876030000	0	0	0	0	0	0	0	1696800
A0A099NZA9	unreviewed	Dihydrolipoyl dehydrogenase (EC 1.8.1.4)	BOH78_4864 C5L36_0A06300 JL09_g3584	A0A099NZA9;A0A1Z8JSE0;A0A1V2LDT0	A0A099NZA9;A0A1Z8JSE0	Pichia kudriavzevii (Yeast) (Issatchenkia orientalis)	2-oxoglutarate metabolic process [GO:0006103]; cell redox homeostasis [GO:0045454]; glycine catabolic process [GO:0006546]; hydrogen peroxide metabolic process [GO:0042743]; isoleucine catabolic process [GO:0006550]; leucine catabolic process [GO:0006552]; L-serine biosynthetic process [GO:0006564]; pyruvate metabolic process [GO:0006090]; valine catabolic process [GO:0006574]	glycine cleavage complex [GO:0005960]; mitochondrial nucleoid [GO:0042645]; mitochondrial oxoglutarate dehydrogenase complex [GO:0009353]; mitochondrial pyruvate dehydrogenase complex [GO:0005967]	dihydrolipoyl dehydrogenase activity [GO:0004148]; flavin adenine dinucleotide binding [GO:0050660]; glycine dehydrogenase (decarboxylating) activity [GO:0004375]; oxoglutarate dehydrogenase (succinyl-transferring) activity [GO:0004591]; pyruvate dehydrogenase activity [GO:0004738]	glycine cleavage complex [GO:0005960]; mitochondrial nucleoid [GO:0042645]; mitochondrial oxoglutarate dehydrogenase complex [GO:0009353]; mitochondrial pyruvate dehydrogenase complex [GO:0005967]; dihydrolipoyl dehydrogenase activity [GO:0004148]; flavin adenine dinucleotide binding [GO:0050660]; glycine dehydrogenase (decarboxylating) activity [GO:0004375]; oxoglutarate dehydrogenase (succinyl-…	tr|A0A099NZA9|A0A099NZA9_PICKU Dihydrolipoyl dehydrogenase OS=Pichia kudriavzevii OX=4909 GN=BOH78_4864 PE=3 SV=1;tr|A0A1Z8JSE0|A0A1Z8JSE0_PICKU Dihydrolipoyl dehydrogenase OS=Pichia kudriavzevii OX=4909 GN=CAS74_001833 PE=3 SV=1	16	11	16	42.8	42.8	30.1	52.906	488	0	41.538	By matching	By matching	By matching	By matching		By matching	By matching	By matching		By matching		By matching	By matching	By matching	By matching		By matching	By MS/MS	By MS/MS	1735200000	2145400	3126800	1890500	1719500	0	2421300	811210	1105900
A0A099NZE3	unreviewed	Tyrosine--tRNA ligase (EC 6.1.1.1) (Tyrosyl-tRNA synthetase)	BOH78_2083 C5L36_0B02510 CAS74_003351 JL09_g2673	A0A099NZE3	A0A099NZE3	Pichia kudriavzevii (Yeast) (Issatchenkia orientalis)	tyrosyl-tRNA aminoacylation [GO:0006437]	cytoplasm [GO:0005737]; nucleus [GO:0005634]	ATP binding [GO:0005524]; tyrosine-tRNA ligase activity [GO:0004831]	cytoplasm [GO:0005737]; nucleus [GO:0005634]; ATP binding [GO:0005524]; tyrosine-tRNA ligase activity [GO:0004831]; tyrosyl-tRNA aminoacylation [GO:0006437]	tr|A0A099NZE3|A0A099NZE3_PICKU Tyrosine--tRNA ligase OS=Pichia kudriavzevii OX=4909 GN=BOH78_2083 PE=3 SV=1	5	5	5	19.2	19.2	19.2	44.874	400	0.00028253	9.0812	By matching	By matching	By matching	By matching	By matching	By matching	By matching	By matching	By matching	By matching			By matching						By matching	236420000	2275300	2401400	2443500	3469200	4095600	2477900	1390600	334490
A0A099NZR3	unreviewed	Trehalase (EC 3.2.1.28) (Alpha-trehalose glucohydrolase)	JL09_g2484	A0A099NZR3;A0A2U9R7U1;A0A1V2LFU6;A0A1Z8JPS6;A0A1Z8JPE7;A0A1V2L7S4	A0A099NZR3;A0A2U9R7U1;A0A1V2LFU6;A0A1Z8JPS6	Pichia kudriavzevii (Yeast) (Issatchenkia orientalis)	lipid metabolic process [GO:0006629]; trehalose catabolic process [GO:0005993]	cytoplasm [GO:0005737]	alpha,alpha-trehalase activity [GO:0004555]; calcium ion binding [GO:0005509]; phosphoric diester hydrolase activity [GO:0008081]	cytoplasm [GO:0005737]; alpha,alpha-trehalase activity [GO:0004555]; calcium ion binding [GO:0005509]; phosphoric diester hydrolase activity [GO:0008081]; lipid metabolic process [GO:0006629]; trehalose catabolic process [GO:0005993]	tr|A0A099NZR3|A0A099NZR3_PICKU Trehalase OS=Pichia kudriavzevii OX=4909 GN=JL09_g2484 PE=3 SV=1;tr|A0A2U9R7U1|A0A2U9R7U1_PICKU Trehalase OS=Pichia kudriavzevii OX=4909 GN=C5L36_0D01960 PE=3 SV=1;tr|A0A1V2LFU6|A0A1V2LFU6_PICKU Trehalase OS=Pichia kudriavzev	9	8	9	10	10	9.3	149.25	1292	0	35.008					By matching	By matching			By matching	By matching	By matching						By matching	By matching	By matching	273820000	0	0	0	0	756630	674230	0	0
A0A099P003	unreviewed	Uncharacterized protein	BOH78_4780 C5L36_0D01560 CAS74_002116 JL09_g2610	A0A099P003	A0A099P003	Pichia kudriavzevii (Yeast) (Issatchenkia orientalis)		integral component of membrane [GO:0016021]		integral component of membrane [GO:0016021]	tr|A0A099P003|A0A099P003_PICKU Uncharacterized protein OS=Pichia kudriavzevii OX=4909 GN=BOH78_4780 PE=4 SV=1	2	2	2	12.3	12.3	12.3	22.506	204	0.0049196	1.9269						By matching											By matching		By matching	84762000	0	0	0	0	0	516200	0	0
A0A099P007	unreviewed	Inositol-3-phosphate synthase (EC 5.5.1.4)	BOH78_4837 CAS74_004982 JL09_g3376	A0A099P007;A0A2U9R0D9	A0A099P007;A0A2U9R0D9	Pichia kudriavzevii (Yeast) (Issatchenkia orientalis)	inositol biosynthetic process [GO:0006021]; phospholipid biosynthetic process [GO:0008654]	cytoplasm [GO:0005737]	inositol-3-phosphate synthase activity [GO:0004512]	cytoplasm [GO:0005737]; inositol-3-phosphate synthase activity [GO:0004512]; inositol biosynthetic process [GO:0006021]; phospholipid biosynthetic process [GO:0008654]	tr|A0A099P007|A0A099P007_PICKU Inositol-3-phosphate synthase OS=Pichia kudriavzevii OX=4909 GN=BOH78_4837 PE=4 SV=1;tr|A0A2U9R0D9|A0A2U9R0D9_PICKU Uncharacterized protein OS=Pichia kudriavzevii OX=4909 GN=C5L36_0B00110 PE=4 SV=1	19	17	19	52.9	52.9	46.9	57.738	516	0	323.31	By matching	By matching	By matching	By matching	By matching	By matching	By matching	By matching	By matching		By matching	By matching	By matching	By matching	By matching	By matching		By matching	By matching	7994800000	7279200	12431000	8769000	8625200	10059000	883090	401430	874380
A0A099P046	unreviewed	Uncharacterized protein	JL09_g2628	A0A099P046;A0A1V2LGA8;A0A1Z8JP73	A0A099P046;A0A1V2LGA8;A0A1Z8JP73	Pichia kudriavzevii (Yeast) (Issatchenkia orientalis)			ATP binding [GO:0005524]; protein kinase activity [GO:0004672]	ATP binding [GO:0005524]; protein kinase activity [GO:0004672]	tr|A0A099P046|A0A099P046_PICKU Uncharacterized protein OS=Pichia kudriavzevii OX=4909 GN=JL09_g2628 PE=4 SV=1;tr|A0A1V2LGA8|A0A1V2LGA8_PICKU Protein kinase dsk1 OS=Pichia kudriavzevii OX=4909 GN=BOH78_4678 PE=4 SV=1;tr|A0A1Z8JP73|A0A1Z8JP73_PICKU Uncharact	2	2	2	2.9	2.9	2.9	161.21	1434	0.00998	1.5599		By matching		By matching		By MS/MS						By matching	By matching							118520000	0	1667100	0	2506600	0	1785700	0	0
A0A099P061	unreviewed	Carboxypeptidase (EC 3.4.16.-)	BOH78_4486 C5L36_0B00410 CAS74_005010 JL09_g3349	A0A099P061	A0A099P061	Pichia kudriavzevii (Yeast) (Issatchenkia orientalis)	macroautophagy [GO:0016236]; phytochelatin biosynthetic process [GO:0046938]; zymogen activation [GO:0031638]	extracellular region [GO:0005576]; fungal-type vacuole lumen [GO:0000328]	serine-type carboxypeptidase activity [GO:0004185]	extracellular region [GO:0005576]; fungal-type vacuole lumen [GO:0000328]; serine-type carboxypeptidase activity [GO:0004185]; macroautophagy [GO:0016236]; phytochelatin biosynthetic process [GO:0046938]; zymogen activation [GO:0031638]	tr|A0A099P061|A0A099P061_PICKU Carboxypeptidase OS=Pichia kudriavzevii OX=4909 GN=BOH78_4486 PE=3 SV=1	11	11	11	27.5	27.5	27.5	61.932	546	0	55.516	By matching	By matching	By matching	By matching	By matching	By matching	By matching				By matching		By matching	By matching	By matching				By matching	923210000	1804100	1446500	1762000	1285400	794740	5230500	759880	0
A0A099P074	unreviewed	Elongation factor 1-alpha	BOH78_1254 BOH78_5261 C5L36_0B00290 C5L36_0C11190 CAS74_001137 JL09_g2204 JL09_g3359	A0A099P074;A0A1Z8JH21;A0A1V2LGD0;Q0ZIC5;A8DN51;M7X3K8;A0A061BDQ9;A0A140D527;Q4FZE5;A0A0K3CAU5;A0A194SBD2;C4YMX9;A0A1D8PTZ2	A0A099P074;A0A1Z8JH21;A0A1V2LGD0;Q0ZIC5	Pichia kudriavzevii (Yeast) (Issatchenkia orientalis)			GTPase activity [GO:0003924]; GTP binding [GO:0005525]; translation elongation factor activity [GO:0003746]	GTP binding [GO:0005525]; GTPase activity [GO:0003924]; translation elongation factor activity [GO:0003746]	tr|A0A099P074|A0A099P074_PICKU Elongation factor 1-alpha OS=Pichia kudriavzevii OX=4909 GN=BOH78_1254 PE=3 SV=1;tr|A0A1Z8JH21|A0A1Z8JH21_PICKU Elongation factor 1-alpha OS=Pichia kudriavzevii OX=4909 GN=CAS74_004999 PE=3 SV=1;tr|A0A1V2LGD0|A0A1V2LGD0_PICKU	22	8	22	58.5	58.5	19.4	49.919	458	0	323.31	By MS/MS	By MS/MS	By matching	By matching	By matching	By MS/MS	By MS/MS	By MS/MS	By MS/MS	By MS/MS	By MS/MS	By MS/MS	By matching	By MS/MS	By MS/MS	By MS/MS	By MS/MS	By MS/MS	By MS/MS	89893000000	42530000	18986000	13159000	8848800	7382000	7127400	13187000	71325000
A0A099P085	unreviewed	GTP-binding protein YPT6	BOH78_2274 JL09_g2477	A0A099P085;A0A1Z8JPK0;A0A2U9R7X7;A0A1L1SRS6;A0A061B773;M7XMF9;CDR42746.1;A0A1V2LBJ0;A0A2U9R8K9;B9WM58;A0A1D8PT80;C4YM78;Q0PD15;A0A2S5BII9;A0A0W0DKC7;O42819;Q0PD53;Q0PD54;Q3U4W5;A0A125PIM0;A0A194S5F6;D3YV69;A0A099NTF9;P35279;P61294;Q8BHD0	A0A099P085;A0A1Z8JPK0;A0A2U9R7X7;A0A1L1SRS6;A0A061B773;M7XMF9;CDR42746.1;A0A1V2LBJ0;A0A2U9R8K9;B9WM58;A0A1D8PT80;C4YM78;Q0PD15;A0A2S5BII9;A0A0W0DKC7;O42819;Q0PD53;Q0PD54;Q3U4W5;A0A125PIM0;A0A194S5F6;D3YV69;A0A099NTF9;P35279;P61294;Q8BHD0	Pichia kudriavzevii (Yeast) (Issatchenkia orientalis)			GTPase activity [GO:0003924]; GTP binding [GO:0005525]	GTP binding [GO:0005525]; GTPase activity [GO:0003924]	tr|A0A099P085|A0A099P085_PICKU GTP-binding protein YPT6 OS=Pichia kudriavzevii OX=4909 GN=BOH78_2274 PE=4 SV=1;tr|A0A1Z8JPK0|A0A1Z8JPK0_PICKU Uncharacterized protein OS=Pichia kudriavzevii OX=4909 GN=CAS74_002256 PE=4 SV=1;tr|A0A2U9R7X7|A0A2U9R7X7_PICKU Un	2	1	2	7.8	7.8	4.1	31.663	295	0	25.758	By MS/MS	By MS/MS	By MS/MS	By MS/MS	By MS/MS	By MS/MS	By MS/MS	By MS/MS	By MS/MS	By MS/MS	By MS/MS	By MS/MS	By MS/MS	By MS/MS	By matching	By matching	By MS/MS	By MS/MS	By MS/MS	1559900000	30860000	28250000	22489000	19148000	18295000	15206000	14750000	17380000
A0A099P086	unreviewed	Sphingolipid long chain base-responsive protein LSP1	C5L36_0E05550 CAS74_002679 JL09_g3247	A0A099P086;A0A1V2LK19	A0A099P086;A0A1V2LK19	Pichia kudriavzevii (Yeast) (Issatchenkia orientalis)					tr|A0A099P086|A0A099P086_PICKU Sphingolipid long chain base-responsive protein LSP1 OS=Pichia kudriavzevii OX=4909 GN=C5L36_0E05550 PE=4 SV=1;tr|A0A1V2LK19|A0A1V2LK19_PICKU Sphingolipid long chain base-responsive protein LSP1 OS=Pichia kudriavzevii OX=4909	14	8	9	53.4	37.2	34.1	36.925	328	0	323.31	By matching	By matching				By matching	By matching	By matching		By matching	By matching		By matching		By matching	By matching	By MS/MS	By MS/MS	By MS/MS	2874600000	582410	0	0	0	0	0	2620900	479310
A0A099P087	unreviewed	J domain-containing protein	JL09_g2405	A0A099P087;A0A1Z8JPW6;A0A1V2LES3;A0A2U9R8T7	A0A099P087;A0A1Z8JPW6;A0A1V2LES3;A0A2U9R8T7	Pichia kudriavzevii (Yeast) (Issatchenkia orientalis)	cytosol to endoplasmic reticulum transport [GO:0046967]; posttranslational protein targeting to membrane, translocation [GO:0031204]; SRP-dependent cotranslational protein targeting to membrane [GO:0006614]	integral component of membrane [GO:0016021]; Sec62/Sec63 complex [GO:0031207]	protein transmembrane transporter activity [GO:0008320]	integral component of membrane [GO:0016021]; Sec62/Sec63 complex [GO:0031207]; protein transmembrane transporter activity [GO:0008320]; cytosol to endoplasmic reticulum transport [GO:0046967]; posttranslational protein targeting to membrane, translocation [GO:0031204]; SRP-dependent cotranslational protein targeting to membrane [GO:0006614]	tr|A0A099P087|A0A099P087_PICKU Uncharacterized protein OS=Pichia kudriavzevii OX=4909 GN=JL09_g2405 PE=4 SV=1;tr|A0A1Z8JPW6|A0A1Z8JPW6_PICKU Uncharacterized protein OS=Pichia kudriavzevii OX=4909 GN=CAS74_002333 PE=4 SV=1;tr|A0A1V2LES3|A0A1V2LES3_PICKU Pro	5	5	5	14.4	14.4	14.4	66.074	584	0.0003672	6.1052	By matching	By matching	By matching	By matching	By matching															58413000	1760500	1633800	1098000	1896900	2693700	0	0	0
A0A099P0I2	unreviewed	Tryptophanyl-tRNA synthetase (EC 6.1.1.2)	BOH78_4566 C5L36_0A05820 CAS74_001785 JL09_g3043	A0A099P0I2;A0A1V2L842	A0A099P0I2	Pichia kudriavzevii (Yeast) (Issatchenkia orientalis)	tryptophanyl-tRNA aminoacylation [GO:0006436]		ATP binding [GO:0005524]; tryptophan-tRNA ligase activity [GO:0004830]	ATP binding [GO:0005524]; tryptophan-tRNA ligase activity [GO:0004830]; tryptophanyl-tRNA aminoacylation [GO:0006436]	tr|A0A099P0I2|A0A099P0I2_PICKU Tryptophan--tRNA ligase, cytoplasmic OS=Pichia kudriavzevii OX=4909 GN=BOH78_4566 PE=3 SV=1	6	6	6	20	20	20	48.619	426	0.00018556	19.508										By matching	By matching	By matching					By matching			132420000	0	0	0	0	0	0	0	0
A0A099P0I3	unreviewed	Protein disulfide-isomerase domain (Protein disulfide-isomerase erp38)	BOH78_3726 C5L36_0B08210 CAS74_004013 JL09_g2283	A0A099P0I3	A0A099P0I3	Pichia kudriavzevii (Yeast) (Issatchenkia orientalis)		endoplasmic reticulum [GO:0005783]	isomerase activity [GO:0016853]	endoplasmic reticulum [GO:0005783]; isomerase activity [GO:0016853]	tr|A0A099P0I3|A0A099P0I3_PICKU Protein disulfide-isomerase domain OS=Pichia kudriavzevii OX=4909 GN=BOH78_3726 PE=4 SV=1	11	11	11	34.3	34.3	34.3	45.134	394	0	123.06	By matching																By matching	By matching	By matching	1315900000	1105900	0	0	0	0	0	0	0
A0A099P0J8	unreviewed	Coproporphyrinogen oxidase (EC 1.3.3.3)	BOH78_5020 C5L36_0A05650 CAS74_001766 JL09_g3062	A0A099P0J8;A0A1V2LBN1	A0A099P0J8;A0A1V2LBN1	Pichia kudriavzevii (Yeast) (Issatchenkia orientalis)	protoporphyrinogen IX biosynthetic process [GO:0006782]	cytosol [GO:0005829]	coproporphyrinogen oxidase activity [GO:0004109]	cytosol [GO:0005829]; coproporphyrinogen oxidase activity [GO:0004109]; protoporphyrinogen IX biosynthetic process [GO:0006782]	tr|A0A099P0J8|A0A099P0J8_PICKU Oxygen-dependent coproporphyrinogen-III oxidase OS=Pichia kudriavzevii OX=4909 GN=BOH78_5020 PE=4 SV=1;tr|A0A1V2LBN1|A0A1V2LBN1_PICKU Oxygen-dependent coproporphyrinogen-III oxidase (Fragment) OS=Pichia kudriavzevii OX=4909 G	15	14	15	58.5	58.5	55.3	36.305	318	0	323.31	By matching	By matching	By matching	By matching	By matching	By matching	By matching		By matching			By matching	By matching				By matching		By matching	18417000000	4824300	1813300	3524200	846060	1457900	644810	842000	0
A0A099P0R9	unreviewed	Peptidylprolyl isomerase (EC 5.2.1.8)	BOH78_3458 CAS74_002055 JL09_g3120	A0A099P0R9;A0A2U9R8D7	A0A099P0R9;A0A2U9R8D7	Pichia kudriavzevii (Yeast) (Issatchenkia orientalis)			peptidyl-prolyl cis-trans isomerase activity [GO:0003755]	peptidyl-prolyl cis-trans isomerase activity [GO:0003755]	tr|A0A099P0R9|A0A099P0R9_PICKU Peptidylprolyl isomerase OS=Pichia kudriavzevii OX=4909 GN=BOH78_3458 PE=4 SV=1;tr|A0A2U9R8D7|A0A2U9R8D7_PICKU Peptidylprolyl isomerase OS=Pichia kudriavzevii OX=4909 GN=C5L36_0D00940 PE=4 SV=1	3	3	3	44.2	44.2	44.2	12.321	113	0	43.361														By matching			By matching	By matching	By matching	883820000	0	0	0	0	0	0	0	0
A0A099P0T1	unreviewed	Sphingolipid long chain base-responsive protein PIL1	BOH78_4933 CAS74_001775 JL09_g3053	A0A099P0T1;A0A2U9QYC9	A0A099P0T1;A0A2U9QYC9	Pichia kudriavzevii (Yeast) (Issatchenkia orientalis)					tr|A0A099P0T1|A0A099P0T1_PICKU Sphingolipid long chain base-responsive protein PIL1 OS=Pichia kudriavzevii OX=4909 GN=BOH78_4933 PE=4 SV=1;tr|A0A2U9QYC9|A0A2U9QYC9_PICKU Uncharacterized protein OS=Pichia kudriavzevii OX=4909 GN=C5L36_0A05730 PE=4 SV=1	13	8	8	68.3	50.8	50.8	34.826	309	0	323.31	By matching	By matching			By matching	By matching			By matching	By matching		By matching					By matching	By matching	By matching	2255800000	2137400	1276000	0	0	1462900	0	0	0
A0A099P0Y5	unreviewed	Mannan endo-1,6-alpha-mannosidase (EC 3.2.1.101)	BOH78_3728 CAS74_004015 JL09_g2281	A0A099P0Y5;A0A2U9R2M8	A0A099P0Y5;A0A2U9R2M8	Pichia kudriavzevii (Yeast) (Issatchenkia orientalis)	budding cell bud growth [GO:0007117]; carbohydrate catabolic process [GO:0016052]; fungal-type cell wall biogenesis [GO:0009272]; pseudohyphal growth [GO:0007124]	plasma membrane [GO:0005886]	mannan endo-1,6-alpha-mannosidase activity [GO:0008496]	plasma membrane [GO:0005886]; mannan endo-1,6-alpha-mannosidase activity [GO:0008496]; budding cell bud growth [GO:0007117]; carbohydrate catabolic process [GO:0016052]; fungal-type cell wall biogenesis [GO:0009272]; pseudohyphal growth [GO:0007124]	tr|A0A099P0Y5|A0A099P0Y5_PICKU Mannan endo-1,6-alpha-mannosidase OS=Pichia kudriavzevii OX=4909 GN=BOH78_3728 PE=3 SV=1;tr|A0A2U9R2M8|A0A2U9R2M8_PICKU Uncharacterized protein OS=Pichia kudriavzevii OX=4909 GN=C5L36_0B08180 PE=4 SV=1	6	6	6	22.7	22.7	22.7	50.615	459	0	104.37	By matching	By matching					By matching						By matching			By matching				564370000	1365400	1230700	0	0	0	0	361960	0
A0A099P154	unreviewed	3-hydroxy-3-methylglutaryl coenzyme A synthase (HMG-CoA synthase) (EC 2.3.3.10)	BOH78_1273 C5L36_0C11390 CAS74_001158 JL09_g2184	A0A099P154;A0A1V2KZD8;B9WMT2	A0A099P154	Pichia kudriavzevii (Yeast) (Issatchenkia orientalis)	acetyl-CoA metabolic process [GO:0006084]; ergosterol biosynthetic process [GO:0006696]; farnesyl diphosphate biosynthetic process, mevalonate pathway [GO:0010142]		hydroxymethylglutaryl-CoA synthase activity [GO:0004421]	hydroxymethylglutaryl-CoA synthase activity [GO:0004421]; acetyl-CoA metabolic process [GO:0006084]; ergosterol biosynthetic process [GO:0006696]; farnesyl diphosphate biosynthetic process, mevalonate pathway [GO:0010142]	tr|A0A099P154|A0A099P154_PICKU 3-hydroxy-3-methylglutaryl coenzyme A synthase OS=Pichia kudriavzevii OX=4909 GN=BOH78_1273 PE=3 SV=1	15	14	15	55.8	55.8	53.4	49.637	446	0	58.599							By matching	By matching	By matching	By matching	By matching						By matching	By matching	By MS/MS	5165400000	0	0	0	0	0	0	5158100	2843900
A0A099P156	unreviewed	NADH dehydrogenase (Quinone), G subunit (NADH-ubiquinone oxidoreductase 78 kDa subunit, mitochondrial)	BOH78_1885 C5L36_0D06100 CAS74_002589 JL09_g2996	A0A099P156;A0A099NUS5	A0A099P156;A0A099NUS5	Pichia kudriavzevii (Yeast) (Issatchenkia orientalis)	ATP synthesis coupled electron transport [GO:0042773]	mitochondrial inner membrane [GO:0005743]	4 iron, 4 sulfur cluster binding [GO:0051539]; electron transfer activity [GO:0009055]; metal ion binding [GO:0046872]; NADH dehydrogenase (ubiquinone) activity [GO:0008137]	mitochondrial inner membrane [GO:0005743]; 4 iron, 4 sulfur cluster binding [GO:0051539]; electron transfer activity [GO:0009055]; metal ion binding [GO:0046872]; NADH dehydrogenase (ubiquinone) activity [GO:0008137]; ATP synthesis coupled electron transport [GO:0042773]	tr|A0A099P156|A0A099P156_PICKU NADH dehydrogenase (Quinone), G subunit OS=Pichia kudriavzevii OX=4909 GN=BOH78_1885 PE=3 SV=1;tr|A0A099NUS5|A0A099NUS5_PICKU Uncharacterized protein (Fragment) OS=Pichia kudriavzevii OX=4909 GN=JL09_g5116 PE=3 SV=1	8	8	8	17.6	17.6	17.6	79.219	727	0	134.45		By matching	By matching	By matching			By matching		By matching		By matching	By matching					By matching	By matching	By matching	365130000	0	788520	1205000	309660	0	0	2162100	0
A0A099P176	unreviewed	Putative peroxisomal peroxiredoxin	BOH78_1961 BOH78_5462 C5L36_0D05270 JL09_g2943	A0A099P176;A0A1Z8JQ75	A0A099P176;A0A1Z8JQ75	Pichia kudriavzevii (Yeast) (Issatchenkia orientalis)			peroxidase activity [GO:0004601]	peroxidase activity [GO:0004601]	tr|A0A099P176|A0A099P176_PICKU Putative peroxisomal peroxiredoxin OS=Pichia kudriavzevii OX=4909 GN=BOH78_1961 PE=4 SV=1;tr|A0A1Z8JQ75|A0A1Z8JQ75_PICKU Uncharacterized protein OS=Pichia kudriavzevii OX=4909 GN=CAS74_002508 PE=4 SV=1	5	5	5	55.7	55.7	55.7	19.729	183	0	36.769							By matching		By matching	By matching							By matching		By matching	177830000	0	0	0	0	0	0	569460	0
A0A099P1D1	unreviewed	Pyridoxal 5'-phosphate synthase (EC 1.4.3.5)	BOH78_1872 C5L36_0D06230 CAS74_002600 JL09_g3008	A0A099P1D1	A0A099P1D1	Pichia kudriavzevii (Yeast) (Issatchenkia orientalis)	pyridoxine biosynthetic process [GO:0008615]		FMN binding [GO:0010181]; pyridoxamine-phosphate oxidase activity [GO:0004733]	FMN binding [GO:0010181]; pyridoxamine-phosphate oxidase activity [GO:0004733]; pyridoxine biosynthetic process [GO:0008615]	tr|A0A099P1D1|A0A099P1D1_PICKU Pyridoxamine 5-phosphate oxidase OS=Pichia kudriavzevii OX=4909 GN=BOH78_1872 PE=4 SV=1	7	7	7	35.9	35.9	35.9	27.214	231	0	69.806										By matching		By matching	By matching	By matching				By matching	By matching	593960000	0	0	0	0	0	0	0	0
A0A099P1G8	unreviewed	60S ribosomal protein L8	BOH78_2182 C5L36_0B03530 CAS74_003455 JL09_g2796	A0A099P1G8;A0A2U9R8U6;A0A1Z8JPS3;A0A099NXX4	A0A099P1G8;A0A2U9R8U6;A0A1Z8JPS3;A0A099NXX4	Pichia kudriavzevii (Yeast) (Issatchenkia orientalis)	ribosome biogenesis [GO:0042254]	cytosolic large ribosomal subunit [GO:0022625]	RNA binding [GO:0003723]	cytosolic large ribosomal subunit [GO:0022625]; RNA binding [GO:0003723]; ribosome biogenesis [GO:0042254]	tr|A0A099P1G8|A0A099P1G8_PICKU 60S ribosomal protein L8-B OS=Pichia kudriavzevii OX=4909 GN=BOH78_2182 PE=4 SV=1;tr|A0A2U9R8U6|A0A2U9R8U6_PICKU Uncharacterized protein OS=Pichia kudriavzevii OX=4909 GN=C5L36_0D03640 PE=4 SV=1;tr|A0A1Z8JPS3|A0A1Z8JPS3_PICKU	11	10	11	50.8	50.8	47.3	28.509	262	0	33.9		By matching	By matching	By matching	By matching	By matching	By matching					By matching	By matching	By matching	By matching	By matching	By matching		By matching	3945400000	0	891940	1292000	430690	361030	1896900	461590	0
A0A099P1I2	unreviewed	S10_plectin domain-containing protein	BOH78_3829 CAS74_002733 JL09_g1907	A0A099P1I2;A0A2U9RBB1	A0A099P1I2;A0A2U9RBB1	Pichia kudriavzevii (Yeast) (Issatchenkia orientalis)		ribosome [GO:0005840]		ribosome [GO:0005840]	tr|A0A099P1I2|A0A099P1I2_PICKU Uncharacterized protein OS=Pichia kudriavzevii OX=4909 GN=BOH78_3829 PE=4 SV=1;tr|A0A2U9RBB1|A0A2U9RBB1_PICKU Uncharacterized protein OS=Pichia kudriavzevii OX=4909 GN=C5L36_0E05040 PE=4 SV=1	5	5	5	43.2	43.2	43.2	14.015	118	0	130.34	By matching	By matching	By matching		By matching		By matching	By matching						By matching		By matching	By matching			3215300000	1385500	2114500	1341800	0	1175600	0	2755800	3237800
A0A099P1I6	unreviewed	(R,R)-butanediol dehydrogenase	BOH78_2043 C5L36_0B02110 CAS74_003308 JL09_g2633	A0A099P1I6	A0A099P1I6	Pichia kudriavzevii (Yeast) (Issatchenkia orientalis)			oxidoreductase activity [GO:0016491]; zinc ion binding [GO:0008270]	oxidoreductase activity [GO:0016491]; zinc ion binding [GO:0008270]	tr|A0A099P1I6|A0A099P1I6_PICKU (R,R)-butanediol dehydrogenase OS=Pichia kudriavzevii OX=4909 GN=BOH78_2043 PE=3 SV=1	11	11	11	42.1	42.1	42.1	41.316	380	0	81.337		By matching						By matching	By matching						By matching		By matching	By matching		2927000000	0	1383200	0	0	0	0	0	757530
A0A099P1N2	unreviewed	Alcohol dehydrogenase 4, mitochondrial	BOH78_0543 C5L36_0B10480 JL09_g2716	A0A099P1N2;A0A1Z8JIQ6;A0A099NTF6	A0A099P1N2;A0A1Z8JIQ6	Pichia kudriavzevii (Yeast) (Issatchenkia orientalis)			oxidoreductase activity [GO:0016491]; zinc ion binding [GO:0008270]	oxidoreductase activity [GO:0016491]; zinc ion binding [GO:0008270]	tr|A0A099P1N2|A0A099P1N2_PICKU Alcohol dehydrogenase 4, mitochondrial OS=Pichia kudriavzevii OX=4909 GN=BOH78_0543 PE=3 SV=1;tr|A0A1Z8JIQ6|A0A1Z8JIQ6_PICKU Alcohol dehydrogenase 4, mitochondrial OS=Pichia kudriavzevii OX=4909 GN=CAS74_004715 PE=3 SV=1	20	18	20	79.4	79.4	72.3	37.048	350	0	323.31	By matching	By matching		By matching		By matching		By matching		By matching	By matching	By matching	By matching	By matching			By matching	By matching	By matching	64314000000	19384000	13751000	0	1094700	0	3497100	0	513330
A0A099P1N8	unreviewed	Uncharacterized protein	BOH78_4628 C5L36_0B07040 CAS74_004130 JL09_g2842	A0A099P1N8	A0A099P1N8	Pichia kudriavzevii (Yeast) (Issatchenkia orientalis)					tr|A0A099P1N8|A0A099P1N8_PICKU Uncharacterized protein OS=Pichia kudriavzevii OX=4909 GN=BOH78_4628 PE=4 SV=1	5	5	5	27.5	27.5	27.5	34.779	302	0.00027082	8.0134					By matching					By matching	By matching				By matching		By matching	By matching		148450000	0	0	0	0	425370	0	0	0
A0A099P1R1	unreviewed	Ribosomal protein L15	BOH78_3783 C5L36_0E04570 CAS74_002783 JL09_g1954	A0A099P1R1	A0A099P1R1	Pichia kudriavzevii (Yeast) (Issatchenkia orientalis)	translation [GO:0006412]	ribosome [GO:0005840]	structural constituent of ribosome [GO:0003735]	ribosome [GO:0005840]; structural constituent of ribosome [GO:0003735]; translation [GO:0006412]	tr|A0A099P1R1|A0A099P1R1_PICKU Ribosomal protein L15 OS=Pichia kudriavzevii OX=4909 GN=BOH78_3783 PE=3 SV=1	4	3	4	28.9	28.9	21.1	24.341	204	0.00027364	8.2756																		By matching	By matching	439270000	0	0	0	0	0	0	0	0
A0A099P1R9	unreviewed	ATP synthase subunit d, mitochondrial	BOH78_3250 CAS74_005083 JL09_g2023	A0A099P1R9;A0A2U9R0N9	A0A099P1R9;A0A2U9R0N9	Pichia kudriavzevii (Yeast) (Issatchenkia orientalis)		mitochondrial proton-transporting ATP synthase, stator stalk [GO:0000274]	proton-transporting ATP synthase activity, rotational mechanism [GO:0046933]	mitochondrial proton-transporting ATP synthase, stator stalk [GO:0000274]; proton-transporting ATP synthase activity, rotational mechanism [GO:0046933]	tr|A0A099P1R9|A0A099P1R9_PICKU ATP synthase subunit d, mitochondrial OS=Pichia kudriavzevii OX=4909 GN=BOH78_3250 PE=3 SV=1;tr|A0A2U9R0N9|A0A2U9R0N9_PICKU ATP synthase subunit d, mitochondrial OS=Pichia kudriavzevii OX=4909 GN=C5L36_0B01110 PE=3 SV=1	8	8	8	46.8	46.8	46.8	19.146	173	0	57.197	By matching		By matching	By matching	By matching	By matching		By matching		By matching			By matching			By matching		By matching		833960000	2791900	0	1733700	4676300	162410	1464600	0	1007700
A0A099P1T1	unreviewed	Myosin regulatory light chain cdc4	BOH78_4688 C5L36_0D01680 CAS74_002132 JL09_g2618	A0A099P1T1	A0A099P1T1	Pichia kudriavzevii (Yeast) (Issatchenkia orientalis)			calcium ion binding [GO:0005509]	calcium ion binding [GO:0005509]	tr|A0A099P1T1|A0A099P1T1_PICKU Myosin regulatory light chain cdc4 OS=Pichia kudriavzevii OX=4909 GN=BOH78_4688 PE=4 SV=1	7	6	7	66.9	66.9	60.6	15.685	142	0	151.98					By matching	By matching			By matching				By matching		By matching	By matching			By matching	1051000000	0	0	0	0	859400	541960	0	0
A0A099P1W6	unreviewed	NADH-cytochrome b5 reductase (EC 1.6.2.2)	BOH78_4676 CAS74_002143 JL09_g2629	A0A099P1W6;A0A2U9R848	A0A099P1W6;A0A2U9R848	Pichia kudriavzevii (Yeast) (Issatchenkia orientalis)			cytochrome-b5 reductase activity, acting on NAD(P)H [GO:0004128]; NADH dehydrogenase activity [GO:0003954]	cytochrome-b5 reductase activity, acting on NAD(P)H [GO:0004128]; NADH dehydrogenase activity [GO:0003954]	tr|A0A099P1W6|A0A099P1W6_PICKU NADH-cytochrome b5 reductase OS=Pichia kudriavzevii OX=4909 GN=BOH78_4676 PE=3 SV=1;tr|A0A2U9R848|A0A2U9R848_PICKU NADH-cytochrome b5 reductase OS=Pichia kudriavzevii OX=4909 GN=C5L36_0D01790 PE=3 SV=1	3	3	3	11.8	11.8	11.8	30.906	279	0.00093257	2.8193											By matching	By matching								212000000	0	0	0	0	0	0	0	0
A0A099P1Y0	unreviewed	Protein HMF1	BOH78_0546 JL09_g2713	A0A099P1Y0;A0A1Z8JIQ3	A0A099P1Y0;A0A1Z8JIQ3	Pichia kudriavzevii (Yeast) (Issatchenkia orientalis)					tr|A0A099P1Y0|A0A099P1Y0_PICKU Protein HMF1 OS=Pichia kudriavzevii OX=4909 GN=BOH78_0546 PE=4 SV=1;tr|A0A1Z8JIQ3|A0A1Z8JIQ3_PICKU Uncharacterized protein OS=Pichia kudriavzevii OX=4909 GN=C5L36_0B10510 PE=4 SV=1	6	6	6	75.2	75.2	75.2	13.409	125	0	67.922																		By matching	By matching	252570000	0	0	0	0	0	0	0	0
A0A099P213	unreviewed	Protein TOXD	BOH78_0531 C5L36_0B10350 CAS74_004730 JL09_g2728	A0A099P213	A0A099P213	Pichia kudriavzevii (Yeast) (Issatchenkia orientalis)			oxidoreductase activity [GO:0016491]	oxidoreductase activity [GO:0016491]	tr|A0A099P213|A0A099P213_PICKU Protein TOXD OS=Pichia kudriavzevii OX=4909 GN=BOH78_0531 PE=4 SV=1	13	13	13	60.8	60.8	60.8	39.981	370	0	323.31	By matching				By matching						By matching	By matching	By matching			By matching				2751500000	652910	0	0	0	758400	0	0	0
A0A099P255	unreviewed	Assimilatory sulfite reductase (NADPH) (EC 1.8.1.2)	C5L36_0B12340 JL09_g1846	A0A099P255;A0A1Z8JIM0;A0A194S1M3;A0A109FHZ3;M7WL95;A0A061AQ83;A0A2T0AI44;A0A0K3C730	A0A099P255;A0A1Z8JIM0	Pichia kudriavzevii (Yeast) (Issatchenkia orientalis)	cysteine biosynthetic process [GO:0019344]; hydrogen sulfide biosynthetic process [GO:0070814]; sulfate assimilation [GO:0000103]	sulfite reductase complex (NADPH) [GO:0009337]	4 iron, 4 sulfur cluster binding [GO:0051539]; FMN binding [GO:0010181]; heme binding [GO:0020037]; metal ion binding [GO:0046872]; NADP binding [GO:0050661]; sulfite reductase (NADPH) activity [GO:0004783]	sulfite reductase complex (NADPH) [GO:0009337]; 4 iron, 4 sulfur cluster binding [GO:0051539]; FMN binding [GO:0010181]; heme binding [GO:0020037]; metal ion binding [GO:0046872]; NADP binding [GO:0050661]; sulfite reductase (NADPH) activity [GO:0004783]; cysteine biosynthetic process [GO:0019344]; hydrogen sulfide biosynthetic process [GO:0070814]; sulfate assimilation [GO:0000103]	tr|A0A099P255|A0A099P255_PICKU Uncharacterized protein OS=Pichia kudriavzevii OX=4909 GN=C5L36_0B12340 PE=4 SV=1;tr|A0A1Z8JIM0|A0A1Z8JIM0_PICKU Uncharacterized protein OS=Pichia kudriavzevii OX=4909 GN=CAS74_004529 PE=4 SV=1	27	2	27	31.4	31.4	3.2	153.93	1377	0	286.47						By matching	By matching	By matching	By matching	By matching	By matching	By matching				By matching	By matching	By matching	By matching	1957100000	0	0	0	0	0	654280	798900	1125300
A0A099P283	unreviewed	Polyadenylate-binding protein (PABP)	BOH78_2085 C5L36_0B02530 JL09_g2675	A0A099P283;A0A1Z8JKX8;A0A099NS00	A0A099P283;A0A1Z8JKX8	Pichia kudriavzevii (Yeast) (Issatchenkia orientalis)	mRNA processing [GO:0006397]; mRNA transport [GO:0051028]; regulation of translation [GO:0006417]	cytoplasm [GO:0005737]	RNA binding [GO:0003723]	cytoplasm [GO:0005737]; RNA binding [GO:0003723]; mRNA processing [GO:0006397]; mRNA transport [GO:0051028]; regulation of translation [GO:0006417]	tr|A0A099P283|A0A099P283_PICKU Polyadenylate-binding protein OS=Pichia kudriavzevii OX=4909 GN=BOH78_2085 PE=3 SV=1;tr|A0A1Z8JKX8|A0A1Z8JKX8_PICKU Polyadenylate-binding protein OS=Pichia kudriavzevii OX=4909 GN=CAS74_003353 PE=3 SV=1	15	15	15	33.9	33.9	33.9	69.042	613	0	282.51	By matching		By matching	By matching	By matching	By matching	By matching				By matching	By matching		By matching				By matching	By matching	1804700000	5385400	0	1584300	1800900	774660	277930	367100	0
A0A099P2B8	unreviewed	Adenylosuccinate lyase (ASL) (EC 4.3.2.2) (Adenylosuccinase)	BOH78_0701 BOH78_5363 C5L36_0A02440 JL09_g1613	A0A099P2B8;A0A1Z8JRC0;A0A1V2LEW6	A0A099P2B8;A0A1Z8JRC0	Pichia kudriavzevii (Yeast) (Issatchenkia orientalis)	'de novo' AMP biosynthetic process [GO:0044208]; 'de novo' IMP biosynthetic process [GO:0006189]; fumarate metabolic process [GO:0006106]		(S)-2-(5-amino-1-(5-phospho-D-ribosyl)imidazole-4-carboxamido)succinate AMP-lyase (fumarate-forming) activity [GO:0070626]; N6-(1,2-dicarboxyethyl)AMP AMP-lyase (fumarate-forming) activity [GO:0004018]	(S)-2-(5-amino-1-(5-phospho-D-ribosyl)imidazole-4-carboxamido)succinate AMP-lyase (fumarate-forming) activity [GO:0070626]; N6-(1,2-dicarboxyethyl)AMP AMP-lyase (fumarate-forming) activity [GO:0004018]; 'de novo' AMP biosynthetic process [GO:0044208]; 'de novo' IMP biosynthetic process [GO:0006189]; fumarate metabolic process [GO:0006106]	tr|A0A099P2B8|A0A099P2B8_PICKU Adenylosuccinate lyase OS=Pichia kudriavzevii OX=4909 GN=BOH78_0701 PE=3 SV=1;tr|A0A1Z8JRC0|A0A1Z8JRC0_PICKU Adenylosuccinate lyase OS=Pichia kudriavzevii OX=4909 GN=CAS74_001444 PE=4 SV=1	9	3	3	24.1	9.3	9.3	54.903	482	0.00030414	11.217	By matching	By matching	By matching			By matching	By matching	By matching		By matching	By matching	By matching							By matching	156160000	1393300	1752900	1595200	0	0	949330	1744200	3150400
A0A099P2R2	unreviewed	HATPase_c domain-containing protein	JL09_g2357	A0A099P2R2;A0A1Z8JM06;A0A1V2LLV5;Q8NKE7;A0A099NRQ2	A0A099P2R2;A0A1Z8JM06;A0A1V2LLV5	Pichia kudriavzevii (Yeast) (Issatchenkia orientalis)	protein folding [GO:0006457]		ATP binding [GO:0005524]; unfolded protein binding [GO:0051082]	ATP binding [GO:0005524]; unfolded protein binding [GO:0051082]; protein folding [GO:0006457]	tr|A0A099P2R2|A0A099P2R2_PICKU Uncharacterized protein OS=Pichia kudriavzevii OX=4909 GN=JL09_g2357 PE=3 SV=1;tr|A0A1Z8JM06|A0A1Z8JM06_PICKU Hsp82-like protein OS=Pichia kudriavzevii OX=4909 GN=C5L36_0B06420 PE=3 SV=1;tr|A0A1V2LLV5|A0A1V2LLV5_PICKU ATP-dep	32	19	32	49.1	49.1	30.9	79.842	698	0	323.31	By MS/MS	By MS/MS	By matching	By matching	By matching	By matching	By matching	By MS/MS	By matching		By matching	By matching	By matching	By matching	By matching	By matching	By MS/MS	By MS/MS	By MS/MS	9208000000	20240000	25473000	11326000	7199000	6776400	4555300	2359400	6502200
A0A099P2U1	unreviewed	Elongation factor 3	BOH78_2649 C5L36_0B06230 CAS74_003719 JL09_g2341	A0A099P2U1	A0A099P2U1	Pichia kudriavzevii (Yeast) (Issatchenkia orientalis)			ATPase activity [GO:0016887]; ATP binding [GO:0005524]; translation elongation factor activity [GO:0003746]	ATP binding [GO:0005524]; ATPase activity [GO:0016887]; translation elongation factor activity [GO:0003746]	tr|A0A099P2U1|A0A099P2U1_PICKU Elongation factor 3 OS=Pichia kudriavzevii OX=4909 GN=BOH78_2649 PE=4 SV=1	40	26	40	54.9	54.9	38.2	115.58	1045	0	323.31	By matching	By MS/MS	By matching	By matching	By matching	By matching	By matching	By matching	By matching	By matching	By matching	By matching	By matching	By matching	By matching	By matching	By MS/MS	By matching	By MS/MS	18201000000	18523000	17152000	7218700	6390000	6576700	24561000	43904000	45175000
A0A099P2W3	unreviewed	Peptidyl-prolyl cis-trans isomerase (PPIase) (EC 5.2.1.8)	BOH78_3765 C5L36_0B07800 CAS74_004052 JL09_g2243	A0A099P2W3	A0A099P2W3	Pichia kudriavzevii (Yeast) (Issatchenkia orientalis)	ascospore formation [GO:0030437]; histone deacetylation [GO:0016575]; positive regulation of meiotic nuclear division [GO:0045836]; protein folding [GO:0006457]	mitochondrial intermembrane space [GO:0005758]; Set3 complex [GO:0034967]	cyclosporin A binding [GO:0016018]; peptidyl-prolyl cis-trans isomerase activity [GO:0003755]	mitochondrial intermembrane space [GO:0005758]; Set3 complex [GO:0034967]; cyclosporin A binding [GO:0016018]; peptidyl-prolyl cis-trans isomerase activity [GO:0003755]; ascospore formation [GO:0030437]; histone deacetylation [GO:0016575]; positive regulation of meiotic nuclear division [GO:0045836]; protein folding [GO:0006457]	tr|A0A099P2W3|A0A099P2W3_PICKU Peptidyl-prolyl cis-trans isomerase OS=Pichia kudriavzevii OX=4909 GN=BOH78_3765 PE=3 SV=1	8	7	7	67.1	67.1	67.1	17.551	161	0	323.31	By matching	By matching	By matching		By matching	By matching		By matching	By matching				By matching		By matching	By matching	By matching	By matching	By matching	28861000000	2599700	0	1934000	0	1929600	683130	0	2372100
A0A099P2X4	unreviewed	Pyrophosphate phospho-hydrolase (EC 3.6.1.1)	IPP1 BOH78_3721 C5L36_0B08260 CAS74_004008 JL09_g2289	A0A099P2X4	A0A099P2X4	Pichia kudriavzevii (Yeast) (Issatchenkia orientalis)	phosphate-containing compound metabolic process [GO:0006796]	cytoplasm [GO:0005737]	inorganic diphosphatase activity [GO:0004427]; magnesium ion binding [GO:0000287]	cytoplasm [GO:0005737]; inorganic diphosphatase activity [GO:0004427]; magnesium ion binding [GO:0000287]; phosphate-containing compound metabolic process [GO:0006796]	tr|A0A099P2X4|A0A099P2X4_PICKU Inorganic pyrophosphatase OS=Pichia kudriavzevii OX=4909 GN=BOH78_3721 PE=4 SV=1	13	10	13	57.2	57.2	45.3	31.823	285	0	134.28	By MS/MS	By MS/MS		By matching	By matching	By matching	By matching	By matching	By matching				By matching						By matching	7503100000	8150400	7165600	0	2436200	2235600	4051300	1867900	9992100
A0A099P2Y3	unreviewed	Cytochrome c domain-containing protein	JL09_g2279	A0A099P2Y3;A0A2U9R3A6;A0A1Z8JKA5;A0A1V2LLH4	A0A099P2Y3;A0A2U9R3A6;A0A1Z8JKA5;A0A1V2LLH4	Pichia kudriavzevii (Yeast) (Issatchenkia orientalis)	mitochondrial electron transport, ubiquinol to cytochrome c [GO:0006122]	integral component of membrane [GO:0016021]; mitochondrial respiratory chain complex III [GO:0005750]	electron transporter, transferring electrons within CoQH2-cytochrome c reductase complex activity [GO:0045153]; heme binding [GO:0020037]; metal ion binding [GO:0046872]	integral component of membrane [GO:0016021]; mitochondrial respiratory chain complex III [GO:0005750]; electron transporter, transferring electrons within CoQH2-cytochrome c reductase complex activity [GO:0045153]; heme binding [GO:0020037]; metal ion binding [GO:0046872]; mitochondrial electron transport, ubiquinol to cytochrome c [GO:0006122]	tr|A0A099P2Y3|A0A099P2Y3_PICKU Uncharacterized protein OS=Pichia kudriavzevii OX=4909 GN=JL09_g2279 PE=4 SV=1;tr|A0A2U9R3A6|A0A2U9R3A6_PICKU Uncharacterized protein OS=Pichia kudriavzevii OX=4909 GN=C5L36_0B08150 PE=4 SV=1;tr|A0A1Z8JKA5|A0A1Z8JKA5_PICKU Cy	5	3	4	35	28.5	19.5	27.314	246	0	224.24																	By MS/MS	By matching	By matching	251200000	0	0	0	0	0	0	0	0
A0A099P2Z5	unreviewed	ATP synthase subunit beta (EC 7.1.2.2)	JL09_g2239	A0A099P2Z5;A0A1V2LT19;A0A2U9R7T3;A0A1Z8JW72;Q0ZIE5;A0A2U9R716;A0A1Z8JVT6	A0A099P2Z5;A0A1V2LT19;A0A2U9R7T3;A0A1Z8JW72;Q0ZIE5	Pichia kudriavzevii (Yeast) (Issatchenkia orientalis)	arginine biosynthetic process [GO:0006526]; CAAX-box protein processing [GO:0071586]	integral component of membrane [GO:0016021]; mitochondrion [GO:0005739]; nucleus [GO:0005634]; proton-transporting ATP synthase complex, catalytic core F(1) [GO:0045261]	ATP binding [GO:0005524]; metal ion binding [GO:0046872]; metalloendopeptidase activity [GO:0004222]; proton-transporting ATPase activity, rotational mechanism [GO:0046961]; proton-transporting ATP synthase activity, rotational mechanism [GO:0046933]; transferase activity [GO:0016740]	integral component of membrane [GO:0016021]; mitochondrion [GO:0005739]; nucleus [GO:0005634]; proton-transporting ATP synthase complex, catalytic core F(1) [GO:0045261]; ATP binding [GO:0005524]; metal ion binding [GO:0046872]; metalloendopeptidase activity [GO:0004222]; proton-transporting ATP synthase activity, rotational mechanism [GO:0046933]; proton-transporting ATPase activity, rotational …	tr|A0A099P2Z5|A0A099P2Z5_PICKU ATP synthase subunit beta OS=Pichia kudriavzevii OX=4909 GN=JL09_g2239 PE=3 SV=1;tr|A0A1V2LT19|A0A1V2LT19_PICKU ATP synthase subunit beta OS=Pichia kudriavzevii OX=4909 GN=BOH78_1223 PE=3 SV=1;tr|A0A2U9R7T3|A0A2U9R7T3_PICKU A	24	7	24	15.4	15.4	5.1	275.63	2430	0	323.31	By MS/MS	By MS/MS	By MS/MS	By MS/MS	By MS/MS	By MS/MS	By MS/MS	By MS/MS	By MS/MS	By MS/MS	By matching	By MS/MS	By MS/MS	By MS/MS	By MS/MS	By MS/MS	By MS/MS	By MS/MS	By MS/MS	29498000000	323560000	357190000	173760000	101610000	104420000	156570000	98273000	104070000
A0A099P366	unreviewed	ATP synthase subunit alpha	CAS74_003754 JL09_g2373	A0A099P366;A0A1V2LMP9;A0A2U9R260	A0A099P366;A0A1V2LMP9;A0A2U9R260	Pichia kudriavzevii (Yeast) (Issatchenkia orientalis)		mitochondrial nucleoid [GO:0042645]; mitochondrial proton-transporting ATP synthase, catalytic core [GO:0005754]	ATPase activity [GO:0016887]; ATP binding [GO:0005524]; proton-transporting ATP synthase activity, rotational mechanism [GO:0046933]	mitochondrial nucleoid [GO:0042645]; mitochondrial proton-transporting ATP synthase, catalytic core [GO:0005754]; ATP binding [GO:0005524]; ATPase activity [GO:0016887]; proton-transporting ATP synthase activity, rotational mechanism [GO:0046933]	tr|A0A099P366|A0A099P366_PICKU ATP synthase subunit alpha OS=Pichia kudriavzevii OX=4909 GN=CAS74_003754 PE=3 SV=1;tr|A0A1V2LMP9|A0A1V2LMP9_PICKU ATP synthase subunit alpha OS=Pichia kudriavzevii OX=4909 GN=BOH78_2615 PE=3 SV=1;tr|A0A2U9R260|A0A2U9R260_PIC	21	10	21	50.6	50.6	26.5	57.88	539	0	323.31	By MS/MS	By MS/MS	By MS/MS	By MS/MS	By MS/MS	By MS/MS	By MS/MS	By MS/MS	By MS/MS	By MS/MS	By MS/MS	By MS/MS	By MS/MS	By MS/MS	By MS/MS	By MS/MS	By MS/MS	By MS/MS	By MS/MS	17455000000	230730000	232610000	157260000	110770000	110000000	80911000	31439000	34174000
A0A099P395	unreviewed	Aldehyde dehydrogenase 5, mitochondrial	BOH78_0056 C5L36_0E03210 CAS74_002923 JL09_g1308	A0A099P395	A0A099P395	Pichia kudriavzevii (Yeast) (Issatchenkia orientalis)	acetate biosynthetic process [GO:0019413]; ethanol metabolic process [GO:0006067]; NADPH regeneration [GO:0006740]; pyruvate metabolic process [GO:0006090]	mitochondrial nucleoid [GO:0042645]	aldehyde dehydrogenase (NAD+) activity [GO:0004029]	mitochondrial nucleoid [GO:0042645]; aldehyde dehydrogenase (NAD+) activity [GO:0004029]; acetate biosynthetic process [GO:0019413]; ethanol metabolic process [GO:0006067]; NADPH regeneration [GO:0006740]; pyruvate metabolic process [GO:0006090]	tr|A0A099P395|A0A099P395_PICKU Aldehyde dehydrogenase 5, mitochondrial OS=Pichia kudriavzevii OX=4909 GN=BOH78_0056 PE=3 SV=1	18	17	17	43.9	42.4	42.4	57.122	524	0	323.31	By matching	By matching	By matching	By matching	By matching	By matching	By matching	By matching	By matching	By matching	By matching			By matching		By matching	By MS/MS	By matching	By matching	3255100000	4361800	7552800	1463300	0	442540	605390	0	4031800
A0A099P399	unreviewed	40S ribosomal protein S4	BOH78_3709 CAS74_003997 JL09_g2301	A0A099P399;A0A2U9R2W1	A0A099P399;A0A2U9R2W1	Pichia kudriavzevii (Yeast) (Issatchenkia orientalis)	translation [GO:0006412]	ribosome [GO:0005840]	rRNA binding [GO:0019843]; structural constituent of ribosome [GO:0003735]	ribosome [GO:0005840]; rRNA binding [GO:0019843]; structural constituent of ribosome [GO:0003735]; translation [GO:0006412]	tr|A0A099P399|A0A099P399_PICKU 40S ribosomal protein S4 OS=Pichia kudriavzevii OX=4909 GN=BOH78_3709 PE=3 SV=1;tr|A0A2U9R2W1|A0A2U9R2W1_PICKU 40S ribosomal protein S4 OS=Pichia kudriavzevii OX=4909 GN=C5L36_0B08370 PE=3 SV=1	10	7	8	46.7	38.1	34.8	27.353	244	0	33.484				By matching				By matching	By matching			By matching	By matching			By matching	By matching	By matching	By matching	7078600000	0	0	0	1018600	0	0	0	646100
A0A099P3E7	unreviewed	Fumarate hydratase (EC 4.2.1.2)	BOH78_3288 C5L36_0B00710 JL09_g1983	A0A099P3E7;A0A1V2LGA7;A0A1Z8JH70;A0A1V2L497	A0A099P3E7;A0A1V2LGA7;A0A1Z8JH70	Pichia kudriavzevii (Yeast) (Issatchenkia orientalis)	double-strand break repair [GO:0006302]; fumarate metabolic process [GO:0006106]; tricarboxylic acid cycle [GO:0006099]	cytosol [GO:0005829]; mitochondrial matrix [GO:0005759]; nucleus [GO:0005634]; tricarboxylic acid cycle enzyme complex [GO:0045239]	fumarate hydratase activity [GO:0004333]	cytosol [GO:0005829]; mitochondrial matrix [GO:0005759]; nucleus [GO:0005634]; tricarboxylic acid cycle enzyme complex [GO:0045239]; fumarate hydratase activity [GO:0004333]; double-strand break repair [GO:0006302]; fumarate metabolic process [GO:0006106]; tricarboxylic acid cycle [GO:0006099]	tr|A0A099P3E7|A0A099P3E7_PICKU Fumarate hydratase, mitochondrial OS=Pichia kudriavzevii OX=4909 GN=BOH78_3288 PE=3 SV=1;tr|A0A1V2LGA7|A0A1V2LGA7_PICKU Fumarate hydratase, mitochondrial (Fragment) OS=Pichia kudriavzevii OX=4909 GN=BOH78_5224 PE=3 SV=1;tr|A0	10	5	10	34.4	34.4	16.5	52.785	485	0	293.46							By matching	By matching	By matching		By matching	By matching				By matching	By matching			2006600000	0	0	0	0	0	0	2041700	3116900
A0A099P3F0	unreviewed	Uncharacterized protein	JL09_g1446	A0A099P3F0;A0A1Z8JJZ6;A0A2U9R2Z4;A0A1V2LTQ6	A0A099P3F0;A0A1Z8JJZ6;A0A2U9R2Z4;A0A1V2LTQ6	Pichia kudriavzevii (Yeast) (Issatchenkia orientalis)					tr|A0A099P3F0|A0A099P3F0_PICKU Uncharacterized protein OS=Pichia kudriavzevii OX=4909 GN=JL09_g1446 PE=4 SV=1;tr|A0A1Z8JJZ6|A0A1Z8JJZ6_PICKU Uncharacterized protein OS=Pichia kudriavzevii OX=4909 GN=CAS74_003899 PE=4 SV=1;tr|A0A2U9R2Z4|A0A2U9R2Z4_PICKU Unc	14	14	14	22.4	22.4	22.4	118.33	1078	0	51.115	By MS/MS	By matching			By matching										By matching					415380000	2040100	1670600	0	0	950840	0	0	0
A0A099P3L2	unreviewed	Transaldolase (EC 2.2.1.2)	BOH78_3259 CAS74_005074 JL09_g2015	A0A099P3L2	A0A099P3L2	Pichia kudriavzevii (Yeast) (Issatchenkia orientalis)	carbohydrate metabolic process [GO:0005975]; pentose-phosphate shunt [GO:0006098]	cytoplasm [GO:0005737]	sedoheptulose-7-phosphate:D-glyceraldehyde-3-phosphate glyceronetransferase activity [GO:0004801]	cytoplasm [GO:0005737]; sedoheptulose-7-phosphate:D-glyceraldehyde-3-phosphate glyceronetransferase activity [GO:0004801]; carbohydrate metabolic process [GO:0005975]; pentose-phosphate shunt [GO:0006098]	tr|A0A099P3L2|A0A099P3L2_PICKU Transaldolase OS=Pichia kudriavzevii OX=4909 GN=BOH78_3259 PE=3 SV=1	15	1	12	58.2	49.2	4.3	35.613	323	0	146.8	By matching	By matching	By matching	By matching		By matching	By matching	By matching		By matching	By matching	By matching	By matching	By matching	By MS/MS	By matching	By matching	By matching	By matching	5655100000	0	0	0	0	0	0	1902500	962860
A0A099P3L9	unreviewed	Asparagine synthase (glutamine-hydrolyzing) (EC 6.3.5.4)	BOH78_1488 C5L36_0C06820 CAS74_000701 JL09_g1253	A0A099P3L9;A0A194S4I1;A0A2S5BC35;G0SXP6;EGU12509.1;A0A2T0A6F3;M7XXN8;A0A061B6U1	A0A099P3L9	Pichia kudriavzevii (Yeast) (Issatchenkia orientalis)	asparagine biosynthetic process [GO:0006529]; glutamine metabolic process [GO:0006541]		asparagine synthase (glutamine-hydrolyzing) activity [GO:0004066]; ATP binding [GO:0005524]	asparagine synthase (glutamine-hydrolyzing) activity [GO:0004066]; ATP binding [GO:0005524]; asparagine biosynthetic process [GO:0006529]; glutamine metabolic process [GO:0006541]	tr|A0A099P3L9|A0A099P3L9_PICKU Asparagine synthetase [glutamine-hydrolyzing] 1 OS=Pichia kudriavzevii OX=4909 GN=BOH78_1488 PE=4 SV=1	13	10	13	35.1	35.1	26.2	64.519	572	0	56.257								By matching									By MS/MS	By matching		1056700000	0	0	0	0	0	0	0	1798000
A0A099P3W3	unreviewed	5-aminoimidazole-4-carboxamide ribonucleotide formyltransferase (EC 2.1.2.3) (EC 3.5.4.10) (AICAR transformylase) (IMP synthase) (Inosinicase) (Phosphoribosylaminoimidazolecarboxamide formyltransferase)	BOH78_3782 C5L36_0E04560 CAS74_002784 JL09_g1955	A0A099P3W3	A0A099P3W3	Pichia kudriavzevii (Yeast) (Issatchenkia orientalis)	'de novo' IMP biosynthetic process [GO:0006189]		IMP cyclohydrolase activity [GO:0003937]; phosphoribosylaminoimidazolecarboxamide formyltransferase activity [GO:0004643]	IMP cyclohydrolase activity [GO:0003937]; phosphoribosylaminoimidazolecarboxamide formyltransferase activity [GO:0004643]; 'de novo' IMP biosynthetic process [GO:0006189]	tr|A0A099P3W3|A0A099P3W3_PICKU Bifunctional purine biosynthesis protein ADE17 OS=Pichia kudriavzevii OX=4909 GN=BOH78_3782 PE=3 SV=1	16	9	11	45.3	33	26.6	65.168	591	0	253	By MS/MS	By MS/MS	By MS/MS	By MS/MS	By MS/MS	By matching	By MS/MS	By MS/MS	By MS/MS	By MS/MS	By MS/MS	By MS/MS	By MS/MS	By matching			By MS/MS	By matching	By matching	2180600000	14973000	18247000	17537000	7410100	5513900	2855200	12293000	13619000
A0A099P3X8	unreviewed	4-aminobutyrate aminotransferase (EC 2.6.1.19) (GABA aminotransferase) (Gamma-amino-N-butyrate transaminase)	BOH78_1537 C5L36_0C06340 CAS74_000651 JL09_g1205	A0A099P3X8	A0A099P3X8	Pichia kudriavzevii (Yeast) (Issatchenkia orientalis)	gamma-aminobutyric acid metabolic process [GO:0009448]		4-aminobutyrate:2-oxoglutarate transaminase activity [GO:0034386]; pyridoxal phosphate binding [GO:0030170]	4-aminobutyrate:2-oxoglutarate transaminase activity [GO:0034386]; pyridoxal phosphate binding [GO:0030170]; gamma-aminobutyric acid metabolic process [GO:0009448]	tr|A0A099P3X8|A0A099P3X8_PICKU 4-aminobutyrate aminotransferase OS=Pichia kudriavzevii OX=4909 GN=BOH78_1537 PE=3 SV=1	5	5	5	20.8	20.8	20.8	52.123	471	0	87.999							By matching				By matching	By matching	By matching							93639000	0	0	0	0	0	0	1215800	0
A0A099P3Y7	unreviewed	Heat shock protein 70 1	C5L36_0B05960 CAS74_003693 JL09_g1001	A0A099P3Y7;A0A1V2LMU6	A0A099P3Y7;A0A1V2LMU6	Pichia kudriavzevii (Yeast) (Issatchenkia orientalis)			ATP binding [GO:0005524]	ATP binding [GO:0005524]	tr|A0A099P3Y7|A0A099P3Y7_PICKU Heat shock protein 70 1 OS=Pichia kudriavzevii OX=4909 GN=C5L36_0B05960 PE=3 SV=1;tr|A0A1V2LMU6|A0A1V2LMU6_PICKU Heat shock protein SSA3 OS=Pichia kudriavzevii OX=4909 GN=BOH78_2676 PE=3 SV=1	23	10	11	50.7	24.7	21.1	69.912	645	0	323.31	By matching	By matching	By matching	By matching	By matching	By matching	By matching	By matching		By matching	By matching	By matching	By matching	By matching	By matching	By matching	By matching	By matching	By matching	8805600000	0	0	0	1147300	762760	557440	0	0
A0A099P401	unreviewed	Protein transport protein SEC13	BOH78_0686 C5L36_0B11890 CAS74_004572 JL09_g1801	A0A099P401	A0A099P401	Pichia kudriavzevii (Yeast) (Issatchenkia orientalis)	COPII-coated vesicle budding [GO:0090114]; mRNA transport [GO:0051028]; nuclear pore distribution [GO:0031081]; positive regulation of GTPase activity [GO:0043547]; positive regulation of TORC1 signaling [GO:1904263]; positive regulation of transcription, DNA-templated [GO:0045893]; protein transport [GO:0015031]; ubiquitin-dependent ERAD pathway [GO:0030433]	COPII vesicle coat [GO:0030127]; endoplasmic reticulum membrane [GO:0005789]; Golgi membrane [GO:0000139]; nuclear pore outer ring [GO:0031080]; Seh1-associated complex [GO:0035859]	structural molecule activity [GO:0005198]	COPII vesicle coat [GO:0030127]; endoplasmic reticulum membrane [GO:0005789]; Golgi membrane [GO:0000139]; nuclear pore outer ring [GO:0031080]; Seh1-associated complex [GO:0035859]; structural molecule activity [GO:0005198]; COPII-coated vesicle budding [GO:0090114]; mRNA transport [GO:0051028]; nuclear pore distribution [GO:0031081]; positive regulation of GTPase activity [GO:0043547]; positive…	tr|A0A099P401|A0A099P401_PICKU Protein transport protein SEC13 OS=Pichia kudriavzevii OX=4909 GN=BOH78_0686 PE=3 SV=1	3	3	3	13.3	13.3	13.3	32.301	293	0.0022783	2.3731	By matching		By matching	By matching		By MS/MS				By matching	By matching	By matching	By matching		By matching	By matching		By MS/MS	By MS/MS	131930000	2710300	0	3525100	2550400	0	1456600	0	0
A0A099P453	unreviewed	Thiol-specific monooxygenase	BOH78_3234 C5L36_0B01280 CAS74_005101 JL09_g2039	A0A099P453	A0A099P453	Pichia kudriavzevii (Yeast) (Issatchenkia orientalis)			flavin adenine dinucleotide binding [GO:0050660]; N,N-dimethylaniline monooxygenase activity [GO:0004499]; NADP binding [GO:0050661]	flavin adenine dinucleotide binding [GO:0050660]; N,N-dimethylaniline monooxygenase activity [GO:0004499]; NADP binding [GO:0050661]	tr|A0A099P453|A0A099P453_PICKU Thiol-specific monooxygenase OS=Pichia kudriavzevii OX=4909 GN=BOH78_3234 PE=3 SV=1	6	6	6	19.1	19.1	19.1	52.496	465	0.0002869	9.5246							By matching		By matching	By matching	By matching	By matching		By matching						121420000	0	0	0	0	0	0	669240	0
A0A099P458	unreviewed	Uncharacterized protein	JL09_g1779	A0A099P458;A0A1Z8JLG3;A0A1V2LLA1;C4YFW1;Q5AB84	A0A099P458;A0A1Z8JLG3;A0A1V2LLA1	Pichia kudriavzevii (Yeast) (Issatchenkia orientalis)		nuclear envelope [GO:0005635]	nuclear localization sequence binding [GO:0008139]; RNA binding [GO:0003723]; single-stranded telomeric DNA binding [GO:0043047]	nuclear envelope [GO:0005635]; nuclear localization sequence binding [GO:0008139]; RNA binding [GO:0003723]; single-stranded telomeric DNA binding [GO:0043047]	tr|A0A099P458|A0A099P458_PICKU Uncharacterized protein OS=Pichia kudriavzevii OX=4909 GN=JL09_g1779 PE=4 SV=1;tr|A0A1Z8JLG3|A0A1Z8JLG3_PICKU Uncharacterized protein OS=Pichia kudriavzevii OX=4909 GN=CAS74_003544 PE=4 SV=1;tr|A0A1V2LLA1|A0A1V2LLA1_PICKU Nuc	9	9	9	31.1	31.1	31.1	41.623	383	0	29.46	By matching					By matching		By matching			By matching	By matching					By matching			1290300000	936960	0	0	0	0	566550	0	1302500
A0A099P4B5	unreviewed	Diadenosine tetraphosphate synthetase (EC 6.1.1.14)	BOH78_3035 JL09_g1756	A0A099P4B5;A0A2U9R1H6;A0A1Z8JLF2	A0A099P4B5;A0A2U9R1H6;A0A1Z8JLF2	Pichia kudriavzevii (Yeast) (Issatchenkia orientalis)	glycyl-tRNA aminoacylation [GO:0006426]	cytoplasm [GO:0005737]	ATP binding [GO:0005524]; glycine-tRNA ligase activity [GO:0004820]	cytoplasm [GO:0005737]; ATP binding [GO:0005524]; glycine-tRNA ligase activity [GO:0004820]; glycyl-tRNA aminoacylation [GO:0006426]	tr|A0A099P4B5|A0A099P4B5_PICKU Glycine--tRNA ligase 1, mitochondrial OS=Pichia kudriavzevii OX=4909 GN=BOH78_3035 PE=4 SV=1;tr|A0A2U9R1H6|A0A2U9R1H6_PICKU Uncharacterized protein OS=Pichia kudriavzevii OX=4909 GN=C5L36_0B04310 PE=4 SV=1;tr|A0A1Z8JLF2|A0A1Z	12	10	12	25.3	25.3	20.7	74.189	657	0	268.78																	By MS/MS	By matching	By matching	1959900000	0	0	0	0	0	0	0	0
A0A099P4B9	unreviewed	Heat shock protein SSB1	C5L36_0B04100 CAS74_003507 JL09_g1735	A0A099P4B9;A0A1V2LLC3	A0A099P4B9;A0A1V2LLC3	Pichia kudriavzevii (Yeast) (Issatchenkia orientalis)		cytosol [GO:0005829]	ATP binding [GO:0005524]	cytosol [GO:0005829]; ATP binding [GO:0005524]	tr|A0A099P4B9|A0A099P4B9_PICKU Heat shock protein SSB1 OS=Pichia kudriavzevii OX=4909 GN=C5L36_0B04100 PE=3 SV=1;tr|A0A1V2LLC3|A0A1V2LLC3_PICKU Heat shock protein SSB OS=Pichia kudriavzevii OX=4909 GN=BOH78_3014 PE=3 SV=1	27	22	27	60.7	60.7	47.6	66.214	615	0	323.31	By MS/MS	By MS/MS	By matching			By matching	By matching	By matching	By matching		By matching	By matching	By matching	By matching	By matching		By MS/MS	By MS/MS	By MS/MS	23104000000	30054000	38710000	11722000	0	0	2427700	449540	4037000
A0A099P4D2	unreviewed	40S ribosomal protein	BOH78_2215 C5L36_0B03860 CAS74_003487 JL09_g1716	A0A099P4D2	A0A099P4D2	Pichia kudriavzevii (Yeast) (Issatchenkia orientalis)	translation [GO:0006412]	small ribosomal subunit [GO:0015935]	RNA binding [GO:0003723]; structural constituent of ribosome [GO:0003735]	small ribosomal subunit [GO:0015935]; RNA binding [GO:0003723]; structural constituent of ribosome [GO:0003735]; translation [GO:0006412]	tr|A0A099P4D2|A0A099P4D2_PICKU 40S ribosomal protein OS=Pichia kudriavzevii OX=4909 GN=BOH78_2215 PE=3 SV=1	8	4	8	48.7	48.7	29.6	25.284	226	0	205.96			By matching	By matching	By matching								By matching	By matching	By matching		By MS/MS	By MS/MS	By matching	3561100000	0	0	1036300	303080	1084500	0	0	0
A0A099P4D3	unreviewed	Ras-related protein YPTC6	BOH78_0762 C5L36_0A03040 CAS74_001509 JL09_g1670	A0A099P4D3	A0A099P4D3	Pichia kudriavzevii (Yeast) (Issatchenkia orientalis)	mitotic cytokinesis [GO:0000281]; positive regulation of ascospore-type prospore membrane formation [GO:1903024]; positive regulation of exocytosis [GO:0045921]; protein localization to cell cortex of cell tip [GO:1990896]; protein localization to meiotic spindle pole body [GO:1902441]; vacuole fusion, non-autophagic [GO:0042144]	cleavage furrow leading edge [GO:0090689]; cortical dynamic polarity patch [GO:0090726]; growing cell tip [GO:0035838]; meiotic spindle pole [GO:0090619]; meiotic spindle pole body [GO:0035974]; prospore membrane [GO:0005628]	GTPase activity [GO:0003924]; GTP binding [GO:0005525]	cleavage furrow leading edge [GO:0090689]; cortical dynamic polarity patch [GO:0090726]; growing cell tip [GO:0035838]; meiotic spindle pole [GO:0090619]; meiotic spindle pole body [GO:0035974]; prospore membrane [GO:0005628]; GTP binding [GO:0005525]; GTPase activity [GO:0003924]; mitotic cytokinesis [GO:0000281]; positive regulation of ascospore-type prospore membrane formation [GO:1903024]; po…	tr|A0A099P4D3|A0A099P4D3_PICKU Ras-related protein YPTC6 OS=Pichia kudriavzevii OX=4909 GN=BOH78_0762 PE=4 SV=1	4	3	4	29	29	24	24.538	221	0	41.443														By matching	By MS/MS	By matching	By matching	By MS/MS	By MS/MS	260730000	0	0	0	0	0	0	0	0
A0A099P4K2	unreviewed	40S ribosomal protein S25	BOH78_5186 C5L36_0A02420 CAS74_001442 JL09_g1611	A0A099P4K2	A0A099P4K2	Pichia kudriavzevii (Yeast) (Issatchenkia orientalis)		ribosome [GO:0005840]		ribosome [GO:0005840]	tr|A0A099P4K2|A0A099P4K2_PICKU 40S ribosomal protein S25 OS=Pichia kudriavzevii OX=4909 GN=BOH78_5186 PE=4 SV=1	3	2	3	28.3	28.3	17.9	11.734	106	0.00027902	8.7202	By matching	By MS/MS		By matching	By matching	By matching	By matching	By matching	By matching			By matching	By matching							2182200000	9127400	9678000	0	957890	1956700	26419000	22147000	22734000
A0A099P4P6	unreviewed	VWFA domain-containing protein	JL09_g1848	A0A099P4P6;A0A2U9R3U5;A0A1V2LJ36	A0A099P4P6;A0A2U9R3U5;A0A1V2LJ36	Pichia kudriavzevii (Yeast) (Issatchenkia orientalis)	proteasome assembly [GO:0043248]; ubiquitin-dependent protein catabolic process [GO:0006511]	proteasome regulatory particle, base subcomplex [GO:0008540]; proteasome regulatory particle, lid subcomplex [GO:0008541]	K48-linked polyubiquitin modification-dependent protein binding [GO:0036435]	proteasome regulatory particle, base subcomplex [GO:0008540]; proteasome regulatory particle, lid subcomplex [GO:0008541]; K48-linked polyubiquitin modification-dependent protein binding [GO:0036435]; proteasome assembly [GO:0043248]; ubiquitin-dependent protein catabolic process [GO:0006511]	tr|A0A099P4P6|A0A099P4P6_PICKU Uncharacterized protein OS=Pichia kudriavzevii OX=4909 GN=JL09_g1848 PE=4 SV=1;tr|A0A2U9R3U5|A0A2U9R3U5_PICKU Uncharacterized protein OS=Pichia kudriavzevii OX=4909 GN=C5L36_0B12360 PE=4 SV=1;tr|A0A1V2LJ36|A0A1V2LJ36_PICKU Un	5	5	5	29.3	29.3	29.3	30.946	280	0	54.51											By matching		By matching							188600000	0	0	0	0	0	0	0	0
A0A099P4R3	unreviewed	D-arabinose dehydrogenase [NAD(P)+] heavy chain	BOH78_0224 C5L36_0E01550 CAS74_003102 JL09_g835	A0A099P4R3	A0A099P4R3	Pichia kudriavzevii (Yeast) (Issatchenkia orientalis)	cellular carbohydrate metabolic process [GO:0044262]	cytosol [GO:0005829]	D-arabinose 1-dehydrogenase [NAD(P)+] activity [GO:0045290]	cytosol [GO:0005829]; D-arabinose 1-dehydrogenase [NAD(P)+] activity [GO:0045290]; cellular carbohydrate metabolic process [GO:0044262]	tr|A0A099P4R3|A0A099P4R3_PICKU D-arabinose dehydrogenase [NAD(P)+] heavy chain OS=Pichia kudriavzevii OX=4909 GN=BOH78_0224 PE=4 SV=1	14	14	14	67.1	67.1	67.1	35.58	313	0	290.44					By matching	By matching														2527900000	0	0	0	0	600090	821540	0	0
A0A099P4T4	unreviewed	Mitochondrial peroxiredoxin PRX1	BOH78_0316 C5L36_0E00560 CAS74_003199 JL09_g741	A0A099P4T4	A0A099P4T4	Pichia kudriavzevii (Yeast) (Issatchenkia orientalis)	cell redox homeostasis [GO:0045454]; cellular response to oxidative stress [GO:0034599]; regulation of hydrogen peroxide-induced cell death [GO:1903205]; response to cadmium ion [GO:0046686]	mitochondrion [GO:0005739]	thioredoxin peroxidase activity [GO:0008379]	mitochondrion [GO:0005739]; thioredoxin peroxidase activity [GO:0008379]; cell redox homeostasis [GO:0045454]; cellular response to oxidative stress [GO:0034599]; regulation of hydrogen peroxide-induced cell death [GO:1903205]; response to cadmium ion [GO:0046686]	tr|A0A099P4T4|A0A099P4T4_PICKU Mitochondrial peroxiredoxin PRX1 OS=Pichia kudriavzevii OX=4909 GN=BOH78_0316 PE=4 SV=1	7	7	7	37	37	37	27.037	243	0	42.457							By matching				By matching	By matching								1319100000	0	0	0	0	0	0	346880	0
A0A099P592	unreviewed	Phosphotransferase (EC 2.7.1.-)	JL09_g1398	A0A099P592;A0A1V2LTH8;A0A1Z8JK42	A0A099P592;A0A1V2LTH8;A0A1Z8JK42	Pichia kudriavzevii (Yeast) (Issatchenkia orientalis)	cellular glucose homeostasis [GO:0001678]; glycolytic process [GO:0006096]		ATP binding [GO:0005524]; glucose binding [GO:0005536]; hexokinase activity [GO:0004396]	ATP binding [GO:0005524]; glucose binding [GO:0005536]; hexokinase activity [GO:0004396]; cellular glucose homeostasis [GO:0001678]; glycolytic process [GO:0006096]	tr|A0A099P592|A0A099P592_PICKU Phosphotransferase OS=Pichia kudriavzevii OX=4909 GN=JL09_g1398 PE=3 SV=1;tr|A0A1V2LTH8|A0A1V2LTH8_PICKU Phosphotransferase OS=Pichia kudriavzevii OX=4909 GN=BOH78_0387 PE=3 SV=1;tr|A0A1Z8JK42|A0A1Z8JK42_PICKU Phosphotransfer	21	1	21	69.2	69.2	8.8	49.053	441	0	323.31	By matching	By matching	By matching	By matching	By matching	By matching	By matching	By matching	By matching	By matching	By matching	By matching	By matching				By matching			9422600000	9516200	10607000	7168900	2355400	5411600	1667400	20063000	20534000
A0A099P5J4	unreviewed	Adenosylhomocysteinase (EC 3.3.1.1)	BOH78_1159 C5L36_0C10140 CAS74_001037 JL09_g671	A0A099P5J4	A0A099P5J4	Pichia kudriavzevii (Yeast) (Issatchenkia orientalis)	one-carbon metabolic process [GO:0006730]; phosphatidylcholine biosynthetic process [GO:0006656]; S-adenosylhomocysteine catabolic process [GO:0019510]; triglyceride metabolic process [GO:0006641]		adenosylhomocysteinase activity [GO:0004013]	adenosylhomocysteinase activity [GO:0004013]; one-carbon metabolic process [GO:0006730]; phosphatidylcholine biosynthetic process [GO:0006656]; S-adenosylhomocysteine catabolic process [GO:0019510]; triglyceride metabolic process [GO:0006641]	tr|A0A099P5J4|A0A099P5J4_PICKU Adenosylhomocysteinase OS=Pichia kudriavzevii OX=4909 GN=BOH78_1159 PE=3 SV=1	17	10	17	51.9	51.9	34.7	49.11	449	0	286.83	By matching	By matching	By matching		By matching	By matching	By matching		By matching	By matching		By matching			By matching		By matching	By matching		8741100000	5010700	3403600	1953500	0	2722000	3076500	4322800	0
A0A099P5K0	unreviewed	Alpha-NAC (Nascent polypeptide-associated complex subunit alpha)	BOH78_1116 CAS74_000985 JL09_g626	A0A099P5K0;A0A2U9R7G3	A0A099P5K0;A0A2U9R7G3	Pichia kudriavzevii (Yeast) (Issatchenkia orientalis)	posttranslational protein targeting to endoplasmic reticulum membrane [GO:0006620]	nascent polypeptide-associated complex [GO:0005854]; nucleus [GO:0005634]	phosphatidic acid binding [GO:0070300]; phosphatidylinositol-3,5-bisphosphate binding [GO:0080025]; phosphatidylinositol-3-phosphate binding [GO:0032266]; phosphatidylinositol-4-phosphate binding [GO:0070273]; unfolded protein binding [GO:0051082]	nascent polypeptide-associated complex [GO:0005854]; nucleus [GO:0005634]; phosphatidic acid binding [GO:0070300]; phosphatidylinositol-3,5-bisphosphate binding [GO:0080025]; phosphatidylinositol-3-phosphate binding [GO:0032266]; phosphatidylinositol-4-phosphate binding [GO:0070273]; unfolded protein binding [GO:0051082]; posttranslational protein targeting to endoplasmic reticulum membrane [GO:0…	tr|A0A099P5K0|A0A099P5K0_PICKU Nascent polypeptide-associated complex subunit alpha OS=Pichia kudriavzevii OX=4909 GN=BOH78_1116 PE=4 SV=1;tr|A0A2U9R7G3|A0A2U9R7G3_PICKU Uncharacterized protein OS=Pichia kudriavzevii OX=4909 GN=C5L36_0C09630 PE=4 SV=1	9	9	9	68	68	68	19.077	175	0	76.186			By matching	By matching	By matching	By matching		By matching		By matching	By matching	By matching	By matching				By matching	By matching	By matching	2463400000	0	0	1104900	715370	1164200	1614300	0	697990
A0A099P5M1	unreviewed	(2E,6E)-farnesyl diphosphate synthase (EC 2.5.1.1) (EC 2.5.1.10) (Dimethylallyltranstransferase) (Farnesyl diphosphate synthase)	BOH78_0018 C5L36_0E03560 JL09_g1346	A0A099P5M1;A0A1Z8JN85;A0A1V2L3T0	A0A099P5M1;A0A1Z8JN85	Pichia kudriavzevii (Yeast) (Issatchenkia orientalis)	ergosterol biosynthetic process [GO:0006696]; farnesyl diphosphate biosynthetic process [GO:0045337]	endoplasmic reticulum [GO:0005783]; integral component of membrane [GO:0016021]	dimethylallyltranstransferase activity [GO:0004161]; farnesyltranstransferase activity [GO:0004311]; geranyltranstransferase activity [GO:0004337]	endoplasmic reticulum [GO:0005783]; integral component of membrane [GO:0016021]; dimethylallyltranstransferase activity [GO:0004161]; farnesyltranstransferase activity [GO:0004311]; geranyltranstransferase activity [GO:0004337]; ergosterol biosynthetic process [GO:0006696]; farnesyl diphosphate biosynthetic process [GO:0045337]	tr|A0A099P5M1|A0A099P5M1_PICKU Farnesyl pyrophosphate synthase OS=Pichia kudriavzevii OX=4909 GN=BOH78_0018 PE=3 SV=1;tr|A0A1Z8JN85|A0A1Z8JN85_PICKU Farnesyl pyrophosphate synthase OS=Pichia kudriavzevii OX=4909 GN=CAS74_002886 PE=3 SV=1	7	6	7	23.4	23.4	20.8	40.926	351	0	89.549	By matching	By matching	By matching			By matching	By matching								By matching			By MS/MS	By matching	1371600000	1872500	820090	2142400	0	0	1585500	325470	0
A0A099P5P4	unreviewed	Seryl-tRNA synthetase (EC 6.1.1.11) (Seryl-tRNA(Ser/Sec) synthetase)	BOH78_0077 C5L36_0E03030 CAS74_002944 JL09_g1287	A0A099P5P4	A0A099P5P4	Pichia kudriavzevii (Yeast) (Issatchenkia orientalis)	selenocysteinyl-tRNA(Sec) biosynthetic process [GO:0097056]; seryl-tRNA aminoacylation [GO:0006434]		ATP binding [GO:0005524]; serine-tRNA ligase activity [GO:0004828]	ATP binding [GO:0005524]; serine-tRNA ligase activity [GO:0004828]; selenocysteinyl-tRNA(Sec) biosynthetic process [GO:0097056]; seryl-tRNA aminoacylation [GO:0006434]	tr|A0A099P5P4|A0A099P5P4_PICKU Serine--tRNA ligase, cytoplasmic OS=Pichia kudriavzevii OX=4909 GN=BOH78_0077 PE=4 SV=1	10	6	6	30.4	21.5	21.5	52.615	460	0	193.1	By matching	By matching		By matching		By matching	By matching	By matching	By matching	By matching	By matching			By matching	By matching		By matching	By matching	By matching	579270000	5136200	5170900	0	4408300	0	2750300	0	0
A0A099P5S1	unreviewed	HDAC_interact domain-containing protein	JL09_g1149	A0A099P5S1;A0A1Z8JUH9;A0A2U9R5Q0;A0A1V2LME5	A0A099P5S1;A0A1Z8JUH9;A0A2U9R5Q0;A0A1V2LME5	Pichia kudriavzevii (Yeast) (Issatchenkia orientalis)	regulation of transcription, DNA-templated [GO:0006355]	nucleus [GO:0005634]	transcription corepressor activity [GO:0003714]	nucleus [GO:0005634]; transcription corepressor activity [GO:0003714]; regulation of transcription, DNA-templated [GO:0006355]	tr|A0A099P5S1|A0A099P5S1_PICKU Uncharacterized protein OS=Pichia kudriavzevii OX=4909 GN=JL09_g1149 PE=4 SV=1;tr|A0A1Z8JUH9|A0A1Z8JUH9_PICKU Uncharacterized protein OS=Pichia kudriavzevii OX=4909 GN=CAS74_000597 PE=4 SV=1;tr|A0A2U9R5Q0|A0A2U9R5Q0_PICKU Unc	3	3	3	3	3	3	172.96	1515	0.00059642	3.417	By MS/MS	By matching	By matching	By matching	By matching	By matching										By matching				80054000	2933100	960560	3257500	1323000	2121300	2773700	0	0
A0A099P5T7	unreviewed	Isocitrate dehydrogenase [NADP] (EC 1.1.1.42)	BOH78_1605 C5L36_0C02220 CAS74_000226 JL09_g495	A0A099P5T7;C4YIQ7;B9WBP0;A0A1D8PHH7;A0A1C7FUY8	A0A099P5T7	Pichia kudriavzevii (Yeast) (Issatchenkia orientalis)	isocitrate metabolic process [GO:0006102]; tricarboxylic acid cycle [GO:0006099]		isocitrate dehydrogenase (NADP+) activity [GO:0004450]; magnesium ion binding [GO:0000287]; NAD binding [GO:0051287]	isocitrate dehydrogenase (NADP+) activity [GO:0004450]; magnesium ion binding [GO:0000287]; NAD binding [GO:0051287]; isocitrate metabolic process [GO:0006102]; tricarboxylic acid cycle [GO:0006099]	tr|A0A099P5T7|A0A099P5T7_PICKU Isocitrate dehydrogenase [NADP] OS=Pichia kudriavzevii OX=4909 GN=BOH78_1605 PE=3 SV=1	15	11	15	41.8	41.8	32.1	46.22	411	0	323.31	By MS/MS	By matching	By matching	By MS/MS	By matching	By matching	By matching	By MS/MS	By matching	By matching	By matching	By matching	By MS/MS		By matching	By matching	By MS/MS	By MS/MS	By MS/MS	2214700000	4445700	7288500	2990000	6638000	13996000	11739000	10807000	12462000
A0A099P5U6	unreviewed	Spermidine synthase	BOH78_1556 C5L36_0C06150 CAS74_000632 JL09_g1185	A0A099P5U6	A0A099P5U6	Pichia kudriavzevii (Yeast) (Issatchenkia orientalis)	pantothenate biosynthetic process [GO:0015940]; spermidine biosynthetic process [GO:0008295]		spermidine synthase activity [GO:0004766]	spermidine synthase activity [GO:0004766]; pantothenate biosynthetic process [GO:0015940]; spermidine biosynthetic process [GO:0008295]	tr|A0A099P5U6|A0A099P5U6_PICKU Spermidine synthase OS=Pichia kudriavzevii OX=4909 GN=BOH78_1556 PE=3 SV=1	4	3	3	25.9	21.5	21.5	33.009	293	0	41.486	By matching		By matching			By matching	By matching	By matching	By matching	By matching	By matching					By matching		By matching		165230000	489510	0	948610	0	0	1075300	581350	0
A0A099P5X5	unreviewed	Uncharacterized protein	JL09_g1169	A0A099P5X5;A0A099NTJ6	A0A099P5X5;A0A099NTJ6	Pichia kudriavzevii (Yeast) (Issatchenkia orientalis)		mitochondrial matrix [GO:0005759]		mitochondrial matrix [GO:0005759]	tr|A0A099P5X5|A0A099P5X5_PICKU Uncharacterized protein OS=Pichia kudriavzevii OX=4909 GN=JL09_g1169 PE=4 SV=1;tr|A0A099NTJ6|A0A099NTJ6_PICKU Mitochondrial acidic protein MAM33 OS=Pichia kudriavzevii OX=4909 GN=BOH78_4971 PE=4 SV=1	9	9	9	50.8	50.8	50.8	28.81	254	0	241.98	By matching		By matching	By matching					By matching		By matching	By matching	By matching		By matching	By matching	By matching		By matching	1265000000	740660	0	1411500	276820	0	0	0	0
A0A099P5Y7	unreviewed	Uncharacterized protein	C5L36_0C04050 JL09_g304	A0A099P5Y7;A0A1V2LQR1;A0A1Z8JTV9	A0A099P5Y7;A0A1V2LQR1;A0A1Z8JTV9	Pichia kudriavzevii (Yeast) (Issatchenkia orientalis)					tr|A0A099P5Y7|A0A099P5Y7_PICKU Uncharacterized protein OS=Pichia kudriavzevii OX=4909 GN=C5L36_0C04050 PE=4 SV=1;tr|A0A1V2LQR1|A0A1V2LQR1_PICKU Cell surface mannoprotein MP65 OS=Pichia kudriavzevii OX=4909 GN=BOH78_1795 PE=4 SV=1;tr|A0A1Z8JTV9|A0A1Z8JTV9_P	5	5	5	20.8	20.8	20.8	41.657	394	0	132.33																		By matching	By matching	648740000	0	0	0	0	0	0	0	0
A0A099P621	unreviewed	Obg-like ATPase 1	OLA1 BOH78_1585 C5L36_0C02000 CAS74_000205 JL09_g515	A0A099P621;A0A061AJA4	A0A099P621	Pichia kudriavzevii (Yeast) (Issatchenkia orientalis)		cytoplasm [GO:0005737]	ATPase activity [GO:0016887]; ATP binding [GO:0005524]; GTP binding [GO:0005525]; ribosomal large subunit binding [GO:0043023]; ribosome binding [GO:0043022]	cytoplasm [GO:0005737]; ATP binding [GO:0005524]; ATPase activity [GO:0016887]; GTP binding [GO:0005525]; ribosomal large subunit binding [GO:0043023]; ribosome binding [GO:0043022]	tr|A0A099P621|A0A099P621_PICKU Obg-like ATPase 1 OS=Pichia kudriavzevii OX=4909 GN=OLA1 PE=3 SV=1	16	15	16	49.1	49.1	46.8	44.196	395	0	219.73	By matching	By matching	By matching		By matching	By matching	By matching	By matching	By matching	By matching	By matching	By matching	By matching			By matching		By matching	By matching	1848200000	2860800	638240	983440	0	1785700	1025400	879400	888880
A0A099P629	unreviewed	Phospho-2-dehydro-3-deoxyheptonate aldolase (EC 2.5.1.54)	BOH78_1587 C5L36_0C02040 CAS74_000209 JL09_g512	A0A099P629;A0A1V2L2I7;G8BE56;B9WAP2;A0A1D8PGI8	A0A099P629	Pichia kudriavzevii (Yeast) (Issatchenkia orientalis)	aromatic amino acid family biosynthetic process [GO:0009073]		3-deoxy-7-phosphoheptulonate synthase activity [GO:0003849]	3-deoxy-7-phosphoheptulonate synthase activity [GO:0003849]; aromatic amino acid family biosynthetic process [GO:0009073]	tr|A0A099P629|A0A099P629_PICKU Phospho-2-dehydro-3-deoxyheptonate aldolase OS=Pichia kudriavzevii OX=4909 GN=BOH78_1587 PE=3 SV=1	9	8	9	39.9	39.9	36.4	39.337	363	0	60.233	By matching	By matching	By matching						By matching					By matching	By matching				By matching	502300000	3731400	3638100	2750300	0	0	0	0	0
A0A099P6E0	unreviewed	Histone-glutamine methyltransferase (rRNA 2'-O-methyltransferase fibrillarin)	C5L36_0B05630 CAS74_003659 JL09_g1034	A0A099P6E0;A0A1V2LN08	A0A099P6E0;A0A1V2LN08	Pichia kudriavzevii (Yeast) (Issatchenkia orientalis)	box C/D snoRNA 3'-end processing [GO:0000494]; histone glutamine methylation [GO:1990258]; regulation of transcription by RNA polymerase I [GO:0006356]	box C/D snoRNP complex [GO:0031428]; small-subunit processome [GO:0032040]	histone-glutamine methyltransferase activity [GO:1990259]; RNA binding [GO:0003723]; rRNA methyltransferase activity [GO:0008649]	box C/D snoRNP complex [GO:0031428]; small-subunit processome [GO:0032040]; histone-glutamine methyltransferase activity [GO:1990259]; RNA binding [GO:0003723]; rRNA methyltransferase activity [GO:0008649]; box C/D snoRNA 3'-end processing [GO:0000494]; histone glutamine methylation [GO:1990258]; regulation of transcription by RNA polymerase I [GO:0006356]	tr|A0A099P6E0|A0A099P6E0_PICKU rRNA 2-O-methyltransferase fibrillarin OS=Pichia kudriavzevii OX=4909 GN=C5L36_0B05630 PE=3 SV=1;tr|A0A1V2LN08|A0A1V2LN08_PICKU rRNA 2-O-methyltransferase fibrillarin OS=Pichia kudriavzevii OX=4909 GN=BOH78_2708 PE=4 SV=1	8	3	8	34.4	34.4	11.1	33.164	314	0	42.16							By matching										By MS/MS	By MS/MS	By MS/MS	599970000	0	0	0	0	0	0	615620	0
A0A099P6F5	unreviewed	Serine hydroxymethyltransferase (EC 2.1.2.1)	JL09_g1233	A0A099P6F5;A0A2U9R5S8;A0A1V2LQV6;A0A061B3Z4	A0A099P6F5;A0A2U9R5S8;A0A1V2LQV6	Pichia kudriavzevii (Yeast) (Issatchenkia orientalis)	glycine biosynthetic process from serine [GO:0019264]; tetrahydrofolate interconversion [GO:0035999]		glycine hydroxymethyltransferase activity [GO:0004372]; pyridoxal phosphate binding [GO:0030170]	glycine hydroxymethyltransferase activity [GO:0004372]; pyridoxal phosphate binding [GO:0030170]; glycine biosynthetic process from serine [GO:0019264]; tetrahydrofolate interconversion [GO:0035999]	tr|A0A099P6F5|A0A099P6F5_PICKU Serine hydroxymethyltransferase OS=Pichia kudriavzevii OX=4909 GN=JL09_g1233 PE=3 SV=1;tr|A0A2U9R5S8|A0A2U9R5S8_PICKU Serine hydroxymethyltransferase OS=Pichia kudriavzevii OX=4909 GN=C5L36_0C06620 PE=3 SV=1;tr|A0A1V2LQV6|A0A	11	5	9	32	27.3	12.9	45.271	410	0	80.977	By MS/MS	By matching	By matching	By matching	By matching	By matching		By matching			By matching	By matching		By matching	By matching	By matching	By matching	By matching	By matching	1982400000	5665500	4660100	5201200	2860700	2362100	1354400	0	2154500
A0A099P6G1	unreviewed	T-complex protein 1 subunit delta	JL09_g1014	A0A099P6G1;A0A1V2LMG1;A0A099NV75;C4YHH4;B9WFX5;A0A1D8PLN3	A0A099P6G1;A0A1V2LMG1	Pichia kudriavzevii (Yeast) (Issatchenkia orientalis)	protein folding [GO:0006457]	chaperonin-containing T-complex [GO:0005832]	ATP binding [GO:0005524]; unfolded protein binding [GO:0051082]	chaperonin-containing T-complex [GO:0005832]; ATP binding [GO:0005524]; unfolded protein binding [GO:0051082]; protein folding [GO:0006457]	tr|A0A099P6G1|A0A099P6G1_PICKU T-complex protein 1 subunit delta OS=Pichia kudriavzevii OX=4909 GN=JL09_g1014 PE=3 SV=1;tr|A0A1V2LMG1|A0A1V2LMG1_PICKU T-complex protein 1 subunit delta OS=Pichia kudriavzevii OX=4909 GN=BOH78_2688 PE=3 SV=1	7	5	6	23	20.5	18.5	55.734	518	0.00030788	11.588				By matching	By matching					By matching				By matching	By matching	By MS/MS	By MS/MS			305140000	0	0	0	530230	574900	0	0	0
A0A099P6P4	unreviewed	Heat shock protein 60, mitochondrial	C5L36_0A01660 CAS74_001360 JL09_g909	A0A099P6P4;A0A1V2LJ06	A0A099P6P4;A0A1V2LJ06	Pichia kudriavzevii (Yeast) (Issatchenkia orientalis)	protein refolding [GO:0042026]	mitochondrial intermembrane space [GO:0005758]; mitochondrial matrix [GO:0005759]; mitochondrial membrane [GO:0031966]; post-mRNA release spliceosomal complex [GO:0071014]	ATP binding [GO:0005524]	mitochondrial intermembrane space [GO:0005758]; mitochondrial matrix [GO:0005759]; mitochondrial membrane [GO:0031966]; post-mRNA release spliceosomal complex [GO:0071014]; ATP binding [GO:0005524]; protein refolding [GO:0042026]	tr|A0A099P6P4|A0A099P6P4_PICKU Heat shock protein 60, mitochondrial OS=Pichia kudriavzevii OX=4909 GN=C5L36_0A01660 PE=3 SV=1;tr|A0A1V2LJ06|A0A1V2LJ06_PICKU Heat shock protein 60, mitochondrial OS=Pichia kudriavzevii OX=4909 GN=BOH78_4252 PE=3 SV=1	17	11	17	44.8	44.8	31.9	60.241	571	0	323.31	By MS/MS	By MS/MS	By matching			By matching		By matching					By matching	By matching		By matching	By matching	By MS/MS	By MS/MS	5173500000	5726500	3910600	786220	0	0	1169900	0	436210
A0A099P6W9	unreviewed	Phosphoglycerate kinase (EC 2.7.2.3)	BOH78_4028 CAS74_004904 JL09_g220	A0A099P6W9;A0A2U9R041	A0A099P6W9;A0A2U9R041	Pichia kudriavzevii (Yeast) (Issatchenkia orientalis)	glycolytic process [GO:0006096]		ATP binding [GO:0005524]; phosphoglycerate kinase activity [GO:0004618]	ATP binding [GO:0005524]; phosphoglycerate kinase activity [GO:0004618]; glycolytic process [GO:0006096]	tr|A0A099P6W9|A0A099P6W9_PICKU Phosphoglycerate kinase OS=Pichia kudriavzevii OX=4909 GN=BOH78_4028 PE=3 SV=1;tr|A0A2U9R041|A0A2U9R041_PICKU Phosphoglycerate kinase OS=Pichia kudriavzevii OX=4909 GN=C5L36_0A12480 PE=3 SV=1	29	23	29	72.6	72.6	63.5	44.577	416	0	323.31	By MS/MS	By MS/MS	By matching	By matching	By matching	By matching	By matching	By matching		By matching	By matching	By matching			By matching	By matching	By MS/MS	By MS/MS	By matching	80512000000	14182000	14507000	878560	4390600	6953700	1894400	1304700	6177700
A0A099P717	unreviewed	Glucose-6-phosphate 1-dehydrogenase (EC 1.1.1.49)	BOH78_2440 C5L36_0A11100 CAS74_004759 JL09_g92	A0A099P717	A0A099P717	Pichia kudriavzevii (Yeast) (Issatchenkia orientalis)	glucose metabolic process [GO:0006006]; pentose-phosphate shunt [GO:0006098]		glucose-6-phosphate dehydrogenase activity [GO:0004345]; NADP binding [GO:0050661]	glucose-6-phosphate dehydrogenase activity [GO:0004345]; NADP binding [GO:0050661]; glucose metabolic process [GO:0006006]; pentose-phosphate shunt [GO:0006098]	tr|A0A099P717|A0A099P717_PICKU Glucose-6-phosphate 1-dehydrogenase OS=Pichia kudriavzevii OX=4909 GN=BOH78_2440 PE=3 SV=1	9	9	9	25.9	25.9	25.9	57.969	506	0	170.7	By matching	By matching				By matching										By matching			By matching	443010000	9006900	537410	0	0	0	876490	0	0
A0A099P7D4	unreviewed	Small glutamine-rich tetratricopeptide repeat-containing protein 2	BOH78_1039 C5L36_0C08900 CAS74_000912 JL09_g553	A0A099P7D4	A0A099P7D4	Pichia kudriavzevii (Yeast) (Issatchenkia orientalis)					tr|A0A099P7D4|A0A099P7D4_PICKU Small glutamine-rich tetratricopeptide repeat-containing protein 2 OS=Pichia kudriavzevii OX=4909 GN=BOH78_1039 PE=4 SV=1	11	11	11	51.7	51.7	51.7	37.121	350	0	109.25	By matching	By matching	By matching	By matching	By matching	By matching	By matching			By matching										756470000	12449000	16415000	8127100	14530000	14326000	19714000	2200600	0
A0A099P7E7	unreviewed	Pyruvate decarboxylase isozyme 3	BOH78_4243 C5L36_0A01560 JL09_g917	A0A099P7E7;A0A1Z8JR31	A0A099P7E7;A0A1Z8JR31	Pichia kudriavzevii (Yeast) (Issatchenkia orientalis)			carboxy-lyase activity [GO:0016831]; magnesium ion binding [GO:0000287]; thiamine pyrophosphate binding [GO:0030976]	carboxy-lyase activity [GO:0016831]; magnesium ion binding [GO:0000287]; thiamine pyrophosphate binding [GO:0030976]	tr|A0A099P7E7|A0A099P7E7_PICKU Pyruvate decarboxylase isozyme 3 OS=Pichia kudriavzevii OX=4909 GN=BOH78_4243 PE=3 SV=1;tr|A0A1Z8JR31|A0A1Z8JR31_PICKU Uncharacterized protein OS=Pichia kudriavzevii OX=4909 GN=CAS74_001351 PE=3 SV=1	30	29	30	75.5	75.5	73.7	63.9	575	0	323.31	By matching	By matching	By matching	By matching	By matching	By matching	By matching	By matching	By matching	By matching	By matching	By matching	By matching	By matching	By matching		By matching	By matching	By matching	135520000000	6268200	5729300	4836100	3950200	3539800	18738000	2512300	1524400
A0A099P7F2	unreviewed	T-complex protein 1 subunit zeta (T-complex protein 1, zeta subunit)	BOH78_4900 C5L36_0C08650 CAS74_000879 JL09_g533	A0A099P7F2	A0A099P7F2	Pichia kudriavzevii (Yeast) (Issatchenkia orientalis)	protein folding [GO:0006457]	chaperonin-containing T-complex [GO:0005832]	ATP binding [GO:0005524]; unfolded protein binding [GO:0051082]	chaperonin-containing T-complex [GO:0005832]; ATP binding [GO:0005524]; unfolded protein binding [GO:0051082]; protein folding [GO:0006457]	tr|A0A099P7F2|A0A099P7F2_PICKU T-complex protein 1 subunit zeta OS=Pichia kudriavzevii OX=4909 GN=BOH78_4900 PE=3 SV=1	6	5	6	14.3	14.3	10.4	58.963	539	0	143.9						By matching		By matching	By matching	By matching	By matching	By matching	By matching				By matching			242420000	0	0	0	0	0	710800	0	1157400
A0A099P7G1	unreviewed	Isoleucyl-tRNA synthetase (EC 6.1.1.5)	BOH78_1109 C5L36_0C09580 CAS74_000980 JL09_g621	A0A099P7G1	A0A099P7G1	Pichia kudriavzevii (Yeast) (Issatchenkia orientalis)	isoleucyl-tRNA aminoacylation [GO:0006428]		aminoacyl-tRNA editing activity [GO:0002161]; ATP binding [GO:0005524]; isoleucine-tRNA ligase activity [GO:0004822]; tRNA binding [GO:0000049]	aminoacyl-tRNA editing activity [GO:0002161]; ATP binding [GO:0005524]; isoleucine-tRNA ligase activity [GO:0004822]; tRNA binding [GO:0000049]; isoleucyl-tRNA aminoacylation [GO:0006428]	tr|A0A099P7G1|A0A099P7G1_PICKU Isoleucine--tRNA ligase, cytoplasmic OS=Pichia kudriavzevii OX=4909 GN=BOH78_1109 PE=3 SV=1	11	9	11	13.9	13.9	12.3	122.86	1073	0.00032123	13.074				By matching				By matching		By matching	By matching	By matching		By matching	By matching			By matching		562380000	0	0	0	6044800	0	0	0	332890
A0A099P7H2	unreviewed	Plasma membrane ATPase (EC 7.1.2.1)	BOH78_1086 C5L36_0C09350 CAS74_000958 JL09_g597	A0A099P7H2	A0A099P7H2	Pichia kudriavzevii (Yeast) (Issatchenkia orientalis)	proton export across plasma membrane [GO:0120029]	integral component of membrane [GO:0016021]; plasma membrane [GO:0005886]	ATP binding [GO:0005524]; proton-exporting ATPase activity, phosphorylative mechanism [GO:0008553]	integral component of membrane [GO:0016021]; plasma membrane [GO:0005886]; ATP binding [GO:0005524]; proton-exporting ATPase activity, phosphorylative mechanism [GO:0008553]; proton export across plasma membrane [GO:0120029]	tr|A0A099P7H2|A0A099P7H2_PICKU Plasma membrane ATPase OS=Pichia kudriavzevii OX=4909 GN=BOH78_1086 PE=3 SV=1	22	15	16	37	27	25.3	99.177	909	0	323.31	By matching	By matching		By matching			By matching			By matching	By matching	By matching	By matching	By matching	By matching	By matching	By MS/MS	By matching	By MS/MS	12296000000	1392900	0	0	636290	0	0	217270	0
A0A099P7U5	unreviewed	Acetohydroxy-acid reductoisomerase (Alpha-keto-beta-hydroxylacyl reductoisomerase)	BOH78_0302 C5L36_0E00720 CAS74_003184 JL09_g756	A0A099P7U5;M7XVW7;A0A194S147	A0A099P7U5	Pichia kudriavzevii (Yeast) (Issatchenkia orientalis)	isoleucine biosynthetic process [GO:0009097]; valine biosynthetic process [GO:0009099]		isomerase activity [GO:0016853]; ketol-acid reductoisomerase activity [GO:0004455]; metal ion binding [GO:0046872]	isomerase activity [GO:0016853]; ketol-acid reductoisomerase activity [GO:0004455]; metal ion binding [GO:0046872]; isoleucine biosynthetic process [GO:0009097]; valine biosynthetic process [GO:0009099]	tr|A0A099P7U5|A0A099P7U5_PICKU Ketol-acid reductoisomerase, mitochondrial OS=Pichia kudriavzevii OX=4909 GN=BOH78_0302 PE=3 SV=1	12	7	9	48.1	38.4	29	43.803	393	0	323.31	By matching	By matching	By matching	By matching	By matching	By matching	By matching	By matching	By matching	By matching	By matching	By matching	By matching			By matching	By matching	By matching	By matching	5147600000	1335000	0	369970	0	0	0	1849100	543950
A0A099P8A4	unreviewed	Fructose-bisphosphate aldolase (FBP aldolase) (EC 4.1.2.13)	C5L36_0C08600 CAS74_000873 JL09_g527	A0A099P8A4;A0A1V2LGF2	A0A099P8A4;A0A1V2LGF2	Pichia kudriavzevii (Yeast) (Issatchenkia orientalis)	gluconeogenesis [GO:0006094]; glycolytic process [GO:0006096]	cytosol [GO:0005829]; mitochondrion [GO:0005739]	fructose-bisphosphate aldolase activity [GO:0004332]; melatonin binding [GO:1904408]; zinc ion binding [GO:0008270]	cytosol [GO:0005829]; mitochondrion [GO:0005739]; fructose-bisphosphate aldolase activity [GO:0004332]; melatonin binding [GO:1904408]; zinc ion binding [GO:0008270]; gluconeogenesis [GO:0006094]; glycolytic process [GO:0006096]	tr|A0A099P8A4|A0A099P8A4_PICKU Fructose-bisphosphate aldolase OS=Pichia kudriavzevii OX=4909 GN=C5L36_0C08600 PE=4 SV=1;tr|A0A1V2LGF2|A0A1V2LGF2_PICKU Fructose-bisphosphate aldolase OS=Pichia kudriavzevii OX=4909 GN=BOH78_4893 PE=4 SV=1	23	19	23	73.8	73.8	68.8	39.67	359	0	323.31	By matching	By matching	By matching	By matching	By matching	By matching	By matching	By matching	By matching	By matching	By matching		By matching	By matching	By matching		By MS/MS	By matching	By MS/MS	79057000000	2996200	4324200	1620500	6606700	1134600	325230	2424000	2256100
A0A099P8B4	unreviewed	Mitochondrial import inner membrane translocase subunit TIM23	BOH78_1076 C5L36_0C09240 CAS74_000948 JL09_g587	A0A099P8B4	A0A099P8B4	Pichia kudriavzevii (Yeast) (Issatchenkia orientalis)					tr|A0A099P8B4|A0A099P8B4_PICKU Mitochondrial import inner membrane translocase subunit TIM23 OS=Pichia kudriavzevii OX=4909 GN=BOH78_1076 PE=4 SV=1	3	3	3	20.3	20.3	20.3	24.068	227	0.00029931	10.715								By matching		By matching					By matching		By matching	By matching	By matching	132440000	0	0	0	0	0	0	0	492330
A0A099P8F1	unreviewed	Ras-related protein SEC4	BOH78_1719 C5L36_0C03260 CAS74_000336 JL09_g385	A0A099P8F1	A0A099P8F1	Pichia kudriavzevii (Yeast) (Issatchenkia orientalis)			GTPase activity [GO:0003924]; GTP binding [GO:0005525]	GTP binding [GO:0005525]; GTPase activity [GO:0003924]	tr|A0A099P8F1|A0A099P8F1_PICKU Ras-related protein SEC4 OS=Pichia kudriavzevii OX=4909 GN=BOH78_1719 PE=4 SV=1	2	2	2	14.7	14.7	14.7	22.396	204	0	29.659		By matching	By matching				By matching	By matching		By matching	By matching	By matching		By matching	By matching	By matching	By matching	By matching		151320000	0	1851100	1095900	0	0	0	759060	533970
A0A099P8U3	unreviewed	Glyceraldehyde-3-phosphate dehydrogenase (EC 1.2.1.12)	C5L36_0A12800 CAS74_004932 JL09_g247	A0A099P8U3;A0A1V2LI93;A0A061B8Q1	A0A099P8U3;A0A1V2LI93	Pichia kudriavzevii (Yeast) (Issatchenkia orientalis)	glucose metabolic process [GO:0006006]; glycolytic process [GO:0006096]	cytoplasm [GO:0005737]	glyceraldehyde-3-phosphate dehydrogenase (NAD+) (phosphorylating) activity [GO:0004365]; NAD binding [GO:0051287]; NADP binding [GO:0050661]	cytoplasm [GO:0005737]; glyceraldehyde-3-phosphate dehydrogenase (NAD+) (phosphorylating) activity [GO:0004365]; NAD binding [GO:0051287]; NADP binding [GO:0050661]; glucose metabolic process [GO:0006006]; glycolytic process [GO:0006096]	tr|A0A099P8U3|A0A099P8U3_PICKU Glyceraldehyde-3-phosphate dehydrogenase OS=Pichia kudriavzevii OX=4909 GN=C5L36_0A12800 PE=3 SV=1;tr|A0A1V2LI93|A0A1V2LI93_PICKU Glyceraldehyde-3-phosphate dehydrogenase OS=Pichia kudriavzevii OX=4909 GN=BOH78_4052 PE=3 SV=1	20	14	14	77	55.2	55.2	35.809	335	0	323.31	By matching	By matching	By matching	By MS/MS	By matching	By matching	By matching	By matching	By matching	By matching	By matching	By matching	By matching	By matching	By matching	By matching	By matching	By matching	By matching	88702000000	19833000	0	0	14934000	530550	11754000	0	702600
A0A099P9E1	unreviewed	Ribonucleoside-diphosphate reductase (EC 1.17.4.1)	CAS74_004912 JL09_g227	A0A099P9E1;A0A1V2LJQ7;A0A2U9R049;Q5A0N3;G1U9X5;C4YJR4;G8BE28;A0A1V2L2P1	A0A099P9E1;A0A1V2LJQ7;A0A2U9R049	Pichia kudriavzevii (Yeast) (Issatchenkia orientalis)	CDP metabolic process [GO:0046704]; dCDP biosynthetic process [GO:0006240]; DNA replication [GO:0006260]; dTTP biosynthetic process [GO:0006235]	ribonucleoside-diphosphate reductase complex [GO:0005971]	ATP binding [GO:0005524]; calcium ion binding [GO:0005509]; CDP reductase activity [GO:0051063]	ribonucleoside-diphosphate reductase complex [GO:0005971]; ATP binding [GO:0005524]; calcium ion binding [GO:0005509]; CDP reductase activity [GO:0051063]; CDP metabolic process [GO:0046704]; dCDP biosynthetic process [GO:0006240]; DNA replication [GO:0006260]; dTTP biosynthetic process [GO:0006235]	tr|A0A099P9E1|A0A099P9E1_PICKU Ribonucleoside-diphosphate reductase OS=Pichia kudriavzevii OX=4909 GN=CAS74_004912 PE=3 SV=1;tr|A0A1V2LJQ7|A0A1V2LJQ7_PICKU Ribonucleoside-diphosphate reductase OS=Pichia kudriavzevii OX=4909 GN=BOH78_4034 PE=3 SV=1;tr|A0A2U	12	7	12	18	18	11.9	114.61	1019	0	323.31	By matching						By matching	By matching	By matching				By matching	By matching	By matching	By matching	By matching	By matching		3102300000	624500	0	0	0	0	0	2431000	2431700
A0A0B4J1H6	unreviewed	Immunoglobulin kappa chain variable 2-137 (Fragment)	Igkv2-137	A0A0B4J1H6;P01630	A0A0B4J1H6;P01630	Mus musculus (Mouse)	immune response [GO:0006955]; immunoglobulin production [GO:0002377]; response to bacterium [GO:0009617]	extracellular space [GO:0005615]		extracellular space [GO:0005615]; immune response [GO:0006955]; immunoglobulin production [GO:0002377]; response to bacterium [GO:0009617]	tr|A0A0B4J1H6|A0A0B4J1H6_MOUSE Immunoglobulin kappa chain variable 2-137 (Fragment) OS=Mus musculus OX=10090 GN=Igkv2-137 PE=4 SV=1;sp|P01630|KV2A6_MOUSE Ig kappa chain V-II region 7S34.1 OS=Mus musculus OX=10090 PE=1 SV=1	3	1	3	29.2	29.2	9.2	13.131	120	0.00026127	7.3053		By matching		By matching		By MS/MS						By matching	By matching						By matching	461320000	0	499780	0	1950900	0	9376200	0	0
A0A0B4J1J2	unreviewed	Immunoglobulin kappa chain variable 5-43 (Fragment)	Igkv5-43	A0A0B4J1J2	A0A0B4J1J2	Mus musculus (Mouse)	immune response [GO:0006955]; immunoglobulin production [GO:0002377]	extracellular space [GO:0005615]		extracellular space [GO:0005615]; immune response [GO:0006955]; immunoglobulin production [GO:0002377]	tr|A0A0B4J1J2|A0A0B4J1J2_MOUSE Immunoglobulin kappa chain variable 5-43 (Fragment) OS=Mus musculus OX=10090 GN=Igkv5-43 PE=1 SV=1	2	1	2	23.5	23.5	13	12.6	115	0	111.56			By MS/MS	By MS/MS	By MS/MS	By MS/MS					By MS/MS	By MS/MS	By MS/MS	By matching			By MS/MS	By matching	By matching	1426900000	0	0	3149200	11972000	6875800	12567000	0	0
A0A0B4J1J7	unreviewed	Immunoglobulin heavy variable 1-82	Ighv1-82	A0A0B4J1J7;X5J5T6;X5J530;Q9D9B8;X5J4Z4;X5J4I5;X5J5P3;X5J4H0;X5J529;X5J5D6;X5J5D5;X5J532;X5J531;X5J4U0;X5J4L3;X5J5P2;X5J4S4;X5J4S3;X5J5P4;X5J4G7;X5J5P5;X5J5M7;X5J4T2;X5J5E5;X5J4H8;A0A0G2JEU7	A0A0B4J1J7	Mus musculus (Mouse)	B cell receptor signaling pathway [GO:0050853]; complement activation, classical pathway [GO:0006958]; defense response to bacterium [GO:0042742]; innate immune response [GO:0045087]; phagocytosis, engulfment [GO:0006911]; phagocytosis, recognition [GO:0006910]; positive regulation of B cell activation [GO:0050871]	external side of plasma membrane [GO:0009897]; immunoglobulin complex, circulating [GO:0042571]	antigen binding [GO:0003823]; immunoglobulin receptor binding [GO:0034987]	external side of plasma membrane [GO:0009897]; immunoglobulin complex, circulating [GO:0042571]; antigen binding [GO:0003823]; immunoglobulin receptor binding [GO:0034987]; B cell receptor signaling pathway [GO:0050853]; complement activation, classical pathway [GO:0006958]; defense response to bacterium [GO:0042742]; innate immune response [GO:0045087]; phagocytosis, engulfment [GO:0006911]; pha…	tr|A0A0B4J1J7|A0A0B4J1J7_MOUSE Immunoglobulin heavy variable 1-82 OS=Mus musculus OX=10090 GN=Ighv1-82 PE=1 SV=1	3	3	3	32.7	32.7	32.7	10.65	98	0.0003108	11.907												By MS/MS	By MS/MS				By MS/MS			566000000	0	0	0	0	0	0	0	0
A0A0B4J1N0	unreviewed	Immunoglobulin heavy variable 1-76	Ighv1-76	A0A0B4J1N0;A0A0G2JFE9;X5J5L2;Q6PF95	A0A0B4J1N0;A0A0G2JFE9;X5J5L2	Mus musculus (Mouse)	B cell receptor signaling pathway [GO:0050853]; complement activation, classical pathway [GO:0006958]; defense response to bacterium [GO:0042742]; innate immune response [GO:0045087]; phagocytosis, engulfment [GO:0006911]; phagocytosis, recognition [GO:0006910]; positive regulation of B cell activation [GO:0050871]	external side of plasma membrane [GO:0009897]; immunoglobulin complex, circulating [GO:0042571]	antigen binding [GO:0003823]; immunoglobulin receptor binding [GO:0034987]	external side of plasma membrane [GO:0009897]; immunoglobulin complex, circulating [GO:0042571]; antigen binding [GO:0003823]; immunoglobulin receptor binding [GO:0034987]; B cell receptor signaling pathway [GO:0050853]; complement activation, classical pathway [GO:0006958]; defense response to bacterium [GO:0042742]; innate immune response [GO:0045087]; phagocytosis, engulfment [GO:0006911]; pha…	tr|A0A0B4J1N0|A0A0B4J1N0_MOUSE Immunoglobulin heavy variable 1-76 OS=Mus musculus OX=10090 GN=Ighv1-76 PE=1 SV=1;tr|A0A0G2JFE9|A0A0G2JFE9_MOUSE Immunoglobulin heavy variable 1-76 (Fragment) OS=Mus musculus OX=10090 GN=Ighv1-76 PE=1 SV=1;tr|X5J5L2|X5J5L2_MO	4	3	4	55.1	55.1	39.8	10.879	98	0.00028789	9.6437				By MS/MS	By MS/MS					By matching	By MS/MS							By MS/MS	By MS/MS	362360000	0	0	0	939700	1573700	0	0	0
A0A0B6VSQ6	unreviewed	Kallikrein 1 (Kallikrein a13)	Klk1 Klna13	A0A0B6VSQ6;P15947;A0A0U1RPN5;Q7M0B4;A0A1R3UCI2;P15945;A0A1R3UDS6;P15946	A0A0B6VSQ6;P15947;A0A0U1RPN5	Mus musculus (Mouse)			serine-type endopeptidase activity [GO:0004252]	serine-type endopeptidase activity [GO:0004252]	tr|A0A0B6VSQ6|A0A0B6VSQ6_MOUSE Kallikrein 1 OS=Mus musculus OX=10090 GN=Klk1 PE=1 SV=1;sp|P15947|KLK1_MOUSE Kallikrein-1 OS=Mus musculus OX=10090 GN=Klk1 PE=1 SV=3;tr|A0A0U1RPN5|A0A0U1RPN5_MOUSE Kallikrein-1 (Fragment) OS=Mus musculus OX=10090 GN=Klk1 PE=1	10	9	10	49.4	49.4	46	28.774	261	0	57.385	By matching	By MS/MS	By matching	By MS/MS	By matching	By MS/MS	By MS/MS	By MS/MS	By MS/MS	By MS/MS	By MS/MS	By MS/MS	By MS/MS	By MS/MS	By MS/MS	By MS/MS	By MS/MS	By MS/MS	By MS/MS	2884000000	15158000	17200000	18417000	22534000	16596000	35291000	40780000	42647000
A0A0D3M033	unreviewed	Odorant binding protein 7	Obp1b OBP7	A0A0D3M033;A2BHD2;A2AEP0;A0A0D3M034	A0A0D3M033;A2BHD2;A2AEP0;A0A0D3M034	Mus musculus domesticus (western European house mouse)		extracellular region [GO:0005576]	small molecule binding [GO:0036094]	extracellular region [GO:0005576]; small molecule binding [GO:0036094]	tr|A0A0D3M033|A0A0D3M033_MOUSE Odorant binding protein 7 OS=Mus musculus domesticus OX=10092 GN=Obp1b PE=2 SV=1;tr|A2BHD2|A2BHD2_MOUSE Predicted gene 14743 OS=Mus musculus OX=10090 GN=Gm14743 PE=3 SV=1;sp|A2AEP0|OBP1B_MOUSE Odorant-binding protein 1b OS=Mu	10	10	10	58.2	58.2	58.2	19.263	170	0	83.793	By MS/MS	By MS/MS	By MS/MS	By MS/MS	By MS/MS	By MS/MS	By MS/MS	By MS/MS	By MS/MS	By MS/MS	By MS/MS	By MS/MS	By MS/MS	By MS/MS	By MS/MS	By MS/MS	By MS/MS	By MS/MS	By MS/MS	2158300000	33021000	30094000	35231000	31786000	141130000	30817000	11986000	14159000
A0A0D3M042	unreviewed	Odorant binding protein 5	Obp1a OBP5	A0A0D3M042;Q9D3H2;A0A0D3M043	A0A0D3M042;Q9D3H2;A0A0D3M043	Mus musculus domesticus (western European house mouse)		extracellular region [GO:0005576]	small molecule binding [GO:0036094]	extracellular region [GO:0005576]; small molecule binding [GO:0036094]	tr|A0A0D3M042|A0A0D3M042_MOUSE Odorant binding protein 5 OS=Mus musculus domesticus OX=10092 GN=Obp1a PE=2 SV=1;sp|Q9D3H2|OBP1A_MOUSE Odorant-binding protein 1a OS=Mus musculus OX=10090 GN=Obp1a PE=1 SV=2;tr|A0A0D3M043|A0A0D3M043_MOUSE Odorant binding prot	4	4	4	31.3	31.3	31.3	18.568	163	0	243.99	By MS/MS	By MS/MS	By MS/MS	By MS/MS	By MS/MS	By MS/MS					By matching	By MS/MS	By matching	By MS/MS	By MS/MS	By MS/MS	By MS/MS	By MS/MS	By MS/MS	1048300000	3411100	3578900	4861500	6066400	5858600	0	0	0
A0A0G2JGI9	unreviewed	4-alpha-glucanotransferase (EC 2.4.1.25) (EC 3.2.1.33) (Amylo-alpha-1,6-glucosidase) (Dextrin 6-alpha-D-glucosidase) (Glycogen debrancher) (Glycogen debranching enzyme) (Oligo-1,4-1,4-glucantransferase)	Agl	A0A0G2JGI9;F8VPN4;E0CX86;E0CYU6;F6XXE6	A0A0G2JGI9;F8VPN4;E0CX86;E0CYU6;F6XXE6	Mus musculus (Mouse)	glycogen biosynthetic process [GO:0005978]; glycogen catabolic process [GO:0005980]; glycogen metabolic process [GO:0005977]; response to glucocorticoid [GO:0051384]; response to hormone [GO:0009725]; response to nutrient [GO:0007584]	cytoplasm [GO:0005737]; inclusion body [GO:0016234]; nucleus [GO:0005634]; sarcoplasmic reticulum [GO:0016529]	4-alpha-glucanotransferase activity [GO:0004134]; amylo-alpha-1,6-glucosidase activity [GO:0004135]; beta-maltose 4-alpha-glucanotransferase activity [GO:0102500]; carbohydrate binding [GO:0030246]; glycogen debranching enzyme activity [GO:0004133]; polysaccharide binding [GO:0030247]; polyubiquitin modification-dependent protein binding [GO:0031593]	cytoplasm [GO:0005737]; inclusion body [GO:0016234]; nucleus [GO:0005634]; sarcoplasmic reticulum [GO:0016529]; 4-alpha-glucanotransferase activity [GO:0004134]; amylo-alpha-1,6-glucosidase activity [GO:0004135]; beta-maltose 4-alpha-glucanotransferase activity [GO:0102500]; carbohydrate binding [GO:0030246]; glycogen debranching enzyme activity [GO:0004133]; polysaccharide binding [GO:0030247]; …	tr|A0A0G2JGI9|A0A0G2JGI9_MOUSE Amylo-1,6-glucosidase, 4-alpha-glucanotransferase OS=Mus musculus OX=10090 GN=Agl PE=1 SV=1;tr|F8VPN4|F8VPN4_MOUSE Amylo-1,6-glucosidase, 4-alpha-glucanotransferase OS=Mus musculus OX=10090 GN=Agl PE=1 SV=1;tr|E0CX86|E0CX86_M	2	2	2	1.3	1.3	1.3	145.13	1279	0.0072245	1.7355	By matching	By matching	By matching	By matching	By matching	By MS/MS				By matching	By matching	By matching	By matching		By matching	By MS/MS		By matching	By matching	206590000	7034000	9263700	8898600	7973600	10389000	7063200	0	0
A0A0J9YKD4	unreviewed	Creatine kinase (EC 2.7.3.2)	Ckm	A0A0J9YKD4;Q9D6U7;A2RTA0;P07310	A0A0J9YKD4;Q9D6U7;A2RTA0;P07310	Mus musculus (Mouse)	phosphocreatine biosynthetic process [GO:0046314]		ATP binding [GO:0005524]; creatine kinase activity [GO:0004111]	ATP binding [GO:0005524]; creatine kinase activity [GO:0004111]; phosphocreatine biosynthetic process [GO:0046314]	tr|A0A0J9YKD4|A0A0J9YKD4_MOUSE Creatine kinase M-type OS=Mus musculus OX=10090 GN=Ckm PE=1 SV=1;tr|Q9D6U7|Q9D6U7_MOUSE Uncharacterized protein OS=Mus musculus OX=10090 GN=Ckm PE=2 SV=1;tr|A2RTA0|A2RTA0_MOUSE Creatine kinase, muscle OS=Mus musculus OX=10090	5	5	5	15.4	15.4	15.4	35.108	312	0.00051862	3.8495	By MS/MS	By matching	By MS/MS	By MS/MS	By MS/MS	By MS/MS	By matching	By MS/MS	By matching	By matching	By matching	By MS/MS	By MS/MS	By matching	By matching	By matching	By matching	By matching	By matching	15688000000	627760000	614220000	597150000	623070000	643370000	326090000	134780000	132830000
A0A0J9YVE6	unreviewed	Maltase-glucoamylase	Mgam	A0A0J9YVE6	A0A0J9YVE6	Mus musculus (Mouse)	carbohydrate metabolic process [GO:0005975]	membrane [GO:0016020]	alpha-1,4-glucosidase activity [GO:0004558]; amylase activity [GO:0016160]; carbohydrate binding [GO:0030246]	membrane [GO:0016020]; alpha-1,4-glucosidase activity [GO:0004558]; amylase activity [GO:0016160]; carbohydrate binding [GO:0030246]; carbohydrate metabolic process [GO:0005975]	tr|A0A0J9YVE6|A0A0J9YVE6_MOUSE Maltase-glucoamylase OS=Mus musculus OX=10090 GN=Mgam PE=1 SV=1	32	7	13	39.7	15.4	6.4	137.7	1200	0	70.237	By MS/MS	By MS/MS	By MS/MS	By MS/MS	By MS/MS	By MS/MS	By MS/MS	By MS/MS	By MS/MS	By MS/MS	By MS/MS	By MS/MS	By MS/MS	By MS/MS	By MS/MS	By MS/MS	By MS/MS	By MS/MS	By MS/MS	3601300000	82572000	83257000	85582000	86163000	110400000	106530000	43809000	45710000
A0A0K3C6Q3	unreviewed	FGENESH: predicted gene_1.384 protein (Fragment)	FGENESH: predicted gene_1.384 BN2166_0003840	A0A0K3C6Q3;M7WMJ7;A0A061AQ74;A0A2S5BEV0;A0A125PI93	A0A0K3C6Q3;M7WMJ7;A0A061AQ74;A0A2S5BEV0;A0A125PI93	Rhodosporidium toruloides (Yeast) (Rhodotorula gracilis)		mitochondrial intermembrane space [GO:0005758]; respirasome [GO:0070469]	electron transfer activity [GO:0009055]; heme binding [GO:0020037]; metal ion binding [GO:0046872]	mitochondrial intermembrane space [GO:0005758]; respirasome [GO:0070469]; electron transfer activity [GO:0009055]; heme binding [GO:0020037]; metal ion binding [GO:0046872]	tr|A0A0K3C6Q3|A0A0K3C6Q3_RHOTO FGENESH: predicted gene_1.384 protein (Fragment) OS=Rhodosporidium toruloides OX=5286 GN=FGENESH: predicted gene_1.384 PE=3 SV=1;tr|M7WMJ7|M7WMJ7_RHOT1 Cytochrome c OS=Rhodosporidium toruloides (strain NP11) OX=1130832 GN=RHT	6	3	6	52.3	52.3	28	11.67	107	0	213.88								By matching		By matching			By matching				By MS/MS	By MS/MS	By MS/MS	1648800000	0	0	0	0	0	0	0	1253300
A0A0N4SUM3	unreviewed	Lysophospholipid acyltransferase 5	Lpcat3	A0A0N4SUM3;Q91V01	A0A0N4SUM3;Q91V01	Mus musculus (Mouse)		integral component of membrane [GO:0016021]		integral component of membrane [GO:0016021]	tr|A0A0N4SUM3|A0A0N4SUM3_MOUSE Lysophospholipid acyltransferase 5 OS=Mus musculus OX=10090 GN=Lpcat3 PE=1 SV=1;sp|Q91V01|MBOA5_MOUSE Lysophospholipid acyltransferase 5 OS=Mus musculus OX=10090 GN=Lpcat3 PE=1 SV=1	1	1	1	13.1	13.1	13.1	11.278	99	0.008379	1.6639	By matching	By MS/MS	By matching				By matching	By matching			By matching		By matching			By MS/MS	By MS/MS			66323000	2597700	2651200	1809700	0	0	0	1318500	1121200
A0A0N4SVT3	unreviewed	Guanine nucleotide-binding protein subunit gamma (Fragment)	Gng12	A0A0N4SVT3;A0A0N4SW28;Q9DAS9	A0A0N4SVT3;A0A0N4SW28;Q9DAS9	Mus musculus (Mouse)	G protein-coupled receptor signaling pathway [GO:0007186]	heterotrimeric G-protein complex [GO:0005834]	G-protein beta-subunit binding [GO:0031681]	heterotrimeric G-protein complex [GO:0005834]; G-protein beta-subunit binding [GO:0031681]; G protein-coupled receptor signaling pathway [GO:0007186]	tr|A0A0N4SVT3|A0A0N4SVT3_MOUSE Guanine nucleotide-binding protein subunit gamma (Fragment) OS=Mus musculus OX=10090 GN=Gng12 PE=1 SV=1;tr|A0A0N4SW28|A0A0N4SW28_MOUSE Guanine nucleotide-binding protein subunit gamma OS=Mus musculus OX=10090 GN=Gng12 PE=1 SV	2	2	2	46.2	46.2	46.2	7.1971	65	0.00043459	4.3599						By matching								By MS/MS	By MS/MS	By MS/MS	By MS/MS	By MS/MS	By MS/MS	95906000	0	0	0	0	0	2591800	0	0
A0A0N8PZH8	unreviewed	60S ribosomal protein L6	RHOBADRAFT_18153	A0A0N8PZH8	A0A0N8PZH8	Rhodotorula graminis (strain WP1)	translation [GO:0006412]	ribosome [GO:0005840]	structural constituent of ribosome [GO:0003735]	ribosome [GO:0005840]; structural constituent of ribosome [GO:0003735]; translation [GO:0006412]	tr|A0A0N8PZH8|A0A0N8PZH8_RHOGW 60S ribosomal protein L6 OS=Rhodotorula graminis (strain WP1) OX=578459 GN=RHOBADRAFT_18153 PE=3 SV=1	2	1	1	12.5	6.9	6.9	23.672	216	0.00059916	3.4598	By MS/MS	By MS/MS	By MS/MS	By matching	By matching	By MS/MS	By MS/MS	By MS/MS	By MS/MS	By MS/MS	By MS/MS	By MS/MS	By MS/MS	By MS/MS	By MS/MS	By MS/MS	By MS/MS	By MS/MS	By MS/MS	112210000	3413300	2991500	4119300	0	1407100	3439800	2563900	2062300
A0A0P9F1T0	unreviewed	Uncharacterized protein	RHOBADRAFT_54798	A0A0P9F1T0	A0A0P9F1T0	Rhodotorula graminis (strain WP1)	meiotic cell cycle [GO:0051321]; regulation of synaptonemal complex assembly [GO:0090173]			meiotic cell cycle [GO:0051321]; regulation of synaptonemal complex assembly [GO:0090173]	tr|A0A0P9F1T0|A0A0P9F1T0_RHOGW Uncharacterized protein OS=Rhodotorula graminis (strain WP1) OX=578459 GN=RHOBADRAFT_54798 PE=4 SV=1	2	2	2	4.1	4.1	4.1	108.81	993	0.0062954	1.8361	By MS/MS	By MS/MS	By MS/MS	By MS/MS	By MS/MS	By MS/MS	By matching	By matching	By MS/MS	By matching	By matching	By MS/MS	By matching	By MS/MS		By matching	By matching	By matching	By matching	973050000	32077000	11909000	33785000	22003000	7236100	5198900	4707800	9123200
A0A0P9GIN8	unreviewed	Uncharacterized protein	RHOBADRAFT_55536	A0A0P9GIN8	A0A0P9GIN8	Rhodotorula graminis (strain WP1)			ligase activity [GO:0016874]; phosphopantetheine binding [GO:0031177]	ligase activity [GO:0016874]; phosphopantetheine binding [GO:0031177]	tr|A0A0P9GIN8|A0A0P9GIN8_RHOGW Uncharacterized protein OS=Rhodotorula graminis (strain WP1) OX=578459 GN=RHOBADRAFT_55536 PE=4 SV=1	2	2	2	1.5	1.5	1.5	167.86	1554	0.0046948	1.9583	By matching	By matching	By matching	By matching	By matching															41578000	1198100	1869900	1657000	2039400	2127000	0	0	0
A0A0R3P9C8	unreviewed	NADH dehydrogenase [ubiquinone] 1 alpha subcomplex subunit 9, mitochondrial	Ndufa9	A0A0R3P9C8;Q9DC69	A0A0R3P9C8;Q9DC69	Mus musculus (Mouse)					tr|A0A0R3P9C8|A0A0R3P9C8_MOUSE NADH dehydrogenase [ubiquinone] 1 alpha subcomplex subunit 9, mitochondrial OS=Mus musculus OX=10090 GN=Ndufa9 PE=1 SV=1;sp|Q9DC69|NDUA9_MOUSE NADH dehydrogenase [ubiquinone] 1 alpha subcomplex subunit 9, mitochondrial OS=Mus	3	3	3	14.2	14.2	14.2	42.121	373	0.00028608	9.4476	By MS/MS	By matching	By matching	By matching	By MS/MS	By matching	By matching	By matching	By matching	By matching	By matching	By MS/MS	By MS/MS	By matching	By MS/MS	By MS/MS	By matching	By MS/MS	By MS/MS	136770000	3977100	4352100	3271700	1186200	1064900	1147800	2623800	1351700
A0A0R4J042	unreviewed	Resistin-like beta	Retnlb	A0A0R4J042;Q8K425;Q99P86	A0A0R4J042;Q8K425;Q99P86	Mus musculus (Mouse)		extracellular region [GO:0005576]	hormone activity [GO:0005179]	extracellular region [GO:0005576]; hormone activity [GO:0005179]	tr|A0A0R4J042|A0A0R4J042_MOUSE Resistin-like beta OS=Mus musculus OX=10090 GN=Retnlb PE=4 SV=1;tr|Q8K425|Q8K425_MOUSE Resistin-like molecule beta OS=Mus musculus OX=10090 GN=Retnlb PE=2 SV=1;sp|Q99P86|RETNB_MOUSE Resistin-like beta OS=Mus musculus OX=10090	2	2	2	28.6	28.6	28.6	11.244	105	0.0030542	2.1435	By matching	By matching	By MS/MS				By matching			By matching							By MS/MS		By matching	62710000	1466200	1502700	6730000	0	0	0	303080	0
A0A0R4J043	unreviewed	Meprin A subunit (EC 3.4.24.-) (Endopeptidase-2)	Mep1a	A0A0R4J043;P28825;Q3TP44;Q3UWD0	A0A0R4J043;P28825;Q3TP44	Mus musculus (Mouse)		meprin A complex [GO:0017090]	metalloendopeptidase activity [GO:0004222]; zinc ion binding [GO:0008270]	meprin A complex [GO:0017090]; metalloendopeptidase activity [GO:0004222]; zinc ion binding [GO:0008270]	tr|A0A0R4J043|A0A0R4J043_MOUSE Meprin A subunit OS=Mus musculus OX=10090 GN=Mep1a PE=1 SV=1;sp|P28825|MEP1A_MOUSE Meprin A subunit alpha OS=Mus musculus OX=10090 GN=Mep1a PE=1 SV=4;tr|Q3TP44|Q3TP44_MOUSE Metalloendopeptidase (Fragment) OS=Mus musculus OX=1	14	14	14	30	30	30	85.664	760	0	171.38	By MS/MS	By MS/MS	By MS/MS	By MS/MS	By MS/MS	By MS/MS	By MS/MS	By MS/MS	By MS/MS	By MS/MS	By MS/MS	By MS/MS	By MS/MS	By MS/MS	By MS/MS	By MS/MS	By MS/MS	By MS/MS	By MS/MS	3453000000	69102000	75938000	57090000	51204000	61332000	48003000	38267000	33438000
A0A0R4J077	unreviewed	Pentaxin (Pentraxin)	Mptx1	A0A0R4J077	A0A0R4J077	Mus musculus (Mouse)		extracellular region [GO:0005576]	metal ion binding [GO:0046872]	extracellular region [GO:0005576]; metal ion binding [GO:0046872]	tr|A0A0R4J077|A0A0R4J077_MOUSE Pentaxin OS=Mus musculus OX=10090 GN=Mptx1 PE=1 SV=1	6	3	4	52.1	35.2	25.6	24.524	219	0.00033047	14.098	By MS/MS	By MS/MS	By MS/MS	By MS/MS	By MS/MS	By MS/MS	By matching	By matching	By matching	By MS/MS	By matching	By MS/MS	By MS/MS	By matching	By MS/MS	By MS/MS	By MS/MS	By MS/MS	By MS/MS	1235300000	34994000	18189000	9038600	1520200	39405000	35714000	3525900	23624000
A0A0R4J083	unreviewed	Long-chain specific acyl-CoA dehydrogenase, mitochondrial (EC 1.3.8.8)	Acadl	A0A0R4J083;P51174	A0A0R4J083;P51174	Mus musculus (Mouse)	fatty acid beta-oxidation using acyl-CoA dehydrogenase [GO:0033539]; long-chain fatty acid catabolic process [GO:0042758]	mitochondrial matrix [GO:0005759]; mitochondrial membrane [GO:0031966]	fatty-acyl-CoA binding [GO:0000062]; flavin adenine dinucleotide binding [GO:0050660]; identical protein binding [GO:0042802]; long-chain-acyl-CoA dehydrogenase activity [GO:0004466]	mitochondrial matrix [GO:0005759]; mitochondrial membrane [GO:0031966]; fatty-acyl-CoA binding [GO:0000062]; flavin adenine dinucleotide binding [GO:0050660]; identical protein binding [GO:0042802]; long-chain-acyl-CoA dehydrogenase activity [GO:0004466]; fatty acid beta-oxidation using acyl-CoA dehydrogenase [GO:0033539]; long-chain fatty acid catabolic process [GO:0042758]	tr|A0A0R4J083|A0A0R4J083_MOUSE Long-chain-specific acyl-CoA dehydrogenase, mitochondrial OS=Mus musculus OX=10090 GN=Acadl PE=1 SV=1;sp|P51174|ACADL_MOUSE Long-chain specific acyl-CoA dehydrogenase, mitochondrial OS=Mus musculus OX=10090 GN=Acadl PE=1 SV=2	4	4	4	11.2	11.2	11.2	47.896	430	0.00026663	7.716	By MS/MS	By MS/MS	By MS/MS	By matching	By matching	By matching		By matching		By matching	By matching		By matching	By MS/MS	By MS/MS	By MS/MS	By MS/MS	By matching	By MS/MS	140250000	9584200	8454900	9001200	1537200	3115100	873060	0	877640
A0A0R4J0B2	unreviewed	Phospholipase B-like (EC 3.1.1.-)	Plbd1	A0A0R4J0B2;Q8VCI0	A0A0R4J0B2;Q8VCI0	Mus musculus (Mouse)	lipid catabolic process [GO:0016042]	extracellular space [GO:0005615]	phospholipase activity [GO:0004620]	extracellular space [GO:0005615]; phospholipase activity [GO:0004620]; lipid catabolic process [GO:0016042]	tr|A0A0R4J0B2|A0A0R4J0B2_MOUSE Phospholipase B-like OS=Mus musculus OX=10090 GN=Plbd1 PE=1 SV=1;sp|Q8VCI0|PLBL1_MOUSE Phospholipase B-like 1 OS=Mus musculus OX=10090 GN=Plbd1 PE=1 SV=1	7	7	7	19.8	19.8	19.8	63.018	550	0	31.318	By MS/MS	By matching	By matching	By MS/MS	By matching	By MS/MS	By MS/MS	By matching	By matching	By MS/MS	By MS/MS	By MS/MS	By matching	By MS/MS	By MS/MS	By MS/MS	By MS/MS	By MS/MS	By MS/MS	524820000	7993400	3827900	6415900	5011300	4296700	3616300	6687500	4211800
A0A0R4J0B9	unreviewed	Pancreatic secretory granule membrane major glycoprotein GP2	Gp2	A0A0R4J0B9;A0A140LHP0;Q9D6X7;Q9D733;Q0VDQ3;Q9CV52;Q9CV56	A0A0R4J0B9;A0A140LHP0;Q9D6X7;Q9D733;Q0VDQ3	Mus musculus (Mouse)					tr|A0A0R4J0B9|A0A0R4J0B9_MOUSE Glycoprotein 2 (Zymogen granule membrane), isoform CRA_b OS=Mus musculus OX=10090 GN=Gp2 PE=1 SV=1;tr|A0A140LHP0|A0A140LHP0_MOUSE Pancreatic secretory granule membrane major glycoprotein GP2 OS=Mus musculus OX=10090 GN=Gp2 PE	13	13	13	31.6	31.6	31.6	59.569	534	0	323.31	By MS/MS	By MS/MS	By MS/MS	By MS/MS	By MS/MS	By MS/MS	By MS/MS	By MS/MS	By MS/MS	By MS/MS	By MS/MS	By MS/MS	By MS/MS	By MS/MS	By MS/MS	By MS/MS	By MS/MS	By MS/MS	By MS/MS	20638000000	37057000	35561000	81322000	87447000	117420000	61925000	129140000	140140000
A0A0R4J0X5	unreviewed	Alpha-1-antitrypsin 1-3	Serpina1c	A0A0R4J0X5;Q00896;A0A0A0MQA3;P07758	A0A0R4J0X5;Q00896;A0A0A0MQA3;P07758	Mus musculus (Mouse)		extracellular space [GO:0005615]		extracellular space [GO:0005615]	tr|A0A0R4J0X5|A0A0R4J0X5_MOUSE Alpha-1-antitrypsin 1-3 OS=Mus musculus OX=10090 GN=Serpina1c PE=1 SV=1;sp|Q00896|A1AT3_MOUSE Alpha-1-antitrypsin 1-3 OS=Mus musculus OX=10090 GN=Serpina1c PE=1 SV=2;tr|A0A0A0MQA3|A0A0A0MQA3_MOUSE Alpha-1-antitrypsin 1-1 OS=M	11	2	11	36.3	36.3	7.7	45.854	413	0	214.4	By MS/MS	By MS/MS	By MS/MS	By MS/MS	By MS/MS	By MS/MS	By MS/MS	By MS/MS	By MS/MS	By MS/MS	By MS/MS	By MS/MS	By MS/MS	By MS/MS	By MS/MS	By MS/MS	By MS/MS	By MS/MS	By MS/MS	4721900000	113320000	165930000	104070000	88108000	73481000	60781000	26410000	23151000
A0A0R4J107	unreviewed	Acyl-peptide hydrolase (EC 3.4.19.1) (Acylamino-acid-releasing enzyme) (Acylaminoacyl-peptidase) (Fragment)	Apeh	A0A0R4J107;Q8R146	A0A0R4J107;Q8R146	Mus musculus (Mouse)			serine-type endopeptidase activity [GO:0004252]	serine-type endopeptidase activity [GO:0004252]	tr|A0A0R4J107|A0A0R4J107_MOUSE Acylamino-acid-releasing enzyme (Fragment) OS=Mus musculus OX=10090 GN=Apeh PE=1 SV=1;sp|Q8R146|APEH_MOUSE Acylamino-acid-releasing enzyme OS=Mus musculus OX=10090 GN=Apeh PE=1 SV=3	1	1	1	1.5	1.5	1.5	79.704	716	0.00077414	3.196						By matching								By MS/MS	By MS/MS	By MS/MS				5292300	0	0	0	0	0	350270	0	0
A0A0R4J190	unreviewed	ADP-ribosyl cyclase/cyclic ADP-ribose hydrolase (EC 3.2.2.6)	Bst1	A0A0R4J190;Q64277;Q3TPZ1;A0A0G2JG11	A0A0R4J190;Q64277	Mus musculus (Mouse)	positive regulation of cell population proliferation [GO:0008284]; regulation of actin cytoskeleton organization [GO:0032956]; regulation of calcium-mediated signaling [GO:0050848]; regulation of cell-matrix adhesion [GO:0001952]; regulation of inflammatory response [GO:0050727]; regulation of neutrophil chemotaxis [GO:0090022]; regulation of peptidyl-tyrosine phosphorylation [GO:0050730]	extrinsic component of membrane [GO:0019898]; uropod [GO:0001931]	ADP-ribosyl cyclase activity [GO:0061811]; cyclic ADP-ribose hydrolase [GO:0061812]; NAD(P)+ nucleosidase activity [GO:0050135]; NAD+ nucleotidase, cyclic ADP-ribose generating [GO:0061809]; transferase activity [GO:0016740]	extrinsic component of membrane [GO:0019898]; uropod [GO:0001931]; ADP-ribosyl cyclase activity [GO:0061811]; cyclic ADP-ribose hydrolase [GO:0061812]; NAD(P)+ nucleosidase activity [GO:0050135]; NAD+ nucleotidase, cyclic ADP-ribose generating [GO:0061809]; transferase activity [GO:0016740]; positive regulation of cell population proliferation [GO:0008284]; regulation of actin cytoskeleton organi…	tr|A0A0R4J190|A0A0R4J190_MOUSE ADP-ribosyl cyclase/cyclic ADP-ribose hydrolase 2 OS=Mus musculus OX=10090 GN=Bst1 PE=1 SV=1;sp|Q64277|BST1_MOUSE ADP-ribosyl cyclase/cyclic ADP-ribose hydrolase 2 OS=Mus musculus OX=10090 GN=Bst1 PE=1 SV=1	11	11	11	46.9	46.9	46.9	34.561	311	0	264.28	By MS/MS	By MS/MS	By MS/MS	By MS/MS	By MS/MS	By MS/MS	By MS/MS	By MS/MS	By MS/MS	By MS/MS	By MS/MS	By MS/MS	By MS/MS	By MS/MS	By MS/MS	By MS/MS	By MS/MS	By MS/MS	By MS/MS	5486700000	45842000	42229000	32510000	39609000	71833000	37391000	8867100	18885000
A0A0R4J1V0	unreviewed	Na(+)/H(+) exchange regulatory cofactor NHE-RF3	Pdzk1	A0A0R4J1V0;Q9JIL4;D3Z114;D3YW13;D3YZS9	A0A0R4J1V0;Q9JIL4;D3Z114;D3YW13;D3YZS9	Mus musculus (Mouse)	carnitine transport [GO:0015879]; positive regulation of cation transmembrane transport [GO:1904064]; positive regulation of ion transmembrane transporter activity [GO:0032414]; positive regulation of protein localization to membrane [GO:1905477]	apical plasma membrane [GO:0016324]; brush border [GO:0005903]; membrane raft [GO:0045121]; microvillus membrane [GO:0031528]	PDZ domain binding [GO:0030165]; protein-containing complex binding [GO:0044877]; scavenger receptor binding [GO:0005124]	apical plasma membrane [GO:0016324]; brush border [GO:0005903]; membrane raft [GO:0045121]; microvillus membrane [GO:0031528]; PDZ domain binding [GO:0030165]; protein-containing complex binding [GO:0044877]; scavenger receptor binding [GO:0005124]; carnitine transport [GO:0015879]; positive regulation of cation transmembrane transport [GO:1904064]; positive regulation of ion transmembrane transp…	tr|A0A0R4J1V0|A0A0R4J1V0_MOUSE Na(+)/H(+) exchange regulatory cofactor NHE-RF3 OS=Mus musculus OX=10090 GN=Pdzk1 PE=1 SV=1;sp|Q9JIL4|NHRF3_MOUSE Na(+)/H(+) exchange regulatory cofactor NHE-RF3 OS=Mus musculus OX=10090 GN=Pdzk1 PE=1 SV=1;tr|D3Z114|D3Z114_MO	2	2	2	4.6	4.6	4.6	56.497	519	0.0092958	1.607	By matching		By MS/MS				By matching	By matching	By matching	By matching	By matching	By MS/MS	By matching	By MS/MS		By matching	By matching	By matching	By matching	47443000	1399500	0	1257500	0	0	0	4471500	4015500
A0A0U1RP93	unreviewed	Myosin regulatory light chain 2, skeletal muscle isoform	Mylpf	A0A0U1RP93;Q545G1;P97457;A0A0U1RQ36	A0A0U1RP93;Q545G1;P97457;A0A0U1RQ36	Mus musculus (Mouse)			calcium ion binding [GO:0005509]	calcium ion binding [GO:0005509]	tr|A0A0U1RP93|A0A0U1RP93_MOUSE Myosin regulatory light chain 2, skeletal muscle isoform OS=Mus musculus OX=10090 GN=Mylpf PE=1 SV=1;tr|Q545G1|Q545G1_MOUSE Uncharacterized protein OS=Mus musculus OX=10090 GN=Mylpf PE=1 SV=1;sp|P97457|MLRS_MOUSE Myosin regul	2	2	2	20.8	20.8	20.8	16.881	149	0.0036913	2.0676			By matching					By matching		By matching				By matching	By matching	By MS/MS	By MS/MS		By matching	25374000	0	0	440210	0	0	0	0	683900
A0A0U1RPF3	unreviewed	Calcium and integrin-binding protein 1	Cib1	A0A0U1RPF3;Q9Z0F4;D3YY46;Q8C2K4;A0A0U1RNH3	A0A0U1RPF3;Q9Z0F4;D3YY46;Q8C2K4	Mus musculus (Mouse)			calcium ion binding [GO:0005509]	calcium ion binding [GO:0005509]	tr|A0A0U1RPF3|A0A0U1RPF3_MOUSE Calcium and integrin binding 1 (Calmyrin), isoform CRA_a OS=Mus musculus OX=10090 GN=Cib1 PE=1 SV=1;sp|Q9Z0F4|CIB1_MOUSE Calcium and integrin-binding protein 1 OS=Mus musculus OX=10090 GN=Cib1 PE=1 SV=3;tr|D3YY46|D3YY46_MOUSE	4	4	4	30.1	30.1	30.1	21.206	186	0.00028225	9.0614	By MS/MS	By MS/MS	By MS/MS	By MS/MS	By MS/MS	By MS/MS	By MS/MS	By MS/MS	By matching	By MS/MS	By MS/MS	By MS/MS	By matching	By matching	By MS/MS	By matching	By matching	By matching	By matching	197860000	9020200	12828000	11641000	9630400	10565000	5812800	1299900	1195100
A0A0U5F0T2	unreviewed	Phosphoketolase (Phosphoketolase family protein) (Xylulose-5-phosphate phosphoketolase Fructose-6-phosphate phosphoketolase) (EC 4.1.2.22) (EC 4.1.2.9)	A4V07_06865 BBP13_03465 BFD03_03760 C6H63_02495 DKZ26_02880 DKZ35_07790 DL317_07360 FOD75_09635 GIX83_00920 LRLP16767_LR202_00285 LRLP16767_LR3C6_00156	A0A0U5F0T2	A0A0U5F0T2	Lactobacillus reuteri	carbohydrate metabolic process [GO:0005975]		fructose-6-phosphate phosphoketolase activity [GO:0047905]; phosphoketolase activity [GO:0050193]	fructose-6-phosphate phosphoketolase activity [GO:0047905]; phosphoketolase activity [GO:0050193]; carbohydrate metabolic process [GO:0005975]	tr|A0A0U5F0T2|A0A0U5F0T2_LACRE Phosphoketolase OS=Lactobacillus reuteri OX=1598 GN=A4V07_06865 PE=4 SV=1	34	34	34	58.2	58.2	58.2	91.373	803	0	323.31	By MS/MS	By MS/MS	By MS/MS	By MS/MS	By MS/MS	By matching	By matching	By matching	By matching		By matching	By matching	By matching		By matching	By matching		By matching	By matching	18307000000	21318000	30325000	16264000	19043000	17278000	4935700	10869000	2088800
A0A0W0C6G0	unreviewed	Isocitrate dehydrogenase [NAD] subunit, mitochondrial	IDH1 AO440_001595 GVI51_G02541	A0A0W0C6G0;Q6FTG5;A0A061AVI0	A0A0W0C6G0;Q6FTG5	Candida glabrata (Yeast) (Torulopsis glabrata)	tricarboxylic acid cycle [GO:0006099]	mitochondrion [GO:0005739]	isocitrate dehydrogenase (NAD+) activity [GO:0004449]; magnesium ion binding [GO:0000287]; NAD binding [GO:0051287]	mitochondrion [GO:0005739]; isocitrate dehydrogenase (NAD+) activity [GO:0004449]; magnesium ion binding [GO:0000287]; NAD binding [GO:0051287]; tricarboxylic acid cycle [GO:0006099]	tr|A0A0W0C6G0|A0A0W0C6G0_CANGB Isocitrate dehydrogenase [NAD] subunit, mitochondrial OS=Candida glabrata OX=5478 GN=AO440_001595 PE=3 SV=1;tr|Q6FTG5|Q6FTG5_CANGA Isocitrate dehydrogenase [NAD] subunit, mitochondrial OS=Candida glabrata (strain ATCC 2001 /	7	7	7	34.9	34.9	34.9	38.777	358	0	120.49	By matching	By matching	By matching	By matching	By matching	By matching	By matching	By matching		By matching							By MS/MS	By MS/MS	By MS/MS	843560000	7024800	3690000	5323500	4028900	4380700	2908400	4023500	3773500
A0A0W0C827	unreviewed	Centromere-binding protein 1	AO440_001978	A0A0W0C827;Q6FSB6;Q9C1R9	A0A0W0C827;Q6FSB6;Q9C1R9	Candida glabrata (Yeast) (Torulopsis glabrata)			protein dimerization activity [GO:0046983]	protein dimerization activity [GO:0046983]	tr|A0A0W0C827|A0A0W0C827_CANGB Centromere-binding protein 1 OS=Candida glabrata OX=5478 GN=AO440_001978 PE=4 SV=1;tr|Q6FSB6|Q6FSB6_CANGA Uncharacterized protein OS=Candida glabrata (strain ATCC 2001 / CBS 138 / JCM 3761 / NBRC 0622 / NRRL Y-65) OX=284593 G	11	11	11	32.5	32.5	32.5	51.741	443	0	24.624		By matching	By matching	By matching											By matching		By MS/MS	By MS/MS	By MS/MS	281560000	0	1109100	995420	757230	0	0	0	0
A0A0W0C9H1	unreviewed	40S ribosomal protein S7	AO440_001754 GVI51_G06325	A0A0W0C9H1;Q6FT00;A0A061B9Q9	A0A0W0C9H1;Q6FT00	Candida glabrata (Yeast) (Torulopsis glabrata)	translation [GO:0006412]	ribosome [GO:0005840]	structural constituent of ribosome [GO:0003735]	ribosome [GO:0005840]; structural constituent of ribosome [GO:0003735]; translation [GO:0006412]	tr|A0A0W0C9H1|A0A0W0C9H1_CANGB 40S ribosomal protein S7 OS=Candida glabrata OX=5478 GN=AO440_001754 PE=3 SV=1;tr|Q6FT00|Q6FT00_CANGA 40S ribosomal protein S7 OS=Candida glabrata (strain ATCC 2001 / CBS 138 / JCM 3761 / NBRC 0622 / NRRL Y-65) OX=284593 GN=C	7	7	7	50.5	50.5	50.5	21.544	188	0.00017437	16.795	By matching	By MS/MS	By matching		By matching		By matching	By matching	By matching	By matching	By matching		By matching	By matching	By matching		By MS/MS	By MS/MS	By MS/MS	2350600000	7668100	6802100	2712100	0	583050	0	12634000	1391300
A0A0W0C9M4	unreviewed	Glycerol-3-phosphate dehydrogenase [NAD(+)] (EC 1.1.1.8)	AO440_000580	A0A0W0C9M4;Q6FWJ7;A0A1V2LFV7	A0A0W0C9M4;Q6FWJ7	Candida glabrata (Yeast) (Torulopsis glabrata)	carbohydrate metabolic process [GO:0005975]; glycerol-3-phosphate catabolic process [GO:0046168]	glycerol-3-phosphate dehydrogenase complex [GO:0009331]	glycerol-3-phosphate dehydrogenase [NAD+] activity [GO:0004367]; NAD binding [GO:0051287]; protein homodimerization activity [GO:0042803]	glycerol-3-phosphate dehydrogenase complex [GO:0009331]; glycerol-3-phosphate dehydrogenase [NAD+] activity [GO:0004367]; NAD binding [GO:0051287]; protein homodimerization activity [GO:0042803]; carbohydrate metabolic process [GO:0005975]; glycerol-3-phosphate catabolic process [GO:0046168]	tr|A0A0W0C9M4|A0A0W0C9M4_CANGB Glycerol-3-phosphate dehydrogenase [NAD(+)] OS=Candida glabrata OX=5478 GN=AO440_000580 PE=3 SV=1;sp|Q6FWJ7|GPD2_CANGA Glycerol-3-phosphate dehydrogenase [NAD(+)] 2 OS=Candida glabrata (strain ATCC 2001 / CBS 138 / JCM 3761 /	17	13	17	67.5	67.5	50.7	41.917	381	0	323.31	By MS/MS	By MS/MS	By matching			By matching					By matching					By matching	By MS/MS	By MS/MS	By MS/MS	8961200000	4409200	3472700	2880100	0	0	612630	0	0
A0A0W0CAK8	unreviewed	CCT-beta	AO440_005174 AO440_005361 GVI51_L08217	A0A0W0CAK8;Q6FKV8;A0A061ATC1	A0A0W0CAK8;Q6FKV8	Candida glabrata (Yeast) (Torulopsis glabrata)	protein folding [GO:0006457]	chaperonin-containing T-complex [GO:0005832]	ATP binding [GO:0005524]; unfolded protein binding [GO:0051082]	chaperonin-containing T-complex [GO:0005832]; ATP binding [GO:0005524]; unfolded protein binding [GO:0051082]; protein folding [GO:0006457]	tr|A0A0W0CAK8|A0A0W0CAK8_CANGB T-complex protein 1 subunit beta OS=Candida glabrata OX=5478 GN=AO440_005174 PE=3 SV=1;tr|Q6FKV8|Q6FKV8_CANGA Uncharacterized protein OS=Candida glabrata (strain ATCC 2001 / CBS 138 / JCM 3761 / NBRC 0622 / NRRL Y-65) OX=2845	11	9	10	31.7	30	27.4	57.011	526	0	94.03			By matching				By matching				By matching						By matching	By MS/MS	By MS/MS	236270000	0	0	642730	0	0	0	504380	0
A0A0W0CAZ4	unreviewed	ATP-dependent RNA helicase SUB2	AO440_005117 AO440_005418	A0A0W0CAZ4;Q6FL17	A0A0W0CAZ4;Q6FL17	Candida glabrata (Yeast) (Torulopsis glabrata)			ATP binding [GO:0005524]; helicase activity [GO:0004386]; nucleic acid binding [GO:0003676]	ATP binding [GO:0005524]; helicase activity [GO:0004386]; nucleic acid binding [GO:0003676]	tr|A0A0W0CAZ4|A0A0W0CAZ4_CANGB ATP-dependent RNA helicase SUB2 OS=Candida glabrata OX=5478 GN=AO440_005117 PE=4 SV=1;sp|Q6FL17|SUB2_CANGA ATP-dependent RNA helicase SUB2 OS=Candida glabrata (strain ATCC 2001 / CBS 138 / JCM 3761 / NBRC 0622 / NRRL Y-65) OX	8	6	8	26.4	26.4	19.8	49.972	439	0	130.25	By matching	By matching	By matching			By matching											By matching	By MS/MS	By MS/MS	913350000	1505900	2491600	2185300	0	0	1806500	0	0
A0A0W0CB13	unreviewed	3-isopropylmalate dehydratase (EC 4.2.1.33) (Alpha-IPM isomerase) (Isopropylmalate isomerase)	AO440_000013 GVI51_A00231	A0A0W0CB13;Q6FXV1;A0A1V2L5M6	A0A0W0CB13;Q6FXV1	Candida glabrata (Yeast) (Torulopsis glabrata)	leucine biosynthetic process [GO:0009098]	3-isopropylmalate dehydratase complex [GO:0009316]	3-isopropylmalate dehydratase activity [GO:0003861]; 4 iron, 4 sulfur cluster binding [GO:0051539]; metal ion binding [GO:0046872]	3-isopropylmalate dehydratase complex [GO:0009316]; 3-isopropylmalate dehydratase activity [GO:0003861]; 4 iron, 4 sulfur cluster binding [GO:0051539]; metal ion binding [GO:0046872]; leucine biosynthetic process [GO:0009098]	tr|A0A0W0CB13|A0A0W0CB13_CANGB 3-isopropylmalate dehydratase OS=Candida glabrata OX=5478 GN=AO440_000013 PE=3 SV=1;tr|Q6FXV1|Q6FXV1_CANGA 3-isopropylmalate dehydratase OS=Candida glabrata (strain ATCC 2001 / CBS 138 / JCM 3761 / NBRC 0622 / NRRL Y-65) OX=2	9	7	9	18	18	14.4	86.522	784	0	56.402				By matching			By matching											By matching	By matching	321740000	0	0	0	1701500	0	0	440380	0
A0A0W0CBK7	unreviewed	Putative WD repeat-containing protein	AO440_002671	A0A0W0CBK7;Q6FQA5	A0A0W0CBK7;Q6FQA5	Candida glabrata (Yeast) (Torulopsis glabrata)					tr|A0A0W0CBK7|A0A0W0CBK7_CANGB Putative WD repeat-containing protein OS=Candida glabrata OX=5478 GN=AO440_002671 PE=4 SV=1;tr|Q6FQA5|Q6FQA5_CANGA Uncharacterized protein OS=Candida glabrata (strain ATCC 2001 / CBS 138 / JCM 3761 / NBRC 0622 / NRRL Y-65) OX	2	2	2	2.1	2.1	2.1	127.98	1131	0.0027306	2.1862									By matching		By matching	By matching								10382000	0	0	0	0	0	0	0	0
A0A0W0CC32	unreviewed	Deoxyhypusine hydroxylase (DOHH) (EC 1.14.99.29) (Deoxyhypusine dioxygenase) (Deoxyhypusine monooxygenase)	LIA1 AO440_001120 GVI51_F00275	A0A0W0CC32;Q6FUV3;A0A1V2L6Q6	A0A0W0CC32;Q6FUV3	Candida glabrata (Yeast) (Torulopsis glabrata)	peptidyl-lysine modification to peptidyl-hypusine [GO:0008612]	cytoplasm [GO:0005737]; nucleus [GO:0005634]	deoxyhypusine monooxygenase activity [GO:0019135]; metal ion binding [GO:0046872]	cytoplasm [GO:0005737]; nucleus [GO:0005634]; deoxyhypusine monooxygenase activity [GO:0019135]; metal ion binding [GO:0046872]; peptidyl-lysine modification to peptidyl-hypusine [GO:0008612]	tr|A0A0W0CC32|A0A0W0CC32_CANGB Deoxyhypusine hydroxylase OS=Candida glabrata OX=5478 GN=LIA1 PE=3 SV=1;sp|Q6FUV3|DOHH_CANGA Deoxyhypusine hydroxylase OS=Candida glabrata (strain ATCC 2001 / CBS 138 / JCM 3761 / NBRC 0622 / NRRL Y-65) OX=284593 GN=LIA1 PE=3	14	12	14	59	59	51.6	35.969	322	0	323.31							By matching			By matching				By matching			By MS/MS	By MS/MS	By MS/MS	2261100000	0	0	0	0	0	0	228630	0
A0A0W0CCJ3	unreviewed	NGG1-interacting factor 3	AO440_002634	A0A0W0CCJ3;Q6FQE2	A0A0W0CCJ3;Q6FQE2	Candida glabrata (Yeast) (Torulopsis glabrata)					tr|A0A0W0CCJ3|A0A0W0CCJ3_CANGB NGG1-interacting factor 3 OS=Candida glabrata OX=5478 GN=AO440_002634 PE=4 SV=1;tr|Q6FQE2|Q6FQE2_CANGA Uncharacterized protein OS=Candida glabrata (strain ATCC 2001 / CBS 138 / JCM 3761 / NBRC 0622 / NRRL Y-65) OX=284593 GN=C	4	4	4	21.1	21.1	21.1	32.423	294	0.00036232	5.8813																	By MS/MS	By MS/MS	By MS/MS	61543000	0	0	0	0	0	0	0	0
A0A0W0CCM7	unreviewed	Protein MMF1, mitochondrial	AO440_004386	A0A0W0CCM7;Q6FIR3	A0A0W0CCM7;Q6FIR3	Candida glabrata (Yeast) (Torulopsis glabrata)					tr|A0A0W0CCM7|A0A0W0CCM7_CANGB Protein MMF1, mitochondrial OS=Candida glabrata OX=5478 GN=AO440_004386 PE=4 SV=1;tr|Q6FIR3|Q6FIR3_CANGA Uncharacterized protein OS=Candida glabrata (strain ATCC 2001 / CBS 138 / JCM 3761 / NBRC 0622 / NRRL Y-65) OX=284593 GN	4	4	4	37.9	37.9	37.9	14.509	132	0	57.954	By matching		By matching														By matching	By matching	By MS/MS	1397900000	156570	0	469760	0	0	0	0	0
A0A0W0CCS4	unreviewed	Threonyl-tRNA synthetase (EC 6.1.1.3)	AO440_004410 GVI51_M12947	A0A0W0CCS4;Q6FIN6;A0A194S6U3	A0A0W0CCS4;Q6FIN6	Candida glabrata (Yeast) (Torulopsis glabrata)	threonyl-tRNA aminoacylation [GO:0006435]	cytoplasm [GO:0005737]	ATP binding [GO:0005524]; threonine-tRNA ligase activity [GO:0004829]	cytoplasm [GO:0005737]; ATP binding [GO:0005524]; threonine-tRNA ligase activity [GO:0004829]; threonyl-tRNA aminoacylation [GO:0006435]	tr|A0A0W0CCS4|A0A0W0CCS4_CANGB Threonine--tRNA ligase, cytoplasmic OS=Candida glabrata OX=5478 GN=AO440_004410 PE=3 SV=1;tr|Q6FIN6|Q6FIN6_CANGA Uncharacterized protein OS=Candida glabrata (strain ATCC 2001 / CBS 138 / JCM 3761 / NBRC 0622 / NRRL Y-65) OX=2	13	9	10	21.5	17.1	15.7	83.7	726	0	64.339						By matching							By matching		By matching		By MS/MS	By MS/MS	By MS/MS	437070000	0	0	0	0	0	979890	0	0
A0A0W0CCU5	unreviewed	Putative pyridoxal reductase	AO440_000812	A0A0W0CCU5;Q6FVX6	A0A0W0CCU5;Q6FVX6	Candida glabrata (Yeast) (Torulopsis glabrata)					tr|A0A0W0CCU5|A0A0W0CCU5_CANGB Putative pyridoxal reductase OS=Candida glabrata OX=5478 GN=AO440_000812 PE=4 SV=1;tr|Q6FVX6|Q6FVX6_CANGA Uncharacterized protein OS=Candida glabrata (strain ATCC 2001 / CBS 138 / JCM 3761 / NBRC 0622 / NRRL Y-65) OX=284593 G	13	12	13	48.9	48.9	46	39.194	352	0	112.22		By matching	By matching			By matching							By matching		By matching	By matching			By matching	1272500000	0	997190	863330	0	0	1587300	0	0
A0A0W0CEL2	unreviewed	Heat shock protein 42	AO440_004704	A0A0W0CEL2;A0A0W0CHC6;Q6FVM1	A0A0W0CEL2;A0A0W0CHC6;Q6FVM1	Candida glabrata (Yeast) (Torulopsis glabrata)					tr|A0A0W0CEL2|A0A0W0CEL2_CANGB Heat shock protein 42 OS=Candida glabrata OX=5478 GN=AO440_004704 PE=3 SV=1;tr|A0A0W0CHC6|A0A0W0CHC6_CANGB Heat shock protein 42 OS=Candida glabrata OX=5478 GN=AO440_000909 PE=3 SV=1;tr|Q6FVM1|Q6FVM1_CANGA Uncharacterized pro	4	4	4	20.1	20.1	20.1	35.829	319	0	294.34																	By matching	By matching	By MS/MS	332640000	0	0	0	0	0	0	0	0
A0A0W0CEP4	unreviewed	Mitochondrial 2-oxodicarboxylate carrier 2	AO440_004884 AO440_005340 GVI51_J03949	A0A0W0CEP4;Q6FPG0	A0A0W0CEP4;Q6FPG0	Candida glabrata (Yeast) (Torulopsis glabrata)	mitochondrial ADP transmembrane transport [GO:0140021]; mitochondrial ATP transmembrane transport [GO:1990544]	integral component of membrane [GO:0016021]; mitochondrial inner membrane [GO:0005743]	ATP:ADP antiporter activity [GO:0005471]	integral component of membrane [GO:0016021]; mitochondrial inner membrane [GO:0005743]; ATP:ADP antiporter activity [GO:0005471]; mitochondrial ADP transmembrane transport [GO:0140021]; mitochondrial ATP transmembrane transport [GO:1990544]	tr|A0A0W0CEP4|A0A0W0CEP4_CANGB Mitochondrial 2-oxodicarboxylate carrier 2 OS=Candida glabrata OX=5478 GN=AO440_004884 PE=3 SV=1;tr|Q6FPG0|Q6FPG0_CANGA Uncharacterized protein OS=Candida glabrata (strain ATCC 2001 / CBS 138 / JCM 3761 / NBRC 0622 / NRRL Y-6	1	1	1	5.6	5.6	5.6	33.157	302	0.0072268	1.737																	By MS/MS	By matching		76870000	0	0	0	0	0	0	0	0
A0A0W0CEU1	unreviewed	Leucyl-tRNA synthetase (EC 6.1.1.4)	AO440_002939	A0A0W0CEU1;Q6FPI1;A0A1V2L2L3	A0A0W0CEU1;Q6FPI1	Candida glabrata (Yeast) (Torulopsis glabrata)	leucyl-tRNA aminoacylation [GO:0006429]		aminoacyl-tRNA editing activity [GO:0002161]; ATP binding [GO:0005524]; leucine-tRNA ligase activity [GO:0004823]	aminoacyl-tRNA editing activity [GO:0002161]; ATP binding [GO:0005524]; leucine-tRNA ligase activity [GO:0004823]; leucyl-tRNA aminoacylation [GO:0006429]	tr|A0A0W0CEU1|A0A0W0CEU1_CANGB Leucine--tRNA ligase, cytoplasmic OS=Candida glabrata OX=5478 GN=AO440_002939 PE=4 SV=1;tr|Q6FPI1|Q6FPI1_CANGA Uncharacterized protein OS=Candida glabrata (strain ATCC 2001 / CBS 138 / JCM 3761 / NBRC 0622 / NRRL Y-65) OX=284	8	6	6	13.5	10.9	10.9	124.53	1093	0	220.55				By matching				By matching									By MS/MS	By MS/MS	By MS/MS	272080000	0	0	0	0	0	0	0	0
A0A0W0CG68	unreviewed	6-phosphogluconate dehydrogenase, decarboxylating (EC 1.1.1.44)	AO440_004425	A0A0W0CG68;Q6FIM1	A0A0W0CG68;Q6FIM1	Candida glabrata (Yeast) (Torulopsis glabrata)	D-gluconate metabolic process [GO:0019521]; pentose-phosphate shunt [GO:0006098]		NADP binding [GO:0050661]; phosphogluconate dehydrogenase (decarboxylating) activity [GO:0004616]	NADP binding [GO:0050661]; phosphogluconate dehydrogenase (decarboxylating) activity [GO:0004616]; D-gluconate metabolic process [GO:0019521]; pentose-phosphate shunt [GO:0006098]	tr|A0A0W0CG68|A0A0W0CG68_CANGB 6-phosphogluconate dehydrogenase, decarboxylating OS=Candida glabrata OX=5478 GN=AO440_004425 PE=3 SV=1;tr|Q6FIM1|Q6FIM1_CANGA 6-phosphogluconate dehydrogenase, decarboxylating OS=Candida glabrata (strain ATCC 2001 / CBS 138	21	16	21	59.3	59.3	47	53.499	489	0	323.31	By MS/MS	By MS/MS	By MS/MS	By matching	By MS/MS	By MS/MS	By matching	By matching	By matching	By matching	By matching	By matching			By matching		By MS/MS	By MS/MS	By MS/MS	22038000000	8718600	7663200	4323000	2289700	783120	0	1409200	1246200
A0A0W0CH30	unreviewed	Peptidyl-prolyl cis-trans isomerase (PPIase) (EC 5.2.1.8)	CPR1 AO440_000924 AO440_000947 GVI51_E00957	A0A0W0CH30;Q6FVK5;A0A061B8A5	A0A0W0CH30;Q6FVK5	Candida glabrata (Yeast) (Torulopsis glabrata)	protein folding [GO:0006457]		peptidyl-prolyl cis-trans isomerase activity [GO:0003755]	peptidyl-prolyl cis-trans isomerase activity [GO:0003755]; protein folding [GO:0006457]	tr|A0A0W0CH30|A0A0W0CH30_CANGB Peptidyl-prolyl cis-trans isomerase OS=Candida glabrata OX=5478 GN=AO440_000924 PE=3 SV=1;tr|Q6FVK5|Q6FVK5_CANGA Peptidyl-prolyl cis-trans isomerase OS=Candida glabrata (strain ATCC 2001 / CBS 138 / JCM 3761 / NBRC 0622 / NRR	9	8	9	77.2	77.2	58	17.391	162	0	323.31	By matching	By matching						By matching	By matching		By matching		By matching	By matching	By matching		By MS/MS	By MS/MS	By MS/MS	12520000000	611290	4315400	0	0	0	0	0	943580
A0A0W0CHN7	unreviewed	ATP synthase subunit beta (EC 7.1.2.2)	ATP2 AO440_001920 GVI51_H00319	A0A0W0CHN7;Q6FSH4;Q0ZIF0	A0A0W0CHN7;Q6FSH4;Q0ZIF0	Candida glabrata (Yeast) (Torulopsis glabrata)		proton-transporting ATP synthase complex, catalytic core F(1) [GO:0045261]	ATP binding [GO:0005524]; proton-transporting ATPase activity, rotational mechanism [GO:0046961]; proton-transporting ATP synthase activity, rotational mechanism [GO:0046933]	proton-transporting ATP synthase complex, catalytic core F(1) [GO:0045261]; ATP binding [GO:0005524]; proton-transporting ATP synthase activity, rotational mechanism [GO:0046933]; proton-transporting ATPase activity, rotational mechanism [GO:0046961]	tr|A0A0W0CHN7|A0A0W0CHN7_CANGB ATP synthase subunit beta OS=Candida glabrata OX=5478 GN=AO440_001920 PE=3 SV=1;tr|Q6FSH4|Q6FSH4_CANGA ATP synthase subunit beta OS=Candida glabrata (strain ATCC 2001 / CBS 138 / JCM 3761 / NBRC 0622 / NRRL Y-65) OX=284593 GN	24	8	11	71	34.3	27	54.208	507	0	165.9	By MS/MS	By MS/MS	By matching	By matching	By matching	By matching	By matching	By matching	By matching	By matching	By matching	By matching	By matching	By matching	By matching	By matching	By MS/MS	By MS/MS	By MS/MS	4575600000	11580000	13050000	996770	0	0	541260	0	0
A0A0W0CHU4	unreviewed	ATP synthase subunit f, mitochondrial	AO440_005496 AO440_005710	A0A0W0CHU4;Q6FY44	A0A0W0CHU4;Q6FY44	Candida glabrata (Yeast) (Torulopsis glabrata)	ATP synthesis coupled proton transport [GO:0015986]	mitochondrial proton-transporting ATP synthase complex, coupling factor F(o) [GO:0000276]		mitochondrial proton-transporting ATP synthase complex, coupling factor F(o) [GO:0000276]; ATP synthesis coupled proton transport [GO:0015986]	tr|A0A0W0CHU4|A0A0W0CHU4_CANGB ATP synthase subunit f, mitochondrial OS=Candida glabrata OX=5478 GN=AO440_005496 PE=4 SV=1;tr|Q6FY44|Q6FY44_CANGA Uncharacterized protein OS=Candida glabrata (strain ATCC 2001 / CBS 138 / JCM 3761 / NBRC 0622 / NRRL Y-65) OX	2	2	2	41.9	41.9	41.9	7.935	74	0.00033927	15.408																	By MS/MS	By matching	By MS/MS	111640000	0	0	0	0	0	0	0	0
A0A0W0CJ51	unreviewed	Phosphoglycerate mutase (EC 5.4.2.11)	GPM1 AO440_001097 GVI51_E06061	A0A0W0CJ51;Q6FUX8;A0A061BDU6	A0A0W0CJ51;Q6FUX8	Candida glabrata (Yeast) (Torulopsis glabrata)	glycolytic process [GO:0006096]		phosphoglycerate mutase activity [GO:0004619]	phosphoglycerate mutase activity [GO:0004619]; glycolytic process [GO:0006096]	tr|A0A0W0CJ51|A0A0W0CJ51_CANGB Phosphoglycerate mutase OS=Candida glabrata OX=5478 GN=AO440_001097 PE=3 SV=1;tr|Q6FUX8|Q6FUX8_CANGA Phosphoglycerate mutase OS=Candida glabrata (strain ATCC 2001 / CBS 138 / JCM 3761 / NBRC 0622 / NRRL Y-65) OX=284593 GN=GPM	16	13	16	68	68	57.1	27.59	247	0	323.31	By MS/MS	By MS/MS	By MS/MS	By matching	By matching		By matching	By matching	By matching	By matching	By matching	By matching	By matching	By matching	By matching		By MS/MS	By MS/MS	By MS/MS	27003000000	12881000	16883000	6968600	747670	726650	0	2402000	2394900
A0A0W0CJB0	unreviewed	Superoxide dismutase [Cu-Zn] (EC 1.15.1.1)	SOD1 AO440_000469 GVI51_C04477	A0A0W0CJB0;Q6FWL5;A0A061ATU6	A0A0W0CJB0;Q6FWL5	Candida glabrata (Yeast) (Torulopsis glabrata)			metal ion binding [GO:0046872]; superoxide dismutase activity [GO:0004784]	metal ion binding [GO:0046872]; superoxide dismutase activity [GO:0004784]	tr|A0A0W0CJB0|A0A0W0CJB0_CANGB Superoxide dismutase [Cu-Zn] OS=Candida glabrata OX=5478 GN=AO440_000469 PE=3 SV=1;sp|Q6FWL5|SODC_CANGA Superoxide dismutase [Cu-Zn] OS=Candida glabrata (strain ATCC 2001 / CBS 138 / JCM 3761 / NBRC 0622 / NRRL Y-65) OX=28459	6	6	6	55.8	55.8	55.8	15.749	154	0	35.722	By matching	By matching	By matching			By matching	By matching	By matching	By matching	By matching	By matching	By matching	By matching	By matching	By matching		By MS/MS	By MS/MS	By MS/MS	3377200000	4785800	4008400	7254300	0	0	1521900	4533400	4490700
A0A0W0CM33	unreviewed	Cytochrome b-c1 complex subunit 1, mitochondrial	AO440_001289	A0A0W0CM33;Q6FUC4	A0A0W0CM33;Q6FUC4	Candida glabrata (Yeast) (Torulopsis glabrata)			metal ion binding [GO:0046872]	metal ion binding [GO:0046872]	tr|A0A0W0CM33|A0A0W0CM33_CANGB Cytochrome b-c1 complex subunit 1, mitochondrial OS=Candida glabrata OX=5478 GN=AO440_001289 PE=4 SV=1;tr|Q6FUC4|Q6FUC4_CANGA Uncharacterized protein OS=Candida glabrata (strain ATCC 2001 / CBS 138 / JCM 3761 / NBRC 0622 / NR	5	5	5	17	17	17	49.733	453	0	71.408	By matching			By matching							By matching						By MS/MS	By MS/MS	By MS/MS	390590000	1057800	0	0	731440	0	0	0	0
A0A0W0CQQ2	unreviewed	Isocitrate dehydrogenase [NADP] (EC 1.1.1.42)	AO440_000640	A0A0W0CQQ2;Q6FWE7	A0A0W0CQQ2;Q6FWE7	Candida glabrata (Yeast) (Torulopsis glabrata)	isocitrate metabolic process [GO:0006102]; tricarboxylic acid cycle [GO:0006099]		isocitrate dehydrogenase (NADP+) activity [GO:0004450]; magnesium ion binding [GO:0000287]; NAD binding [GO:0051287]	isocitrate dehydrogenase (NADP+) activity [GO:0004450]; magnesium ion binding [GO:0000287]; NAD binding [GO:0051287]; isocitrate metabolic process [GO:0006102]; tricarboxylic acid cycle [GO:0006099]	tr|A0A0W0CQQ2|A0A0W0CQQ2_CANGB Isocitrate dehydrogenase [NADP] OS=Candida glabrata OX=5478 GN=AO440_000640 PE=3 SV=1;tr|Q6FWE7|Q6FWE7_CANGA Isocitrate dehydrogenase [NADP] OS=Candida glabrata (strain ATCC 2001 / CBS 138 / JCM 3761 / NBRC 0622 / NRRL Y-65)	10	7	7	28.8	21.3	21.3	47.345	423	0.00030189	10.998	By matching	By matching	By matching	By matching	By matching	By matching	By matching	By matching	By matching	By matching	By matching	By matching	By matching		By matching	By matching	By MS/MS	By MS/MS	By MS/MS	401090000	1089100	736270	0	0	0	0	732000	0
A0A0W0CR24	unreviewed	Succinate dehydrogenase [ubiquinone] flavoprotein subunit, mitochondrial (EC 1.3.5.1)	AO440_002829	A0A0W0CR24;Q6FPU5	A0A0W0CR24;Q6FPU5	Candida glabrata (Yeast) (Torulopsis glabrata)	electron transport chain [GO:0022900]; tricarboxylic acid cycle [GO:0006099]	mitochondrial inner membrane [GO:0005743]	flavin adenine dinucleotide binding [GO:0050660]; succinate dehydrogenase (ubiquinone) activity [GO:0008177]	mitochondrial inner membrane [GO:0005743]; flavin adenine dinucleotide binding [GO:0050660]; succinate dehydrogenase (ubiquinone) activity [GO:0008177]; electron transport chain [GO:0022900]; tricarboxylic acid cycle [GO:0006099]	tr|A0A0W0CR24|A0A0W0CR24_CANGB Succinate dehydrogenase [ubiquinone] flavoprotein subunit, mitochondrial OS=Candida glabrata OX=5478 GN=AO440_002829 PE=3 SV=1;tr|Q6FPU5|Q6FPU5_CANGA Succinate dehydrogenase [ubiquinone] flavoprotein subunit, mitochondrial OS	11	9	10	30.3	28.1	25.5	68.09	623	0	24.985	By matching	By matching	By matching	By matching	By matching	By matching	By matching		By matching	By matching	By matching			By matching	By matching	By matching	By MS/MS	By MS/MS	By MS/MS	543970000	2097400	0	560640	0	1179800	0	1397900	0
A0A0W0CRC0	unreviewed	Co-chaperone protein SBA1	AO440_003738	A0A0W0CRC0;Q6FM25	A0A0W0CRC0;Q6FM25	Candida glabrata (Yeast) (Torulopsis glabrata)					tr|A0A0W0CRC0|A0A0W0CRC0_CANGB Co-chaperone protein SBA1 OS=Candida glabrata OX=5478 GN=AO440_003738 PE=4 SV=1;tr|Q6FM25|Q6FM25_CANGA Uncharacterized protein OS=Candida glabrata (strain ATCC 2001 / CBS 138 / JCM 3761 / NBRC 0622 / NRRL Y-65) OX=284593 GN=C	5	5	5	29.2	29.2	29.2	23.022	209	0.0002805	8.8691								By matching						By matching			By matching	By MS/MS	By MS/MS	649820000	0	0	0	0	0	0	0	2298600
A0A0W0CSE5	unreviewed	Cytochrome b2, mitochondrial	AO440_003702	A0A0W0CSE5;Q6FM61	A0A0W0CSE5;Q6FM61	Candida glabrata (Yeast) (Torulopsis glabrata)			heme binding [GO:0020037]; metal ion binding [GO:0046872]; oxidoreductase activity [GO:0016491]	heme binding [GO:0020037]; metal ion binding [GO:0046872]; oxidoreductase activity [GO:0016491]	tr|A0A0W0CSE5|A0A0W0CSE5_CANGB Cytochrome b2, mitochondrial OS=Candida glabrata OX=5478 GN=AO440_003702 PE=3 SV=1;tr|Q6FM61|Q6FM61_CANGA Uncharacterized protein OS=Candida glabrata (strain ATCC 2001 / CBS 138 / JCM 3761 / NBRC 0622 / NRRL Y-65) OX=284593 G	3	3	3	7.5	7.5	7.5	59.209	533	0.00060624	3.5691																	By matching		By matching	8736400	0	0	0	0	0	0	0	0
A0A0W0CUP4	unreviewed	Citrate synthase	AO440_002064	A0A0W0CUP4;Q6FS26	A0A0W0CUP4;Q6FS26	Candida glabrata (Yeast) (Torulopsis glabrata)	citrate metabolic process [GO:0006101]		citrate (Si)-synthase activity [GO:0004108]	citrate (Si)-synthase activity [GO:0004108]; citrate metabolic process [GO:0006101]	tr|A0A0W0CUP4|A0A0W0CUP4_CANGB Citrate synthase OS=Candida glabrata OX=5478 GN=AO440_002064 PE=3 SV=1;tr|Q6FS26|Q6FS26_CANGA Citrate synthase OS=Candida glabrata (strain ATCC 2001 / CBS 138 / JCM 3761 / NBRC 0622 / NRRL Y-65) OX=284593 GN=CAGL0H03993g PE=3	5	5	5	14.2	14.2	14.2	50.611	452	0	306.17																	By MS/MS	By MS/MS	By MS/MS	674390000	0	0	0	0	0	0	0	0
A0A0W0CVG7	unreviewed	Aspartate aminotransferase (EC 2.6.1.1)	AO440_000688 GVI51_D01793	A0A0W0CVG7;Q6FW98;A0A061BB39	A0A0W0CVG7;Q6FW98	Candida glabrata (Yeast) (Torulopsis glabrata)	biosynthetic process [GO:0009058]; cellular amino acid metabolic process [GO:0006520]		L-aspartate:2-oxoglutarate aminotransferase activity [GO:0004069]; pyridoxal phosphate binding [GO:0030170]	L-aspartate:2-oxoglutarate aminotransferase activity [GO:0004069]; pyridoxal phosphate binding [GO:0030170]; biosynthetic process [GO:0009058]; cellular amino acid metabolic process [GO:0006520]	tr|A0A0W0CVG7|A0A0W0CVG7_CANGB Aspartate aminotransferase OS=Candida glabrata OX=5478 GN=AO440_000688 PE=4 SV=1;tr|Q6FW98|Q6FW98_CANGA Aspartate aminotransferase OS=Candida glabrata (strain ATCC 2001 / CBS 138 / JCM 3761 / NBRC 0622 / NRRL Y-65) OX=284593	11	10	11	44	44	41.9	45.636	418	0	63.404			By matching				By matching	By matching	By matching	By matching	By matching						By MS/MS	By matching	By MS/MS	296870000	0	0	836690	0	0	0	900850	742860
A0A0W0CVU6	unreviewed	SEC14 (SEC14 cytosolic factor)	SEC14 AO440_000795 GVI51_D04235	A0A0W0CVU6;P53989;A0A1V2LB98	A0A0W0CVU6;P53989	Candida glabrata (Yeast) (Torulopsis glabrata)					tr|A0A0W0CVU6|A0A0W0CVU6_CANGB SEC14 cytosolic factor OS=Candida glabrata OX=5478 GN=AO440_000795 PE=4 SV=1;sp|P53989|SEC14_CANGA SEC14 cytosolic factor OS=Candida glabrata (strain ATCC 2001 / CBS 138 / JCM 3761 / NBRC 0622 / NRRL Y-65) OX=284593 GN=SEC14	7	5	6	33.8	29.5	26.8	34.292	302	0	191.25										By matching							By MS/MS	By MS/MS	By MS/MS	272800000	0	0	0	0	0	0	0	0
A0A0W0CVV4	unreviewed	Mannose-1-phosphate guanyltransferase 1 (VIG9)	VIG9 CAGL0D01034g AO440_000650 GVI51_D00913	A0A0W0CVV4;Q9Y725	A0A0W0CVV4;Q9Y725	Candida glabrata (Yeast) (Torulopsis glabrata)	GDP-mannose biosynthetic process [GO:0009298]		mannose-1-phosphate guanylyltransferase activity [GO:0004475]	mannose-1-phosphate guanylyltransferase activity [GO:0004475]; GDP-mannose biosynthetic process [GO:0009298]	tr|A0A0W0CVV4|A0A0W0CVV4_CANGB Mannose-1-phosphate guanyltransferase 1 OS=Candida glabrata OX=5478 GN=VIG9 PE=4 SV=1;sp|Q9Y725|MPG11_CANGA Mannose-1-phosphate guanyltransferase 1 OS=Candida glabrata (strain ATCC 2001 / CBS 138 / JCM 3761 / NBRC 0622 / NRRL	7	5	6	31.9	26.6	21.6	39.359	361	0.00018783	20.048		By matching	By matching						By matching								By MS/MS	By MS/MS	By MS/MS	1133600000	0	899580	0	0	0	0	0	0
A0A0W0CW57	unreviewed	Superoxide dismutase (EC 1.15.1.1)	AO440_001003	A0A0W0CW57;Q6FV67;Q537W7	A0A0W0CW57;Q6FV67;Q537W7	Candida glabrata (Yeast) (Torulopsis glabrata)			metal ion binding [GO:0046872]; superoxide dismutase activity [GO:0004784]	metal ion binding [GO:0046872]; superoxide dismutase activity [GO:0004784]	tr|A0A0W0CW57|A0A0W0CW57_CANGB Superoxide dismutase OS=Candida glabrata OX=5478 GN=AO440_001003 PE=3 SV=1;tr|Q6FV67|Q6FV67_CANGA Superoxide dismutase OS=Candida glabrata (strain ATCC 2001 / CBS 138 / JCM 3761 / NBRC 0622 / NRRL Y-65) OX=284593 GN=CAGL0E043	3	3	3	16.1	16.1	16.1	26.58	236	0	35.107				By matching														By MS/MS	By matching	166470000	0	0	0	7585900	0	0	0	0
A0A0W0CWU1	unreviewed	Glutathione reductase (EC 1.8.1.7)	AO440_002135	A0A0W0CWU1;Q6FRV2	A0A0W0CWU1;Q6FRV2	Candida glabrata (Yeast) (Torulopsis glabrata)	cell redox homeostasis [GO:0045454]; glutathione metabolic process [GO:0006749]	cytoplasm [GO:0005737]	flavin adenine dinucleotide binding [GO:0050660]; glutathione-disulfide reductase activity [GO:0004362]; NADP binding [GO:0050661]	cytoplasm [GO:0005737]; flavin adenine dinucleotide binding [GO:0050660]; glutathione-disulfide reductase activity [GO:0004362]; NADP binding [GO:0050661]; cell redox homeostasis [GO:0045454]; glutathione metabolic process [GO:0006749]	tr|A0A0W0CWU1|A0A0W0CWU1_CANGB Glutathione reductase OS=Candida glabrata OX=5478 GN=AO440_002135 PE=3 SV=1;sp|Q6FRV2|GSHR_CANGA Glutathione reductase OS=Candida glabrata (strain ATCC 2001 / CBS 138 / JCM 3761 / NBRC 0622 / NRRL Y-65) OX=284593 GN=GLR1 PE=3	5	3	4	16.7	14.6	12	51.353	467	0.00027115	8.0308										By matching							By matching	By matching	By matching	144390000	0	0	0	0	0	0	0	0
A0A0W0CXV9	unreviewed	Eukaryotic translation initiation factor 3 subunit A (eIF3a) (Eukaryotic translation initiation factor 3 110 kDa subunit homolog) (eIF3 p110) (Translation initiation factor eIF3, p110 subunit homolog)	TIF32 AO440_003934	A0A0W0CXV9;Q6FK21;REV__B1AUD3;REV__A0A109FKF9;REV__Q8VBY2	A0A0W0CXV9;Q6FK21	Candida glabrata (Yeast) (Torulopsis glabrata)	formation of cytoplasmic translation initiation complex [GO:0001732]	eukaryotic 43S preinitiation complex [GO:0016282]; eukaryotic 48S preinitiation complex [GO:0033290]; eukaryotic translation initiation factor 3 complex [GO:0005852]	translation initiation factor activity [GO:0003743]	eukaryotic 43S preinitiation complex [GO:0016282]; eukaryotic 48S preinitiation complex [GO:0033290]; eukaryotic translation initiation factor 3 complex [GO:0005852]; translation initiation factor activity [GO:0003743]; formation of cytoplasmic translation initiation complex [GO:0001732]	tr|A0A0W0CXV9|A0A0W0CXV9_CANGB Eukaryotic translation initiation factor 3 subunit A OS=Candida glabrata OX=5478 GN=TIF32 PE=3 SV=1;sp|Q6FK21|EIF3A_CANGA Eukaryotic translation initiation factor 3 subunit A OS=Candida glabrata (strain ATCC 2001 / CBS 138 /	10	10	10	16.3	16.3	16.3	110.14	951	0	323.31	By matching																By MS/MS	By MS/MS	By MS/MS	352870000	1241100	0	0	0	0	0	0	0
A0A0W0CZ33	unreviewed	Cytochrome b5	AO440_004597 AO440_004989	A0A0W0CZ33;Q6FLF4	A0A0W0CZ33;Q6FLF4	Candida glabrata (Yeast) (Torulopsis glabrata)		integral component of membrane [GO:0016021]	heme binding [GO:0020037]; metal ion binding [GO:0046872]	integral component of membrane [GO:0016021]; heme binding [GO:0020037]; metal ion binding [GO:0046872]	tr|A0A0W0CZ33|A0A0W0CZ33_CANGB Cytochrome b5 OS=Candida glabrata OX=5478 GN=AO440_004597 PE=3 SV=1;tr|Q6FLF4|Q6FLF4_CANGA Uncharacterized protein OS=Candida glabrata (strain ATCC 2001 / CBS 138 / JCM 3761 / NBRC 0622 / NRRL Y-65) OX=284593 GN=CAGL0L03828g	5	5	5	57	57	57	13.36	121	0	139.75									By matching								By MS/MS	By MS/MS	By MS/MS	3025300000	0	0	0	0	0	0	0	0
A0A0W0CZ61	unreviewed	Lysine--tRNA ligase (EC 6.1.1.6) (Lysyl-tRNA synthetase)	KRS1 AO440_003756 GVI51_K11847	A0A0W0CZ61;Q6FM07;A0A061BCF4	A0A0W0CZ61;Q6FM07	Candida glabrata (Yeast) (Torulopsis glabrata)	lysyl-tRNA aminoacylation [GO:0006430]	cytoplasm [GO:0005737]	ATP binding [GO:0005524]; lysine-tRNA ligase activity [GO:0004824]; nucleic acid binding [GO:0003676]	cytoplasm [GO:0005737]; ATP binding [GO:0005524]; lysine-tRNA ligase activity [GO:0004824]; nucleic acid binding [GO:0003676]; lysyl-tRNA aminoacylation [GO:0006430]	tr|A0A0W0CZ61|A0A0W0CZ61_CANGB Lysine--tRNA ligase OS=Candida glabrata OX=5478 GN=AO440_003756 PE=3 SV=1;tr|Q6FM07|Q6FM07_CANGA Lysine--tRNA ligase OS=Candida glabrata (strain ATCC 2001 / CBS 138 / JCM 3761 / NBRC 0622 / NRRL Y-65) OX=284593 GN=KRS1 PE=3 S	10	8	8	28.4	23.7	23.7	67.987	591	0.00034194	15.807							By matching	By matching	By matching	By matching	By matching						By MS/MS	By MS/MS	By MS/MS	464860000	0	0	0	0	0	0	1002300	1274600
A0A0W0CZB0	unreviewed	Maintenance of telomere capping protein 1	AO440_004669 AO440_004917	A0A0W0CZB0;Q6FL79	A0A0W0CZB0;Q6FL79	Candida glabrata (Yeast) (Torulopsis glabrata)					tr|A0A0W0CZB0|A0A0W0CZB0_CANGB Maintenance of telomere capping protein 1 OS=Candida glabrata OX=5478 GN=AO440_004669 PE=4 SV=1;tr|Q6FL79|Q6FL79_CANGA Uncharacterized protein OS=Candida glabrata (strain ATCC 2001 / CBS 138 / JCM 3761 / NBRC 0622 / NRRL Y-65	11	11	11	31.4	31.4	31.4	49.472	442	0	242.43												By matching		By matching			By matching		By matching	856830000	0	0	0	0	0	0	0	0
A0A0W0D086	unreviewed	H(+)-transporting two-sector ATPase (EC 7.1.2.2)	AO440_002505	A0A0W0D086;Q6FQS3;Q874G7	A0A0W0D086;Q6FQS3;Q874G7	Candida glabrata (Yeast) (Torulopsis glabrata)	intein-mediated protein splicing [GO:0016539]		ATP binding [GO:0005524]; DNA binding [GO:0003677]; endonuclease activity [GO:0004519]; proton-transporting ATPase activity, rotational mechanism [GO:0046961]; proton-transporting ATP synthase activity, rotational mechanism [GO:0046933]	ATP binding [GO:0005524]; DNA binding [GO:0003677]; endonuclease activity [GO:0004519]; proton-transporting ATP synthase activity, rotational mechanism [GO:0046933]; proton-transporting ATPase activity, rotational mechanism [GO:0046961]; intein-mediated protein splicing [GO:0016539]	tr|A0A0W0D086|A0A0W0D086_CANGB V-type proton ATPase catalytic subunit A OS=Candida glabrata OX=5478 GN=AO440_002505 PE=4 SV=1;tr|Q6FQS3|Q6FQS3_CANGA Uncharacterized protein OS=Candida glabrata (strain ATCC 2001 / CBS 138 / JCM 3761 / NBRC 0622 / NRRL Y-65)	21	9	10	27.2	13.4	12.4	113.36	1033	0	45.237	By matching	By matching	By matching	By matching	By matching	By matching		By matching	By matching	By matching	By matching	By matching		By matching	By matching	By matching	By MS/MS	By MS/MS	By MS/MS	498830000	4837600	0	308060	8699900	0	7737700	0	0
A0A0W0D181	unreviewed	Transaldolase (EC 2.2.1.2)	TAL1 AO440_000292 GVI51_B02981	A0A0W0D181;Q6FXG5;A0A1C7HJ11	A0A0W0D181;Q6FXG5	Candida glabrata (Yeast) (Torulopsis glabrata)	carbohydrate metabolic process [GO:0005975]; pentose-phosphate shunt [GO:0006098]	cytoplasm [GO:0005737]	sedoheptulose-7-phosphate:D-glyceraldehyde-3-phosphate glyceronetransferase activity [GO:0004801]	cytoplasm [GO:0005737]; sedoheptulose-7-phosphate:D-glyceraldehyde-3-phosphate glyceronetransferase activity [GO:0004801]; carbohydrate metabolic process [GO:0005975]; pentose-phosphate shunt [GO:0006098]	tr|A0A0W0D181|A0A0W0D181_CANGB Transaldolase OS=Candida glabrata OX=5478 GN=AO440_000292 PE=3 SV=1;tr|Q6FXG5|Q6FXG5_CANGA Transaldolase OS=Candida glabrata (strain ATCC 2001 / CBS 138 / JCM 3761 / NBRC 0622 / NRRL Y-65) OX=284593 GN=TAL1 PE=3 SV=1	15	12	12	55.1	46.4	46.4	36.72	334	0	212.58	By MS/MS	By MS/MS	By MS/MS	By matching	By matching	By matching	By matching	By matching	By matching	By matching	By matching			By matching		By matching	By MS/MS	By MS/MS	By MS/MS	6282800000	4078300	4055900	2531800	0	736770	381360	5660700	4988700
A0A0W0D206	unreviewed	cAMP-dependent protein kinase regulatory subunit	AO440_002562	A0A0W0D206;Q6FQL6;A0A061B8S1	A0A0W0D206;Q6FQL6	Candida glabrata (Yeast) (Torulopsis glabrata)		cAMP-dependent protein kinase complex [GO:0005952]	cAMP binding [GO:0030552]; cAMP-dependent protein kinase regulator activity [GO:0008603]; kinase activity [GO:0016301]	cAMP-dependent protein kinase complex [GO:0005952]; cAMP binding [GO:0030552]; cAMP-dependent protein kinase regulator activity [GO:0008603]; kinase activity [GO:0016301]	tr|A0A0W0D206|A0A0W0D206_CANGB cAMP-dependent protein kinase regulatory subunit OS=Candida glabrata OX=5478 GN=AO440_002562 PE=3 SV=1;sp|Q6FQL6|KAPR_CANGA cAMP-dependent protein kinase regulatory subunit OS=Candida glabrata (strain ATCC 2001 / CBS 138 / JC	4	3	3	12.6	10.1	10.1	44.992	404	0.00042248	4.0495																		By matching	By MS/MS	143930000	0	0	0	0	0	0	0	0
A0A0W0D2G3	unreviewed	Mannose-6-phosphate isomerase (EC 5.3.1.8)	AO440_002881	A0A0W0D2G3;Q76IQ2;A0A1V2KYX2	A0A0W0D2G3;Q76IQ2	Candida glabrata (Yeast) (Torulopsis glabrata)	carbohydrate metabolic process [GO:0005975]; GDP-mannose biosynthetic process [GO:0009298]		mannose-6-phosphate isomerase activity [GO:0004476]; zinc ion binding [GO:0008270]	mannose-6-phosphate isomerase activity [GO:0004476]; zinc ion binding [GO:0008270]; carbohydrate metabolic process [GO:0005975]; GDP-mannose biosynthetic process [GO:0009298]	tr|A0A0W0D2G3|A0A0W0D2G3_CANGB Mannose-6-phosphate isomerase OS=Candida glabrata OX=5478 GN=AO440_002881 PE=3 SV=1;sp|Q76IQ2|MPI_CANGA Mannose-6-phosphate isomerase OS=Candida glabrata (strain ATCC 2001 / CBS 138 / JCM 3761 / NBRC 0622 / NRRL Y-65) OX=2845	7	6	6	23.8	21.4	21.4	47.588	429	0	33.305				By matching					By matching							By matching	By MS/MS	By MS/MS	By MS/MS	487220000	0	0	0	973810	0	0	0	0
A0A0W0D3W7	unreviewed	FPP:FPP farnesyltransferase (EC 2.5.1.21) (Farnesyl-diphosphate farnesyltransferase) (Squalene synthase)	ERG9 AO440_004159 GVI51_M07073	A0A0W0D3W7;Q9HGZ6;A0A109FJ71	A0A0W0D3W7;Q9HGZ6	Candida glabrata (Yeast) (Torulopsis glabrata)	sterol biosynthetic process [GO:0016126]	endoplasmic reticulum membrane [GO:0005789]; integral component of membrane [GO:0016021]	farnesyl-diphosphate farnesyltransferase activity [GO:0004310]; squalene synthase activity [GO:0051996]	endoplasmic reticulum membrane [GO:0005789]; integral component of membrane [GO:0016021]; farnesyl-diphosphate farnesyltransferase activity [GO:0004310]; squalene synthase activity [GO:0051996]; sterol biosynthetic process [GO:0016126]	tr|A0A0W0D3W7|A0A0W0D3W7_CANGB Squalene synthase OS=Candida glabrata OX=5478 GN=AO440_004159 PE=4 SV=1;sp|Q9HGZ6|FDFT_CANGA Squalene synthase OS=Candida glabrata (strain ATCC 2001 / CBS 138 / JCM 3761 / NBRC 0622 / NRRL Y-65) OX=284593 GN=ERG9 PE=3 SV=2	8	7	7	25.1	22.8	22.8	51.397	443	0.00030898	11.699	By matching	By matching	By matching	By matching	By matching										By matching		By matching	By MS/MS	By matching	247850000	3544300	1115100	1456600	1147000	1011500	0	0	0
A0A0W0D5E7	unreviewed	Uncharacterized protein	AO440_001713	A0A0W0D5E7;Q6FT42	A0A0W0D5E7;Q6FT42	Candida glabrata (Yeast) (Torulopsis glabrata)					tr|A0A0W0D5E7|A0A0W0D5E7_CANGB Uncharacterized protein OS=Candida glabrata OX=5478 GN=AO440_001713 PE=4 SV=1;tr|Q6FT42|Q6FT42_CANGA Uncharacterized protein OS=Candida glabrata (strain ATCC 2001 / CBS 138 / JCM 3761 / NBRC 0622 / NRRL Y-65) OX=284593 GN=CAG	12	12	12	25.4	25.4	25.4	88.344	807	0	66.635																By matching	By matching	By MS/MS	By MS/MS	291220000	0	0	0	0	0	0	0	0
A0A0W0D5W0	unreviewed	Valyl-tRNA synthetase (EC 6.1.1.9)	AO440_001612	A0A0W0D5W0;Q6FTE7	A0A0W0D5W0;Q6FTE7	Candida glabrata (Yeast) (Torulopsis glabrata)	valyl-tRNA aminoacylation [GO:0006438]		aminoacyl-tRNA editing activity [GO:0002161]; ATP binding [GO:0005524]; valine-tRNA ligase activity [GO:0004832]	aminoacyl-tRNA editing activity [GO:0002161]; ATP binding [GO:0005524]; valine-tRNA ligase activity [GO:0004832]; valyl-tRNA aminoacylation [GO:0006438]	tr|A0A0W0D5W0|A0A0W0D5W0_CANGB Valine--tRNA ligase, mitochondrial OS=Candida glabrata OX=5478 GN=AO440_001612 PE=3 SV=1;tr|Q6FTE7|Q6FTE7_CANGA Uncharacterized protein OS=Candida glabrata (strain ATCC 2001 / CBS 138 / JCM 3761 / NBRC 0622 / NRRL Y-65) OX=28	10	9	10	15.6	15.6	14.2	120.47	1061	0	138.69	By matching	By matching	By matching			By matching						By matching	By matching	By matching			By MS/MS	By matching	By MS/MS	336200000	1232000	2188000	682340	0	0	775720	0	0
A0A0W0D5W6	unreviewed	PIL1 (Sphingolipid long chain base-responsive protein PIL1)	PIL1 AO440_001605 GVI51_G02783	A0A0W0D5W6;Q6FTF4;A0A061BAX2	A0A0W0D5W6;Q6FTF4	Candida glabrata (Yeast) (Torulopsis glabrata)					tr|A0A0W0D5W6|A0A0W0D5W6_CANGB Sphingolipid long chain base-responsive protein PIL1 OS=Candida glabrata OX=5478 GN=AO440_001605 PE=4 SV=1;tr|Q6FTF4|Q6FTF4_CANGA Uncharacterized protein OS=Candida glabrata (strain ATCC 2001 / CBS 138 / JCM 3761 / NBRC 0622	14	9	11	58.8	50.2	41.5	35.15	311	0	323.31	By matching	By matching				By matching		By matching	By matching	By matching		By matching					By MS/MS	By MS/MS	By MS/MS	9559000000	0	0	0	0	0	0	0	870390
A0A0W0D770	unreviewed	40S ribosomal protein S13	AO440_001690	A0A0W0D770;Q6FT65;A0A1V2L8T3	A0A0W0D770;Q6FT65;A0A1V2L8T3	Candida glabrata (Yeast) (Torulopsis glabrata)	translation [GO:0006412]	ribosome [GO:0005840]	structural constituent of ribosome [GO:0003735]	ribosome [GO:0005840]; structural constituent of ribosome [GO:0003735]; translation [GO:0006412]	tr|A0A0W0D770|A0A0W0D770_CANGB 40S ribosomal protein S13 OS=Candida glabrata OX=5478 GN=AO440_001690 PE=3 SV=1;tr|Q6FT65|Q6FT65_CANGA Uncharacterized protein OS=Candida glabrata (strain ATCC 2001 / CBS 138 / JCM 3761 / NBRC 0622 / NRRL Y-65) OX=284593 GN=C	6	1	3	40.1	26.5	8.2	16.646	147	0.00036643	6.069						By matching	By matching	By matching	By matching	By matching		By matching		By matching			By MS/MS	By MS/MS	By MS/MS	1138900000	0	0	0	0	0	0	0	0
A0A0W0D7C1	unreviewed	ECM4 (Glutathione S-transferase omega-like 2)	ECM4 AO440_001570 GVI51_G01969	A0A0W0D7C1;Q6FTJ1;A0A1V2L525	A0A0W0D7C1;Q6FTJ1	Candida glabrata (Yeast) (Torulopsis glabrata)			glutathione transferase activity [GO:0004364]	glutathione transferase activity [GO:0004364]	tr|A0A0W0D7C1|A0A0W0D7C1_CANGB Glutathione S-transferase omega-like 2 OS=Candida glabrata OX=5478 GN=AO440_001570 PE=4 SV=1;tr|Q6FTJ1|Q6FTJ1_CANGA Uncharacterized protein OS=Candida glabrata (strain ATCC 2001 / CBS 138 / JCM 3761 / NBRC 0622 / NRRL Y-65) O	10	9	10	40.7	40.7	37.9	41.891	364	0	89.644		By matching	By matching								By matching	By matching	By matching	By matching			By MS/MS	By MS/MS	By MS/MS	770980000	0	3036800	2487400	0	0	0	0	0
A0A0W0D7S9	unreviewed	D-fructose-6-phosphate amidotransferase (EC 2.6.1.16) (Hexosephosphate aminotransferase)	AO440_003611 GVI51_K08415	A0A0W0D7S9;Q6FMF1;A0A061APR8	A0A0W0D7S9;Q6FMF1	Candida glabrata (Yeast) (Torulopsis glabrata)	glutamine metabolic process [GO:0006541]; UDP-N-acetylglucosamine biosynthetic process [GO:0006048]		carbohydrate derivative binding [GO:0097367]; glutamine-fructose-6-phosphate transaminase (isomerizing) activity [GO:0004360]	carbohydrate derivative binding [GO:0097367]; glutamine-fructose-6-phosphate transaminase (isomerizing) activity [GO:0004360]; glutamine metabolic process [GO:0006541]; UDP-N-acetylglucosamine biosynthetic process [GO:0006048]	tr|A0A0W0D7S9|A0A0W0D7S9_CANGB Glutamine--fructose-6-phosphate aminotransferase OS=Candida glabrata OX=5478 GN=AO440_003611 PE=4 SV=1;tr|Q6FMF1|Q6FMF1_CANGA Uncharacterized protein OS=Candida glabrata (strain ATCC 2001 / CBS 138 / JCM 3761 / NBRC 0622 / NR	3	2	2	6.6	3.7	3.7	80.65	723	0.0022956	2.4319																	By MS/MS		By matching	5151400	0	0	0	0	0	0	0	0
A0A0W0D805	unreviewed	1,4-alpha-glucan-branching enzyme (EC 2.4.1.18) (Glycogen-branching enzyme)	AO440_004002 GVI51_M03289	A0A0W0D805;Q6FJV0;A0A061AW19	A0A0W0D805;Q6FJV0	Candida glabrata (Yeast) (Torulopsis glabrata)	glycogen biosynthetic process [GO:0005978]		1,4-alpha-glucan branching enzyme activity [GO:0003844]; 1,4-alpha-glucan branching enzyme activity (using a glucosylated glycogenin as primer for glycogen synthesis) [GO:0102752]; cation binding [GO:0043169]; hydrolase activity, hydrolyzing O-glycosyl compounds [GO:0004553]	1,4-alpha-glucan branching enzyme activity [GO:0003844]; 1,4-alpha-glucan branching enzyme activity (using a glucosylated glycogenin as primer for glycogen synthesis) [GO:0102752]; cation binding [GO:0043169]; hydrolase activity, hydrolyzing O-glycosyl compounds [GO:0004553]; glycogen biosynthetic process [GO:0005978]	tr|A0A0W0D805|A0A0W0D805_CANGB 1,4-alpha-glucan-branching enzyme OS=Candida glabrata OX=5478 GN=AO440_004002 PE=4 SV=1;sp|Q6FJV0|GLGB_CANGA 1,4-alpha-glucan-branching enzyme OS=Candida glabrata (strain ATCC 2001 / CBS 138 / JCM 3761 / NBRC 0622 / NRRL Y-65	9	9	9	20.1	20.1	20.1	81.043	706	0	60.292																		By matching	By MS/MS	401430000	0	0	0	0	0	0	0	0
A0A0W0D813	unreviewed	60S ribosomal protein L33-B	AO440_003964 GVI51_M02387	A0A0W0D813;Q6FJZ0;A0A1V2L2S2	A0A0W0D813;Q6FJZ0;A0A1V2L2S2	Candida glabrata (Yeast) (Torulopsis glabrata)	translation [GO:0006412]	ribosome [GO:0005840]	structural constituent of ribosome [GO:0003735]	ribosome [GO:0005840]; structural constituent of ribosome [GO:0003735]; translation [GO:0006412]	tr|A0A0W0D813|A0A0W0D813_CANGB 60S ribosomal protein L33-B OS=Candida glabrata OX=5478 GN=AO440_003964 PE=3 SV=1;tr|Q6FJZ0|Q6FJZ0_CANGA Uncharacterized protein OS=Candida glabrata (strain ATCC 2001 / CBS 138 / JCM 3761 / NBRC 0622 / NRRL Y-65) OX=284593 GN	2	2	2	32.7	32.7	32.7	12.139	107	0.00026936	7.9047																	By MS/MS	By matching	By MS/MS	137680000	0	0	0	0	0	0	0	0
A0A0W0D8T7	unreviewed	Phosphoenolpyruvate carboxykinase (ATP) (EC 4.1.1.49)	AO440_002176 GVI51_H06501	A0A0W0D8T7;Q6FRR0;A0A1V2LGI9	A0A0W0D8T7;Q6FRR0	Candida glabrata (Yeast) (Torulopsis glabrata)	gluconeogenesis [GO:0006094]		ATP binding [GO:0005524]; kinase activity [GO:0016301]; phosphoenolpyruvate carboxykinase (ATP) activity [GO:0004612]	ATP binding [GO:0005524]; kinase activity [GO:0016301]; phosphoenolpyruvate carboxykinase (ATP) activity [GO:0004612]; gluconeogenesis [GO:0006094]	tr|A0A0W0D8T7|A0A0W0D8T7_CANGB Phosphoenolpyruvate carboxykinase OS=Candida glabrata OX=5478 GN=AO440_002176 PE=3 SV=1;sp|Q6FRR0|PCKA_CANGA Phosphoenolpyruvate carboxykinase (ATP) OS=Candida glabrata (strain ATCC 2001 / CBS 138 / JCM 3761 / NBRC 0622 / NRR	12	12	12	36.6	36.6	36.6	60.353	544	0	42.128			By matching	By matching			By matching	By matching	By matching		By matching			By matching	By matching		By MS/MS	By MS/MS	By MS/MS	2007300000	0	0	732340	1180900	0	0	7546900	4257000
A0A0W0DB44	unreviewed	Cysteine proteinase 1, mitochondrial (EC 3.4.22.40)	AO440_003090	A0A0W0DB44;Q6FP08	A0A0W0DB44;Q6FP08	Candida glabrata (Yeast) (Torulopsis glabrata)		mitochondrion [GO:0005739]	cysteine-type endopeptidase activity [GO:0004197]; DNA binding [GO:0003677]	mitochondrion [GO:0005739]; cysteine-type endopeptidase activity [GO:0004197]; DNA binding [GO:0003677]	tr|A0A0W0DB44|A0A0W0DB44_CANGB Cysteine proteinase 1, mitochondrial OS=Candida glabrata OX=5478 GN=AO440_003090 PE=4 SV=1;tr|Q6FP08|Q6FP08_CANGA Uncharacterized protein OS=Candida glabrata (strain ATCC 2001 / CBS 138 / JCM 3761 / NBRC 0622 / NRRL Y-65) OX=	3	3	3	9.8	9.8	9.8	52.14	451	0.00045336	4.9524															By matching		By MS/MS	By matching	By matching	73272000	0	0	0	0	0	0	0	0
A0A0W0DCC2	unreviewed	Nuclear cap-binding protein complex subunit 1	AO440_003412	A0A0W0DCC2;Q6FN07	A0A0W0DCC2;Q6FN07	Candida glabrata (Yeast) (Torulopsis glabrata)	mRNA cis splicing, via spliceosome [GO:0045292]; mRNA transport [GO:0051028]	nuclear cap binding complex [GO:0005846]; nucleus [GO:0005634]	RNA cap binding [GO:0000339]	nuclear cap binding complex [GO:0005846]; nucleus [GO:0005634]; RNA cap binding [GO:0000339]; mRNA cis splicing, via spliceosome [GO:0045292]; mRNA transport [GO:0051028]	tr|A0A0W0DCC2|A0A0W0DCC2_CANGB Nuclear cap-binding protein complex subunit 1 OS=Candida glabrata OX=5478 GN=AO440_003412 PE=4 SV=1;tr|Q6FN07|Q6FN07_CANGA Uncharacterized protein OS=Candida glabrata (strain ATCC 2001 / CBS 138 / JCM 3761 / NBRC 0622 / NRRL	5	5	5	9.7	9.7	9.7	99.557	858	0.00026483	7.5869			By matching														By matching		By matching	98035000	0	0	496270	0	0	0	0	0
A0A0W0DD31	unreviewed	Fatty acid synthase subunit beta (EC 2.3.1.86) [Includes: 3-hydroxyacyl-[acyl-carrier-protein] dehydratase (EC 4.2.1.59); Enoyl-[acyl-carrier-protein] reductase [NADH] (EC 1.3.1.9); [Acyl-carrier-protein] acetyltransferase (EC 2.3.1.38); [Acyl-carrier-protein] malonyltransferase (EC 2.3.1.39); S-acyl fatty acid synthase thioesterase (EC 3.1.2.14)]	AO440_000629	A0A0W0DD31;Q6FWF8	A0A0W0DD31;Q6FWF8	Candida glabrata (Yeast) (Torulopsis glabrata)	fatty acid biosynthetic process [GO:0006633]	fatty acid synthase complex [GO:0005835]	(3R)-hydroxymyristoyl-[acyl-carrier-protein] dehydratase activity [GO:0008659]; [acyl-carrier-protein] S-acetyltransferase activity [GO:0004313]; [acyl-carrier-protein] S-malonyltransferase activity [GO:0004314]; 3-hydroxydecanoyl-[acyl-carrier-protein] dehydratase activity [GO:0008693]; 3-hydroxyoctanoyl-[acyl-carrier-protein] dehydratase activity [GO:0047451]; 3-hydroxypalmitoyl-[acyl-carrier-p…	fatty acid synthase complex [GO:0005835]; (3R)-hydroxymyristoyl-[acyl-carrier-protein] dehydratase activity [GO:0008659]; 3-hydroxydecanoyl-[acyl-carrier-protein] dehydratase activity [GO:0008693]; 3-hydroxyoctanoyl-[acyl-carrier-protein] dehydratase activity [GO:0047451]; 3-hydroxypalmitoyl-[acyl-carrier-protein] dehydratase activity [GO:0004317]; [acyl-carrier-protein] S-acetyltransferase activ…	tr|A0A0W0DD31|A0A0W0DD31_CANGB Fatty acid synthase subunit beta OS=Candida glabrata OX=5478 GN=AO440_000629 PE=3 SV=1;tr|Q6FWF8|Q6FWF8_CANGA Fatty acid synthase subunit beta OS=Candida glabrata (strain ATCC 2001 / CBS 138 / JCM 3761 / NBRC 0622 / NRRL Y-65	60	54	54	40.5	37.8	37.8	233.65	2081	0	323.31			By matching				By matching	By matching	By matching	By matching	By matching	By matching	By matching	By matching	By matching	By matching	By MS/MS	By MS/MS	By matching	4505900000	0	0	806660	0	0	0	5091900	1226000
A0A0W0DDJ6	unreviewed	Altered inheritance of mitochondria protein 21	AO440_002870	A0A0W0DDJ6;Q6FPQ4	A0A0W0DDJ6;Q6FPQ4	Candida glabrata (Yeast) (Torulopsis glabrata)		actin cortical patch [GO:0030479]		actin cortical patch [GO:0030479]	tr|A0A0W0DDJ6|A0A0W0DDJ6_CANGB Altered inheritance of mitochondria protein 21 OS=Candida glabrata OX=5478 GN=AO440_002870 PE=4 SV=1;sp|Q6FPQ4|AIM21_CANGA Altered inheritance of mitochondria protein 21 OS=Candida glabrata (strain ATCC 2001 / CBS 138 / JCM 3	13	13	13	32.1	32.1	32.1	77.349	701	0	85.132							By matching	By matching	By matching	By matching		By matching	By matching						By matching	367030000	0	0	0	0	0	0	14854000	10297000
A0A0W0DEL6	unreviewed	Protein APA1	AO440_000196 AO440_005748	A0A0W0DEL6;Q6FX60	A0A0W0DEL6;Q6FX60	Candida glabrata (Yeast) (Torulopsis glabrata)	nucleotide metabolic process [GO:0009117]		ATP adenylyltransferase activity [GO:0003877]; ATP binding [GO:0005524]	ATP adenylyltransferase activity [GO:0003877]; ATP binding [GO:0005524]; nucleotide metabolic process [GO:0009117]	tr|A0A0W0DEL6|A0A0W0DEL6_CANGB Protein APA1 OS=Candida glabrata OX=5478 GN=AO440_000196 PE=4 SV=1;tr|Q6FX60|Q6FX60_CANGA Uncharacterized protein OS=Candida glabrata (strain ATCC 2001 / CBS 138 / JCM 3761 / NBRC 0622 / NRRL Y-65) OX=284593 GN=CAGL0B00550g P	2	2	2	13.8	13.8	13.8	36.267	318	0.00042758	4.1754											By matching	By matching								59896000	0	0	0	0	0	0	0	0
A0A0W0DEL7	unreviewed	Histone acetyltransferase type B subunit 2	AO440_000313	A0A0W0DEL7;Q6FXI8	A0A0W0DEL7;Q6FXI8	Candida glabrata (Yeast) (Torulopsis glabrata)		nucleus [GO:0005634]	transferase activity [GO:0016740]	nucleus [GO:0005634]; transferase activity [GO:0016740]	tr|A0A0W0DEL7|A0A0W0DEL7_CANGB Histone acetyltransferase type B subunit 2 OS=Candida glabrata OX=5478 GN=AO440_000313 PE=4 SV=1;sp|Q6FXI8|HAT2_CANGA Histone acetyltransferase type B subunit 2 OS=Candida glabrata (strain ATCC 2001 / CBS 138 / JCM 3761 / NBR	2	2	2	8.8	8.8	8.8	46.91	419	0.00025651	6.9489	By matching				By matching	By matching							By matching							105090000	1365200	0	0	0	20708000	15936000	0	0
A0A0W0DES0	unreviewed	Reticulon-like protein	AO440_000274	A0A0W0DES0;Q6FXE4	A0A0W0DES0;Q6FXE4	Candida glabrata (Yeast) (Torulopsis glabrata)		endoplasmic reticulum membrane [GO:0005789]; integral component of membrane [GO:0016021]		endoplasmic reticulum membrane [GO:0005789]; integral component of membrane [GO:0016021]	tr|A0A0W0DES0|A0A0W0DES0_CANGB Reticulon-like protein OS=Candida glabrata OX=5478 GN=AO440_000274 PE=4 SV=1;tr|Q6FXE4|Q6FXE4_CANGA Reticulon-like protein OS=Candida glabrata (strain ATCC 2001 / CBS 138 / JCM 3761 / NBRC 0622 / NRRL Y-65) OX=284593 GN=CAGL0	3	3	3	19	19	19	33.105	294	0	28.112																	By MS/MS	By MS/MS	By matching	178280000	0	0	0	0	0	0	0	0
A0A0W0DFA2	unreviewed	Guanine nucleotide-binding protein subunit beta-like protein	AO440_000698	A0A0W0DFA2;Q6FW89	A0A0W0DFA2;Q6FW89	Candida glabrata (Yeast) (Torulopsis glabrata)					tr|A0A0W0DFA2|A0A0W0DFA2_CANGB Guanine nucleotide-binding protein subunit beta-like protein OS=Candida glabrata OX=5478 GN=AO440_000698 PE=4 SV=1;tr|Q6FW89|Q6FW89_CANGA Uncharacterized protein OS=Candida glabrata (strain ATCC 2001 / CBS 138 / JCM 3761 / NB	9	9	9	45.8	45.8	45.8	33.388	310	0	323.31	By MS/MS	By MS/MS	By MS/MS								By matching	By matching		By matching			By MS/MS	By MS/MS	By MS/MS	1533200000	5431500	2329400	1947700	0	0	0	0	0
A0A0W0DH26	unreviewed	S-adenosylmethionine synthase (EC 2.5.1.6)	AO440_003128	A0A0W0DH26;Q6FNW9	A0A0W0DH26;Q6FNW9	Candida glabrata (Yeast) (Torulopsis glabrata)	one-carbon metabolic process [GO:0006730]; S-adenosylmethionine biosynthetic process [GO:0006556]		ATP binding [GO:0005524]; metal ion binding [GO:0046872]; methionine adenosyltransferase activity [GO:0004478]	ATP binding [GO:0005524]; metal ion binding [GO:0046872]; methionine adenosyltransferase activity [GO:0004478]; one-carbon metabolic process [GO:0006730]; S-adenosylmethionine biosynthetic process [GO:0006556]	tr|A0A0W0DH26|A0A0W0DH26_CANGB S-adenosylmethionine synthase OS=Candida glabrata OX=5478 GN=AO440_003128 PE=3 SV=1;tr|Q6FNW9|Q6FNW9_CANGA S-adenosylmethionine synthase OS=Candida glabrata (strain ATCC 2001 / CBS 138 / JCM 3761 / NBRC 0622 / NRRL Y-65) OX=2	13	9	9	56.4	43.1	43.1	42.305	383	0	30.951	By matching	By matching						By matching									By matching	By MS/MS	By matching	447480000	0	0	0	0	0	0	0	793530
A0A0W0DHK0	unreviewed	40S ribosomal protein S12	RPS12 AO440_003075 GVI51_J07095	A0A0W0DHK0;Q6FP23;A0A061BCU3	A0A0W0DHK0;Q6FP23	Candida glabrata (Yeast) (Torulopsis glabrata)	translation [GO:0006412]	ribosome [GO:0005840]	structural constituent of ribosome [GO:0003735]	ribosome [GO:0005840]; structural constituent of ribosome [GO:0003735]; translation [GO:0006412]	tr|A0A0W0DHK0|A0A0W0DHK0_CANGB 40S ribosomal protein S12 OS=Candida glabrata OX=5478 GN=AO440_003075 PE=3 SV=1;tr|Q6FP23|Q6FP23_CANGA 40S ribosomal protein S12 OS=Candida glabrata (strain ATCC 2001 / CBS 138 / JCM 3761 / NBRC 0622 / NRRL Y-65) OX=284593 GN	8	7	7	72.5	65.5	65.5	15.532	142	0	172.89			By matching									By matching		By matching			By MS/MS	By MS/MS	By MS/MS	7334200000	0	0	1906500	0	0	0	0	0
A0A0W0DI69	unreviewed	Glutaredoxin-2, mitochondrial	AO440_003501	A0A0W0DI69;B4UN35	A0A0W0DI69;B4UN35	Candida glabrata (Yeast) (Torulopsis glabrata)			electron transfer activity [GO:0009055]; protein disulfide oxidoreductase activity [GO:0015035]	electron transfer activity [GO:0009055]; protein disulfide oxidoreductase activity [GO:0015035]	tr|A0A0W0DI69|A0A0W0DI69_CANGB Glutaredoxin-2, mitochondrial OS=Candida glabrata OX=5478 GN=AO440_003501 PE=4 SV=1;tr|B4UN35|B4UN35_CANGA Uncharacterized protein OS=Candida glabrata (strain ATCC 2001 / CBS 138 / JCM 3761 / NBRC 0622 / NRRL Y-65) OX=284593	3	3	3	17.4	17.4	17.4	12.048	109	0.0003126	12.092																	By MS/MS	By matching	By matching	194190000	0	0	0	0	0	0	0	0
A0A0W0DIT8	unreviewed	Aspartic proteinase 3	AO440_005908	A0A0W0DIT8;Q6FVH5;A0A0W0DK58;Q6FVH7;A0A0W0DKY2;A0A0W0DK65	A0A0W0DIT8;Q6FVH5;A0A0W0DK58;Q6FVH7	Candida glabrata (Yeast) (Torulopsis glabrata)			aspartic-type endopeptidase activity [GO:0004190]	aspartic-type endopeptidase activity [GO:0004190]	tr|A0A0W0DIT8|A0A0W0DIT8_CANGB Aspartic proteinase 3 OS=Candida glabrata OX=5478 GN=AO440_005908 PE=3 SV=1;tr|Q6FVH5|Q6FVH5_CANGA Uncharacterized protein OS=Candida glabrata (strain ATCC 2001 / CBS 138 / JCM 3761 / NBRC 0622 / NRRL Y-65) OX=284593 GN=YPS9	6	6	6	5.7	5.7	5.7	212.17	1944	0	183.14																	By matching	By matching	By MS/MS	684510000	0	0	0	0	0	0	0	0
A0A0W0DK61	unreviewed	5-oxoprolinase	AO440_003259	A0A0W0DK61;Q6FNG0;A0A1V2L986	A0A0W0DK61;Q6FNG0;A0A1V2L986	Candida glabrata (Yeast) (Torulopsis glabrata)			hydrolase activity [GO:0016787]	hydrolase activity [GO:0016787]	tr|A0A0W0DK61|A0A0W0DK61_CANGB 5-oxoprolinase OS=Candida glabrata OX=5478 GN=AO440_003259 PE=4 SV=1;tr|Q6FNG0|Q6FNG0_CANGA Uncharacterized protein OS=Candida glabrata (strain ATCC 2001 / CBS 138 / JCM 3761 / NBRC 0622 / NRRL Y-65) OX=284593 GN=CAGL0K00231g	2	2	2	2.5	2.5	2.5	141.54	1280	0.0093009	1.6102				By matching	By matching															406350000	0	0	0	10544000	1418000	0	0	0
A0A0W0DKJ4	unreviewed	26S proteasome regulatory subunit RPN9	AO440_001231	A0A0W0DKJ4;Q6FUI8	A0A0W0DKJ4;Q6FUI8	Candida glabrata (Yeast) (Torulopsis glabrata)		proteasome complex [GO:0000502]		proteasome complex [GO:0000502]	tr|A0A0W0DKJ4|A0A0W0DKJ4_CANGB 26S proteasome regulatory subunit RPN9 OS=Candida glabrata OX=5478 GN=AO440_001231 PE=4 SV=1;tr|Q6FUI8|Q6FUI8_CANGA Uncharacterized protein OS=Candida glabrata (strain ATCC 2001 / CBS 138 / JCM 3761 / NBRC 0622 / NRRL Y-65) O	7	7	7	25.1	25.1	25.1	46.3	395	0.00029146	9.9438	By matching	By matching	By matching	By matching	By matching	By matching	By matching	By matching	By matching	By matching						By matching	By MS/MS			228660000	3386000	3805100	3594500	2763900	2239200	2600600	1890200	2685300
A0A0W0DKL4	unreviewed	Dihydrolipoyl dehydrogenase (EC 1.8.1.4)	AO440_001183	A0A0W0DKL4;Q6FUN7;A0A0K3CNA7	A0A0W0DKL4;Q6FUN7	Candida glabrata (Yeast) (Torulopsis glabrata)	cell redox homeostasis [GO:0045454]		dihydrolipoyl dehydrogenase activity [GO:0004148]; flavin adenine dinucleotide binding [GO:0050660]	dihydrolipoyl dehydrogenase activity [GO:0004148]; flavin adenine dinucleotide binding [GO:0050660]; cell redox homeostasis [GO:0045454]	tr|A0A0W0DKL4|A0A0W0DKL4_CANGB Dihydrolipoyl dehydrogenase OS=Candida glabrata OX=5478 GN=AO440_001183 PE=3 SV=1;tr|Q6FUN7|Q6FUN7_CANGA Dihydrolipoyl dehydrogenase OS=Candida glabrata (strain ATCC 2001 / CBS 138 / JCM 3761 / NBRC 0622 / NRRL Y-65) OX=28459	8	6	6	21.5	15.6	15.6	53.147	493	0	61.315	By matching	By matching	By matching	By matching	By matching	By matching	By matching				By matching	By matching	By matching				By MS/MS	By MS/MS	By MS/MS	322750000	5522900	6510800	4297000	1996000	3260900	1817100	1317000	0
A0A0W0DKM6	unreviewed	Actin-related protein 3	AO440_001125 GVI51_F00385	A0A0W0DKM6;Q6FUU8;A0A061AZ09	A0A0W0DKM6;Q6FUU8	Candida glabrata (Yeast) (Torulopsis glabrata)					tr|A0A0W0DKM6|A0A0W0DKM6_CANGB Actin-related protein 3 OS=Candida glabrata OX=5478 GN=AO440_001125 PE=3 SV=1;tr|Q6FUU8|Q6FUU8_CANGA Uncharacterized protein OS=Candida glabrata (strain ATCC 2001 / CBS 138 / JCM 3761 / NBRC 0622 / NRRL Y-65) OX=284593 GN=CAG	5	3	4	18.7	16.3	9.7	50.188	454	0.00017848	17.73														By matching	By matching		By matching	By matching	By MS/MS	239700000	0	0	0	0	0	0	0	0
A0A0W0DLC3	unreviewed	ATP-dependent RNA helicase DED1	AO440_004557 AO440_005859 GVI51_L02717	A0A0W0DLC3;Q8TFK8;O93932	A0A0W0DLC3;Q8TFK8	Candida glabrata (Yeast) (Torulopsis glabrata)			ATP binding [GO:0005524]; helicase activity [GO:0004386]; nucleic acid binding [GO:0003676]	ATP binding [GO:0005524]; helicase activity [GO:0004386]; nucleic acid binding [GO:0003676]	tr|A0A0W0DLC3|A0A0W0DLC3_CANGB ATP-dependent RNA helicase DED1 OS=Candida glabrata OX=5478 GN=AO440_004557 PE=3 SV=1;sp|Q8TFK8|DED1_CANGA ATP-dependent RNA helicase DED1 OS=Candida glabrata (strain ATCC 2001 / CBS 138 / JCM 3761 / NBRC 0622 / NRRL Y-65) OX	5	4	4	12.6	10.9	10.9	67.001	617	0.00017416	16.756		By matching	By matching	By matching	By matching		By matching		By matching								By matching	By MS/MS	By MS/MS	205650000	0	508660	0	0	0	0	153820	0
A0A0W0DN27	unreviewed	GCY1 (Glycerol 2-dehydrogenase (NADP(+)))	GCY1 AO440_002388 GVI51_I00913	A0A0W0DN27;Q6FR42;A0A061BDL8	A0A0W0DN27;Q6FR42	Candida glabrata (Yeast) (Torulopsis glabrata)			oxidoreductase activity [GO:0016491]	oxidoreductase activity [GO:0016491]	tr|A0A0W0DN27|A0A0W0DN27_CANGB Glycerol 2-dehydrogenase (NADP(+)) OS=Candida glabrata OX=5478 GN=AO440_002388 PE=4 SV=1;tr|Q6FR42|Q6FR42_CANGA Uncharacterized protein OS=Candida glabrata (strain ATCC 2001 / CBS 138 / JCM 3761 / NBRC 0622 / NRRL Y-65) OX=28	12	8	11	57.4	54.8	41.6	34.938	310	0	145.92							By matching	By matching	By matching	By matching	By matching	By matching	By matching	By matching			By MS/MS	By MS/MS	By matching	2198000000	0	0	0	0	0	0	0	931430
A0A0W0DWE6	unreviewed	Translation machinery-associated protein 20	AO440_002882 GVI51_J02123	A0A0W0DWE6;Q6FPP1;Q76IP4	A0A0W0DWE6;Q6FPP1;Q76IP4	Candida glabrata (Yeast) (Torulopsis glabrata)		cytoplasm [GO:0005737]	RNA binding [GO:0003723]	cytoplasm [GO:0005737]; RNA binding [GO:0003723]	tr|A0A0W0DWE6|A0A0W0DWE6_CANGB Translation machinery-associated protein 20 OS=Candida glabrata OX=5478 GN=AO440_002882 PE=3 SV=1;tr|Q6FPP1|Q6FPP1_CANGA Translation machinery-associated protein 20 OS=Candida glabrata (strain ATCC 2001 / CBS 138 / JCM 3761 /	2	2	2	15.6	15.6	15.6	20.157	180	0.0084884	1.6365																	By matching	By matching	By matching	38512000	0	0	0	0	0	0	0	0
A0A0W0DWM3	unreviewed	Phosphomannomutase (EC 5.4.2.8)	SEC53 AO440_003793 GVI51_K12683	A0A0W0DWM3;Q6FLW9;A0A061B1E8	A0A0W0DWM3;Q6FLW9	Candida glabrata (Yeast) (Torulopsis glabrata)	GDP-mannose biosynthetic process [GO:0009298]	cytoplasm [GO:0005737]	phosphomannomutase activity [GO:0004615]	cytoplasm [GO:0005737]; phosphomannomutase activity [GO:0004615]; GDP-mannose biosynthetic process [GO:0009298]	tr|A0A0W0DWM3|A0A0W0DWM3_CANGB Phosphomannomutase OS=Candida glabrata OX=5478 GN=AO440_003793 PE=3 SV=1;tr|Q6FLW9|Q6FLW9_CANGA Phosphomannomutase OS=Candida glabrata (strain ATCC 2001 / CBS 138 / JCM 3761 / NBRC 0622 / NRRL Y-65) OX=284593 GN=SEC53 PE=3 SV	8	8	8	46.3	46.3	46.3	29.15	255	0	36.669			By matching	By matching	By matching			By matching		By matching	By matching	By matching					By matching	By matching	By MS/MS	516430000	0	0	556730	859910	1564900	0	0	580660
A0A0W0DZ66	unreviewed	Lysophospholipase (EC 3.1.1.5)	AO440_004901 AO440_005535	A0A0W0DZ66;Q8TG07;Q8TG06	A0A0W0DZ66;Q8TG07	Candida glabrata (Yeast) (Torulopsis glabrata)	phospholipid catabolic process [GO:0009395]		lysophospholipase activity [GO:0004622]; phosphatidyl phospholipase B activity [GO:0102545]	lysophospholipase activity [GO:0004622]; phosphatidyl phospholipase B activity [GO:0102545]; phospholipid catabolic process [GO:0009395]	tr|A0A0W0DZ66|A0A0W0DZ66_CANGB Lysophospholipase OS=Candida glabrata OX=5478 GN=AO440_004901 PE=3 SV=1;sp|Q8TG07|PLB1_CANGA Lysophospholipase 1 OS=Candida glabrata (strain ATCC 2001 / CBS 138 / JCM 3761 / NBRC 0622 / NRRL Y-65) OX=284593 GN=PLB1 PE=3 SV=2	13	13	13	15.2	15.2	15.2	145.65	1349	0	295.81			By matching			By matching						By matching			By matching		By MS/MS	By MS/MS	By MS/MS	1414200000	0	0	521720	0	0	3936400	0	0
A0A0W0DZP5	unreviewed	PGM1 (Phosphoglucomutase 2)	PGM1 AO440_003568 GVI51_K07337	A0A0W0DZP5;Q6FMJ8;Q99JW6	A0A0W0DZP5;Q6FMJ8	Candida glabrata (Yeast) (Torulopsis glabrata)	carbohydrate metabolic process [GO:0005975]		intramolecular transferase activity, phosphotransferases [GO:0016868]; magnesium ion binding [GO:0000287]	intramolecular transferase activity, phosphotransferases [GO:0016868]; magnesium ion binding [GO:0000287]; carbohydrate metabolic process [GO:0005975]	tr|A0A0W0DZP5|A0A0W0DZP5_CANGB Phosphoglucomutase 2 OS=Candida glabrata OX=5478 GN=AO440_003568 PE=3 SV=1;tr|Q6FMJ8|Q6FMJ8_CANGA Uncharacterized protein OS=Candida glabrata (strain ATCC 2001 / CBS 138 / JCM 3761 / NBRC 0622 / NRRL Y-65) OX=284593 GN=PGM1 P	22	19	22	55.4	55.4	48	62.973	567	0	275.25	By MS/MS	By MS/MS	By MS/MS	By MS/MS	By matching	By matching	By MS/MS	By MS/MS	By MS/MS	By MS/MS	By MS/MS	By MS/MS	By MS/MS	By MS/MS	By MS/MS	By MS/MS	By MS/MS	By MS/MS	By MS/MS	2318900000	24391000	27298000	29347000	0	1379900	17971000	9275400	8047100
A0A0W0DZT6	unreviewed	Methionyl-tRNA synthetase (EC 6.1.1.10)	AO440_001456 GVI51_F08019	A0A0W0DZT6;Q6FTV8;A0A1V2L2U5	A0A0W0DZT6;Q6FTV8	Candida glabrata (Yeast) (Torulopsis glabrata)	methionyl-tRNA aminoacylation [GO:0006431]	cytoplasm [GO:0005737]	ATP binding [GO:0005524]; methionine-tRNA ligase activity [GO:0004825]	cytoplasm [GO:0005737]; ATP binding [GO:0005524]; methionine-tRNA ligase activity [GO:0004825]; methionyl-tRNA aminoacylation [GO:0006431]	tr|A0A0W0DZT6|A0A0W0DZT6_CANGB Methionine--tRNA ligase, cytoplasmic OS=Candida glabrata OX=5478 GN=AO440_001456 PE=3 SV=1;tr|Q6FTV8|Q6FTV8_CANGA Uncharacterized protein OS=Candida glabrata (strain ATCC 2001 / CBS 138 / JCM 3761 / NBRC 0622 / NRRL Y-65) OX=	4	3	3	7.5	5.5	5.5	85.253	750	0.00036505	5.9939												By matching						By matching	By matching	23774000	0	0	0	0	0	0	0	0
A0A0W0E039	unreviewed	Chorismate mutase (EC 5.4.99.5)	AO440_003766	A0A0W0E039;Q6FLZ7	A0A0W0E039;Q6FLZ7	Candida glabrata (Yeast) (Torulopsis glabrata)	aromatic amino acid family biosynthetic process [GO:0009073]; chorismate metabolic process [GO:0046417]		chorismate mutase activity [GO:0004106]	chorismate mutase activity [GO:0004106]; aromatic amino acid family biosynthetic process [GO:0009073]; chorismate metabolic process [GO:0046417]	tr|A0A0W0E039|A0A0W0E039_CANGB Chorismate mutase OS=Candida glabrata OX=5478 GN=AO440_003766 PE=4 SV=1;tr|Q6FLZ7|Q6FLZ7_CANGA Chorismate mutase OS=Candida glabrata (strain ATCC 2001 / CBS 138 / JCM 3761 / NBRC 0622 / NRRL Y-65) OX=284593 GN=CAGL0K12232g PE	3	3	3	20.8	20.8	20.8	30.153	260	0.00025582	6.8984	By matching	By matching		By matching	By matching															94465000	2527000	1845400	0	3033600	1135200	0	0	0
A0A0W0E0I5	unreviewed	ALD4 (Potassium-activated aldehyde dehydrogenase, mitochondrial)	ALD4 AO440_000884 GVI51_D06677	A0A0W0E0I5;Q6FVP8;A0A1V2L6T7	A0A0W0E0I5;Q6FVP8	Candida glabrata (Yeast) (Torulopsis glabrata)			oxidoreductase activity, acting on the aldehyde or oxo group of donors, NAD or NADP as acceptor [GO:0016620]	oxidoreductase activity, acting on the aldehyde or oxo group of donors, NAD or NADP as acceptor [GO:0016620]	tr|A0A0W0E0I5|A0A0W0E0I5_CANGB Potassium-activated aldehyde dehydrogenase, mitochondrial OS=Candida glabrata OX=5478 GN=AO440_000884 PE=3 SV=1;tr|Q6FVP8|Q6FVP8_CANGA Uncharacterized protein OS=Candida glabrata (strain ATCC 2001 / CBS 138 / JCM 3761 / NBRC	20	19	20	52.3	52.3	50.8	57.254	524	0	323.31	By matching	By MS/MS	By matching	By matching	By matching	By matching	By matching	By matching	By matching	By matching	By matching	By matching	By matching	By matching		By matching	By MS/MS	By MS/MS	By MS/MS	3138500000	244070000	145500000	122110000	123620000	117450000	114320000	3640300	7120900
A0A0W0E1P0	unreviewed	Ribonucleoside-diphosphate reductase small chain 1	AO440_000758 GVI51_D03377	A0A0W0E1P0;Q6FW29;A0A061AUK3	A0A0W0E1P0;Q6FW29	Candida glabrata (Yeast) (Torulopsis glabrata)	deoxyribonucleotide biosynthetic process [GO:0009263]		oxidoreductase activity [GO:0016491]	oxidoreductase activity [GO:0016491]; deoxyribonucleotide biosynthetic process [GO:0009263]	tr|A0A0W0E1P0|A0A0W0E1P0_CANGB Ribonucleoside-diphosphate reductase small chain 1 OS=Candida glabrata OX=5478 GN=AO440_000758 PE=4 SV=1;tr|Q6FW29|Q6FW29_CANGA Uncharacterized protein OS=Candida glabrata (strain ATCC 2001 / CBS 138 / JCM 3761 / NBRC 0622 /	9	6	6	27.8	18.2	18.2	45.852	400	0	36.593												By matching		By matching			By MS/MS	By MS/MS	By MS/MS	419780000	0	0	0	0	0	0	0	0
A0A0W0E1U3	unreviewed	[NU+] prion formation protein 1	AO440_000768	A0A0W0E1U3;Q6FW19;A0A061B2L8	A0A0W0E1U3;Q6FW19	Candida glabrata (Yeast) (Torulopsis glabrata)			ATPase activity [GO:0016887]; ATP binding [GO:0005524]	ATP binding [GO:0005524]; ATPase activity [GO:0016887]	tr|A0A0W0E1U3|A0A0W0E1U3_CANGB [NU+] prion formation protein 1 OS=Candida glabrata OX=5478 GN=AO440_000768 PE=4 SV=1;tr|Q6FW19|Q6FW19_CANGA Uncharacterized protein OS=Candida glabrata (strain ATCC 2001 / CBS 138 / JCM 3761 / NBRC 0622 / NRRL Y-65) OX=28459	7	7	7	10	10	10	132.66	1186	0.00030736	11.497																	By MS/MS	By matching		46017000	0	0	0	0	0	0	0	0
A0A0W0E2B9	unreviewed	Mitochondrial import inner membrane translocase TIM40 (Mitochondrial intermembrane space import and assembly protein 40)	AO440_000761	A0A0W0E2B9	A0A0W0E2B9	Candida glabrata (Yeast) (Torulopsis glabrata)	protein import into mitochondrial intermembrane space [GO:0045041]	integral component of membrane [GO:0016021]; mitochondrial inner membrane [GO:0005743]	protein disulfide oxidoreductase activity [GO:0015035]	integral component of membrane [GO:0016021]; mitochondrial inner membrane [GO:0005743]; protein disulfide oxidoreductase activity [GO:0015035]; protein import into mitochondrial intermembrane space [GO:0045041]	tr|A0A0W0E2B9|A0A0W0E2B9_CANGB Mitochondrial intermembrane space import and assembly protein 40 OS=Candida glabrata OX=5478 GN=AO440_000761 PE=4 SV=1	10	2	10	42.3	42.3	7.9	44.768	404	0	256.26																	By MS/MS	By MS/MS	By MS/MS	331110000	0	0	0	0	0	0	0	0
A0A0W0E336	unreviewed	60S ribosomal protein L36	AO440_003709	A0A0W0E336;B4UN40	A0A0W0E336;B4UN40	Candida glabrata (Yeast) (Torulopsis glabrata)	translation [GO:0006412]	ribosome [GO:0005840]	structural constituent of ribosome [GO:0003735]	ribosome [GO:0005840]; structural constituent of ribosome [GO:0003735]; translation [GO:0006412]	tr|A0A0W0E336|A0A0W0E336_CANGB 60S ribosomal protein L36 OS=Candida glabrata OX=5478 GN=AO440_003709 PE=3 SV=1;tr|B4UN40|B4UN40_CANGA 60S ribosomal protein L36 OS=Candida glabrata (strain ATCC 2001 / CBS 138 / JCM 3761 / NBRC 0622 / NRRL Y-65) OX=284593 GN	2	2	2	22.4	22.4	22.4	10.862	98	0.00031566	12.417									By matching								By MS/MS	By MS/MS	By MS/MS	531210000	0	0	0	0	0	0	0	0
A0A0W0E3C3	unreviewed	Mitochondrial outer membrane protein OM45	AO440_001299	A0A0W0E3C3;Q6FUB4	A0A0W0E3C3;Q6FUB4	Candida glabrata (Yeast) (Torulopsis glabrata)					tr|A0A0W0E3C3|A0A0W0E3C3_CANGB Mitochondrial outer membrane protein OM45 OS=Candida glabrata OX=5478 GN=AO440_001299 PE=4 SV=1;tr|Q6FUB4|Q6FUB4_CANGA Uncharacterized protein OS=Candida glabrata (strain ATCC 2001 / CBS 138 / JCM 3761 / NBRC 0622 / NRRL Y-65	8	8	8	25.1	25.1	25.1	48.738	423	0	26.448	By matching										By matching	By matching	By matching		By matching		By MS/MS	By matching		277500000	874040	0	0	0	0	0	0	0
A0A0W0E3X3	unreviewed	Nucleolar protein 56	AO440_000112	A0A0W0E3X3;Q6FY94	A0A0W0E3X3;Q6FY94	Candida glabrata (Yeast) (Torulopsis glabrata)	ribosome biogenesis [GO:0042254]	nucleolus [GO:0005730]		nucleolus [GO:0005730]; ribosome biogenesis [GO:0042254]	tr|A0A0W0E3X3|A0A0W0E3X3_CANGB Nucleolar protein 56 OS=Candida glabrata OX=5478 GN=AO440_000112 PE=4 SV=1;tr|Q6FY94|Q6FY94_CANGA Uncharacterized protein OS=Candida glabrata (strain ATCC 2001 / CBS 138 / JCM 3761 / NBRC 0622 / NRRL Y-65) OX=284593 GN=CAGL0A	9	5	6	30.5	22.6	18.9	57.093	508	0	124.03	By matching	By matching	By matching		By matching			By matching	By matching			By matching		By matching			By MS/MS	By MS/MS	By MS/MS	358490000	0	0	0	0	0	0	0	2320700
A0A0W0E5S2	unreviewed	Isocitrate lyase	AO440_002913 GVI51_J02871	A0A0W0E5S2;Q6FPK7;D1LER8	A0A0W0E5S2;Q6FPK7	Candida glabrata (Yeast) (Torulopsis glabrata)	carboxylic acid metabolic process [GO:0019752]		isocitrate lyase activity [GO:0004451]; metal ion binding [GO:0046872]; methylisocitrate lyase activity [GO:0046421]	isocitrate lyase activity [GO:0004451]; metal ion binding [GO:0046872]; methylisocitrate lyase activity [GO:0046421]; carboxylic acid metabolic process [GO:0019752]	tr|A0A0W0E5S2|A0A0W0E5S2_CANGB Isocitrate lyase OS=Candida glabrata OX=5478 GN=AO440_002913 PE=3 SV=1;sp|Q6FPK7|ACEA_CANGA Isocitrate lyase OS=Candida glabrata (strain ATCC 2001 / CBS 138 / JCM 3761 / NBRC 0622 / NRRL Y-65) OX=284593 GN=ICL1 PE=3 SV=2	6	6	6	21.2	21.2	21.2	62.177	553	0.00032082	13.031								By matching		By matching			By matching				By MS/MS	By matching	By matching	143100000	0	0	0	0	0	0	0	905480
A0A0W0E633	unreviewed	Sphingolipid long chain base-responsive protein PIL1	AO440_001553	A0A0W0E633;Q6FTK8	A0A0W0E633;Q6FTK8	Candida glabrata (Yeast) (Torulopsis glabrata)					tr|A0A0W0E633|A0A0W0E633_CANGB Sphingolipid long chain base-responsive protein PIL1 OS=Candida glabrata OX=5478 GN=AO440_001553 PE=4 SV=1;tr|Q6FTK8|Q6FTK8_CANGA Uncharacterized protein OS=Candida glabrata (strain ATCC 2001 / CBS 138 / JCM 3761 / NBRC 0622	9	9	9	51.3	51.3	51.3	35.07	310	0	323.31					By matching	By matching				By matching	By matching						By MS/MS	By MS/MS	By MS/MS	2299100000	0	0	0	0	845620	847900	0	0
A0A0W0E6T3	unreviewed	Mitochondrial protein import protein MAS5	AO440_003192	A0A0W0E6T3;Q6FNQ1	A0A0W0E6T3;Q6FNQ1	Candida glabrata (Yeast) (Torulopsis glabrata)	protein folding [GO:0006457]		unfolded protein binding [GO:0051082]	unfolded protein binding [GO:0051082]; protein folding [GO:0006457]	tr|A0A0W0E6T3|A0A0W0E6T3_CANGB Mitochondrial protein import protein MAS5 OS=Candida glabrata OX=5478 GN=AO440_003192 PE=4 SV=1;tr|Q6FNQ1|Q6FNQ1_CANGA Uncharacterized protein OS=Candida glabrata (strain ATCC 2001 / CBS 138 / JCM 3761 / NBRC 0622 / NRRL Y-65	3	3	3	17.8	17.8	17.8	27.875	258	0.00036364	5.9311							By matching	By matching	By matching								By MS/MS	By MS/MS	By MS/MS	138430000	0	0	0	0	0	0	3412300	4525200
A0A0W0E7M8	unreviewed	60S ribosomal protein L16-A (RPL16A)	RPL16A AO440_003200 GVI51_J09977	A0A0W0E7M8;Q6FNP2;A0A1V2LBI2	A0A0W0E7M8;Q6FNP2	Candida glabrata (Yeast) (Torulopsis glabrata)	translation [GO:0006412]	large ribosomal subunit [GO:0015934]	structural constituent of ribosome [GO:0003735]	large ribosomal subunit [GO:0015934]; structural constituent of ribosome [GO:0003735]; translation [GO:0006412]	tr|A0A0W0E7M8|A0A0W0E7M8_CANGB 60S ribosomal protein L16-A OS=Candida glabrata OX=5478 GN=AO440_003200 PE=3 SV=1;tr|Q6FNP2|Q6FNP2_CANGA Uncharacterized protein OS=Candida glabrata (strain ATCC 2001 / CBS 138 / JCM 3761 / NBRC 0622 / NRRL Y-65) OX=284593 GN	3	2	2	19	13.5	13.5	22.495	200	0	54.601										By matching						By matching	By MS/MS	By matching	By MS/MS	340600000	0	0	0	0	0	0	0	0
A0A0W0E9Q6	unreviewed	Isocitrate dehydrogenase [NAD] subunit, mitochondrial	AO440_002646	A0A0W0E9Q6;Q6FQD0;A0A1V2L3X2	A0A0W0E9Q6;Q6FQD0	Candida glabrata (Yeast) (Torulopsis glabrata)	tricarboxylic acid cycle [GO:0006099]	mitochondrion [GO:0005739]	isocitrate dehydrogenase (NAD+) activity [GO:0004449]; magnesium ion binding [GO:0000287]; NAD binding [GO:0051287]	mitochondrion [GO:0005739]; isocitrate dehydrogenase (NAD+) activity [GO:0004449]; magnesium ion binding [GO:0000287]; NAD binding [GO:0051287]; tricarboxylic acid cycle [GO:0006099]	tr|A0A0W0E9Q6|A0A0W0E9Q6_CANGB Isocitrate dehydrogenase [NAD] subunit, mitochondrial OS=Candida glabrata OX=5478 GN=AO440_002646 PE=3 SV=1;tr|Q6FQD0|Q6FQD0_CANGA Isocitrate dehydrogenase [NAD] subunit, mitochondrial OS=Candida glabrata (strain ATCC 2001 /	8	7	7	41.3	38.9	38.9	39.543	368	0	323.31			By matching														By MS/MS	By MS/MS	By MS/MS	535610000	0	0	899980	0	0	0	0	0
A0A0W0EBA6	unreviewed	GTP-binding protein YPT52	AO440_001800	A0A0W0EBA6;Q6FSU8	A0A0W0EBA6;Q6FSU8	Candida glabrata (Yeast) (Torulopsis glabrata)			GTPase activity [GO:0003924]; GTP binding [GO:0005525]	GTP binding [GO:0005525]; GTPase activity [GO:0003924]	tr|A0A0W0EBA6|A0A0W0EBA6_CANGB GTP-binding protein YPT52 OS=Candida glabrata OX=5478 GN=AO440_001800 PE=4 SV=1;tr|Q6FSU8|Q6FSU8_CANGA Uncharacterized protein OS=Candida glabrata (strain ATCC 2001 / CBS 138 / JCM 3761 / NBRC 0622 / NRRL Y-65) OX=284593 GN=C	5	5	5	34	34	34	23.846	215	0	193.2									By matching		By matching						By MS/MS		By matching	122110000	0	0	0	0	0	0	0	0
A0A0W0EBW4	unreviewed	Methylenetetrahydrofolate dehydrogenase [NAD(+)]	AO440_001574	A0A0W0EBW4;Q6FTI7	A0A0W0EBW4;Q6FTI7	Candida glabrata (Yeast) (Torulopsis glabrata)	one-carbon metabolic process [GO:0006730]		methylenetetrahydrofolate dehydrogenase (NADP+) activity [GO:0004488]	methylenetetrahydrofolate dehydrogenase (NADP+) activity [GO:0004488]; one-carbon metabolic process [GO:0006730]	tr|A0A0W0EBW4|A0A0W0EBW4_CANGB Methylenetetrahydrofolate dehydrogenase [NAD(+)] OS=Candida glabrata OX=5478 GN=AO440_001574 PE=4 SV=1;tr|Q6FTI7|Q6FTI7_CANGA Uncharacterized protein OS=Candida glabrata (strain ATCC 2001 / CBS 138 / JCM 3761 / NBRC 0622 / NR	3	3	3	9.9	9.9	9.9	36.7	323	0.00044853	4.7844																	By matching		By matching	132390000	0	0	0	0	0	0	0	0
A0A0W0EDF4	unreviewed	Small COPII coat GTPase SAR1 (Small COPII coat GTPase sar1)	AO440_001077	A0A0W0EDF4;Q6FUZ9	A0A0W0EDF4;Q6FUZ9	Candida glabrata (Yeast) (Torulopsis glabrata)	intracellular protein transport [GO:0006886]; vesicle-mediated transport [GO:0016192]	endoplasmic reticulum membrane [GO:0005789]; ER to Golgi transport vesicle membrane [GO:0012507]; Golgi membrane [GO:0000139]	GTP binding [GO:0005525]	endoplasmic reticulum membrane [GO:0005789]; ER to Golgi transport vesicle membrane [GO:0012507]; Golgi membrane [GO:0000139]; GTP binding [GO:0005525]; intracellular protein transport [GO:0006886]; vesicle-mediated transport [GO:0016192]	tr|A0A0W0EDF4|A0A0W0EDF4_CANGB Small COPII coat GTPase SAR1 OS=Candida glabrata OX=5478 GN=AO440_001077 PE=3 SV=1;sp|Q6FUZ9|SAR1_CANGA Small COPII coat GTPase SAR1 OS=Candida glabrata (strain ATCC 2001 / CBS 138 / JCM 3761 / NBRC 0622 / NRRL Y-65) OX=28459	8	7	8	62.8	62.8	56.8	20.639	183	0	57.752							By matching	By matching	By matching	By matching	By matching	By matching		By matching			By MS/MS	By MS/MS	By MS/MS	1372300000	0	0	0	0	0	0	2685300	2612000
A0A0W0EHL6	unreviewed	Elongation factor Tu	AO440_001878 GVI51_G09427	A0A0W0EHL6;Q6FSL8;Q0ZIB0	A0A0W0EHL6;Q6FSL8;Q0ZIB0	Candida glabrata (Yeast) (Torulopsis glabrata)			GTPase activity [GO:0003924]; GTP binding [GO:0005525]; translation elongation factor activity [GO:0003746]	GTP binding [GO:0005525]; GTPase activity [GO:0003924]; translation elongation factor activity [GO:0003746]	tr|A0A0W0EHL6|A0A0W0EHL6_CANGB Elongation factor Tu OS=Candida glabrata OX=5478 GN=AO440_001878 PE=3 SV=1;tr|Q6FSL8|Q6FSL8_CANGA Elongation factor Tu OS=Candida glabrata (strain ATCC 2001 / CBS 138 / JCM 3761 / NBRC 0622 / NRRL Y-65) OX=284593 GN=CAGL0G095	11	4	5	35.4	20.4	16.9	47.614	432	0.00032605	13.564	By matching	By matching	By matching	By matching	By matching		By matching	By matching		By matching	By matching	By matching	By matching			By matching	By MS/MS	By MS/MS	By matching	65127000	0	0	0	0	0	0	0	0
A0A0W0EIQ8	unreviewed	Peroxidase (EC 1.11.1.-)	AO440_003596	A0A0W0EIQ8;Q6FMG7	A0A0W0EIQ8;Q6FMG7	Candida glabrata (Yeast) (Torulopsis glabrata)	response to oxidative stress [GO:0006979]		heme binding [GO:0020037]; metal ion binding [GO:0046872]; peroxidase activity [GO:0004601]	heme binding [GO:0020037]; metal ion binding [GO:0046872]; peroxidase activity [GO:0004601]; response to oxidative stress [GO:0006979]	tr|A0A0W0EIQ8|A0A0W0EIQ8_CANGB Peroxidase OS=Candida glabrata OX=5478 GN=AO440_003596 PE=3 SV=1;sp|Q6FMG7|CCPR_CANGA Cytochrome c peroxidase, mitochondrial OS=Candida glabrata (strain ATCC 2001 / CBS 138 / JCM 3761 / NBRC 0622 / NRRL Y-65) OX=284593 GN=CAG	8	8	8	35.6	35.6	35.6	30.39	267	0	41.286																	By MS/MS	By MS/MS	By MS/MS	381650000	0	0	0	0	0	0	0	0
A0A0W0EM76	unreviewed	60S ribosomal protein L3	AO440_001569 GVI51_G01947	A0A0W0EM76;Q6FTJ2;A0A061AI72	A0A0W0EM76;Q6FTJ2	Candida glabrata (Yeast) (Torulopsis glabrata)	translation [GO:0006412]	ribosome [GO:0005840]	structural constituent of ribosome [GO:0003735]	ribosome [GO:0005840]; structural constituent of ribosome [GO:0003735]; translation [GO:0006412]	tr|A0A0W0EM76|A0A0W0EM76_CANGB 60S ribosomal protein L3 OS=Candida glabrata OX=5478 GN=AO440_001569 PE=3 SV=1;sp|Q6FTJ2|RL3_CANGA 60S ribosomal protein L3 OS=Candida glabrata (strain ATCC 2001 / CBS 138 / JCM 3761 / NBRC 0622 / NRRL Y-65) OX=284593 GN=RPL3	7	4	5	23.5	16	12.1	43.841	387	0	169.24		By matching															By MS/MS	By MS/MS	By MS/MS	824390000	0	602380	0	0	0	0	0	0
A0A0W0EN54	unreviewed	Malate synthase (EC 2.3.3.9)	AO440_004603 AO440_004983 GVI51_L03795	A0A0W0EN54;Q6FLE7;A0A061AR75	A0A0W0EN54;Q6FLE7	Candida glabrata (Yeast) (Torulopsis glabrata)	glyoxylate cycle [GO:0006097]; tricarboxylic acid cycle [GO:0006099]		malate synthase activity [GO:0004474]	malate synthase activity [GO:0004474]; glyoxylate cycle [GO:0006097]; tricarboxylic acid cycle [GO:0006099]	tr|A0A0W0EN54|A0A0W0EN54_CANGB Malate synthase OS=Candida glabrata OX=5478 GN=AO440_004603 PE=3 SV=1;tr|Q6FLE7|Q6FLE7_CANGA Malate synthase OS=Candida glabrata (strain ATCC 2001 / CBS 138 / JCM 3761 / NBRC 0622 / NRRL Y-65) OX=284593 GN=CAGL0L03982g PE=3 S	3	3	3	8.7	8.7	8.7	63.201	554	0.00019708	22.99																	By MS/MS	By matching		96409000	0	0	0	0	0	0	0	0
A0A0W0ERK5	unreviewed	S-adenosylmethionine synthase (EC 2.5.1.6)	AO440_000168	A0A0W0ERK5;Q6FX78;A0A0W0C7T2	A0A0W0ERK5;Q6FX78;A0A0W0C7T2	Candida glabrata (Yeast) (Torulopsis glabrata)	one-carbon metabolic process [GO:0006730]; S-adenosylmethionine biosynthetic process [GO:0006556]		ATP binding [GO:0005524]; metal ion binding [GO:0046872]; methionine adenosyltransferase activity [GO:0004478]	ATP binding [GO:0005524]; metal ion binding [GO:0046872]; methionine adenosyltransferase activity [GO:0004478]; one-carbon metabolic process [GO:0006730]; S-adenosylmethionine biosynthetic process [GO:0006556]	tr|A0A0W0ERK5|A0A0W0ERK5_CANGB S-adenosylmethionine synthase OS=Candida glabrata OX=5478 GN=AO440_000168 PE=3 SV=1;tr|Q6FX78|Q6FX78_CANGA S-adenosylmethionine synthase OS=Candida glabrata (strain ATCC 2001 / CBS 138 / JCM 3761 / NBRC 0622 / NRRL Y-65) OX=2	11	8	8	48.7	39.3	39.3	41.753	382	0	42.106	By matching	By matching															By MS/MS	By matching	By matching	388590000	0	0	0	0	0	0	0	0
A0A109FAT4	unreviewed	Malate dehydrogenase (EC 1.1.1.37)	RHOSPDRAFT_23672	A0A109FAT4;A0A2S5B497;M7WQ86;CDR48599.1;A0A061BGY4;A0A2S9ZZA5	A0A109FAT4	Rhodotorula sp. JG-1b	carbohydrate metabolic process [GO:0005975]; carboxylic acid metabolic process [GO:0019752]; tricarboxylic acid cycle [GO:0006099]		L-malate dehydrogenase activity [GO:0030060]	L-malate dehydrogenase activity [GO:0030060]; carbohydrate metabolic process [GO:0005975]; carboxylic acid metabolic process [GO:0019752]; tricarboxylic acid cycle [GO:0006099]	tr|A0A109FAT4|A0A109FAT4_9BASI Malate dehydrogenase, NAD-dependent OS=Rhodotorula sp. JG-1b OX=1305733 GN=RHOSPDRAFT_23672 PE=3 SV=1	5	5	5	22	22	22	34.947	336	0.00028852	9.7123	By matching	By MS/MS	By matching	By MS/MS	By MS/MS	By MS/MS	By MS/MS	By MS/MS	By MS/MS	By MS/MS	By matching	By matching	By matching		By matching	By MS/MS	By matching			560130000	16312000	19531000	10788000	10366000	10415000	9203100	7669100	6322100
A0A109FBM9	unreviewed	Phosphoglycerate kinase (EC 2.7.2.3)	RHOSPDRAFT_23300	A0A109FBM9;A0A2S5BJD9;A0A194S6Q4	A0A109FBM9;A0A2S5BJD9	Rhodotorula sp. JG-1b	glycolytic process [GO:0006096]		ATP binding [GO:0005524]; phosphoglycerate kinase activity [GO:0004618]	ATP binding [GO:0005524]; phosphoglycerate kinase activity [GO:0004618]; glycolytic process [GO:0006096]	tr|A0A109FBM9|A0A109FBM9_9BASI Phosphoglycerate kinase OS=Rhodotorula sp. JG-1b OX=1305733 GN=RHOSPDRAFT_23300 PE=3 SV=1;tr|A0A2S5BJD9|A0A2S5BJD9_9BASI Phosphoglycerate kinase OS=Rhodotorula taiwanensis OX=741276 GN=BMF94_0135 PE=3 SV=1	13	8	11	46.1	39.4	30.6	45.154	421	0	30.355	By matching	By MS/MS	By matching	By matching	By matching	By matching	By matching	By matching	By matching	By matching	By matching	By matching		By matching	By MS/MS	By MS/MS	By matching	By matching	By matching	601110000	4221500	7305000	4911500	3342500	1461000	2458300	1987200	4533100
A0A109FCD4	unreviewed	Uncharacterized protein	RHOSPDRAFT_36579	A0A109FCD4	A0A109FCD4	Rhodotorula sp. JG-1b					tr|A0A109FCD4|A0A109FCD4_9BASI Uncharacterized protein OS=Rhodotorula sp. JG-1b OX=1305733 GN=RHOSPDRAFT_36579 PE=4 SV=1	2	2	2	36.5	36.5	36.5	10.513	104	0.00033328	14.451					By matching	By matching					By matching	By matching								26805000	0	0	0	0	884270	1594600	0	0
A0A109FCW9	unreviewed	Phosphoglycerate mutase	RHOSPDRAFT_30190	A0A109FCW9;A0A2S5AZJ1;A0A0P9EX27;A0A2T0A1D2;A0A0K3CRQ8;A0A061B934;M7XRQ3	A0A109FCW9;A0A2S5AZJ1	Rhodotorula sp. JG-1b	glycolytic process [GO:0006096]		phosphoglycerate mutase activity [GO:0004619]	phosphoglycerate mutase activity [GO:0004619]; glycolytic process [GO:0006096]	tr|A0A109FCW9|A0A109FCW9_9BASI Phosphoglycerate mutase OS=Rhodotorula sp. JG-1b OX=1305733 GN=RHOSPDRAFT_30190 PE=3 SV=1;tr|A0A2S5AZJ1|A0A2S5AZJ1_9BASI Putative Phosphoglycerate mutase (2,3-diphosphoglycerate-dependent) OS=Rhodotorula taiwanensis OX=741276	6	6	6	43.5	43.5	43.5	23.925	214	0	232.49							By matching									By matching		By matching	By matching	422020000	0	0	0	0	0	0	2205900	0
A0A109FD66	unreviewed	6-phosphogluconate dehydrogenase, decarboxylating (EC 1.1.1.44)	RHOSPDRAFT_30382	A0A109FD66;A0A0K3CDM7;A0A2T0A6H7;M7X3Z4;A0A061AYD5;A0A194S5G5	A0A109FD66;A0A0K3CDM7;A0A2T0A6H7;M7X3Z4;A0A061AYD5;A0A194S5G5	Rhodotorula sp. JG-1b	D-gluconate metabolic process [GO:0019521]; pentose-phosphate shunt [GO:0006098]		NADP binding [GO:0050661]; phosphogluconate dehydrogenase (decarboxylating) activity [GO:0004616]	NADP binding [GO:0050661]; phosphogluconate dehydrogenase (decarboxylating) activity [GO:0004616]; D-gluconate metabolic process [GO:0019521]; pentose-phosphate shunt [GO:0006098]	tr|A0A109FD66|A0A109FD66_9BASI 6-phosphogluconate dehydrogenase, decarboxylating OS=Rhodotorula sp. JG-1b OX=1305733 GN=RHOSPDRAFT_30382 PE=3 SV=1;tr|A0A0K3CDM7|A0A0K3CDM7_RHOTO 6-phosphogluconate dehydrogenase, decarboxylating OS=Rhodosporidium toruloides	12	5	10	36.2	31.3	14.2	54.067	492	0	184.98	By matching	By MS/MS		By matching		By matching									By matching	By matching	By matching			1879900000	0	3413200	0	333440	0	402710	0	0
A0A109FDW0	unreviewed	DEAD-domain-containing protein	RHOSPDRAFT_29984	A0A109FDW0;A0A2S5B5M5;CDR48516.1;A0A061BKP0;M7WTM4;A0A0P9EM89	A0A109FDW0;A0A2S5B5M5;CDR48516.1;A0A061BKP0;M7WTM4;A0A0P9EM89	Rhodotorula sp. JG-1b			ATP binding [GO:0005524]; helicase activity [GO:0004386]; nucleic acid binding [GO:0003676]	ATP binding [GO:0005524]; helicase activity [GO:0004386]; nucleic acid binding [GO:0003676]	tr|A0A109FDW0|A0A109FDW0_9BASI DEAD-domain-containing protein OS=Rhodotorula sp. JG-1b OX=1305733 GN=RHOSPDRAFT_29984 PE=4 SV=1;tr|A0A2S5B5M5|A0A2S5B5M5_9BASI Uncharacterized protein OS=Rhodotorula taiwanensis OX=741276 GN=BMF94_4886 PE=4 SV=1;tr|A0A0K3CGW	9	6	9	31.6	31.6	24.4	43.931	389	0.00018155	18.535	By MS/MS	By MS/MS	By MS/MS	By MS/MS	By MS/MS	By MS/MS						By matching	By matching	By MS/MS	By matching	By matching		By MS/MS	By MS/MS	1428600000	30688000	37197000	23396000	14250000	19699000	15391000	0	0
A0A109FE33	unreviewed	Ribosomal protein L6	RHOSPDRAFT_20513	A0A109FE33;A0A194S1V1;A0A2S5B409	A0A109FE33	Rhodotorula sp. JG-1b	translation [GO:0006412]	ribosome [GO:0005840]	rRNA binding [GO:0019843]; structural constituent of ribosome [GO:0003735]	ribosome [GO:0005840]; rRNA binding [GO:0019843]; structural constituent of ribosome [GO:0003735]; translation [GO:0006412]	tr|A0A109FE33|A0A109FE33_9BASI Ribosomal protein L6 OS=Rhodotorula sp. JG-1b OX=1305733 GN=RHOSPDRAFT_20513 PE=4 SV=1	3	3	3	19.1	19.1	19.1	22.355	199	0.0014494	2.6296	By matching	By matching		By matching	By matching	By matching	By matching		By matching			By matching			By matching					316270000	2084700	1490600	0	3841300	7565900	4647700	757790	0
A0A109FEK8	unreviewed	Glyceraldehyde-3-phosphate dehydrogenase (EC 1.2.1.12)	RHOSPDRAFT_26589	A0A109FEK8;A0A194S9R6	A0A109FEK8;A0A194S9R6	Rhodotorula sp. JG-1b	glucose metabolic process [GO:0006006]; glycolytic process [GO:0006096]	cytoplasm [GO:0005737]	glyceraldehyde-3-phosphate dehydrogenase (NAD+) (phosphorylating) activity [GO:0004365]; NAD binding [GO:0051287]; NADP binding [GO:0050661]	cytoplasm [GO:0005737]; glyceraldehyde-3-phosphate dehydrogenase (NAD+) (phosphorylating) activity [GO:0004365]; NAD binding [GO:0051287]; NADP binding [GO:0050661]; glucose metabolic process [GO:0006006]; glycolytic process [GO:0006096]	tr|A0A109FEK8|A0A109FEK8_9BASI Glyceraldehyde-3-phosphate dehydrogenase OS=Rhodotorula sp. JG-1b OX=1305733 GN=RHOSPDRAFT_26589 PE=3 SV=1;tr|A0A194S9R6|A0A194S9R6_RHOGW Uncharacterized protein OS=Rhodotorula graminis (strain WP1) OX=578459 GN=RHOBADRAFT_31	2	1	1	6.5	4.4	4.4	41.214	383	0	25.781	By matching	By matching	By MS/MS	By matching	By matching		By MS/MS	By MS/MS	By matching	By matching	By matching	By matching	By MS/MS	By MS/MS	By MS/MS	By MS/MS	By MS/MS	By MS/MS	By MS/MS	185700000	0	792820	6393000	2267100	2146800	0	0	0
A0A109FEK9	unreviewed	Ribosomal protein 60S	RHOSPDRAFT_26588	A0A109FEK9;A0A2S5BBV0;A0A194S3Y8	A0A109FEK9;A0A2S5BBV0;A0A194S3Y8	Rhodotorula sp. JG-1b	translational elongation [GO:0006414]	ribosome [GO:0005840]	structural constituent of ribosome [GO:0003735]	ribosome [GO:0005840]; structural constituent of ribosome [GO:0003735]; translational elongation [GO:0006414]	tr|A0A109FEK9|A0A109FEK9_9BASI Ribosomal protein 60S OS=Rhodotorula sp. JG-1b OX=1305733 GN=RHOSPDRAFT_26588 PE=3 SV=1;tr|A0A2S5BBV0|A0A2S5BBV0_9BASI Putative 6-deoxyerythronolide-B synthase OS=Rhodotorula taiwanensis OX=741276 GN=BMF94_2661 PE=3 SV=1;tr|A	4	3	3	62.7	50.9	50.9	10.913	110	0	69.821															By matching			By matching	By matching	1893200000	0	0	0	0	0	0	0	0
A0A109FER1	unreviewed	Citrate synthase	RHOSPDRAFT_36004	A0A109FER1;A0A2S5BDP1	A0A109FER1	Rhodotorula sp. JG-1b	citrate metabolic process [GO:0006101]		citrate (Si)-synthase activity [GO:0004108]	citrate (Si)-synthase activity [GO:0004108]; citrate metabolic process [GO:0006101]	tr|A0A109FER1|A0A109FER1_9BASI Citrate synthase OS=Rhodotorula sp. JG-1b OX=1305733 GN=RHOSPDRAFT_36004 PE=3 SV=1	7	7	7	21.2	21.2	21.2	50.466	458	0	86.758	By matching								By matching	By matching	By matching	By matching							By matching	584950000	369310	0	0	0	0	0	0	0
A0A109FFI2	unreviewed	Uncharacterized protein	RHOSPDRAFT_19453	A0A109FFI2;A0A2S5AZT6	A0A109FFI2;A0A2S5AZT6	Rhodotorula sp. JG-1b	translation [GO:0006412]	ribosome [GO:0005840]	structural constituent of ribosome [GO:0003735]	ribosome [GO:0005840]; structural constituent of ribosome [GO:0003735]; translation [GO:0006412]	tr|A0A109FFI2|A0A109FFI2_9BASI Uncharacterized protein OS=Rhodotorula sp. JG-1b OX=1305733 GN=RHOSPDRAFT_19453 PE=4 SV=1;tr|A0A2S5AZT6|A0A2S5AZT6_9BASI Uncharacterized protein OS=Rhodotorula taiwanensis OX=741276 GN=BMF94_6976 PE=4 SV=1	7	6	7	44.7	44.7	39.3	23.889	219	0.00017358	16.533	By MS/MS	By MS/MS	By MS/MS	By MS/MS	By MS/MS	By MS/MS	By matching	By matching	By matching			By matching		By MS/MS		By MS/MS	By matching	By matching	By MS/MS	737640000	9560400	11853000	6483500	6432300	7342300	6038700	2652900	1543600
A0A109FFK7	unreviewed	Heat shock protein 70	RHOSPDRAFT_34777	A0A109FFK7;A0A2S5B3V2	A0A109FFK7;A0A2S5B3V2	Rhodotorula sp. JG-1b			ATP binding [GO:0005524]	ATP binding [GO:0005524]	tr|A0A109FFK7|A0A109FFK7_9BASI Heat shock protein 70 OS=Rhodotorula sp. JG-1b OX=1305733 GN=RHOSPDRAFT_34777 PE=3 SV=1;tr|A0A2S5B3V2|A0A2S5B3V2_9BASI Uncharacterized protein OS=Rhodotorula taiwanensis OX=741276 GN=BMF94_5763 PE=3 SV=1	16	8	16	39.1	39.1	17	68.446	629	0	323.31	By MS/MS	By MS/MS	By matching	By matching	By matching			By matching		By matching	By matching	By matching	By matching	By MS/MS	By matching	By matching	By matching	By matching	By matching	2112800000	3893000	4574600	3417300	1212600	1567800	0	0	785300
A0A109FFY3	unreviewed	Glyceraldehyde-3-phosphate dehydrogenase (EC 1.2.1.12) (Fragment)	RHOSPDRAFT_18917	A0A109FFY3	A0A109FFY3	Rhodotorula sp. JG-1b	glucose metabolic process [GO:0006006]; glycolytic process [GO:0006096]	cytoplasm [GO:0005737]	glyceraldehyde-3-phosphate dehydrogenase (NAD+) (phosphorylating) activity [GO:0004365]; NAD binding [GO:0051287]; NADP binding [GO:0050661]	cytoplasm [GO:0005737]; glyceraldehyde-3-phosphate dehydrogenase (NAD+) (phosphorylating) activity [GO:0004365]; NAD binding [GO:0051287]; NADP binding [GO:0050661]; glucose metabolic process [GO:0006006]; glycolytic process [GO:0006096]	tr|A0A109FFY3|A0A109FFY3_9BASI Glyceraldehyde-3-phosphate dehydrogenase (Fragment) OS=Rhodotorula sp. JG-1b OX=1305733 GN=RHOSPDRAFT_18917 PE=3 SV=1	11	3	9	34.5	30.2	15.5	34.837	328	0.00019448	22.144	By matching	By matching	By matching	By matching	By matching	By matching	By matching	By matching	By matching	By matching	By matching	By matching	By matching	By matching	By matching	By matching	By matching	By matching	By matching	1058800000	0	0	886170	0	0	0	10862000	9714100
A0A109FGM3	unreviewed	CUE domain-containing protein	RHOSPDRAFT_34372	A0A109FGM3;A0A194SAX1;A0A2S5B6W5;EMS26077.1;M7WZJ8;A0A061AT76	A0A109FGM3	Rhodotorula sp. JG-1b					tr|A0A109FGM3|A0A109FGM3_9BASI Uncharacterized protein OS=Rhodotorula sp. JG-1b OX=1305733 GN=RHOSPDRAFT_34372 PE=4 SV=1	4	4	4	7.3	7.3	7.3	99.998	964	0	25.725		By matching																By matching	By matching	74008000	0	3210300	0	0	0	0	0	0
A0A109FGS0	unreviewed	Mitochondrial carrier	RHOSPDRAFT_29402	A0A109FGS0;A0A2T0AIJ5;CDR38479.1;M7X6Q6;A0A2T0AIH6;A0A061AUW4	A0A109FGS0	Rhodotorula sp. JG-1b		integral component of membrane [GO:0016021]		integral component of membrane [GO:0016021]	tr|A0A109FGS0|A0A109FGS0_9BASI Mitochondrial carrier OS=Rhodotorula sp. JG-1b OX=1305733 GN=RHOSPDRAFT_29402 PE=3 SV=1	4	3	4	14.3	14.3	10.9	40.272	384	0.00043431	4.3514		By matching	By matching	By matching							By matching									557660000	0	2545700	1017000	1008500	0	0	0	0
A0A109FGX3	unreviewed	Phosphopyruvate hydratase (EC 4.2.1.11) (Fragment)	RHOSPDRAFT_34388	A0A109FGX3;A0A2S5BJ34;A0A061AL05;M7X749;EMS25895.1;A0A2T0AIZ8	A0A109FGX3	Rhodotorula sp. JG-1b	glycolytic process [GO:0006096]	phosphopyruvate hydratase complex [GO:0000015]	magnesium ion binding [GO:0000287]; phosphopyruvate hydratase activity [GO:0004634]	phosphopyruvate hydratase complex [GO:0000015]; magnesium ion binding [GO:0000287]; phosphopyruvate hydratase activity [GO:0004634]; glycolytic process [GO:0006096]	tr|A0A109FGX3|A0A109FGX3_9BASI Uncharacterized protein (Fragment) OS=Rhodotorula sp. JG-1b OX=1305733 GN=RHOSPDRAFT_34388 PE=4 SV=1	10	10	10	49.3	49.3	49.3	37.552	351	0	90.867	By matching		By matching		By matching										By matching	By matching				1497400000	1919600	0	1159100	0	918290	0	0	0
A0A109FH19	unreviewed	F-box domain-containing protein	RHOSPDRAFT_25807	A0A109FH19	A0A109FH19	Rhodotorula sp. JG-1b					tr|A0A109FH19|A0A109FH19_9BASI Uncharacterized protein OS=Rhodotorula sp. JG-1b OX=1305733 GN=RHOSPDRAFT_25807 PE=4 SV=1	2	2	2	1.8	1.8	1.8	247.34	2221	0.0032953	2.116						By matching	By MS/MS	By matching	By matching	By MS/MS	By matching	By matching	By MS/MS				By matching	By matching	By matching	143660000	0	0	0	0	0	2245400	8244400	6668600
A0A109FH61	unreviewed	ATP synthase subunit 5, mitochondrial	RHOSPDRAFT_33968	A0A109FH61;A0A2S5B2S6	A0A109FH61	Rhodotorula sp. JG-1b		membrane [GO:0016020]	proton-transporting ATP synthase activity, rotational mechanism [GO:0046933]	membrane [GO:0016020]; proton-transporting ATP synthase activity, rotational mechanism [GO:0046933]	tr|A0A109FH61|A0A109FH61_9BASI F1 complex, OSCP/delta subunit of ATPase OS=Rhodotorula sp. JG-1b OX=1305733 GN=RHOSPDRAFT_33968 PE=3 SV=1	5	5	5	28.7	28.7	28.7	23.083	216	0.00044077	4.5561	By matching	By matching	By matching	By matching	By matching	By matching						By matching								440570000	20821000	22738000	15414000	32470000	27323000	1334100	0	0
A0A109FHD2	unreviewed	Alanine--tRNA ligase (EC 6.1.1.7) (Alanyl-tRNA synthetase) (AlaRS)	ALA1 RHOSPDRAFT_34053	A0A109FHD2;A0A0P9EQL1	A0A109FHD2;A0A0P9EQL1	Rhodotorula sp. JG-1b	mitochondrial alanyl-tRNA aminoacylation [GO:0070143]	mitochondrion [GO:0005739]	alanine-tRNA ligase activity [GO:0004813]; ATP binding [GO:0005524]; tRNA binding [GO:0000049]; zinc ion binding [GO:0008270]	mitochondrion [GO:0005739]; alanine-tRNA ligase activity [GO:0004813]; ATP binding [GO:0005524]; tRNA binding [GO:0000049]; zinc ion binding [GO:0008270]; mitochondrial alanyl-tRNA aminoacylation [GO:0070143]	tr|A0A109FHD2|A0A109FHD2_9BASI Alanine--tRNA ligase OS=Rhodotorula sp. JG-1b OX=1305733 GN=ALA1 PE=3 SV=1;tr|A0A0P9EQL1|A0A0P9EQL1_RHOGW Alanine--tRNA ligase OS=Rhodotorula graminis (strain WP1) OX=578459 GN=ALA1 PE=3 SV=1	2	1	2	3.5	3.5	1.8	105.53	956	0.00093668	2.8698							By matching	By matching	By matching	By MS/MS	By matching	By matching	By matching		By matching		By matching	By matching	By matching	3824700000	0	0	0	0	0	0	57300000	50692000
A0A109FHE8	unreviewed	Heat shock protein 70	RHOSPDRAFT_34540	A0A109FHE8;A0A2S5BHN0;M7XMR9;A0A0K3CR26;A0A061BP04;A0A0P9F2J7	A0A109FHE8	Rhodotorula sp. JG-1b			ATP binding [GO:0005524]	ATP binding [GO:0005524]	tr|A0A109FHE8|A0A109FHE8_9BASI Heat shock protein 70 OS=Rhodotorula sp. JG-1b OX=1305733 GN=RHOSPDRAFT_34540 PE=3 SV=1	14	14	14	26.5	26.5	26.5	88.068	807	0	127.35							By matching	By matching			By matching	By matching		By matching	By matching	By matching			By matching	483580000	0	0	0	0	0	0	2208000	1110200
A0A109FJ08	unreviewed	Proteasome-domain-containing protein	RHOSPDRAFT_16479	A0A109FJ08	A0A109FJ08	Rhodotorula sp. JG-1b	ubiquitin-dependent protein catabolic process [GO:0006511]	proteasome core complex, alpha-subunit complex [GO:0019773]	peptidase activity [GO:0008233]	proteasome core complex, alpha-subunit complex [GO:0019773]; peptidase activity [GO:0008233]; ubiquitin-dependent protein catabolic process [GO:0006511]	tr|A0A109FJ08|A0A109FJ08_9BASI Proteasome endopeptidase complex OS=Rhodotorula sp. JG-1b OX=1305733 GN=RHOSPDRAFT_16479 PE=3 SV=1	2	2	2	12.3	12.3	12.3	34.571	324	0.002887	2.1509			By matching		By matching	By matching			By matching						By matching					72343000	0	0	2107200	0	2889300	1942300	0	0
A0A109FJB5	unreviewed	Proteophosphoglycan ppg4	RHOSPDRAFT_16239	A0A109FJB5;A0A2S5BF80;A0A0P9IUP7	A0A109FJB5	Rhodotorula sp. JG-1b					tr|A0A109FJB5|A0A109FJB5_9BASI Proteophosphoglycan ppg4 OS=Rhodotorula sp. JG-1b OX=1305733 GN=RHOSPDRAFT_16239 PE=4 SV=1	10	9	10	21.8	21.8	20.5	92.557	834	0.00019399	21.998							By matching			By matching	By matching	By matching		By matching			By matching	By matching	By matching	201250000	0	0	0	0	0	0	1119600	0
A0A109FJT6	unreviewed	ATP synthase subunit 4, mitochondrial	RHOSPDRAFT_15803	A0A109FJT6	A0A109FJT6	Rhodotorula sp. JG-1b	ATP synthesis coupled proton transport [GO:0015986]	mitochondrial proton-transporting ATP synthase complex, coupling factor F(o) [GO:0000276]	proton transmembrane transporter activity [GO:0015078]	mitochondrial proton-transporting ATP synthase complex, coupling factor F(o) [GO:0000276]; proton transmembrane transporter activity [GO:0015078]; ATP synthesis coupled proton transport [GO:0015986]	tr|A0A109FJT6|A0A109FJT6_9BASI ATP synthase F0 sector subunit 4 OS=Rhodotorula sp. JG-1b OX=1305733 GN=RHOSPDRAFT_15803 PE=4 SV=1	3	1	3	15.7	15.7	5.1	25.87	236	0.00042571	4.1307				By matching		By matching						By matching					By matching	By matching		307170000	0	0	0	926510	0	626200	0	0
A0A109FKA3	unreviewed	Heat shock protein 90	RHOSPDRAFT_32104	A0A109FKA3;A0A2S5BDM1;A2A6A2;B7ZC49;A0A2S5BDL5;B7ZC50;Q8C2A9	A0A109FKA3	Rhodotorula sp. JG-1b	protein folding [GO:0006457]		ATP binding [GO:0005524]; unfolded protein binding [GO:0051082]	ATP binding [GO:0005524]; unfolded protein binding [GO:0051082]; protein folding [GO:0006457]	tr|A0A109FKA3|A0A109FKA3_9BASI Heat shock protein 90 OS=Rhodotorula sp. JG-1b OX=1305733 GN=RHOSPDRAFT_32104 PE=3 SV=1	17	4	12	28.1	21.3	7.4	81.054	715	0	269.35	By matching	By matching	By matching	By MS/MS	By MS/MS	By MS/MS	By matching	By matching	By matching	By matching	By matching	By matching	By matching	By MS/MS	By MS/MS	By MS/MS	By MS/MS	By MS/MS	By MS/MS	1182400000	9957700	2276200	3701200	7009800	3342200	8100800	4439700	3874900
A0A109FKF0	unreviewed	DNA-directed RNA polymerase subunit (EC 2.7.7.6)	RHOSPDRAFT_32493	A0A109FKF0;A0A2S5B670;Q0MX51;A0A140D5N0;A0A140D5M9;A0A126QET8;A0A140D5N1;A0A140D5L2;A0A0P9FD13	A0A109FKF0;A0A2S5B670;Q0MX51;A0A140D5N0;A0A140D5M9;A0A126QET8;A0A140D5N1;A0A140D5L2;A0A0P9FD13	Rhodotorula sp. JG-1b	transcription by RNA polymerase II [GO:0006366]	nucleus [GO:0005634]	DNA binding [GO:0003677]; DNA-directed 5'-3' RNA polymerase activity [GO:0003899]; metal ion binding [GO:0046872]	nucleus [GO:0005634]; DNA binding [GO:0003677]; DNA-directed 5'-3' RNA polymerase activity [GO:0003899]; metal ion binding [GO:0046872]; transcription by RNA polymerase II [GO:0006366]	tr|A0A109FKF0|A0A109FKF0_9BASI DNA-directed RNA polymerase subunit OS=Rhodotorula sp. JG-1b OX=1305733 GN=RHOSPDRAFT_32493 PE=3 SV=1;tr|A0A2S5B670|A0A2S5B670_9BASI DNA-directed RNA polymerase subunit OS=Rhodotorula taiwanensis OX=741276 GN=BMF94_4585 PE=3	2	2	2	1.7	1.7	1.7	195.34	1782	0.0099709	1.5562	By matching	By matching	By MS/MS	By matching	By matching												By matching			1350900000	3084500	4653700	3246300	2773900	3008400	0	0	0
A0A109FKK6	unreviewed	CYTOSOL_AP domain-containing protein	RHOSPDRAFT_15434	A0A109FKK6;A0A194S7H5;M7WKL1;A0A061BE58;A0A2S5BDN8	A0A109FKK6	Rhodotorula sp. JG-1b		cytoplasm [GO:0005737]	manganese ion binding [GO:0030145]; metalloaminopeptidase activity [GO:0070006]	cytoplasm [GO:0005737]; manganese ion binding [GO:0030145]; metalloaminopeptidase activity [GO:0070006]	tr|A0A109FKK6|A0A109FKK6_9BASI Uncharacterized protein OS=Rhodotorula sp. JG-1b OX=1305733 GN=RHOSPDRAFT_15434 PE=3 SV=1	3	2	3	9.9	9.9	7.5	53.647	505	0.00046221	5.2365									By matching					By matching	By matching	By matching	By MS/MS		By MS/MS	493450000	0	0	0	0	0	0	0	0
A0A109FKY5	unreviewed	ATP synthase subunit beta (EC 7.1.2.2)	RHOSPDRAFT_15319	A0A109FKY5;A0A2S5BC82;A0A194S9K7;M7WXX4;G0SXU8;A0A0K3CLW3;A0A061BL56;A0A2S5BCB6	A0A109FKY5;A0A2S5BC82;A0A194S9K7;M7WXX4;G0SXU8;A0A0K3CLW3;A0A061BL56	Rhodotorula sp. JG-1b		proton-transporting ATP synthase complex, catalytic core F(1) [GO:0045261]	ATP binding [GO:0005524]; proton-transporting ATPase activity, rotational mechanism [GO:0046961]; proton-transporting ATP synthase activity, rotational mechanism [GO:0046933]	proton-transporting ATP synthase complex, catalytic core F(1) [GO:0045261]; ATP binding [GO:0005524]; proton-transporting ATP synthase activity, rotational mechanism [GO:0046933]; proton-transporting ATPase activity, rotational mechanism [GO:0046961]	tr|A0A109FKY5|A0A109FKY5_9BASI ATP synthase subunit beta OS=Rhodotorula sp. JG-1b OX=1305733 GN=RHOSPDRAFT_15319 PE=3 SV=1;tr|A0A2S5BC82|A0A2S5BC82_9BASI ATP synthase subunit beta OS=Rhodotorula taiwanensis OX=741276 GN=BMF94_2574 PE=3 SV=1;tr|A0A194S9K7|A	18	10	11	57.3	41	38.6	57.969	541	0	323.31	By matching	By matching	By matching	By matching	By matching	By matching	By matching	By matching	By matching	By matching	By matching	By matching	By matching	By matching	By matching	By matching	By matching	By matching	By matching	3568700000	0	0	0	1611800	1221100	1664200	0	0
A0A109FLC4	unreviewed	Ribosomal protein L16a	RHOSPDRAFT_15213	A0A109FLC4;A0A2S5BIQ1;A0A194S5G6	A0A109FLC4;A0A2S5BIQ1	Rhodotorula sp. JG-1b	translation [GO:0006412]	large ribosomal subunit [GO:0015934]	structural constituent of ribosome [GO:0003735]	large ribosomal subunit [GO:0015934]; structural constituent of ribosome [GO:0003735]; translation [GO:0006412]	tr|A0A109FLC4|A0A109FLC4_9BASI Ribosomal protein L16a OS=Rhodotorula sp. JG-1b OX=1305733 GN=RHOSPDRAFT_15213 PE=3 SV=1;tr|A0A2S5BIQ1|A0A2S5BIQ1_9BASI Uncharacterized protein OS=Rhodotorula taiwanensis OX=741276 GN=BMF94_0239 PE=3 SV=1	3	3	3	16.3	16.3	16.3	22.783	203	0.0022199	2.4837											By matching	By matching								174240000	0	0	0	0	0	0	0	0
A0A109FLJ3	unreviewed	5-aminoimidazole-4-carboxamide ribonucleotide formyltransferase (EC 2.1.2.3) (EC 3.5.4.10) (AICAR transformylase) (IMP synthase) (Inosinicase) (Phosphoribosylaminoimidazolecarboxamide formyltransferase)	RHOSPDRAFT_31602	A0A109FLJ3;A0A194SBQ1;A0A2S5B0S2;M7X3F9;A0A0K3CA69;A0A061AMH6	A0A109FLJ3;A0A194SBQ1;A0A2S5B0S2	Rhodotorula sp. JG-1b	'de novo' IMP biosynthetic process [GO:0006189]		IMP cyclohydrolase activity [GO:0003937]; phosphoribosylaminoimidazolecarboxamide formyltransferase activity [GO:0004643]	IMP cyclohydrolase activity [GO:0003937]; phosphoribosylaminoimidazolecarboxamide formyltransferase activity [GO:0004643]; 'de novo' IMP biosynthetic process [GO:0006189]	tr|A0A109FLJ3|A0A109FLJ3_9BASI AICARFT/IMPCHase bienzyme OS=Rhodotorula sp. JG-1b OX=1305733 GN=RHOSPDRAFT_31602 PE=3 SV=1;tr|A0A194SBQ1|A0A194SBQ1_RHOGW Uncharacterized protein OS=Rhodotorula graminis (strain WP1) OX=578459 GN=RHOBADRAFT_47823 PE=3 SV=1;t	6	5	5	16.8	14.7	14.7	67.479	619	0.00030062	10.873											By matching	By matching	By matching							101260000	0	0	0	0	0	0	0	0
A0A109FLK7	unreviewed	Putative ser/thr protein phosphatase 2A regulatory subunit A	RHOSPDRAFT_28229	A0A109FLK7;A0A2S5B3I0;M7X2I6;CDR36007.1;A0A061AES2	A0A109FLK7;A0A2S5B3I0;M7X2I6;CDR36007.1;A0A061AES2	Rhodotorula sp. JG-1b					tr|A0A109FLK7|A0A109FLK7_9BASI Putative ser/thr protein phosphatase 2A regulatory subunit A OS=Rhodotorula sp. JG-1b OX=1305733 GN=RHOSPDRAFT_28229 PE=4 SV=1;tr|A0A2S5B3I0|A0A2S5B3I0_9BASI Uncharacterized protein OS=Rhodotorula taiwanensis OX=741276 GN=BMF	4	4	4	8.2	8.2	8.2	68.297	621	0.00051282	3.7294	By matching	By MS/MS	By matching	By matching	By MS/MS	By matching										By matching				423040000	17263000	22362000	13805000	11477000	10880000	1010100	0	0
A0A109FMB6	unreviewed	ATP synthase subunit d, mitochondrial	RHOSPDRAFT_31170	A0A109FMB6;A0A2S5BCU0;A0A194S343	A0A109FMB6	Rhodotorula sp. JG-1b	ATP synthesis coupled proton transport [GO:0015986]	mitochondrial proton-transporting ATP synthase complex, coupling factor F(o) [GO:0000276]	proton transmembrane transporter activity [GO:0015078]	mitochondrial proton-transporting ATP synthase complex, coupling factor F(o) [GO:0000276]; proton transmembrane transporter activity [GO:0015078]; ATP synthesis coupled proton transport [GO:0015986]	tr|A0A109FMB6|A0A109FMB6_9BASI ATP synthase subunit d, mitochondrial OS=Rhodotorula sp. JG-1b OX=1305733 GN=RHOSPDRAFT_31170 PE=3 SV=1	5	5	5	36.3	36.3	36.3	18.309	168	0.00025497	6.8369	By matching	By matching	By matching		By matching		By matching	By matching	By matching						By matching					380580000	1401100	806250	1308300	0	1412100	0	3000200	2822800
A0A109FMR3	unreviewed	S-(hydroxymethyl)glutathione dehydrogenase (EC 1.1.1.284)	RHOSPDRAFT_13914	A0A109FMR3;A0A0G2JGS3;Q6P5I3;M7XJI6;A0A2S5AZR0;A0A194SDD7;A0A0K3CDD2;A0A061B927;P28474	A0A109FMR3;A0A0G2JGS3;Q6P5I3;M7XJI6;A0A2S5AZR0;A0A194SDD7;A0A0K3CDD2;A0A061B927;P28474	Rhodotorula sp. JG-1b	ethanol oxidation [GO:0006069]		S-(hydroxymethyl)glutathione dehydrogenase activity [GO:0051903]; zinc ion binding [GO:0008270]	S-(hydroxymethyl)glutathione dehydrogenase activity [GO:0051903]; zinc ion binding [GO:0008270]; ethanol oxidation [GO:0006069]	tr|A0A109FMR3|A0A109FMR3_9BASI S-(hydroxymethyl)glutathione dehydrogenase OS=Rhodotorula sp. JG-1b OX=1305733 GN=RHOSPDRAFT_13914 PE=3 SV=1;tr|A0A0G2JGS3|A0A0G2JGS3_MOUSE Alcohol dehydrogenase class-3 OS=Mus musculus OX=10090 GN=Adh5 PE=1 SV=1;tr|Q6P5I3|Q6	2	2	2	6.1	6.1	6.1	40.347	378	0.0068811	1.7849								By matching	By matching		By matching	By matching		By matching						172740000	0	0	0	0	0	0	0	11021000
A0A109FMU5	unreviewed	Uncharacterized protein	RHOSPDRAFT_30736	A0A109FMU5	A0A109FMU5	Rhodotorula sp. JG-1b					tr|A0A109FMU5|A0A109FMU5_9BASI Uncharacterized protein OS=Rhodotorula sp. JG-1b OX=1305733 GN=RHOSPDRAFT_30736 PE=4 SV=1	4	4	4	44.9	44.9	44.9	17.583	178	0	191.59			By matching				By matching						By matching		By matching		By matching	By matching		293930000	0	0	1177700	0	0	0	1024800	0
A0A109FMY4	unreviewed	Acetyltransferase component of pyruvate dehydrogenase complex (EC 2.3.1.12)	RHOSPDRAFT_28054	A0A109FMY4;A0A2T0AAR6;A0A0K3CEE9;M7WIG9;A0A061B0V2;A0A194SDL6	A0A109FMY4	Rhodotorula sp. JG-1b	pyruvate metabolic process [GO:0006090]	mitochondrial matrix [GO:0005759]; pyruvate dehydrogenase complex [GO:0045254]	dihydrolipoyllysine-residue acetyltransferase activity [GO:0004742]	mitochondrial matrix [GO:0005759]; pyruvate dehydrogenase complex [GO:0045254]; dihydrolipoyllysine-residue acetyltransferase activity [GO:0004742]; pyruvate metabolic process [GO:0006090]	tr|A0A109FMY4|A0A109FMY4_9BASI Acetyltransferase component of pyruvate dehydrogenase complex OS=Rhodotorula sp. JG-1b OX=1305733 GN=RHOSPDRAFT_28054 PE=3 SV=1	6	6	6	21.3	21.3	21.3	50.159	475	0	131.84				By matching	By matching	By matching						By matching			By matching					281930000	0	0	0	307390	652380	603330	0	0
A0A109FN17	unreviewed	Elongation factor 2	RHOSPDRAFT_30946	A0A109FN17	A0A109FN17	Rhodotorula sp. JG-1b			GTPase activity [GO:0003924]; GTP binding [GO:0005525]; translation elongation factor activity [GO:0003746]	GTP binding [GO:0005525]; GTPase activity [GO:0003924]; translation elongation factor activity [GO:0003746]	tr|A0A109FN17|A0A109FN17_9BASI Elongation factor 2 OS=Rhodotorula sp. JG-1b OX=1305733 GN=RHOSPDRAFT_30946 PE=4 SV=1	21	7	19	35.4	32.3	10.8	93.298	842	0	90.858	By matching	By matching	By MS/MS	By matching	By MS/MS	By MS/MS	By matching	By MS/MS	By matching	By matching	By MS/MS	By matching	By matching	By matching	By matching	By matching	By matching	By matching	By matching	1491000000	18890000	19670000	17373000	4203200	13376000	13709000	9784200	10234000
A0A120E5Z9	unreviewed	Calcium-transporting ATPase (EC 7.2.2.10)	RHOSPDRAFT_30379	A0A120E5Z9;A0A2S5BC42	A0A120E5Z9;A0A2S5BC42	Rhodotorula sp. JG-1b		integral component of membrane [GO:0016021]	ATP binding [GO:0005524]; calcium transmembrane transporter activity, phosphorylative mechanism [GO:0005388]	integral component of membrane [GO:0016021]; ATP binding [GO:0005524]; calcium transmembrane transporter activity, phosphorylative mechanism [GO:0005388]	tr|A0A120E5Z9|A0A120E5Z9_9BASI Calcium-transporting ATPase OS=Rhodotorula sp. JG-1b OX=1305733 GN=RHOSPDRAFT_30379 PE=3 SV=1;tr|A0A2S5BC42|A0A2S5BC42_9BASI Calcium-transporting ATPase OS=Rhodotorula taiwanensis OX=741276 GN=BMF94_2539 PE=3 SV=1	1	1	1	1.3	1.3	1.3	107.96	997	0.00024935	6.4417	By MS/MS	By MS/MS	By MS/MS	By MS/MS	By MS/MS	By MS/MS	By MS/MS	By MS/MS	By MS/MS	By MS/MS	By matching			By MS/MS	By MS/MS	By MS/MS	By MS/MS	By MS/MS	By MS/MS	354500000	22034000	21487000	18453000	12546000	9626100	6811600	1532200	2298100
A0A120E618	unreviewed	Prolyl-tRNA synthetase (EC 6.1.1.15)	RHOSPDRAFT_22401	A0A120E618;A0A2S5BDD2;A0A194S7Q0;M7WXC3;CDR46780.1;A0A061BIG2	A0A120E618;A0A2S5BDD2	Rhodotorula sp. JG-1b	prolyl-tRNA aminoacylation [GO:0006433]	cytoplasm [GO:0005737]	ATP binding [GO:0005524]; proline-tRNA ligase activity [GO:0004827]	cytoplasm [GO:0005737]; ATP binding [GO:0005524]; proline-tRNA ligase activity [GO:0004827]; prolyl-tRNA aminoacylation [GO:0006433]	tr|A0A120E618|A0A120E618_9BASI Prolyl-tRNA synthetase OS=Rhodotorula sp. JG-1b OX=1305733 GN=RHOSPDRAFT_22401 PE=3 SV=1;tr|A0A2S5BDD2|A0A2S5BDD2_9BASI Putative Proline--tRNA ligase, or putative Glutamate--tRNA ligase OS=Rhodotorula taiwanensis OX=741276 GN	6	6	6	14.7	14.7	14.7	69.105	626	0.00031516	12.335	By matching	By matching												By matching	By matching					65407000	1881400	1750600	0	0	0	0	0	0
A0A120E6E9	unreviewed	Ribosomal protein S14 (Fragment)	RHOSPDRAFT_21292	A0A120E6E9;A0A194S0U0;A0A109FB35	A0A120E6E9;A0A194S0U0	Rhodotorula sp. JG-1b	translation [GO:0006412]	ribosome [GO:0005840]	structural constituent of ribosome [GO:0003735]	ribosome [GO:0005840]; structural constituent of ribosome [GO:0003735]; translation [GO:0006412]	tr|A0A120E6E9|A0A120E6E9_9BASI Ribosomal protein S14 (Fragment) OS=Rhodotorula sp. JG-1b OX=1305733 GN=RHOSPDRAFT_21292 PE=3 SV=1;tr|A0A194S0U0|A0A194S0U0_RHOGW Uncharacterized protein OS=Rhodotorula graminis (strain WP1) OX=578459 GN=RHOBADRAFT_44645 PE=3	5	3	5	42.4	42.4	27.9	17.499	165	0.00025684	6.9693									By matching	By matching	By matching	By matching		By MS/MS	By MS/MS	By matching	By matching	By matching		572340000	0	0	0	0	0	0	0	0
A0A120E758	unreviewed	Uncharacterized protein	RHOSPDRAFT_26241	A0A120E758	A0A120E758	Rhodotorula sp. JG-1b					tr|A0A120E758|A0A120E758_9BASI Uncharacterized protein OS=Rhodotorula sp. JG-1b OX=1305733 GN=RHOSPDRAFT_26241 PE=4 SV=1	4	4	4	11.7	11.7	11.7	47.641	443	0.00044818	4.7752							By matching			By matching	By matching	By matching								106590000	0	0	0	0	0	0	606820	0
A0A120E7H9	unreviewed	Creatinase/aminopeptidase (Fragment)	RHOSPDRAFT_6605	A0A120E7H9	A0A120E7H9	Rhodotorula sp. JG-1b			aminopeptidase activity [GO:0004177]	aminopeptidase activity [GO:0004177]	tr|A0A120E7H9|A0A120E7H9_9BASI Creatinase/aminopeptidase (Fragment) OS=Rhodotorula sp. JG-1b OX=1305733 GN=RHOSPDRAFT_6605 PE=4 SV=1	3	2	3	17.9	17.9	14.6	39.248	363	0.00031158	11.962					By matching	By matching														56277000	0	0	0	0	852880	749280	0	0
A0A120E984	unreviewed	Ribosomal_L19e domain-containing protein	RHOSPDRAFT_31607	A0A120E984;A0A2S5B0U6;A0A194SBL6;M7WVL3;EMS24637.1;A2A547;A0A061AEC3;Q5I0T8;P84099	A0A120E984;A0A2S5B0U6	Rhodotorula sp. JG-1b	translation [GO:0006412]	cytosolic large ribosomal subunit [GO:0022625]	RNA binding [GO:0003723]; structural constituent of ribosome [GO:0003735]	cytosolic large ribosomal subunit [GO:0022625]; RNA binding [GO:0003723]; structural constituent of ribosome [GO:0003735]; translation [GO:0006412]	tr|A0A120E984|A0A120E984_9BASI Uncharacterized protein OS=Rhodotorula sp. JG-1b OX=1305733 GN=RHOSPDRAFT_31607 PE=3 SV=1;tr|A0A2S5B0U6|A0A2S5B0U6_9BASI Uncharacterized protein OS=Rhodotorula taiwanensis OX=741276 GN=BMF94_6656 PE=3 SV=1	5	5	5	25.6	25.6	25.6	22.652	195	0	30.087		By matching						By matching	By matching				By matching	By matching	By matching		By matching		By matching	396850000	0	535240	0	0	0	0	0	1991300
A0A120E9D7	unreviewed	40S ribosomal protein S21	RHOSPDRAFT_31194	A0A120E9D7;A0A2S5B0Y2;M7X1F6;A0A061ASF9;A0A194S2X6	A0A120E9D7;A0A2S5B0Y2;M7X1F6;A0A061ASF9	Rhodotorula sp. JG-1b	rRNA processing [GO:0006364]; translation [GO:0006412]	cytoplasm [GO:0005737]; ribosome [GO:0005840]	structural constituent of ribosome [GO:0003735]	cytoplasm [GO:0005737]; ribosome [GO:0005840]; structural constituent of ribosome [GO:0003735]; rRNA processing [GO:0006364]; translation [GO:0006412]	tr|A0A120E9D7|A0A120E9D7_9BASI 40S ribosomal protein S21 OS=Rhodotorula sp. JG-1b OX=1305733 GN=RHOSPDRAFT_31194 PE=3 SV=1;tr|A0A2S5B0Y2|A0A2S5B0Y2_9BASI 40S ribosomal protein S21 OS=Rhodotorula taiwanensis OX=741276 GN=BMF94_6510 PE=3 SV=1;tr|M7X1F6|M7X1F	3	3	3	48.8	48.8	48.8	9.0089	84	0	31.821				By matching													By matching	By matching		108290000	0	0	0	882410	0	0	0	0
A0A125PHI4	unreviewed	Aconitate hydratase, mitochondrial (Aconitase) (EC 4.2.1.-)	RHOSPDRAFT_23041	A0A125PHI4;A0A2S5B731;M7X6X3;A0A2S9ZW40;A0A061AM03;A0A0K3CP18;A0A194S6Z0	A0A125PHI4;A0A2S5B731;M7X6X3;A0A2S9ZW40;A0A061AM03	Rhodotorula sp. JG-1b	tricarboxylic acid cycle [GO:0006099]	mitochondrion [GO:0005739]	4 iron, 4 sulfur cluster binding [GO:0051539]; aconitate hydratase activity [GO:0003994]; metal ion binding [GO:0046872]	mitochondrion [GO:0005739]; 4 iron, 4 sulfur cluster binding [GO:0051539]; aconitate hydratase activity [GO:0003994]; metal ion binding [GO:0046872]; tricarboxylic acid cycle [GO:0006099]	tr|A0A125PHI4|A0A125PHI4_9BASI Aconitate hydratase, mitochondrial OS=Rhodotorula sp. JG-1b OX=1305733 GN=RHOSPDRAFT_23041 PE=3 SV=1;tr|A0A2S5B731|A0A2S5B731_9BASI Aconitate hydratase, mitochondrial OS=Rhodotorula taiwanensis OX=741276 GN=BMF94_4406 PE=3 SV	14	12	14	25.2	25.2	22.9	84.254	782	0	32.531	By MS/MS	By MS/MS	By MS/MS	By matching			By matching	By matching	By MS/MS	By matching	By MS/MS	By matching	By matching	By matching	By matching		By matching	By matching		919810000	10660000	11012000	7585700	8430100	0	0	9292400	9329600
A0A125PHM0	unreviewed	Putative YEF3-translation elongation factor eEF3	RHOSPDRAFT_22495	A0A125PHM0;CDR42540.1;A0A061AZA9;A0A2S5BC01;M7X3Q5	A0A125PHM0	Rhodotorula sp. JG-1b			ATPase activity [GO:0016887]; ATP binding [GO:0005524]; translation elongation factor activity [GO:0003746]	ATP binding [GO:0005524]; ATPase activity [GO:0016887]; translation elongation factor activity [GO:0003746]	tr|A0A125PHM0|A0A125PHM0_9BASI Putative YEF3-translation elongation factor eEF3 OS=Rhodotorula sp. JG-1b OX=1305733 GN=RHOSPDRAFT_22495 PE=4 SV=1	14	14	14	19.5	19.5	19.5	118.25	1069	0	35.86																	By matching	By matching	By matching	634820000	0	0	0	0	0	0	0	0
A0A125PIH3	unreviewed	40S ribosomal protein S0	RPS0 RHOSPDRAFT_17976	A0A125PIH3;A0A0P9F7Z0;A0A2S5B2T1;M7WU96;G0SYU2;A0A061AVR2	A0A125PIH3	Rhodotorula sp. JG-1b	ribosomal small subunit assembly [GO:0000028]; translation [GO:0006412]	cytosolic small ribosomal subunit [GO:0022627]	structural constituent of ribosome [GO:0003735]	cytosolic small ribosomal subunit [GO:0022627]; structural constituent of ribosome [GO:0003735]; ribosomal small subunit assembly [GO:0000028]; translation [GO:0006412]	tr|A0A125PIH3|A0A125PIH3_9BASI 40S ribosomal protein S0 OS=Rhodotorula sp. JG-1b OX=1305733 GN=RPS0 PE=3 SV=1	5	4	4	29.2	24.9	24.9	30.549	281	0	25.293	By matching	By matching	By matching														By matching		By matching	508490000	0	0	0	0	0	0	0	0
A0A125PIR0	unreviewed	Ubiquitin-like protein	RHOSPDRAFT_33204	A0A125PIR0	A0A125PIR0	Rhodotorula sp. JG-1b					tr|A0A125PIR0|A0A125PIR0_9BASI Ubiquitin-like protein OS=Rhodotorula sp. JG-1b OX=1305733 GN=RHOSPDRAFT_33204 PE=4 SV=1	1	1	1	17.9	17.9	17.9	8.7602	78	0	135.87																	By matching		By matching	107600000	0	0	0	0	0	0	0	0
A0A125PIR6	unreviewed	RNA-binding domain-containing protein	RHOSPDRAFT_33235	A0A125PIR6	A0A125PIR6	Rhodotorula sp. JG-1b	eukaryotic translation initiation factor 4F complex assembly [GO:0097010]		RNA strand annealing activity [GO:0033592]	RNA strand annealing activity [GO:0033592]; eukaryotic translation initiation factor 4F complex assembly [GO:0097010]	tr|A0A125PIR6|A0A125PIR6_9BASI RNA-binding domain-containing protein OS=Rhodotorula sp. JG-1b OX=1305733 GN=RHOSPDRAFT_33235 PE=4 SV=1	2	2	2	5.7	5.7	5.7	52.303	505	0.0096863	1.5715	By matching	By matching	By matching		By MS/MS	By matching							By matching							38305000	3896600	4211600	4073300	0	5330300	2308600	0	0
A0A140LHI8	unreviewed	Galectin	Lgals4	A0A140LHI8;Q52LA0;Q3UL35;A5XZ79;A5XZ78;Q8K419;A0A087WSD9;A5XZ82;O54891;A8DEK1;A8DEJ7;A8DEH6;A8DEG8	A0A140LHI8;Q52LA0;Q3UL35;A5XZ79;A5XZ78;Q8K419	Mus musculus (Mouse)			carbohydrate binding [GO:0030246]	carbohydrate binding [GO:0030246]	tr|A0A140LHI8|A0A140LHI8_MOUSE Galectin OS=Mus musculus OX=10090 GN=Lgals4 PE=1 SV=1;tr|Q52LA0|Q52LA0_MOUSE Galectin OS=Mus musculus OX=10090 GN=Lgals4 PE=2 SV=1;tr|Q3UL35|Q3UL35_MOUSE Galectin OS=Mus musculus OX=10090 GN=Lgals4 PE=2 SV=1;tr|A5XZ79|A5XZ79_	10	10	10	46	46	46	33.944	302	0	111.57	By MS/MS	By MS/MS	By MS/MS	By MS/MS	By MS/MS	By MS/MS	By MS/MS	By MS/MS	By MS/MS	By MS/MS	By MS/MS	By MS/MS	By MS/MS	By MS/MS	By MS/MS	By MS/MS	By MS/MS	By MS/MS	By MS/MS	6007900000	174280000	167940000	156080000	77951000	103870000	70214000	36712000	44791000
A0A140LI77	unreviewed	40S ribosomal protein S3	Rps3	A0A140LI77;D3YV43;Q9CZP6;Q5YLW3;Q3UCL7;P62908;Q9D0A2;Q3UK56;O89068	A0A140LI77;D3YV43;Q9CZP6;Q5YLW3;Q3UCL7;P62908;Q9D0A2;Q3UK56;O89068	Mus musculus (Mouse)		mitochondrial inner membrane [GO:0005743]; ribosome [GO:0005840]	RNA binding [GO:0003723]	mitochondrial inner membrane [GO:0005743]; ribosome [GO:0005840]; RNA binding [GO:0003723]	tr|A0A140LI77|A0A140LI77_MOUSE 40S ribosomal protein S3 OS=Mus musculus OX=10090 GN=Rps3 PE=1 SV=1;tr|D3YV43|D3YV43_MOUSE 40S ribosomal protein S3 OS=Mus musculus OX=10090 GN=Rps3 PE=1 SV=1;tr|Q9CZP6|Q9CZP6_MOUSE Uncharacterized protein OS=Mus musculus OX=	4	3	3	29.2	23.6	23.6	15.797	144	0.00019948	23.687	By MS/MS	By MS/MS	By MS/MS	By MS/MS	By MS/MS	By MS/MS	By MS/MS	By MS/MS	By MS/MS	By MS/MS	By matching	By MS/MS	By matching	By MS/MS	By MS/MS	By MS/MS	By MS/MS	By MS/MS	By MS/MS	1494500000	25601000	31546000	31243000	18906000	18516000	15708000	16108000	17733000
A0A140T8M5	unreviewed	Immunoglobulin kappa variable 6-15 (Fragment)	Igkv6-15	A0A140T8M5;Q8VIJ0	A0A140T8M5;Q8VIJ0	Mus musculus (Mouse)	immune response [GO:0006955]; immunoglobulin production [GO:0002377]	extracellular space [GO:0005615]		extracellular space [GO:0005615]; immune response [GO:0006955]; immunoglobulin production [GO:0002377]	tr|A0A140T8M5|A0A140T8M5_MOUSE Immunoglobulin kappa variable 6-15 (Fragment) OS=Mus musculus OX=10090 GN=Igkv6-15 PE=1 SV=2;tr|Q8VIJ0|Q8VIJ0_MOUSE Anti-DNA light chain (Fragment) OS=Mus musculus OX=10090 GN=Igkv6-14 PE=2 SV=1	3	2	3	26.1	26.1	18.3	12.757	115	0.00019113	21.072			By matching	By matching			By matching	By matching	By matching			By matching				By matching	By matching			440060000	0	0	1453700	1433900	0	0	799200	1348100
A0A140T8N2		Deleted.		A0A140T8N2;P01642	A0A140T8N2;P01642						tr|A0A140T8N2|A0A140T8N2_MOUSE Protein Igkv5-48 (Fragment) OS=Mus musculus OX=10090 GN=Igkv5-48 PE=1 SV=2;sp|P01642|KV5A9_MOUSE Ig kappa chain V-V region L7 (Fragment) OS=Mus musculus OX=10090 GN=Gm10881 PE=1 SV=1	2	2	2	23.5	23.5	23.5	12.615	115	0.00026199	7.3734				By matching	By matching	By MS/MS	By matching	By matching	By matching		By matching	By matching	By MS/MS							1004300000	0	0	0	2228300	1933400	3357800	749480	1154700
A0A140T8P3	unreviewed	Immunoglobulin kappa chain variable 15-103 (Fragment)	Igkv15-103	A0A140T8P3	A0A140T8P3	Mus musculus (Mouse)	immune response [GO:0006955]; immunoglobulin production [GO:0002377]	extracellular space [GO:0005615]		extracellular space [GO:0005615]; immune response [GO:0006955]; immunoglobulin production [GO:0002377]	tr|A0A140T8P3|A0A140T8P3_MOUSE Immunoglobulin kappa chain variable 15-103 (Fragment) OS=Mus musculus OX=10090 GN=Igkv15-103 PE=4 SV=2	1	1	1	9.6	9.6	9.6	12.547	115	0.0020639	2.5656			By matching	By matching	By matching		By matching	By matching												110780000	0	0	1398500	1675100	2852100	0	2957000	2682000
A0A143Q1S5	unreviewed	50S ribosomal protein L18	rplR A4V07_05680 ADV92_08565 B1A73_02205 B2G46_07915 B5D07_07635 B5F04_04295 B5G22_03420 BBP13_01790 BFD03_07270 BHL82_07815 BHL89_08575 CBF96_06850 CBG21_07010 CBG24_08190	A0A143Q1S5	A0A143Q1S5	Lactobacillus reuteri	translation [GO:0006412]	ribosome [GO:0005840]	rRNA binding [GO:0019843]; structural constituent of ribosome [GO:0003735]	ribosome [GO:0005840]; rRNA binding [GO:0019843]; structural constituent of ribosome [GO:0003735]; translation [GO:0006412]	tr|A0A143Q1S5|A0A143Q1S5_LACRE 50S ribosomal protein L18 OS=Lactobacillus reuteri OX=1598 GN=rplR PE=3 SV=1	3	3	3	33.9	33.9	33.9	13.342	121	0	26.75		By matching	By MS/MS								By matching	By MS/MS					By matching			147920000	0	581520	1380400	0	0	0	0	0
A0A173Z4I9	unreviewed	Aminotransferase class I/II-fold pyridoxal phosphate-dependent enzyme (Methionine gamma-lyase) (EC 4.4.1.11) (O-acetylhomoserine aminocarboxypropyltransferase) (O-acetylhomoserine aminocarboxypropyltransferase/cysteine synthase)	mdeA_1 A4U99_10400 ERS852411_00363 ERS852504_00103 ERS852544_00388 GKE90_03445 GKE97_04275 GXM20_06750	A0A173Z4I9	A0A173Z4I9	Flavonifractor plautii (Fusobacterium plautii)	transsulfuration [GO:0019346]		methionine gamma-lyase activity [GO:0018826]; pyridoxal phosphate binding [GO:0030170]; transaminase activity [GO:0008483]; transferase activity, transferring alkyl or aryl (other than methyl) groups [GO:0016765]	methionine gamma-lyase activity [GO:0018826]; pyridoxal phosphate binding [GO:0030170]; transaminase activity [GO:0008483]; transferase activity, transferring alkyl or aryl (other than methyl) groups [GO:0016765]; transsulfuration [GO:0019346]	tr|A0A173Z4I9|A0A173Z4I9_9FIRM Methionine gamma-lyase OS=Flavonifractor plautii OX=292800 GN=mdeA_1 PE=3 SV=1	7	3	4	31.5	20.3	17.7	46.216	429	0	30.369							By MS/MS	By MS/MS	By MS/MS	By MS/MS	By MS/MS	By MS/MS	By MS/MS							306940000	0	0	0	0	0	0	1999600	1948500
A0A174DBR8	unreviewed	50S ribosomal protein L30	rpmD A4U99_01895 B5F52_12430 ERS852411_01177 ERS852504_03471 ERS852544_00686 GKE90_13330 GKE97_06730 GXM20_01985	A0A174DBR8	A0A174DBR8	Flavonifractor plautii (Fusobacterium plautii)	translation [GO:0006412]	large ribosomal subunit [GO:0015934]	structural constituent of ribosome [GO:0003735]	large ribosomal subunit [GO:0015934]; structural constituent of ribosome [GO:0003735]; translation [GO:0006412]	tr|A0A174DBR8|A0A174DBR8_9FIRM 50S ribosomal protein L30 OS=Flavonifractor plautii OX=292800 GN=rpmD PE=3 SV=1	4	4	4	63.3	63.3	63.3	6.5164	60	0	169.12		By matching		By matching	By matching													By matching		896510000	0	3434000	0	2996900	2548200	0	0	0
A0A174DC58	unreviewed	50S ribosomal protein L2	rplB A4U99_01820 B5F52_12355 ERS852411_01191 ERS852504_03456 ERS852544_00671 GKE90_13405 GKE97_06655 GXM20_01910	A0A174DC58	A0A174DC58	Flavonifractor plautii (Fusobacterium plautii)	translation [GO:0006412]	large ribosomal subunit [GO:0015934]	rRNA binding [GO:0019843]; structural constituent of ribosome [GO:0003735]; transferase activity [GO:0016740]	large ribosomal subunit [GO:0015934]; rRNA binding [GO:0019843]; structural constituent of ribosome [GO:0003735]; transferase activity [GO:0016740]; translation [GO:0006412]	tr|A0A174DC58|A0A174DC58_9FIRM 50S ribosomal protein L2 OS=Flavonifractor plautii OX=292800 GN=rplB PE=3 SV=1	7	7	7	39	39	39	30.594	277	0	53.716				By matching		By matching											By matching			538180000	0	0	0	1776100	0	1976800	0	0
A0A174DDM5	unreviewed	50S ribosomal protein L3	rplC A4U99_01805 B5F52_12340 ERS852411_01194 ERS852504_03453 ERS852544_00668 GKE90_13420 GKE97_06640 GXM20_01895	A0A174DDM5	A0A174DDM5	Flavonifractor plautii (Fusobacterium plautii)	translation [GO:0006412]	ribosome [GO:0005840]	rRNA binding [GO:0019843]; structural constituent of ribosome [GO:0003735]	ribosome [GO:0005840]; rRNA binding [GO:0019843]; structural constituent of ribosome [GO:0003735]; translation [GO:0006412]	tr|A0A174DDM5|A0A174DDM5_9FIRM 50S ribosomal protein L3 OS=Flavonifractor plautii OX=292800 GN=rplC PE=3 SV=1	10	10	10	57.7	57.7	57.7	25.464	241	0	234.09			By matching	By matching		By matching	By matching		By matching	By matching			By matching		By matching					2987600000	0	0	1764600	1686400	0	966960	358020	0
A0A174DF27	unreviewed	50S ribosomal protein L18	rplR A4U99_01885 B5F52_12420 ERS852411_01179 ERS852504_03469 ERS852544_00684 GKE90_13340 GKE97_06720 GXM20_01975	A0A174DF27	A0A174DF27	Flavonifractor plautii (Fusobacterium plautii)	translation [GO:0006412]	ribosome [GO:0005840]	rRNA binding [GO:0019843]; structural constituent of ribosome [GO:0003735]	ribosome [GO:0005840]; rRNA binding [GO:0019843]; structural constituent of ribosome [GO:0003735]; translation [GO:0006412]	tr|A0A174DF27|A0A174DF27_9FIRM 50S ribosomal protein L18 OS=Flavonifractor plautii OX=292800 GN=rplR PE=3 SV=1	4	4	4	40.3	40.3	40.3	12.916	119	0	47.812											By matching		By matching				By matching		By matching	2193300000	0	0	0	0	0	0	0	0
A0A174DFI8	unreviewed	50S ribosomal protein L29	rpmC A4U99_01845 B5F52_12380 ERS852411_01187 ERS852504_03461 ERS852544_00676 GKE90_13380 GKE97_06680 GXM20_01935	A0A174DFI8	A0A174DFI8	Flavonifractor plautii (Fusobacterium plautii)	translation [GO:0006412]	ribosome [GO:0005840]	structural constituent of ribosome [GO:0003735]	ribosome [GO:0005840]; structural constituent of ribosome [GO:0003735]; translation [GO:0006412]	tr|A0A174DFI8|A0A174DFI8_9FIRM 50S ribosomal protein L29 OS=Flavonifractor plautii OX=292800 GN=rpmC PE=3 SV=1	2	2	2	32.8	32.8	32.8	7.716	67	0.00042849	4.1962					By matching	By matching	By matching	By matching	By matching	By matching				By matching	By matching	By matching		By matching		1159100000	0	0	0	0	1073700	418050	1003800	749730
A0A174DG20	unreviewed	50S ribosomal protein L14	rplN A4U99_01855 B5F52_12390 ERS852411_01185 ERS852504_03463 ERS852544_00678 GKE90_13370 GKE97_06690 GXM20_01945	A0A174DG20	A0A174DG20	Flavonifractor plautii (Fusobacterium plautii)	translation [GO:0006412]	large ribosomal subunit [GO:0015934]	rRNA binding [GO:0019843]; structural constituent of ribosome [GO:0003735]	large ribosomal subunit [GO:0015934]; rRNA binding [GO:0019843]; structural constituent of ribosome [GO:0003735]; translation [GO:0006412]	tr|A0A174DG20|A0A174DG20_9FIRM 50S ribosomal protein L14 OS=Flavonifractor plautii OX=292800 GN=rplN PE=3 SV=1	7	5	7	50	50	36.1	13.328	122	0	50.37	By MS/MS	By MS/MS	By MS/MS	By matching	By matching	By matching	By MS/MS	By matching	By matching	By MS/MS	By matching	By MS/MS	By MS/MS	By matching		By matching			By matching	2139400000	5553900	11508000	9240400	7379300	3082500	2543400	8284700	1171400
A0A174DG36	unreviewed	50S ribosomal protein L23	rplW A4U99_01815 B5F52_12350 ERS852411_01192 ERS852504_03455 ERS852544_00670 GKE90_13410 GKE97_06650 GXM20_01905	A0A174DG36	A0A174DG36	Flavonifractor plautii (Fusobacterium plautii)	translation [GO:0006412]	ribosome [GO:0005840]	rRNA binding [GO:0019843]; structural constituent of ribosome [GO:0003735]	ribosome [GO:0005840]; rRNA binding [GO:0019843]; structural constituent of ribosome [GO:0003735]; translation [GO:0006412]	tr|A0A174DG36|A0A174DG36_9FIRM 50S ribosomal protein L23 OS=Flavonifractor plautii OX=292800 GN=rplW PE=3 SV=1	4	4	4	43.4	43.4	43.4	11.162	99	0	84.688			By matching			By matching		By matching	By matching	By matching										943240000	0	0	609710	0	0	884150	0	799170
A0A174F5E9	unreviewed	Ketol-acid reductoisomerase (NADP(+)) (KARI) (EC 1.1.1.86) (Acetohydroxy-acid isomeroreductase) (AHIR) (Alpha-keto-beta-hydroxylacyl reductoisomerase)	ilvC A4U99_13155 B5F52_11130 ERS852411_01538 ERS852504_00992 ERS852544_01395 GKE90_04530 GKE97_11665 GXM20_08930	A0A174F5E9	A0A174F5E9	Flavonifractor plautii (Fusobacterium plautii)	isoleucine biosynthetic process [GO:0009097]; valine biosynthetic process [GO:0009099]		isomerase activity [GO:0016853]; ketol-acid reductoisomerase activity [GO:0004455]; magnesium ion binding [GO:0000287]; NADP binding [GO:0050661]	isomerase activity [GO:0016853]; ketol-acid reductoisomerase activity [GO:0004455]; magnesium ion binding [GO:0000287]; NADP binding [GO:0050661]; isoleucine biosynthetic process [GO:0009097]; valine biosynthetic process [GO:0009099]	tr|A0A174F5E9|A0A174F5E9_9FIRM Ketol-acid reductoisomerase (NADP(+)) OS=Flavonifractor plautii OX=292800 GN=ilvC PE=3 SV=1	3	3	3	12.7	12.7	12.7	36.908	339	0.00024643	6.2139	By matching	By matching	By matching		By matching	By matching	By matching		By matching											185180000	4071400	2685200	1261300	0	6093800	1757300	1686400	0
A0A174FFJ7	unreviewed	50S ribosomal protein L13	rplM A4U99_02085 B5F52_12625 ERS852411_01634 ERS852544_00726 GXM20_19060	A0A174FFJ7	A0A174FFJ7	Flavonifractor plautii (Fusobacterium plautii)	translation [GO:0006412]	ribosome [GO:0005840]	structural constituent of ribosome [GO:0003735]	ribosome [GO:0005840]; structural constituent of ribosome [GO:0003735]; translation [GO:0006412]	tr|A0A174FFJ7|A0A174FFJ7_9FIRM 50S ribosomal protein L13 OS=Flavonifractor plautii OX=292800 GN=rplM PE=3 SV=1	7	7	7	60.8	60.8	60.8	16.064	143	0.00026001	7.2171							By matching	By matching	By matching	By matching	By matching			By matching	By matching				By matching	1479900000	0	0	0	0	0	0	1442500	1530900
A0A174FLN8	unreviewed	Uncharacterized protein	A4U99_06895 B5F52_04945 ERS852411_01667 ERS852504_03267 GKE90_05230 GKE97_08955 GXM20_15450	A0A174FLN8	A0A174FLN8	Flavonifractor plautii (Fusobacterium plautii)					tr|A0A174FLN8|A0A174FLN8_9FIRM Uncharacterized protein OS=Flavonifractor plautii OX=292800 GN=A4U99_06895 PE=4 SV=1	2	2	2	25.5	25.5	25.5	11.837	102	0.00043855	4.4853	By matching	By matching		By matching		By matching	By matching	By matching	By matching	By matching		By matching								89757000	428780	315720	0	353770	0	468480	842950	676540
A0A174H076	unreviewed	Acetyl-CoA C-acetyltransferase (Acetyl-CoA acetyltransferase) (EC 2.3.1.9)	thlA_2 A4U99_00290 B5F52_15225 ERS852411_01968 GXM20_00415	A0A174H076;A0A1C7G5W8	A0A174H076	Flavonifractor plautii (Fusobacterium plautii)			acetyl-CoA C-acetyltransferase activity [GO:0003985]	acetyl-CoA C-acetyltransferase activity [GO:0003985]	tr|A0A174H076|A0A174H076_9FIRM Acetyl-CoA acetyltransferase OS=Flavonifractor plautii OX=292800 GN=thlA_2 PE=3 SV=1	16	16	16	63.5	63.5	63.5	43.998	419	0	195.44	By MS/MS	By MS/MS	By MS/MS	By matching	By MS/MS	By MS/MS	By matching	By MS/MS	By matching	By MS/MS	By MS/MS	By MS/MS	By MS/MS							4687500000	16151000	34981000	15451000	16874000	42545000	14659000	20097000	23278000
A0A174I8Y7	unreviewed	Propanediol dehydratase (Propanediol dehydratase medium subunit) (EC 4.2.1.28) (Propanediol/glycerol family dehydratase medium subunit)	pduD A4U99_10795 B5F52_07985 ERS852504_00023 ERS852544_00470 GKE90_03840 GKE97_03880 GXM20_06065	A0A174I8Y7;A0A1X8VAN9	A0A174I8Y7	Flavonifractor plautii (Fusobacterium plautii)			propanediol dehydratase activity [GO:0050215]	propanediol dehydratase activity [GO:0050215]	tr|A0A174I8Y7|A0A174I8Y7_9FIRM Propanediol dehydratase OS=Flavonifractor plautii OX=292800 GN=pduD PE=4 SV=1	6	6	6	38.6	38.6	38.6	23.602	220	0	258.96	By matching	By matching	By matching	By matching		By matching	By matching	By matching			By matching	By MS/MS	By matching				By matching		By matching	1084100000	1733800	2586500	3438300	1064300	0	2886500	1674900	651130
A0A174IA87	unreviewed	Glycerol dehydratase large subunit (EC 4.2.1.30) (Propanediol dehydratase) (Propanediol/glycerol family dehydratase large subunit)	dhaB pduC A4U99_10800 ERS852504_00022 ERS852544_00471 GKE90_03845 GXM20_06060	A0A174IA87	A0A174IA87	Flavonifractor plautii (Fusobacterium plautii)			cobalamin binding [GO:0031419]; glycerol dehydratase activity [GO:0046405]	cobalamin binding [GO:0031419]; glycerol dehydratase activity [GO:0046405]	tr|A0A174IA87|A0A174IA87_9FIRM Glycerol dehydratase large subunit OS=Flavonifractor plautii OX=292800 GN=dhaB PE=4 SV=1	8	8	8	23.7	23.7	23.7	60.699	553	0.0001872	19.87		By MS/MS	By MS/MS	By matching	By MS/MS	By matching		By matching	By matching		By matching	By matching	By matching					By matching		208270000	0	0	4113000	383810	3025100	493520	0	427580
A0A174IND6	unreviewed	NADH peroxidase (EC 1.11.1.1) (Rubrerythrin family protein)	rbr1_1 A4U99_10095 B5F52_08680 ERS852411_02255 ERS852504_00167 ERS852544_00325 GKE90_03140 GKE97_04585 GXM20_07060	A0A174IND6	A0A174IND6	Flavonifractor plautii (Fusobacterium plautii)			iron ion binding [GO:0005506]; NADH peroxidase activity [GO:0016692]	iron ion binding [GO:0005506]; NADH peroxidase activity [GO:0016692]	tr|A0A174IND6|A0A174IND6_9FIRM NADH peroxidase OS=Flavonifractor plautii OX=292800 GN=rbr1_1 PE=4 SV=1	8	8	8	43.5	43.5	43.5	20.162	177	0	323.31	By matching	By MS/MS	By MS/MS	By MS/MS	By MS/MS	By MS/MS	By MS/MS	By matching	By matching	By matching	By matching	By MS/MS	By matching	By matching			By matching	By matching		4080800000	1817000	6342700	8359700	14421000	15350000	6730000	3889500	6041700
A0A174IUH7	unreviewed	Ethanolamine utilization protein EutM (Propanediol utilization microcompartment protein PduA) (Propanediol utilization protein PduA)	pduA_3 pduA pduA_1 A4U99_10810 B5F52_07970 ERS852504_00020 ERS852544_00473 GKE90_03855 GKE97_03865	A0A174IUH7	A0A174IUH7	Flavonifractor plautii (Fusobacterium plautii)					tr|A0A174IUH7|A0A174IUH7_9FIRM Carbon dioxide concentrating mechanism/carboxysome shell protein OS=Flavonifractor plautii OX=292800 GN=pduA_1 PE=4 SV=1	7	4	5	85.9	66.3	51.1	9.4089	92	0.00017501	16.943	By MS/MS	By MS/MS	By MS/MS	By MS/MS	By MS/MS	By MS/MS	By MS/MS	By MS/MS	By MS/MS	By MS/MS	By MS/MS	By MS/MS	By MS/MS	By matching					By matching	2639900000	90766000	91847000	89593000	76227000	78786000	77146000	37204000	28621000
A0A174IV41	unreviewed	Diol dehydratase small subunit (Propanediol dehydratase) (Propanediol dehydratase small subunit) (EC 4.2.1.28)	pduE A4U99_10790 B5F52_07990 ERS852504_00024 ERS852544_00469 GKE90_03835 GKE97_03885 GXM20_06070	A0A174IV41	A0A174IV41	Flavonifractor plautii (Fusobacterium plautii)			propanediol dehydratase activity [GO:0050215]	propanediol dehydratase activity [GO:0050215]	tr|A0A174IV41|A0A174IV41_9FIRM Coenzyme B12-dependent glycerol dehydrogenase small subunit OS=Flavonifractor plautii OX=292800 GN=pduE PE=4 SV=1	8	8	8	62.6	62.6	62.6	18.64	171	0	143.2	By MS/MS	By MS/MS	By MS/MS	By matching	By MS/MS	By MS/MS	By matching	By matching	By matching	By matching	By MS/MS	By MS/MS	By matching	By matching				By matching		958650000	10068000	10440000	16030000	10300000	5842900	11877000	2689500	2526400
A0A174IVI7	unreviewed	Ethanolamine utilization protein EutM (Propanediol utilization microcompartment protein PduA) (Propanediol utilization protein PduA)	pduA pduA_1 pduA_3 A4U99_10770 B5F52_08010 ERS852504_00028 ERS852544_00465 GKE90_03815 GKE97_03905 GXM20_06090	A0A174IVI7	A0A174IVI7	Flavonifractor plautii (Fusobacterium plautii)					tr|A0A174IVI7|A0A174IVI7_9FIRM Carbon dioxide concentrating mechanism/carboxysome shell protein OS=Flavonifractor plautii OX=292800 GN=pduA_3 PE=4 SV=1	6	3	3	73.6	38.5	38.5	9.2287	91	0.00033162	14.304	By MS/MS	By MS/MS	By MS/MS	By MS/MS	By MS/MS	By MS/MS	By MS/MS	By MS/MS	By MS/MS	By MS/MS	By MS/MS	By MS/MS	By MS/MS			By matching		By matching	By matching	1211600000	19748000	24841000	44206000	31453000	23132000	22228000	9756600	11634000
A0A174J0Q8	unreviewed	Aldehyde-alcohol dehydrogenase (Butanol dehydrogenase)	adhE_1 adhE_2 A4U99_10310 ERS852411_03005 ERS852544_00369	A0A174J0Q8	A0A174J0Q8	Flavonifractor plautii (Fusobacterium plautii)			metal ion binding [GO:0046872]; oxidoreductase activity [GO:0016491]	metal ion binding [GO:0046872]; oxidoreductase activity [GO:0016491]	tr|A0A174J0Q8|A0A174J0Q8_9FIRM Alcohol dehydrogenase, class IV OS=Flavonifractor plautii OX=292800 GN=adhE_1 PE=4 SV=1	16	16	16	67.4	67.4	67.4	42.603	393	0	323.31	By MS/MS	By MS/MS	By MS/MS	By MS/MS	By MS/MS	By matching	By MS/MS	By MS/MS	By MS/MS	By MS/MS	By MS/MS	By MS/MS	By MS/MS						By matching	15414000000	10386000	10737000	7112000	8063600	15815000	8753700	3740700	3420000
A0A174JIU7	unreviewed	50S ribosomal protein L19	rplS A4U99_08970 B5F52_02080 ERS852411_02484 ERS852504_00438 ERS852544_01689 GKE90_00970 GKE97_00410 GXM20_11605	A0A174JIU7	A0A174JIU7	Flavonifractor plautii (Fusobacterium plautii)	translation [GO:0006412]	ribosome [GO:0005840]	structural constituent of ribosome [GO:0003735]	ribosome [GO:0005840]; structural constituent of ribosome [GO:0003735]; translation [GO:0006412]	tr|A0A174JIU7|A0A174JIU7_9FIRM 50S ribosomal protein L19 OS=Flavonifractor plautii OX=292800 GN=rplS PE=3 SV=1	5	5	5	49.6	49.6	49.6	12.923	113	0.00044553	4.6897				By matching			By matching	By matching		By matching	By matching	By matching		By matching			By matching			1195800000	0	0	0	3208000	0	0	3301500	5726200
A0A174JMS0	unreviewed	Uncharacterized conserved protein	A4U99_08455 B5F52_02600 ERS852504_00543 ERS852544_02489 GKE90_00445 GKE97_00925 GXM20_12195	A0A174JMS0	A0A174JMS0	Flavonifractor plautii (Fusobacterium plautii)					tr|A0A174JMS0|A0A174JMS0_9FIRM Uncharacterized conserved protein OS=Flavonifractor plautii OX=292800 GN=A4U99_08455 PE=4 SV=1	5	5	5	61.8	61.8	61.8	14.502	131	0	62.008					By matching							By matching	By matching	By matching				By matching	By matching	106780000	0	0	0	0	518390	0	0	0
A0A174KHB3	unreviewed	Elongation factor G (EF-G)	fusA fusA_1 A4U99_12935 B5F52_10915 ERS852504_00949 ERS852544_01438 GKE90_04310 GKE97_11450 GXM20_09145	A0A174KHB3	A0A174KHB3	Flavonifractor plautii (Fusobacterium plautii)		cytoplasm [GO:0005737]	GTPase activity [GO:0003924]; GTP binding [GO:0005525]; translation elongation factor activity [GO:0003746]	cytoplasm [GO:0005737]; GTP binding [GO:0005525]; GTPase activity [GO:0003924]; translation elongation factor activity [GO:0003746]	tr|A0A174KHB3|A0A174KHB3_9FIRM Elongation factor G OS=Flavonifractor plautii OX=292800 GN=fusA_1 PE=3 SV=1	29	24	24	67.3	59.3	59.3	77.766	701	0	113.96	By matching	By matching	By matching	By matching	By matching	By matching	By matching	By matching	By matching	By matching	By matching	By MS/MS	By matching	By matching			By matching	By matching		2501300000	0	0	1418900	3010200	645830	1922800	0	1349500
A0A174KRL6	unreviewed	Tyrosine--tRNA ligase (EC 6.1.1.1) (Tyrosyl-tRNA synthetase) (TyrRS)	tyrS A4U99_09605 ERS852544_00045 GKE90_01585 GXM20_10960	A0A174KRL6	A0A174KRL6	Flavonifractor plautii (Fusobacterium plautii)	tyrosyl-tRNA aminoacylation [GO:0006437]	cytoplasm [GO:0005737]	ATP binding [GO:0005524]; RNA binding [GO:0003723]; tyrosine-tRNA ligase activity [GO:0004831]	cytoplasm [GO:0005737]; ATP binding [GO:0005524]; RNA binding [GO:0003723]; tyrosine-tRNA ligase activity [GO:0004831]; tyrosyl-tRNA aminoacylation [GO:0006437]	tr|A0A174KRL6|A0A174KRL6_9FIRM Tyrosine--tRNA ligase OS=Flavonifractor plautii OX=292800 GN=tyrS_1 PE=3 SV=1	5	4	4	25.7	23.5	23.5	45.692	409	0	35.403	By matching		By matching	By matching			By matching	By matching	By matching	By matching	By matching	By matching				By matching			By matching	135970000	0	0	0	608810	0	0	0	0
A0A174KZP5	unreviewed	Ethanolamine ammonia-lyase light chain (EC 4.3.1.7) (Ethanolamine ammonia-lyase small subunit)	eutC_2 eutC A4U99_13310 ERS852544_01362 GXM20_08765	A0A174KZP5	A0A174KZP5	Flavonifractor plautii (Fusobacterium plautii)	cellular amino acid metabolic process [GO:0006520]; ethanolamine catabolic process [GO:0046336]		cobalamin binding [GO:0031419]; ethanolamine ammonia-lyase activity [GO:0008851]	cobalamin binding [GO:0031419]; ethanolamine ammonia-lyase activity [GO:0008851]; cellular amino acid metabolic process [GO:0006520]; ethanolamine catabolic process [GO:0046336]	tr|A0A174KZP5|A0A174KZP5_9FIRM Ethanolamine ammonia-lyase light chain OS=Flavonifractor plautii OX=292800 GN=eutC_1 PE=3 SV=1	1	1	1	4.1	4.1	4.1	31.772	295	0.00092593	2.7639	By MS/MS	By MS/MS	By matching	By MS/MS	By MS/MS	By MS/MS						By matching								35091000	3973600	1956700	831420	0	2126600	1197500	0	0
A0A174L5B8	unreviewed	HB (HU family DNA-binding protein) (Integration host factor subunit alpha)	hup_2 hup_1 A4U99_16710 B5F52_07115 ERS852411_02766 ERS852504_04830 ERS852544_01073 GKE90_10965 GKE97_21995 GXM20_02905	A0A174L5B8	A0A174L5B8	Flavonifractor plautii (Fusobacterium plautii)	chromosome condensation [GO:0030261]		DNA binding [GO:0003677]	DNA binding [GO:0003677]; chromosome condensation [GO:0030261]	tr|A0A174L5B8|A0A174L5B8_9FIRM DNA-binding protein OS=Flavonifractor plautii OX=292800 GN=hup_2 PE=3 SV=1	4	4	4	49.5	49.5	49.5	9.6642	91	0	323.31	By matching	By matching		By matching	By matching	By matching	By matching		By matching	By matching		By matching	By matching							2586900000	3035900	2258300	0	764000	2567500	2393600	467110	0
A0A174L834	unreviewed	Ion-translocating oxidoreductase complex subunit C (EC 7.-.-.-) (Rnf electron transport complex subunit C)	rnfC_3 rnfC rnfC_1 rnfC_4 rsxC A4U99_13135 B5F52_11110 ERS852411_01533 ERS852504_00987 ERS852544_01400 GKE90_04510 GKE97_11645 GXM20_08950	A0A174L834	A0A174L834	Flavonifractor plautii (Fusobacterium plautii)		plasma membrane [GO:0005886]	4 iron, 4 sulfur cluster binding [GO:0051539]; electron transfer activity [GO:0009055]; metal ion binding [GO:0046872]	plasma membrane [GO:0005886]; 4 iron, 4 sulfur cluster binding [GO:0051539]; electron transfer activity [GO:0009055]; metal ion binding [GO:0046872]	tr|A0A174L834|A0A174L834_9FIRM Ion-translocating oxidoreductase complex subunit C OS=Flavonifractor plautii OX=292800 GN=rnfC_3 PE=3 SV=1	13	13	13	50	50	50	47.833	448	0	29.14	By MS/MS	By MS/MS	By matching	By MS/MS	By MS/MS	By MS/MS			By matching	By matching	By matching	By matching	By matching							940050000	6726000	6795800	2958800	5073700	7280100	4155000	0	0
A0A174LS05	unreviewed	Glycerol dehydrogenase (EC 1.1.1.6) (Iron-containing alcohol dehydrogenase)	gldA_1 A4U99_17860 B5F52_10735 ERS852504_01068 GKE90_14585 GKE97_22565 GXM20_19430	A0A174LS05	A0A174LS05	Flavonifractor plautii (Fusobacterium plautii)			glycerol dehydrogenase [NAD+] activity [GO:0008888]; metal ion binding [GO:0046872]	glycerol dehydrogenase [NAD+] activity [GO:0008888]; metal ion binding [GO:0046872]	tr|A0A174LS05|A0A174LS05_9FIRM Glycerol dehydrogenase OS=Flavonifractor plautii OX=292800 GN=gldA_1 PE=4 SV=1	11	11	11	52.3	52.3	52.3	40.032	371	0	129.57	By MS/MS	By MS/MS	By MS/MS	By MS/MS	By matching	By matching	By matching	By matching	By matching		By matching	By matching	By matching		By matching	By matching				6651400000	9437800	11544000	14625000	1711800	1419400	2221800	1035800	2009300
A0A174LSB7	unreviewed	Sorbitol dehydrogenase (EC 1.1.1.14) (Zinc-binding dehydrogenase)	gutB_1 gutB_2 A4U99_17895 B5F52_10770 ERS852504_01061 ERS852544_02239 GKE90_14620 GKE97_22600 GXM20_19465	A0A174LSB7	A0A174LSB7	Flavonifractor plautii (Fusobacterium plautii)			L-iditol 2-dehydrogenase activity [GO:0003939]; zinc ion binding [GO:0008270]	L-iditol 2-dehydrogenase activity [GO:0003939]; zinc ion binding [GO:0008270]	tr|A0A174LSB7|A0A174LSB7_9FIRM Alcohol dehydrogenase OS=Flavonifractor plautii OX=292800 GN=gutB_1 PE=3 SV=1	20	20	20	78.1	78.1	78.1	37.984	343	0	323.31	By matching	By matching	By MS/MS	By MS/MS	By MS/MS	By MS/MS	By matching	By matching	By matching	By matching	By MS/MS	By matching	By matching			By matching		By matching	By matching	31735000000	9979400	9275700	15454000	13852000	19693000	10863000	1849800	1701200
A0A174LW52	unreviewed	Glyoxalase/bleomycin resistance/dioxygenase family protein (Methylmalonyl-CoA epimerase) (VOC family protein)	A4U99_17810 B5F52_10685 ERS852504_01078 GKE90_14535 GKE97_22515 GXM20_19380	A0A174LW52	A0A174LW52	Flavonifractor plautii (Fusobacterium plautii)			dioxygenase activity [GO:0051213]	dioxygenase activity [GO:0051213]	tr|A0A174LW52|A0A174LW52_9FIRM Glyoxalase/bleomycin resistance/dioxygenase family protein OS=Flavonifractor plautii OX=292800 GN=A4U99_17810 PE=4 SV=1	2	2	2	34.6	34.6	34.6	14.152	130	0.00031022	11.843														By matching		By matching				112680000	0	0	0	0	0	0	0	0
A0A174MP87	unreviewed	50S ribosomal protein L10	rplJ A4U99_08050 ERS852411_03030 GKE90_00040	A0A174MP87	A0A174MP87	Flavonifractor plautii (Fusobacterium plautii)	ribosome biogenesis [GO:0042254]; translation [GO:0006412]	large ribosomal subunit [GO:0015934]	large ribosomal subunit rRNA binding [GO:0070180]; structural constituent of ribosome [GO:0003735]	large ribosomal subunit [GO:0015934]; large ribosomal subunit rRNA binding [GO:0070180]; structural constituent of ribosome [GO:0003735]; ribosome biogenesis [GO:0042254]; translation [GO:0006412]	tr|A0A174MP87|A0A174MP87_9FIRM 50S ribosomal protein L10 OS=Flavonifractor plautii OX=292800 GN=rplJ PE=3 SV=1	7	7	7	63	63	63	19.229	181	0	205.57	By matching		By MS/MS		By matching	By matching	By matching				By matching	By matching	By matching							2732500000	4195700	0	4567000	0	859640	1378900	408770	0
A0A174MYW2	unreviewed	Proline--tRNA ligase (EC 6.1.1.15) (Prolyl-tRNA synthetase) (ProRS)	proS A4U99_01730 B5F52_12260 ERS852544_00652	A0A174MYW2	A0A174MYW2	Flavonifractor plautii (Fusobacterium plautii)	prolyl-tRNA aminoacylation [GO:0006433]	cytoplasm [GO:0005737]	ATP binding [GO:0005524]; proline-tRNA ligase activity [GO:0004827]	cytoplasm [GO:0005737]; ATP binding [GO:0005524]; proline-tRNA ligase activity [GO:0004827]; prolyl-tRNA aminoacylation [GO:0006433]	tr|A0A174MYW2|A0A174MYW2_9FIRM Proline--tRNA ligase OS=Flavonifractor plautii OX=292800 GN=proS_2 PE=3 SV=1	6	6	6	18	18	18	54.43	479	0.00034961	5.3428	By matching	By matching		By matching		By matching	By matching				By matching									197650000	598000	1220800	0	619080	0	862970	744520	0
A0A174N1A5	unreviewed	30S ribosomal protein S17	rpsQ A4U99_01850 B5F52_12385 ERS852411_01186 ERS852504_03462 ERS852544_00677 GKE90_13375 GKE97_06685 GXM20_01940	A0A174N1A5	A0A174N1A5	Flavonifractor plautii (Fusobacterium plautii)	translation [GO:0006412]	ribosome [GO:0005840]	rRNA binding [GO:0019843]; structural constituent of ribosome [GO:0003735]	ribosome [GO:0005840]; rRNA binding [GO:0019843]; structural constituent of ribosome [GO:0003735]; translation [GO:0006412]	tr|A0A174N1A5|A0A174N1A5_9FIRM 30S ribosomal protein S17 OS=Flavonifractor plautii OX=292800 GN=rpsQ PE=3 SV=1	2	2	2	25.6	25.6	25.6	9.9366	86	0.007939	1.681											By matching	By matching								186310000	0	0	0	0	0	0	0	0
A0A174N1P4	unreviewed	30S ribosomal protein S8	rpsH A4U99_01875 B5F52_12410 ERS852411_01181 ERS852504_03467 ERS852544_00682 GKE90_13350 GKE97_06710 GXM20_01965	A0A174N1P4	A0A174N1P4	Flavonifractor plautii (Fusobacterium plautii)	translation [GO:0006412]	ribosome [GO:0005840]	rRNA binding [GO:0019843]; structural constituent of ribosome [GO:0003735]	ribosome [GO:0005840]; rRNA binding [GO:0019843]; structural constituent of ribosome [GO:0003735]; translation [GO:0006412]	tr|A0A174N1P4|A0A174N1P4_9FIRM 30S ribosomal protein S8 OS=Flavonifractor plautii OX=292800 GN=rpsH_2 PE=3 SV=1	6	6	6	57.6	57.6	57.6	14.33	132	0	197.9	By matching	By matching	By matching	By matching	By matching	By matching	By matching	By MS/MS	By matching	By matching	By MS/MS	By MS/MS	By matching	By matching	By matching	By matching				2816700000	3664600	4407800	7633700	2023600	1941700	2728000	2326200	2696200
A0A174N2Q1	unreviewed	Translation initiation factor IF-1	infA A4U99_01925 B5F52_12460 ERS852411_02928 ERS852504_03477 ERS852544_00692 GKE90_13300 GKE97_06760 GXM20_02015	A0A174N2Q1	A0A174N2Q1	Flavonifractor plautii (Fusobacterium plautii)		cytoplasm [GO:0005737]	ribosome binding [GO:0043022]; rRNA binding [GO:0019843]; translation initiation factor activity [GO:0003743]	cytoplasm [GO:0005737]; ribosome binding [GO:0043022]; rRNA binding [GO:0019843]; translation initiation factor activity [GO:0003743]	tr|A0A174N2Q1|A0A174N2Q1_9FIRM Translation initiation factor IF-1 OS=Flavonifractor plautii OX=292800 GN=infA PE=3 SV=1	1	1	1	16.7	16.7	16.7	8.1073	72	0.0035351	2.0875											By matching			By matching			By matching		By matching	165100000	0	0	0	0	0	0	0	0
A0A174N751	unreviewed	Uncharacterized protein	A4U99_02105 B5F52_12645 ERS852411_01631 ERS852504_01387 ERS852544_00730 GKE90_18765 GKE97_07570 GXM20_19035	A0A174N751	A0A174N751	Flavonifractor plautii (Fusobacterium plautii)					tr|A0A174N751|A0A174N751_9FIRM Putative PilT-like ATPase OS=Flavonifractor plautii OX=292800 GN=A4U99_02105 PE=4 SV=1	4	4	4	57.7	57.7	57.7	15.358	137	0	98.707	By matching							By matching							By matching	By matching				3522200000	703420	0	0	0	0	0	0	3340000
A0A174NB67	unreviewed	3-hydroxybutyryl-CoA dehydrogenase (EC 1.1.1.157)	fadB2_2 A4U99_15050 ERS852544_03107	A0A174NB67	A0A174NB67	Flavonifractor plautii (Fusobacterium plautii)	fatty acid metabolic process [GO:0006631]		3-hydroxyacyl-CoA dehydrogenase activity [GO:0003857]; 3-hydroxybutyryl-CoA dehydrogenase activity [GO:0008691]; NAD+ binding [GO:0070403]	3-hydroxyacyl-CoA dehydrogenase activity [GO:0003857]; 3-hydroxybutyryl-CoA dehydrogenase activity [GO:0008691]; NAD+ binding [GO:0070403]; fatty acid metabolic process [GO:0006631]	tr|A0A174NB67|A0A174NB67_9FIRM 3-hydroxybutyryl-CoA dehydrogenase OS=Flavonifractor plautii OX=292800 GN=fadB2 PE=4 SV=1	10	10	10	54.1	54.1	54.1	30.397	283	0	323.31	By MS/MS	By MS/MS	By MS/MS	By MS/MS	By MS/MS	By MS/MS	By MS/MS	By MS/MS	By MS/MS	By MS/MS	By MS/MS	By MS/MS	By MS/MS		By matching	By matching	By matching			3081900000	28781000	31094000	21783000	32470000	31468000	28629000	6523700	6800500
A0A174NPZ0	unreviewed	L-erythro-3,5-diaminohexanoate dehydrogenase	A4U99_02925 ERS852504_01274 ERS852544_00838 GKE90_19085 GKE97_02230 GXM20_18505	A0A174NPZ0	A0A174NPZ0	Flavonifractor plautii (Fusobacterium plautii)					tr|A0A174NPZ0|A0A174NPZ0_9FIRM L-erythro-3,5-diaminohexanoate dehydrogenase OS=Flavonifractor plautii OX=292800 GN=A4U99_02925 PE=4 SV=1	21	21	21	84.7	84.7	84.7	37.092	346	0	323.31	By MS/MS	By MS/MS	By MS/MS	By MS/MS	By MS/MS	By MS/MS	By MS/MS	By matching	By MS/MS	By matching	By MS/MS	By MS/MS	By MS/MS	By matching	By matching	By matching	By matching	By matching	By matching	31417000000	66092000	65756000	64047000	65156000	48504000	58662000	15635000	12788000
A0A174NRU2	unreviewed	Methylaspartate mutase subunit S	A4U99_02910 B5F52_01560 ERS852411_03688 ERS852504_01277 ERS852544_00835 GKE90_19070 GKE97_02215	A0A174NRU2	A0A174NRU2	Flavonifractor plautii (Fusobacterium plautii)			cobalamin binding [GO:0031419]; metal ion binding [GO:0046872]; protein dimerization activity [GO:0046983]	cobalamin binding [GO:0031419]; metal ion binding [GO:0046872]; protein dimerization activity [GO:0046983]	tr|A0A174NRU2|A0A174NRU2_9FIRM D-ornithine aminomutase E component OS=Flavonifractor plautii OX=292800 GN=A4U99_02910 PE=4 SV=1	12	12	12	58	58	58	28.935	262	0	323.31	By MS/MS	By MS/MS	By MS/MS	By MS/MS	By MS/MS	By MS/MS	By MS/MS	By MS/MS	By MS/MS	By MS/MS	By MS/MS	By MS/MS	By MS/MS				By matching			4910700000	10843000	9661500	20072000	8511100	16713000	9239600	4754600	6271300
A0A174P6K0	unreviewed	Pyrroloquinoline quinone biosynthesis protein PqqE (Radical SAM protein)	A4U99_06155 B5F52_00875 ERS852411_01623 ERS852504_04129 ERS852544_01954 GKE90_02060 GKE97_17460 GXM20_05765	A0A174P6K0	A0A174P6K0	Flavonifractor plautii (Fusobacterium plautii)			catalytic activity [GO:0003824]; iron-sulfur cluster binding [GO:0051536]; metal ion binding [GO:0046872]	catalytic activity [GO:0003824]; iron-sulfur cluster binding [GO:0051536]; metal ion binding [GO:0046872]	tr|A0A174P6K0|A0A174P6K0_9FIRM Pyrroloquinoline quinone biosynthesis protein PqqE OS=Flavonifractor plautii OX=292800 GN=A4U99_06155 PE=4 SV=1	16	16	16	62	62	62	52.12	460	0	278.43	By matching	By matching	By matching	By matching	By matching	By matching	By matching			By matching		By matching	By matching				By matching			3336700000	12567000	5318300	5782500	922700	3115500	7029300	1005200	0
A0A174P7R7	unreviewed	Hydrolase	A4U99_06035 ERS852544_01928	A0A174P7R7	A0A174P7R7	Flavonifractor plautii (Fusobacterium plautii)	carbohydrate metabolic process [GO:0005975]		hydrolase activity [GO:0016787]	hydrolase activity [GO:0016787]; carbohydrate metabolic process [GO:0005975]	tr|A0A174P7R7|A0A174P7R7_9FIRM Hydrolase OS=Flavonifractor plautii OX=292800 GN=A4U99_06035 PE=4 SV=1	2	2	2	4.8	4.8	4.8	46.899	420	0.0032931	2.1107	By matching	By matching	By matching	By matching	By matching	By matching	By matching	By matching	By matching	By matching	By matching	By matching								395170000	40715000	32912000	28585000	47001000	38989000	29474000	14271000	13296000
A0A174PDZ2	unreviewed	ABC transporter ATP-binding protein (ATP-binding cassette domain-containing protein) (Galactose/methyl galactoside import ATP-binding protein MglA) (EC 3.6.3.17) (Heme ABC transporter ATP-binding protein)	mglA_2 mglA mglA_1 A4U99_05945 B5F52_00670 ERS852411_00491 ERS852504_03576 ERS852544_00845 GKE97_17250 GXM20_05550	A0A174PDZ2	A0A174PDZ2	Flavonifractor plautii (Fusobacterium plautii)			ATPase activity [GO:0016887]; ATPase-coupled monosaccharide transmembrane transporter activity [GO:0015407]; ATP binding [GO:0005524]	ATP binding [GO:0005524]; ATPase activity [GO:0016887]; ATPase-coupled monosaccharide transmembrane transporter activity [GO:0015407]	tr|A0A174PDZ2|A0A174PDZ2_9FIRM ABC transporter OS=Flavonifractor plautii OX=292800 GN=mglA_1 PE=4 SV=1	3	3	3	11.2	11.2	11.2	57.201	516	0.0006904	3.3406	By matching	By matching				By matching										By matching				169550000	798240	381280	0	0	0	259990	0	0
A0A174PGH9	unreviewed	NADH peroxidase (EC 1.11.1.1) (Reverse rubrerythrin)	rbr3A A4U99_05755 B5F52_00475 ERS852504_04479 ERS852544_00895 GKE97_17055 GXM20_05250	A0A174PGH9	A0A174PGH9	Flavonifractor plautii (Fusobacterium plautii)			iron ion binding [GO:0005506]; NADH peroxidase activity [GO:0016692]	iron ion binding [GO:0005506]; NADH peroxidase activity [GO:0016692]	tr|A0A174PGH9|A0A174PGH9_9FIRM NADH peroxidase OS=Flavonifractor plautii OX=292800 GN=rbr3A_1 PE=4 SV=1	10	9	10	63.3	63.3	56.7	19.989	180	0	323.31	By MS/MS	By MS/MS	By MS/MS	By MS/MS	By MS/MS	By MS/MS	By MS/MS	By MS/MS	By MS/MS	By MS/MS	By MS/MS	By MS/MS	By MS/MS		By matching		By matching	By matching		17327000000	186530000	233870000	159300000	219090000	213850000	177300000	144030000	137450000
A0A174PGY1	unreviewed	4-hydroxybutyryl-CoA dehydratase (4-hydroxybutyryl-CoA dehydratase/vinylacetyl-CoA-Delta-isomerase) (EC 4.2.1.120)	abfD_1 abfD abfD_2 A4U99_00480 B5F52_14555 ERS852411_02003 ERS852504_01793 ERS852544_03571 GKE90_16365 GKE97_18560 GXM20_00770	A0A174PGY1	A0A174PGY1	Flavonifractor plautii (Fusobacterium plautii)			4-hydroxybutanoyl-CoA dehydratase activity [GO:0043721]; isomerase activity [GO:0016853]; oxidoreductase activity, acting on the CH-CH group of donors [GO:0016627]	4-hydroxybutanoyl-CoA dehydratase activity [GO:0043721]; isomerase activity [GO:0016853]; oxidoreductase activity, acting on the CH-CH group of donors [GO:0016627]	tr|A0A174PGY1|A0A174PGY1_9FIRM 4-hydroxybutyryl-CoA dehydratase OS=Flavonifractor plautii OX=292800 GN=abfD_1 PE=4 SV=1	11	11	11	39.1	39.1	39.1	53.601	483	0	59.121	By MS/MS	By MS/MS	By MS/MS	By MS/MS	By MS/MS	By MS/MS	By MS/MS	By MS/MS	By MS/MS	By MS/MS	By MS/MS	By MS/MS	By MS/MS							800090000	51982000	40306000	24641000	31665000	38174000	38766000	10414000	11796000
A0A174PKT0	unreviewed	Purine nucleoside phosphorylase (EC 2.4.2.1) (Inosine-guanosine phosphorylase)	punA A4U99_16730 B5F52_07135 ERS852504_04826 ERS852544_01069 GKE90_10985 GKE97_22015 GXM20_02885	A0A174PKT0	A0A174PKT0	Flavonifractor plautii (Fusobacterium plautii)	nucleoside metabolic process [GO:0009116]		purine-nucleoside phosphorylase activity [GO:0004731]	purine-nucleoside phosphorylase activity [GO:0004731]; nucleoside metabolic process [GO:0009116]	tr|A0A174PKT0|A0A174PKT0_9FIRM Purine nucleoside phosphorylase OS=Flavonifractor plautii OX=292800 GN=punA_1 PE=3 SV=1	9	9	9	61.5	61.5	61.5	30.102	275	0	93.555			By matching		By matching	By matching						By matching								421300000	0	0	1193100	0	1444400	748740	0	0
A0A174PNB5	unreviewed	Methylmalonyl-CoA carboxyltransferase (Methylmalonyl-CoA carboxyltransferase 12S subunit) (EC 2.1.3.1)	A4U99_07505 ERS852544_01082 GKE90_12300	A0A174PNB5	A0A174PNB5	Flavonifractor plautii (Fusobacterium plautii)			ligase activity [GO:0016874]; methylmalonyl-CoA carboxytransferase activity [GO:0047154]	ligase activity [GO:0016874]; methylmalonyl-CoA carboxytransferase activity [GO:0047154]	tr|A0A174PNB5|A0A174PNB5_9FIRM Acetyl-CoA carboxylase, carboxyl transferase subunit alpha OS=Flavonifractor plautii OX=292800 GN=A4U99_07505 PE=4 SV=1	7	7	7	28.7	28.7	28.7	55.118	513	0	37.194							By matching		By matching	By matching							By matching	By matching		475880000	0	0	0	0	0	0	803870	0
A0A174PZU7	unreviewed	Electron transfer flavoprotein small subunit (Electron transfer flavoprotein subunit beta) (Electron transfer flavoprotein subunit beta/FixA family protein)	etfB A4U99_15040 B5F52_17790 ERS852504_02021 ERS852544_03105 GKE90_09680 GKE97_03370 GXM20_04650	A0A174PZU7	A0A174PZU7	Flavonifractor plautii (Fusobacterium plautii)			electron transfer activity [GO:0009055]	electron transfer activity [GO:0009055]	tr|A0A174PZU7|A0A174PZU7_9FIRM Electron transfer flavoprotein small subunit OS=Flavonifractor plautii OX=292800 GN=etfB PE=4 SV=1	17	16	17	78.6	78.6	72.2	28.502	266	0	323.31	By MS/MS	By MS/MS	By MS/MS	By MS/MS	By MS/MS	By MS/MS	By MS/MS	By MS/MS	By MS/MS	By MS/MS	By MS/MS	By MS/MS	By MS/MS			By matching		By matching	By matching	18234000000	41544000	45286000	29143000	24274000	24646000	16904000	15639000	18726000
[truncated: 6,234 more rows]
[truncated: 35 more columns]

## Sheet: S5
Table S5 Overview of detected proteomes
[truncated: 28 more rows]

## Sheet: S6
Table S6. Microbial and host proteins used in statistical analyses.
[truncated: 2,836 more rows]
[truncated: 37 more columns]

[truncated: 7 more sheets: S7, S9, S10, S11, S12, S13, S14]
